# Supplementary material for: Properties of a Prototype Corium of Nuclear Reactor
Source: Hindawi journal article supplement (doi:10.1155/2018/5208510), 2018-09-02
Supplement: f1 [file 5208510.f1.zip]

Archive with 7 entries (6 files):
- 5208510.f1/
- 5208510.f1/Tac_1.ASC
- 5208510.f1/Tac_1.xrdml
- 5208510.f1/Tac_1_kA1.ASC
- 5208510.f1/Tac_2.ASC
- 5208510.f1/Tac_2.xrdml
- 5208510.f1/Tac_2_kA1.ASC
