# Supplementary material for: Properties of a Prototype Corium of Nuclear Reactor
Source: Hindawi journal article supplement (doi:10.1155/2018/5208510), 2018-09-02
Supplement: f1 [file 5208510.f1.zip › 5208510.f1/Tac_1.ASC]

10.01813028 1082
10.04413028 1080.01984458516
10.07013028 993.74632349429
10.09613028 1019.16652742315
10.12213028 986.389120961423
10.14813028 1042.02331222553
10.17413028 1055.34512868954
10.20013028 995.514643124621
10.22613028 1037.03108296737
10.25213028 1011.85762026343
10.27813028 992.786012664686
10.30413028 975.855468712757
10.33013028 976.642797466997
10.35613028 1002.25929569674
10.38213028 1074.88703230863
10.40813028 1040.03705699108
10.43413028 1001.71524052692
10.46013028 983.530184608305
10.48613028 978.535803799406
10.51213028 995.85248170083
10.53813028 969.540942362007
10.56413028 1022.95565289557
10.59013028 995.224264460516
10.61613028 1021.58936353111
10.64213028 1029.19067510979
10.66813028 1034.76748416914
10.69413028 1033.28989803554
10.72013028 984.413623480686
10.74613028 1010.33054846293
10.77213028 1016.31619727299
10.79813028 976.883438872314
10.82413028 1010.46862509795
10.85013028 993.098261668812
10.87613028 964.91153482782
10.90213028 995.782670820206
10.92813028 998.334725768533
10.95413028 992.571189868184
10.98013028 976.279495114525
11.00613028 974.721340346596
11.03213028 960.996051731139
11.05813028 984.583389507387
11.08413028 982.493001821337
11.11013028 934.087023286611
11.13613028 957.293972100285
11.16213028 982.548713103848
11.18813028 962.162579154285
11.21413028 924.908422020144
11.24013028 924.346089946554
11.26613028 944.571189868251
11.29213028 953.707114952533
11.31813028 934.294075341141
11.34413028 899.602627668236
11.37013028 919.074365573935
11.39613028 939.043511643243
11.42213028 942.390082218422
11.44813028 962.634191264102
11.47413028 952.780748306204
11.50013028 934.565570677087
11.52613028 931.452957818393
11.55213028 927.585415262314
11.57813028 920.120738433156
11.60413028 906.447338627291
11.63013028 911.390082218423
11.65613028 926.50041773056
11.68213028 913.050801756586
11.70813028 911.397498127644
11.73413028 937.132812276541
11.76013028 919.631078456299
11.78613028 911.228693357877
11.81213028 915.900296445683
11.83813028 906.083681442072
11.86413028 912.569999574512
11.89013028 911.580379940571
11.91613028 866.821524529413
11.94213028 892.657503489565
11.96813028 905.62821724038
11.99413028 920.278659653404
12.02013028 903.200826439049
12.04613028 873.138202430903
12.07213028 899.487027797618
12.09813028 889.875668130539
12.12413028 876.748120212421
12.15013028 884.831675858733
12.17613028 877.175740050489
12.20213028 897.673628842608
12.22813028 856.62642052226
12.25413028 857.50639175428
12.28013028 849.701266724696
12.30613028 886.799631634307
12.33213028 850.532336159045
12.35813028 852.456677050516
12.38413028 890.913789619426
12.41013028 828.224516052276
12.43613028 862
12.46213028 863.615307935879
12.48813028 885.770471181003
12.51413028 881.145721580982
12.54013028 865.05105334841
12.56613028 891.033463554784
12.59213028 857
12.61813028 857.015541483683
12.64413028 858.995696898519
12.67013028 850.108664589839
12.69613028 893.032170020246
12.72213028 833.978942566071
12.74813028 832
12.77413028 850.964739726979
12.80013028 843.555167756068
12.82613028 878.278911245167
12.85213028 841.505785329841
12.87813028 874.341912641016
12.90413028 826.778345163702
12.93013028 797.005012766666
12.95613028 881.878093828067
12.98213028 883.573696251611
13.00813028 857.949782112709
13.03413028 801.361128246718
13.06013028 842.345506077258
13.08613028 832.929102066427
13.11213028 832.276988731108
13.13813028 858.089071596495
13.16413028 843.215532461674
13.19013028 799.315465052725
13.21613028 813.94585639882
13.24213028 824.078542879533
13.26813028 823.480573145397
13.29413028 823.749791134664
13.32013028 852.854884843398
13.34613028 858.620320702659
13.37213028 851.239805944198
13.39813028 843.319184284794
13.42413028 833.298023610067
13.45013028 856.920037789991
13.47613028 785.999119428775
13.50213028 751.692889558471
13.52813028 762.586376519315
13.55413028 781.312500595839
13.58013028 797.328396912193
13.60613028 813.983748851078
13.63213028 822.862403993478
13.65813028 826.443516154255
13.68413028 826.798086508007
13.71013028 798.812415142926
13.73613028 798.014476985771
13.76213028 813.855949341257
13.78813028 817.68380272701
13.81413028 800.254260374998
13.84013028 788.789960933493
13.86613028 797.846507677176
13.89213028 801.435264783969
13.91813028 794.371782759565
13.94413028 775.453186855131
13.97013028 806.26303748389
13.99613028 851.518110764925
14.02213028 791.060198310684
14.04813028 742.481785994159
14.07413028 789.318852007255
14.10013028 814.251399158965
14.12613028 791.005722431957
14.15213028 777.602398631498
14.17813028 791.299465495515
14.20413028 789.962336584533
14.23013028 773.933405167908
14.25613028 761.469334763195
14.28213028 777.264456814313
14.30813028 786.593518281752
14.33413028 756.410888060587
14.36013028 773.772748527572
14.38613028 785.662767848107
14.41213028 784.982890834934
14.43813028 763.373579477688
14.46413028 777.770974364526
14.49013028 811.946440268231
14.51613028 783.474199179009
14.54213028 730.290985088438
14.56813028 751.217580771555
14.59413028 767.312500595892
14.62013028 768.543551986171
14.64613028 726.45270622663
14.67213028 709.254282930022
14.69813028 721.004177305599
14.72413028 706.530894273496
14.75013028 711.637704014507
14.77613028 779.420536206384
14.80213028 735.605614680047
14.82813028 726.041234296685
14.85413028 718.722678991241
14.88013028 752.906247914378
14.90613028 712.134276717017
14.93213028 759.2468670208
14.95813028 765.360418581536
14.98413028 737.76589393269
15.01013028 683.403746298148
15.03613028 751.790064174405
15.06213028 727.62462380409
15.08813028 725.54096491703
15.11413028 761.944769345991
15.14013028 758.281498314358
15.16613028 702.09696813417
15.19213028 732
15.21813028 731.735794777396
15.24413028 714.994380808851
15.27013028 714.004303101432
15.29613028 696.256057093119
15.32213028 698.927556940069
15.34813028 698.034069979225
15.37413028 748.668409594184
15.40013028 703.695728219426
15.42613028 716.914773431508
15.45213028 711.516314046814
15.47813028 705.5020886528
15.50413028 769.354134835243
15.53013028 714.143295883404
15.55613028 738.91586048439
15.58213028 707.934824498385
15.60813028 683.065736815947
15.63413028 703.989974466515
15.66013028 672.431774588585
15.68613028 746.346260852545
15.71213028 746.286659431933
15.73813028 711.133270350019
15.76413028 681.39914649486
15.79013028 723.835062813263
15.81613028 683.248973461443
15.84213028 714.089574780021
15.86813028 721.627610816
15.89413028 687.424839307816
15.92013028 738.306445886336
15.94613028 727.27815646988
15.97213028 718.911179995217
15.99813028 702.77105505036
16.02413028 669.805834694827
16.05013028 691.109293569301
16.07613028 673.347131889451
16.10213028 680.70187314908
16.12813028 693.673044973215
16.15413028 693.683322098509
16.18013028 693.648416658164
16.20613028 672.291191570201
16.23213028 681.371450482025
16.25813028 686.57620263497
16.28413028 707.566554489081
16.31013028 703.6406233613
16.33613028 724.155208355109
16.36213028 695.893545091655
16.38813028 663.1213448576
16.41413028 684.332596772817
16.44013028 672.737088311992
16.46613028 681.659929187058
16.49213028 677.356447757656
16.51813028 650.480573145397
16.54413028 657.642568430324
16.57013028 659.504595036159
16.59613028 683.379598611513
16.62213028 709.682360841507
16.64813028 712.986861658724
16.67413028 691.647055458496
16.70013028 629.451722414605
16.72613028 623.402910837032
16.75213028 657
16.77813028 646.494901780315
16.80413028 647.180420539615
16.83013028 660.592453783803
16.85613028 648.780874102085
16.88213028 651.522059033844
16.90813028 654.370592465879
16.93413028 647.786596534044
16.96013028 646.223932182919
16.98613028 662.56926735425
17.01213028 661.279872502076
17.03813028 672.790189970285
17.06413028 673.465409049358
17.09013028 677.954543287666
17.11613028 642.137218618877
17.14213028 622.156124502064
17.16813028 630.312042522418
17.19413028 664.013286691995
17.22013028 667.417652435381
17.24613028 631.832053246375
17.27213028 656.730575528962
17.29813028 683.45604807111
17.32413028 662.305313723408
17.35013028 647.721546828225
17.37613028 624.98354236936
17.40213028 662.084139515612
17.42813028 635.007748186819
17.45413028 619.435664726634
17.48013028 661.324677680071
17.50613028 648.72526606043
17.53213028 634.033382868925
17.55813028 661.976058795071
17.58413028 624.986484271177
17.61013028 616.486547169117
17.63613028 616.360108858966
17.66213028 659.414229905067
17.68813028 662.322755166067
17.71413028 642.575034896167
17.74013028 666.212316413074
17.76613028 669.870529567939
17.79213028 665.03916343178
17.81813028 609.025737923049
17.84413028 651.82593087175
17.87013028 639.131770333707
17.89613028 676.754723215607
17.92213028 661.26203111675
17.94813028 637.63118169722
17.97413028 649.529120110447
18.00013028 634.738301160755
18.02613028 632.112132230258
18.05213028 622.659884077103
18.07813028 627.544535798249
18.10413028 628.914167007041
18.13013028 600.968413849111
18.15613028 614.992126017302
18.18213028 626.728401423198
18.20813028 592.146408691196
18.23413028 623.311332857178
18.26013028 600.797102695981
18.28613028 597.68942191803
18.31213028 623.878448660683
18.33813028 582.807483062044
18.36413028 573.814944081311
18.39013028 592.515501140765
18.41613028 583.483308565495
18.44213028 562.726101521474
18.46813028 557.224745089016
18.49413028 581.490643788884
18.52013028 617.7055923812
18.54613028 596.434990637181
18.57213028 620.571589810922
18.59813028 616.310200694244
18.62413028 582.086874935627
18.65013028 589.350770435739
18.67613028 580.994838882376
18.70213028 598.008399721246
18.72813028 604.267776103822
18.75413028 598.669451537066
18.78013028 585.844814199912
18.80613028 592.279037040967
18.83213028 574.818973036008
18.85813028 576.034092534247
18.88413028 581.301010621928
18.91013028 549.88435501933
18.93613028 548.302955690956
18.96213028 578.188671909959
18.98813028 585.808718465748
19.01413028 602.407923603751
19.04013028 614.658213154864
19.06613028 569.330709834599
19.09213028 575.358231455012
19.11813028 573.041773055992
19.14413028 548.828230773397
19.17013028 557.999999999925
19.19613028 559.989722874799
19.22213028 556.637407312701
19.24813028 554.820689068292
19.27413028 558.532336159045
19.30013028 579.056111225176
19.32613028 594.147976372501
19.35213028 556.601976133813
19.37813028 526.139873353143
19.40413028 535.270785670706
19.43013028 546.448780512793
19.45613028 557.167740271911
19.48213028 559.069433493045
19.50813028 553.323990569781
19.53413028 551.525481564158
19.56013028 540.057782147416
19.58613028 560.725266060433
19.61213028 537.823756765986
19.63813028 525.533800599571
19.66413028 549.463612331237
19.69013028 548.497156571841
19.71613028 532.474621676698
19.74213028 548.843749702055
19.76813028 551.024525074286
19.79413028 555.923460320304
19.82013028 540.223096721799
19.84613028 558.49874680832
19.87213028 567.662435570436
19.89813028 577.539684403195
19.92413028 529.219606526415
19.95013028 544.468212134529
19.97613028 593.206903703687
20.00213028 565.254008783235
20.02813028 541.761487590397
20.05413028 530.229906206568
20.08013028 543.118690123337
20.10613028 526.048043781526
20.13213028 519.627530130166
20.15813028 545.39388213638
20.18413028 534.019180029972
20.21013028 576.564002995768
20.23613028 561.782751505966
20.26213028 535.809118408492
20.28813028 558.028612159797
20.31413028 492.052391993055
20.34013028 518.63490092934
20.36613028 513.712985735398
20.39213028 528.10714201849
20.41813028 553.036428011681
20.44413028 524.163837113096
20.47013028 577.550464711921
20.49613028 538.006580448102
20.52213028 542.956968985194
20.54813028 511.592911857368
20.57413028 551.805066898779
20.60013028 486.647742568641
20.62613028 463.062498212327
20.65213028 518.506940047849
20.67813028 525.727440166197
20.70413028 547.204568226256
20.73013028 544.43992271807
20.75613028 514.230925594451
20.78213028 514.568683484823
20.80813028 522.940237207772
20.83413028 528.361631430299
20.86013028 474.668548410872
20.88613028 467.704963401793
20.91213028 492.434222841137
20.93813028 516.15065366187
20.96413028 551.263163279698
20.99013028 503.542900451796
21.01613028 511.874626187705
21.04213028 526.515375344885
21.06813028 531.349076958476
21.09413028 506.487589111951
21.12013028 484.499559714416
21.14613028 504.104280802515
21.17213028 510.513327035002
21.19813028 519.534384468927
21.22413028 522.276508102664
21.25013028 499.165772647857
21.27613028 530.811544106028
21.30213028 516.0886490988
21.32813028 495.845775456846
21.35413028 474.805228270443
21.38013028 479.279162836929
21.40613028 497.772645286768
21.43213028 496.914750876484
21.45813028 500.610295169221
21.48413028 485.647661882811
21.51013028 495.502133762846
21.53613028 521.088487727137
21.56213028 514.731949749393
21.58813028 529.552351650136
21.61413028 558.493150172243
21.64013028 547.799002654961
21.66613028 543.541445545456
21.69213028 538.377734228318
21.71813028 534.489556736002
21.74413028 541
21.77013028 528.637029925055
21.79613028 547.817289093008
21.82213028 538.872945731196
21.84813028 521.811773142691
21.87413028 515.572186701039
21.90013028 507.137663671593
21.92613028 531.899690021302
21.95213028 506.944953272681
21.97813028 498.558325673858
22.00413028 496.153905286251
22.03013028 470.238512409537
22.05613028 492.803270180653
22.08213028 513.792112484287
22.10813028 508.435722857447
22.13413028 516.058159535058
22.16013028 530.249557330852
22.18613028 512.978278010886
22.21213028 524.071104415215
22.23813028 512.346089946616
22.26413028 509.447796700768
22.29013028 494.833220985091
22.31613028 492.90808974255
22.34213028 503.406333367344
22.36813028 510.607330712386
22.39413028 529.230112688283
22.42013028 519.596402052754
22.44613028 509.914270247984
22.47213028 505.697215214975
22.49813028 511.219916248987
22.52413028 483.909509073026
22.55013028 483.520720389136
22.57613028 479.09377464064
22.60213028 507.035844142324
22.62813028 490.495485649676
22.65413028 478.288398019298
22.68013028 512.839217563836
22.70613028 506.735120687937
22.73213028 454.959978552016
22.75813028 477.108835495825
22.78413028 500.798122083793
22.81013028 449.492817894648
22.83613028 482.133521941779
22.86213028 476.770974364528
22.88813028 496.096281024005
22.91413028 527.136028325069
22.94013028 515.902070608782
22.96613028 500.823905116891
22.99213028 496.878151958876
23.01813028 475.427390801271
23.04413028 487.244050914868
23.07013028 527.707379565058
23.09613028 461.136302471861
23.12213028 475.987468083139
23.14813028 473.032273261104
23.17413028 482.79319953717
23.20013028 451.979274843667
23.22613028 506.649571376121
23.25213028 453.92592159361
23.27813028 505.498585436659
23.30413028 458.795741496247
23.33013028 489.951875532641
23.35613028 482.991497037896
23.38213028 498.198949035156
23.40813028 507.120154563861
23.43413028 478.076701051363
23.46013028 441.803534793178
23.48613028 454.205048854697
23.51213028 451.898019099063
23.53813028 477.893051442389
23.56413028 463.898832005156
23.59013028 450.15324073106
23.61613028 442.32551314119
23.64213028 473.028747489874
23.66813028 473.882832447999
23.69413028 439.203287712422
23.72013028 450.044747047094
23.74613028 457.522059033844
23.77213028 487.293181749278
23.79813028 494.035260272964
23.82413028 482.762323051453
23.85013028 479.721340346596
23.87613028 465.060220865705
23.90213028 473.029915228649
23.92813028 484.532587750807
23.95413028 483.591744118653
23.98013028 476.626168930498
24.00613028 479.95625931989
24.03213028 484.303768597049
24.05813028 467.025063833596
24.08413028 431.718411465542
24.11013028 446.861636197433
24.13613028 443.57317051306
24.16213028 461.920460287686
24.18813028 469.968288053165
24.21413028 457.505430497279
24.24013028 442.404868926819
24.26613028 427.936747012388
24.29213028 451.633068635435
24.31813028 462.60247931733
24.34413028 468.451686838821
24.37013028 452.71790828196
24.39613028 421.896222380942
24.42213028 456.231793144853
24.44813028 469.836746756263
24.47413028 438.235125455074
24.50013028 429.580150903832
24.52613028 429.85344295784
24.55213028 437.894699809607
24.57813028 436.573193068086
24.60413028 453.750007150699
24.63013028 470.08743625004
24.65613028 448.378740595365
24.68213028 446.711979368346
24.70813028 431.818285925732
24.73413028 424.624246416497
24.76013028 426.847743080962
24.78613028 445.728275627317
24.81213028 440.978336141692
24.83813028 436.541571341412
24.86413028 443.315694089466
24.89013028 430.702205426613
24.91613028 419.507788529737
24.94213028 406.178268988872
24.96813028 427.429816498799
24.99413028 446.867645796935
25.02013028 429.655535865573
25.04613028 423.27912726115
25.07213028 456.405510926924
25.09813028 405.490140605359
25.12413028 419.462844535189
25.15013028 460.675677152549
25.17613028 455.033773277414
25.20213028 423.740807544115
25.22813028 417.931882596574
25.25413028 428.515707622423
25.28013028 423.229299782258
25.30613028 429.331383924053
25.33213028 425.703831238864
25.35813028 400.937879175317
25.38413028 419.106696965848
25.41013028 391.528078167612
25.43613028 416.696482994657
25.46213028 422.636949239224
25.48813028 428
25.51413028 428.086313621374
25.54013028 430.145869931888
25.56613028 441.740052768826
25.59213028 411.13093487253
25.61813028 429.487131038475
25.64413028 418.265956830677
25.67013028 399.642716781229
25.69613028 422.629133387334
25.72213028 401.117899772264
25.74813028 417.949220798377
25.77413028 448.599811562306
25.80013028 425.547958328502
25.82613028 419.19652333763
25.85213028 427.615914360321
25.87813028 422.315590848609
25.90413028 381.688392996034
25.93013028 378.072443059931
25.95613028 359.647307050255
25.98213028 433.340125457109
26.00813028 410.475137880986
26.03413028 395.457718993349
26.06013028 386.976436182714
26.08613028 396.416278214951
26.11213028 422.026824975934
26.13813028 419.214571204671
26.16413028 376.087184658226
26.19013028 430.953385083211
26.21613028 412.900354576494
26.24213028 371.234954549146
26.26813028 398.935521142863
26.29413028 412.731869063559
26.32013028 414
26.34613028 382.479189390653
26.37213028 411.70277627527
26.39813028 416.510443263998
26.42413028 416.217100143056
26.45013028 409.70888911563
26.47613028 412.753510366844
26.50213028 394.431271405057
26.52813028 392.294097896177
26.55413028 387.416358900783
26.58013028 400.987490638226
26.60613028 411.008731998842
26.63213028 396.168279031219
26.65813028 406.19251693796
26.68413028 389.767771336638
26.71013028 381.928769788831
26.73613028 389.099829350197
26.76213028 401.370740816784
26.78813028 389.996361453711
26.81413028 384.492188915242
26.84013028 400.025257294552
26.86613028 393.170785414524
26.89213028 390.9669138328
26.91813028 391.944391958347
26.94413028 384.297062353066
26.97013028 387.306652368053
26.99613028 383.668112892421
27.02213028 390.813798897621
27.04813028 406.502695077126
27.07413028 402.599263268733
27.10013028 396.518946226103
27.12613028 387.990764817633
27.15213028 389.14660215215
27.17813028 413.184746196118
27.20413028 423.58635396429
27.23013028 401.605192182352
27.25613028 376.206319834331
27.28213028 383.347931774783
27.30813028 380.112877471278
27.33413028 380.340251253046
27.36013028 415.635920317147
27.38613028 408.132525108997
27.41213028 447.565409305425
27.43813028 457.748865453505
27.46413028 438.659242076937
27.49013028 444.727933815458
27.51613028 420.569586611085
27.54213028 454.809370000259
27.56813028 469.58037994057
27.59413028 466.047711503867
27.62013028 479.195629745699
27.64613028 501.908799407787
27.67213028 500.430916572442
27.69813028 490.343754469185
27.72413028 521.801725054297
27.75013028 543.698989377999
27.77613028 550.907631669073
27.80213028 564.589570012889
27.82813028 550.57739292871
27.85413028 567.810260105694
27.88013028 660.432610049704
27.90613028 657.326209785671
27.93213028 697.163540411192
27.95813028 692.31612960792
27.98413028 671.058707828631
28.01013028 737.019809009377
28.03613028 776.37155372288
28.06213028 785.835736902714
28.08813028 845.448412659414
28.11413028 903.728446533121
28.14013028 948.852303821951
28.16613028 1171.74330695446
28.19213028 1437.70065240204
28.21813028 2097.95432029868
28.24413028 2240.84737359148
28.27013028 1589.09578132697
28.29613028 1472.98093018369
28.32213028 1188.35287780167
28.34813028 742.263305582909
28.37413028 589.791338640472
28.40013028 513.159685849017
28.42613028 451.548955161344
28.45213028 421.047163210356
28.47813028 393.255176521949
28.50413028 419.412249260201
28.53013028 373.298288222593
28.55613028 400.538377847836
28.58213028 390.183236645545
28.60813028 398.961168845817
28.63413028 369.548290606156
28.66013028 374.85716218997
28.68613028 396.143260307668
28.71213028 383.414310590899
28.73813028 400.686834848919
28.76413028 403.153972951324
28.79013028 377.916857317174
28.81613028 368.042905218924
28.84213028 355.572357606918
28.86813028 353.806337878349
28.89413028 365.946233786516
28.92013028 353.270134136276
28.94613028 380.062840024185
28.97213028 368.300484883378
28.99813028 378.647981139712
29.02413028 365.329896928454
29.05013028 342.051717903602
29.07613028 361.443583819381
29.10213028 368.13185101954
29.12813028 357.100390664532
29.15413028 378.79612841822
29.18013028 366.632807509405
29.20613028 342.453038504177
29.23213028 363.364457070493
29.25813028 342.152315049844
29.28413028 320.114512817736
29.31013028 366.462076739145
29.33613028 370.146008748527
29.36213028 342.408084975416
29.38813028 358.923573095375
29.41413028 370.814211861048
29.44013028 365.059762792228
29.46613028 362.421874851027
29.49213028 362
29.51813028 342.460180266661
29.54413028 337.967165424562
29.57013028 337.308152384318
29.59613028 322.657835767222
29.62213028 325.297462295732
29.64813028 326.387301688276
29.67413028 334.463657441287
29.70013028 342.645281295397
29.72613028 333.60548888417
29.75213028 323.496321110794
29.77813028 335.198536071728
29.80413028 352.262969818816
29.83013028 348.831343581137
29.85613028 339.116241870784
29.88213028 318
29.90813028 315.952769124528
29.93413028 329.780003065177
29.96013028 346.039163431779
29.98613028 330.860962107977
30.01213028 324.562915942886
30.03813028 319.159008273068
30.06413028 335.246934685872
30.09013028 352.900148094732
30.11613028 343
30.14213028 334.676215911858
30.16813028 320.412455741971
30.19413028 322.894883736296
30.22013028 317.969087938566
30.24613028 340.328671058981
30.27213028 346.425045789531
30.29813028 322.351434990931
30.32413028 311.498621012439
30.35013028 318.66761924316
30.37613028 341.152256919036
30.40213028 325
30.42813028 322.256995795096
30.45413028 309.989219691233
30.48013028 302.955778691454
30.50613028 312.074536479861
30.53213028 332.77295500934
30.55813028 320.870277976177
30.58413028 313.030934616459
30.61013028 304.972429783046
30.63613028 321.552158189141
30.66213028 312.36509907066
30.68813028 314.888222602362
30.71413028 314
30.74013028 310.78235156337
30.76613028 281.050262997339
30.79213028 305.081323409637
30.81813028 318.502672522158
30.84413028 311.41794913719
30.87013028 319.042321349567
30.89613028 320.129596227942
30.92213028 323.910092942384
30.94813028 319.723801619907
30.97413028 298.034218330089
31.00013028 310.905228526528
31.02613028 304.120486841457
31.05213028 329.294497838898
31.07813028 300.14876672365
31.10413028 327.590621489988
31.13013028 328.056901576249
31.15613028 356.928460066264
31.18213028 296.218738975962
31.20813028 355.846539766462
31.23413028 343.931814931501
31.26013028 355.40230441265
31.28613028 376.438422701759
31.31213028 382.494569502721
31.33813028 375.226519252112
31.36413028 374.853797790466
31.39013028 393.565260954578
31.41613028 369.479544223325
31.44213028 335.158918052973
31.46813028 349.352715504766
31.49413028 349.174882034346
31.52013028 340.057359649724
31.54613028 317.607114696361
31.57213028 322.067452848236
31.59813028 333.40946873011
31.62413028 341.282024052908
31.65013028 334.064169134565
31.67613028 299.406597979865
31.70213028 314.817895517389
31.72813028 337.153056804327
31.75413028 313.801463928273
31.78013028 305.475205546058
31.80613028 327.5535644989
31.83213028 326.196855615225
31.85813028 321
31.88413028 323.621407755497
31.91013028 306.9279699035
31.93613028 314.794205904216
31.96213028 314.365053960613
31.98813028 308.615662768559
32.01413028 301.125373812295
32.04013028 304.341454567542
32.06613028 334.021731523379
32.09213028 329.68897686539
32.11813028 306.075281720886
32.14413028 325.581934601199
32.17013028 363.478615055508
32.19613028 369.419449153502
32.22213028 364.105448541299
32.24813028 366.516439842743
32.27413028 387.767219556623
32.30013028 388.136189696807
32.32613028 381.140170054956
32.35213028 413.116525551833
32.37813028 467.078471727972
32.40413028 524.733149577394
32.43013028 561.303481429507
32.45613028 594.734214075253
32.48213028 647.462579922679
32.50813028 749.827585286513
32.53413028 840.14589248691
32.56013028 913.195339091625
32.58613028 1086.58960814993
32.61213028 1347.26729455003
32.63813028 2237.51234813104
32.66413028 4587.80785816987
32.69013028 5466.97730693767
32.71613028 2712.3640503691
32.74213028 2488.63065830554
32.76813028 3062.09278499503
32.79413028 1656.18885605101
32.82013028 700.135025444564
32.84613028 568.054160108375
32.87213028 433.33460345903
32.89813028 365.441180676877
32.92413028 385.067681884974
32.95013028 385.532165253119
32.97613028 369.715846951376
33.00213028 371.542613284246
33.02813028 359.717759931114
33.05413028 319.65841963658
33.08013028 308.790338321191
33.10613028 315.621991624899
33.13213028 314.895409474846
33.15813028 316.970084771348
33.18413028 307.636949239224
33.21013028 311.149315017225
33.23613028 314.787854492767
33.26213028 327.209594013738
33.28813028 295.478192557918
33.31413028 300.425136009674
33.34013028 309.008893370512
33.36613028 284.334312805106
33.39213028 311.194358766125
33.41813028 345.692089673134
33.44413028 313.379611632271
33.47013028 287.549171177323
33.49613028 279.76322617771
33.52213028 298.514207606172
33.54813028 314.451219231081
33.57413028 288.010402921004
33.60013028 289.009612570005
33.62613028 308.811166718376
33.65213028 280.561554743216
33.67813028 275.146431246222
33.70413028 295.176620621659
33.73013028 276.98261668815
33.75613028 286.350415603122
33.78213028 290.724098321717
33.80813028 315.869761771894
33.83413028 292.486960132546
33.86013028 299.012577026848
33.88613028 318.718043612164
33.91213028 298.083258944438
33.93813028 305.457889899279
33.96413028 278.568238432096
33.99013028 326.802066866143
34.01613028 319.165521056099
34.04213028 301.859371871573
34.06813028 303.10939681016
34.09413028 300.752171722198
34.12013028 294.385756561919
34.14613028 296.960562421437
34.17213028 307.386282300467
34.19813028 306.910928403503
34.22413028 299.90123514766
34.25013028 311.543619651298
34.27613028 320.455006128276
34.30213028 328.593208559181
34.32813028 322.32812276532
34.35413028 327.552809723613
34.38013028 315.53813927684
34.40613028 302.763993973758
34.43213028 331.416494230921
34.45813028 333.212145507145
34.48413028 350.872416506152
34.51013028 333.605982533475
34.53613028 312.853775235494
34.56213028 299.86630715229
34.58813028 300.857768614405
34.61413028 331.380982366204
34.64013028 317.2169648129
34.66613028 289.282333775401
34.69213028 320.775893424652
34.71813028 324.047118100315
34.74413028 318.277995098214
34.77013028 323.676135226026
34.79613028 300.869958719341
34.82213028 288.273063017327
34.84813028 301.435790522519
34.87413028 301.257099035955
34.90013028 311.157175979165
34.92613028 316.144463622172
34.95213028 297.185743028903
34.97813028 294.796792973411
35.00413028 307.828859752804
35.03013028 309.359663806163
35.05613028 294.551677560685
35.08213028 296.393469172951
35.10813028 302.600098729853
35.13413028 298.415065366187
35.16013028 289.68170930708
35.18613028 289.042285773785
35.21213028 302.449925696485
35.23813028 288.996990433115
35.26413028 296.059978808204
35.29013028 315.933405167908
35.31613028 310.889516136958
35.34213028 305.335687025534
35.36813028 315.772941988488
35.39413028 345.159430770756
35.42013028 352.763194088432
35.44613028 321.448025737507
35.47213028 326.445551443424
35.49813028 365.246912130848
35.52413028 388.318084211211
35.55013028 412.20583920583
35.57613028 403.0578177232
35.60213028 398.330387091268
35.62813028 434.233257585391
35.65413028 481.848726892989
35.68013028 504.65357777579
35.70613028 505.293527047632
35.73213028 484.989642188834
35.75813028 492.515159328914
35.78413028 472.344257652709
35.81013028 492.402398119252
35.83613028 450.083317075252
35.86213028 400.667600174645
35.88813028 341.363405593396
35.91413028 335.826034112609
35.94013028 325.60283414995
35.96613028 314.390208014305
35.99213028 319.051556531935
36.01813028 328.135021958085
36.04413028 305.186578490023
36.07013028 293.6528230005
36.09613028 289.629978382633
36.12213028 322.456218977038
36.14813028 333.297601112379
36.17413028 309.617904539395
36.20013028 342.933989037267
36.22613028 335.013367377918
36.25213028 424.945017451246
36.27813028 424.043031014806
36.30413028 430.779935400108
36.33013028 477.014715556829
36.35613028 433.461554487093
36.38213028 419.734456132751
36.40813028 411.569015762487
36.43413028 369.647216830156
36.46013028 358.727772443694
36.48613028 329.228603137785
36.51213028 310.883874390833
36.53813028 309.879261566781
36.56413028 290.005196693409
36.59013028 296.453586797797
36.61613028 258.923244304322
36.64213028 262.914441153912
36.66813028 290.719153220073
36.69413028 301.738094679041
36.72013028 271.417584770303
36.74613028 245.602685799045
36.77213028 274.178359208975
36.79813028 283.780038640965
36.82413028 300.172443315979
36.85013028 282.954372381745
36.87613028 255.742662393048
36.90213028 246.778951588083
36.92813028 229.930602082739
36.95413028 265.7892833576
36.98013028 283.421165185788
37.00613028 251.068965885302
37.03213028 266.701734332433
37.05813028 268.426132842457
37.08413028 253.60749208405
37.11013028 254.287769039891
37.13613028 251.140560463358
37.16213028 263.387037075758
37.18813028 255.588689441653
37.21413028 249.106409798299
37.24013028 244.886403329219
37.26613028 272.274743473828
37.29213028 263.424245904251
37.31813028 244.163185578667
37.34413028 264.436796889572
37.37013028 267.765035916592
37.39613028 260.655477734767
37.42213028 253.329542095884
37.44813028 266.215290404181
37.47413028 268.860288018521
37.50013028 244.245128433484
37.52613028 232.995571102575
37.55213028 236.430629404893
37.57813028 238.105780818895
37.60413028 252.953007695571
37.63013028 256.349089979242
37.65613028 237.452602985773
37.68213028 244.640210397868
37.70813028 244.344831987804
37.73413028 242.302394376618
37.76013028 243.438413167494
37.78613028 233.044872842974
37.81213028 246.716830763402
37.83813028 245.187620432853
37.86413028 237.344818967046
37.89013028 257.445861165937
37.91613028 264.458738381163
37.94213028 251.808408743257
37.96813028 262.000606424381
37.99413028 264
38.02013028 270.901199571874
38.04613028 292.075371940984
38.07213028 292.776916298964
38.09813028 263.83924011886
38.12413028 267.437977649044
38.15013028 266.714621081855
38.17613028 290.491685731718
38.20213028 285.336477376604
38.22813028 280.092126273428
38.25413028 283.619511282989
38.28013028 237.079994299299
38.30613028 269.090903890404
38.33213028 253.892467573034
38.35813028 264.08956524576
38.38413028 238
38.41013028 239.648565009069
38.43613028 255.43684199962
38.46213028 292.809737853638
38.48813028 268.05605658086
38.51413028 228.873494024775
38.54013028 225.494556481966
38.56613028 257.5775768554
38.59213028 238.431006792471
38.61813028 254.56434480762
38.64413028 280.866661984912
38.67013028 265.359160622729
38.69613028 243.894183605319
38.72213028 275.587899090651
38.74813028 267.071733394693
38.77413028 268.870277976176
38.80013028 264.25635379493
38.82613028 279.932901984382
38.85213028 269.042047202781
38.87813028 270.972510468877
38.90413028 259.284004697718
38.93013028 268.664106492754
38.95613028 250.826721222821
38.98213028 247.160301807597
39.00813028 271.352738059786
39.03413028 266.512949647358
39.06013028 246.747217086291
39.08613028 244.093123106214
39.11213028 262.836046625282
39.13813028 258.790773839643
39.16413028 251.860229887715
39.19013028 239.726559595029
39.21613028 257.717104910192
39.24213028 249.137196063853
39.26813028 228.576741394276
39.29413028 277.959907400514
39.32013028 266.107864704555
39.34613028 239.19334286475
39.37213028 253.145560209316
39.39813028 248.546287406322
39.42413028 248.333661270675
39.45013028 242.856281618853
39.47613028 271.321700202475
39.50213028 256.312032988155
39.52813028 272.360531356658
39.55413028 262.064833689758
39.58013028 244.224699978966
39.60613028 259.127638138154
39.63213028 253.029825008551
39.65813028 232.539684403195
39.68413028 242.966604110164
39.71013028 269.056030539344
39.73613028 255.600134305641
39.76213028 236.213232560027
39.78813028 253.725149798812
39.81413028 266.629052701501
39.84013028 248.426087732413
39.86613028 249.184162326762
39.89213028 258.797857471269
39.91813028 248.212729376501
39.94413028 251.588824771865
39.97013028 252.596253701846
39.99613028 245.32121003971
40.02213028 252.794789773579
40.04813028 245.966446224996
40.07413028 231.350851121574
40.10013028 239.398149662071
40.12613028 254.099851905221
40.15213028 255.999622612356
40.17813028 250.059156367846
40.20413028 249.401091563888
40.23013028 250.589111939413
40.25613028 245.317010179085
40.28213028 235.144131344576
40.30813028 240.775345131085
40.33413028 261.736675348564
40.36013028 252.434671380342
40.38613028 250.305826441198
40.41213028 268.379840668934
40.43813028 241.099716575084
40.46413028 224.809953869615
40.49013028 233.968584755038
40.51613028 236.471944387412
40.54213028 249.912653970048
40.56813028 261.497708351983
40.59413028 228.284598101337
40.62013028 254.965310575633
40.64613028 263.538426444376
40.67213028 242.937192065104
40.69813028 255.499662955271
40.72413028 252.071904300623
40.75013028 262.281498314288
40.77613028 256.571567255894
40.80213028 262.008022333603
40.82813028 267.420832908192
40.85413028 269.195975044057
40.88013028 252.666864467872
40.90613028 259.66451945618
40.93213028 244.725782264721
40.95813028 228.853704083925
40.98413028 266
41.01013028 266.690508970993
41.03613028 264.468031694337
41.06213028 238.444522521362
41.08813028 248.999932334923
41.11413028 233.127009158685
41.14013028 247.246031559681
41.16613028 249.904747898068
41.19213028 259.269766282897
41.21813028 277.228270860187
41.24413028 259.916673390486
41.27013028 258.926595683068
41.29613028 258.444374170456
41.32213028 262.482692606852
41.34813028 220.967345864761
41.37413028 284.685109282368
41.40013028 246.405178649387
41.42613028 222.665786949255
41.45213028 269.91313808505
41.47813028 248.131428521848
41.50413028 276.539006827173
41.53013028 259.464734959908
41.55613028 262.857036394139
41.58213028 305.945156267901
41.60813028 281.556393625594
41.63413028 270.655077792098
41.66013028 262.603440574332
41.68613028 257.426761821865
41.71213028 282.33230960527
41.73813028 259.945514587011
41.76413028 278.237138189173
41.79013028 260.000996832782
41.81613028 278.625904317976
41.84213028 288.840911041022
41.86813028 275.631743011554
41.89413028 285.529039424613
41.92013028 269.842365947366
41.94613028 288.831891874709
41.97213028 309.304545927357
41.99813028 348.801105609155
42.02413028 348.572106015203
42.05013028 351.430148776393
42.07613028 387.461596110648
42.10213028 443.353457259295
42.12813028 516.185555615731
42.15413028 667.016253710201
42.18013028 645.744336801763
42.20613028 498.24569672068
42.23213028 386.434845772778
42.25813028 343.983784426867
42.28413028 326.703476406244
42.31013028 317.940924317988
42.33613028 330.66498706392
42.36213028 288.749897862083
42.38813028 284.98935502142
42.41413028 292.542235896603
42.44013028 291.880703452283
42.46613028 281.894380552773
42.49213028 289.569357574348
42.51813028 308.554148368262
42.54413028 303.255760391307
42.57013028 287.495234057832
42.59613028 272.354754280389
42.62213028 277.821237361866
42.64813028 261.718905114811
42.67413028 259.35361863096
42.70013028 261.752687926486
42.72613028 260.908386444361
42.75213028 265.905996322618
42.77813028 260
42.80413028 273.663693529322
42.83013028 274.136063900921
42.85613028 263.2133002251
42.88213028 274.415110476237
42.90813028 286.034698958552
42.93413028 274.341651514996
42.96013028 255.570731794775
42.98613028 243.514278757743
43.01213028 229.354992851389
43.03813028 236.810492628925
43.06413028 237.053959674438
43.09013028 253.713408233087
43.11613028 262.466176845404
43.14213028 255.512994757406
43.16813028 256.509230415234
43.19413028 260.174639976847
43.22013028 277.695373386806
43.24613028 259.269666528535
43.27213028 232.784490093288
43.29813028 241.994654955683
43.32413028 244.946395158184
43.35013028 250.099529161879
43.37613028 282.796931790054
43.40213028 262.622907771854
43.42813028 253.249854032661
43.45413028 254.239931740079
43.48013028 257.530103922472
43.50613028 261.158082591848
43.53213028 241.478021651989
43.55813028 237.60679195308
43.58413028 260.951601385856
43.61013028 265.901989922948
43.63613028 267.272388927804
43.66213028 252.073359206885
43.68813028 243.807573282135
43.71413028 259.346934941999
43.74013028 288.468763914602
43.76613028 265
43.79213028 265.554709682591
43.81813028 268.989803560632
43.84413028 258.178052972898
43.87013028 242.43525176321
43.89613028 266.936131053734
43.92213028 226.754678105558
43.94813028 223.925347258523
43.97413028 240.999999999935
44.00013028 241.378763150388
44.02613028 253.389543459111
44.05213028 270.835933850165
44.07813028 256.97664266443
44.10413028 244.105632467988
44.13013028 252.837569196619
44.15613028 255.916089521129
44.18213028 257.924215095589
44.20813028 261.808741020852
44.23413028 261.057737037369
44.26013028 258.20297798985
44.28613028 258
44.31213028 264.387472594207
44.33813028 270.41544275383
44.36413028 258.5028790038
44.39013028 239.345415857162
44.41613028 243.982455316482
44.44213028 276.063846391235
44.46813028 265.646678070853
44.49413028 295.035521398993
44.52013028 273.507114440282
44.54613028 265.530413645043
44.57213028 298.3441995219
44.59813028 296.359789602128
44.62413028 285.272285687017
44.65013028 297.103113063871
44.67613028 266.962304495245
44.70213028 266.927602050046
44.72813028 269.246260596419
44.75413028 273.462902665997
44.78013028 245.644207263285
44.80613028 261.063010930112
44.83213028 283.85290419859
44.85813028 280.550464711921
44.88413028 282.553645184735
44.91013028 265.155782690206
44.93613028 246.558945118998
44.96213028 256.617652947634
44.98813028 262.036450566703
45.01413028 248.752710481507
45.04013028 260.405484885469
45.06613028 275.37324720007
45.09213028 285.377927689268
45.11813028 276.69208967314
45.14413028 281.089619890068
45.17013028 298.190846015718
45.19613028 332.756906855634
45.22213028 364.173885201557
45.24813028 405.317613116971
45.27413028 448.906509040402
45.30013028 476.386224169659
45.32613028 490.10210669682
45.35213028 493.031208763246
45.37813028 491.977271643833
45.40413028 504.377034097342
45.43013028 516.084974976589
45.45613028 488.252409012574
45.48213028 469.853865455589
45.50813028 507.820308194144
45.53413028 532.969329996063
45.56013028 542.193945802695
45.58613028 543.126990090221
45.61213028 529.320784055517
45.63813028 556.625836652903
45.66413028 533.225103408137
45.69013028 518.356718417945
45.71613028 561.896999711252
45.74213028 565.965530078106
45.76813028 564.352715504615
45.79413028 606.610988327188
45.82013028 640.702747672477
45.84613028 606.297768531801
45.87213028 675.812901819196
45.89813028 745.223016035966
45.92413028 762.946278896566
45.95013028 767.516075475862
45.97613028 754.821305026941
46.00213028 780.859623463332
46.02813028 778.86437161753
46.05413028 804.119041469457
46.08013028 856.035647194876
46.10613028 892.9750263865
46.13213028 922.833162854032
46.15813028 953.385304536185
46.18413028 1040.50836891259
46.21013028 1094.24166684088
46.23613028 1176.22042548027
46.26213028 1255.03977939042
46.28813028 1285.45452201327
46.31413028 1356.88731250319
46.34013028 1461.57861182524
46.36613028 1551.01676386671
46.39213028 1610.16708781225
46.41813028 1807.11750587738
46.44413028 1904.83021397948
46.47013028 2058.05599752486
46.49613028 2263.46708857997
46.52213028 2515.54383822853
46.54813028 2711.96622579731
46.57413028 2954.09670515772
46.60013028 3355.17700313178
46.62613028 3696.97077864013
46.65213028 4374.55424442157
46.67813028 5316.83076554513
46.70413028 6230.67248949246
46.73013028 6999.02495084408
46.75613028 8236.64973068313
46.78213028 10712.88243791
46.80813028 14630.743900212
46.83413028 22724.7314660521
46.86013028 40749.3466333014
46.88613028 82646.7702340447
46.91213028 124822.94147007
46.93813028 99231.1817554557
46.96413028 55099.8436021882
46.99013028 41361.0695255766
47.01613028 55031.9880934855
47.04213028 63751.7528550514
47.06813028 43843.5151657603
47.09413028 21919.2807007334
47.12013028 11090.7538519754
47.14613028 6624.80435994185
47.17213028 4540.79454906997
47.19813028 3370.9445544694
47.22413028 2690.6780119184
47.25013028 2271.10600821959
47.27613028 1830.23275973887
47.30213028 1473.65586302063
47.32813028 1259.40515353312
47.35413028 1116.03881557215
47.38013028 965.075175918773
47.40613028 881.558890474685
47.43213028 831.352593195385
47.45813028 855.730630173279
47.48413028 783.252951258376
47.51013028 754.99670326557
47.53613028 733.078991418746
47.56213028 682.684057805261
47.58813028 646.118245070447
47.61413028 623.300336532475
47.64013028 616.642442634444
47.66613028 625.222764444204
47.69213028 587.040734599653
47.71813028 570.802812107179
47.74413028 531.19073672709
47.77013028 512.856623430711
47.79613028 548.396717310842
47.82213028 535.912751163147
47.84813028 507.495485649672
47.87413028 512.850272019348
47.90013028 491.209355442727
47.92613028 459.533836175232
47.95213028 458.233751234644
47.97813028 452.730943382347
48.00413028 458.609446687338
48.03013028 474
48.05613028 465.777338796653
48.08213028 438.996980898858
48.10813028 437.089813351022
48.13413028 456.184323698426
48.16013028 442.900080429706
48.18613028 445.928905118983
48.21213028 444.247476931677
48.23813028 412.414229905067
48.26413028 419.873229412253
48.29013028 417.379669762963
48.31613028 390.310739453559
48.34213028 395.977955267549
48.36813028 410.686025429326
48.39413028 384.709392299155
48.42013028 396.687989566868
48.44613028 407.959007760814
48.47213028 393.574221990159
48.49813028 395.64488135273
48.52413028 388.576270300042
48.55013028 395.458051270944
48.57613028 385.003319289454
48.60213028 384.129767133873
48.62813028 390.222880705818
48.65413028 380.321151908797
48.68013028 389.26334720646
48.70613028 382.523055866632
48.73213028 369.354238076101
48.75813028 367.742262450381
48.78413028 346.852755847683
48.81013028 345.770542332576
48.83613028 326.695356879553
48.86213028 386.069343272952
48.88813028 370.145421392678
48.91413028 397.718734208878
48.94013028 359.731088246756
48.96613028 389.588005818005
48.99213028 330.632417100915
49.01813028 335.932489020953
49.04413028 346.305803886168
49.07013028 371.968952608419
49.09613028 352.913205750125
49.12213028 351.077536512483
49.14813028 340.669496647114
49.17413028 351.482711675378
49.20013028 376.235525397741
49.22613028 378.322839338391
49.25213028 310.063159281018
49.27813028 348.260073027055
49.30413028 362.985168181556
49.33013028 361.005012766719
49.35613028 345.19885881506
49.38213028 369.441225786833
49.40813028 328.3877502275
49.43413028 367.227786745185
49.46013028 350.990239079088
49.48613028 329.364883054683
49.51213028 321.503737020015
49.53813028 315.491308344074
49.56413028 338.613017568561
49.59013028 386.811805232048
49.61613028 356.466064070279
49.64213028 327.404069041483
49.66813028 324.86850381308
49.69413028 333.585815204982
49.72013028 318.026815441665
49.74613028 335.129686447949
49.77213028 355.576292855066
49.79813028 366.370031151544
49.82413028 362.337209596869
49.85013028 378.579050830186
49.87613028 386.156501889708
49.90213028 360.50709188526
49.92813028 325.305888058501
49.95413028 357.246005518168
49.98013028 350.514656145382
50.00613028 336.604859904807
50.03213028 325.974491113687
50.05813028 305.727933815453
50.08413028 322.421655348466
50.11013028 320.102977733724
50.13613028 322.588928012721
50.16213028 330.079881524177
50.18813028 334.680231845791
50.21413028 306.293894901012
50.24013028 325.461308943089
50.26613028 327.352431823716
50.29213028 332.498482195795
50.31813028 346.584018486861
50.34413028 313.979071848455
50.37013028 318.027086101963
50.39613028 329.502524171252
50.42213028 329.065301297497
50.44813028 321.1541343229
50.47413028 328.705556805411
50.50013028 332.184152792497
50.52613028 321.753591052677
50.55213028 321.124583461223
50.57813028 324.042447145448
50.60413028 309.660961595721
50.63013028 309.539990639267
50.65613028 328.914566949795
50.68213028 323.887777549647
50.70813028 329.034811733756
50.73413028 338.227893472542
50.76013028 323.030557228815
50.78613028 303.302797805784
50.81213028 312.779222248288
50.83813028 334.91797994585
50.86413028 327.714037212492
50.89013028 351.847433358394
50.91613028 341.465973850192
50.94213028 325.64481973543
50.96813028 379.853794304018
50.99413028 433.485811462363
51.02013028 457.891474226745
51.04613028 461.501604537809
51.07213028 470.051298892404
51.09813028 419.873332653111
51.12413028 430.189987999576
51.15013028 432.576534912449
51.17613028 419.674728916314
51.20213028 388.694838113998
51.22813028 352.814669934526
51.25413028 344.630804309574
51.28013028 325.333916348943
51.30613028 285.566006195603
51.33213028 287.33908351432
51.35813028 315.317342456681
51.38413028 316.467992632061
51.41013028 344.203358863989
51.43613028 309.170152948683
51.46213028 328.519659377835
51.48813028 282
51.51413028 282.656084159071
51.54013028 288.157382460876
51.56613028 296.828117998279
51.59213028 280.013812430634
51.61813028 293.372995608382
51.64413028 298.173781960703
51.67013028 314.686538147108
51.69613028 307.650010381066
51.72213028 268.539280974027
51.74813028 295.402236747578
51.77413028 288.259192455884
51.80013028 290.957359393597
51.82613028 272.145882952644
51.85213028 255.471311921513
51.87813028 295.974891056275
51.90413028 294.40772060854
51.93013028 256.136873320523
51.95613028 281.878893713398
51.98213028 297.766716373096
52.00813028 307.754974807368
52.03413028 286.757345860583
52.06013028 328.04872740524
52.08613028 284.604931056375
52.11213028 290.422274793694
52.13813028 303.036518231778
52.16413028 313.159637252473
52.19013028 323.966455759325
52.21613028 344.714621081852
52.24213028 354.089574779926
52.26813028 366.39156921397
52.29413028 363.668238688303
52.32013028 386.980039153221
52.34613028 413.855707283757
52.37213028 429.712195384326
52.39813028 416.293401251753
52.42413028 386.86429441819
52.45013028 397.136370136997
52.47613028 365.936566572189
52.50213028 334.964730192772
52.52813028 331.331154887316
52.55413028 325.862965307811
52.58013028 312.641894340868
52.60613028 303.769006740395
52.63213028 303.474724917557
52.65813028 310.546961495773
52.68413028 300.802196148536
52.71013028 294.584808837932
52.73613028 313.534852076667
52.76213028 313.059237053677
52.78813028 295.443425934215
52.81413028 292.339532053539
52.84013028 321.635332961297
52.86613028 299.708537769499
52.89213028 281.276279065926
52.91813028 298.333648249919
52.94413028 278.321842505539
52.97013028 277.642807001325
52.99613028 301.567457615364
53.02213028 310.588528070055
53.04813028 309.842788445054
53.07413028 302.175798181298
53.10013028 307.616462653892
53.12613028 302.827866406512
53.15213028 290.922166785706
53.17813028 277.833130764994
53.20413028 279.457728527611
53.23013028 285.908502705977
53.25613028 280.001545126358
53.28213028 301.997341779242
53.30813028 300.592708862065
53.33413028 277.225145031682
53.36013028 280.621385200517
53.38613028 270.45729649566
53.41213028 270.552648351949
53.43813028 267.66868722752
53.46413028 269.51154938541
53.49013028 298.720585571309
53.51613028 287.999932334927
53.54213028 282.900822184232
53.56813028 300.784957701094
53.59413028 306.301207569379
53.62013028 288.404730110179
53.64613028 302.204716577163
53.67213028 311.021412266462
53.69813028 305.727933815458
53.72413028 295.80939255528
53.75013028 304.757184488918
53.77613028 299.593747318489
53.80213028 303.889215948653
53.82813028 320.695637999331
53.85413028 291.701441117117
53.88013028 270.266217956702
53.90613028 297.544464646683
53.93213028 329.377469615792
53.95813028 333.291559423579
53.98413028 309.892983777319
54.01013028 311.498504750736
54.03613028 327.565709493797
54.06213028 310.574909100374
54.08813028 312.636571851581
54.11413028 305.502662987896
54.14013028 280.780564379512
54.16613028 294.710363090418
54.19213028 321.568099615535
54.21813028 323.282666053075
54.24413028 307.35714788862
54.27013028 280.735481568328
54.29613028 329.190220522804
54.32213028 293.191700545369
54.34813028 350.700354064231
54.37413028 315.233670548723
54.40013028 331.689112195539
54.42613028 339.943753444686
54.45213028 304.241257363962
54.47813028 331.83560157257
54.50413028 326.54085214191
54.53013028 307.312842407747
54.55613028 331.099609847723
54.58213028 362.782096485108
54.60813028 345.301171993592
54.63413028 342.07996221001
54.66013028 389.207758233337
54.68613028 369.069469068827
54.71213028 400.081687776564
54.73813028 398.265372961318
54.76413028 397.999999999892
54.79013028 397.086187825493
54.81613028 406.942788701179
54.84213028 387.438745445091
54.86813028 389.420226483811
54.89413028 432.832027204856
54.92013028 430.35799288401
54.94613028 480.256705141055
54.97213028 499.132273517231
54.99813028 473.463683482804
55.02413028 482.016696201636
55.05013028 531.431587175403
55.07613028 500.157318282302
55.10213028 548.81110510093
55.12813028 540.455328871607
55.15413028 551.047801724024
55.18013028 582.774222502415
55.20613028 607.611220850435
55.23213028 598.842469188218
55.25813028 627.819701769767
55.28413028 695.12193477473
55.31013028 736.745623363383
55.33613028 845.878496332017
55.36213028 975.635738951727
55.38813028 1059.93516282376
55.41413028 1065.45942549137
55.44013028 1111.2603887974
55.46613028 1242.93321078138
55.49213028 1405.86701589229
55.51813028 1695.22764956451
55.54413028 2271.50663964508
55.57013028 3366.32901244211
55.59613028 6218.76991555299
55.62213028 11635.7942298022
55.64813028 12984.2125279498
55.67413028 8528.95941404418
55.70013028 4503.57137721387
55.72613028 3380.93359258109
55.75213028 4384.59902754103
55.77813028 6495.49346693578
55.80413028 6438.91225908225
55.83013028 3938.67513412711
55.85613028 1912.57732220622
55.88213028 1092.62578385907
55.90813028 791.8262094303
55.93413028 607.41530486242
55.96013028 515.915347766606
55.98613028 470.355090044479
56.01213028 414.311565380417
56.03813028 399.188384742409
56.06413028 395.17806599365
56.09013028 372.746907363717
56.11613028 367.330022724383
56.14213028 356.032205596031
56.16813028 339.241386646248
56.19413028 339.85228475344
56.22013028 352.534020102046
56.24613028 338
56.27213028 323.72209860838
56.29813028 302.751426481173
56.32413028 318.597556770708
56.35013028 324.178304564659
56.37613028 316.925656981091
56.40213028 324.375340620074
56.42813028 328.91618322772
56.45413028 306.490930956431
56.48013028 300.537726313408
56.50613028 295.526478396936
56.53213028 283.225464288439
56.55813028 299.609037210409
56.58413028 293.375043918264
56.61013028 299.754013550368
56.63613028 312.489211437642
56.66213028 333.211264935976
56.68813028 310.231122541904
56.71413028 277.897812617348
56.74013028 282.339280461776
56.76613028 286.715204951211
56.79213028 305.643665017469
56.81813028 325.845572461691
56.84413028 285.920783031013
56.87013028 277.40129455911
56.89613028 314.907976967348
56.92213028 295.695763795213
56.94813028 279.60335640199
56.97413028 324.955585230502
57.00013028 314.619598016661
57.02613028 332.672774313022
57.05213028 281.404581759273
57.07813028 288.512194872072
57.10413028 278.659319276279
57.13013028 330.417436419402
57.15613028 302.597308665438
57.18213028 265.992309943992
57.20813028 258.071688284643
57.23413028 260.943350015514
57.26013028 309.559718962739
57.28613028 283.12310948644
57.31213028 305.783744852326
57.33813028 291.937159975819
57.36413028 279.821937492841
57.39013028 249.509346676858
57.41613028 281.643103703136
57.44213028 260.653065057997
57.46813028 282.079033042297
57.49413028 289.409468730111
57.52013028 307.439429068809
57.54613028 287.586721817666
57.57213028 284.852126868277
57.59813028 291.737636605567
57.62413028 293.832282283035
57.65013028 286.598760085208
57.67613028 285.812437697951
57.70213028 272.357238108722
57.72813028 273.755558676725
57.75413028 287.522733123298
57.78013028 303.363976441991
57.80613028 271.909993188023
57.83213028 267.02323153969
57.85813028 304.663119194232
57.88413028 280.347032135094
57.91013028 271.3388223883
57.93613028 249.463912519537
57.96213028 230.857197765804
57.98813028 281.776244770713
58.01413028 292.331042112198
58.04013028 273.876539167444
58.06613028 268
58.09213028 285.649387449429
58.11813028 293.712482551872
58.14413028 300.606037177788
58.17013028 296.265202055391
58.19613028 287.930040768404
58.22213028 309.558712595763
58.24813028 306.581434904162
58.27413028 336.064197737354
58.30013028 368.871513379965
58.32613028 441.547547926268
58.35213028 534.812066358065
58.37813028 532.783316306868
58.40413028 471.853962648686
58.43013028 398.925938100867
58.45613028 356.426155397484
58.48213028 356.524233139609
58.50813028 384.241141102343
58.53413028 393.509930546207
58.56013028 370.774122748054
58.58613028 315.693309494881
58.61213028 262.186646155096
58.63813028 276.687508938376
58.66413028 283.904531882092
58.69013028 263.661419669127
58.71613028 262.790747798113
58.74213028 291.489979233692
58.76813028 291.107464761899
58.79413028 272.527987947517
58.82013028 266.248286351278
58.84613028 252.558225919499
58.87213028 250.936685395088
58.89813028 274.540761921813
58.92413028 254.361676540349
58.95013028 260.021263915641
58.97613028 256.418384655641
59.00213028 253.91920232887
59.02813028 261.336612706754
59.05413028 279.444567631331
59.08013028 282.21127795674
59.10613028 242.531400943573
59.13213028 222.041940475425
59.15813028 244.125319167989
59.18413028 221.819176031222
59.21013028 243.82168590108
59.23613028 228.875097281942
59.26213028 229.331160935074
59.28813028 280.898799915869
59.31413028 241.509337142579
59.34013028 202.919027936446
59.36613028 241.867035886066
59.39213028 276.630265550189
59.41813028 275.127744865511
59.44413028 247.96405261682
59.47013028 255.022396078571
59.49613028 261.528491131041
59.52213028 255.193171958886
59.54813028 233.96065264153
59.57413028 252.52866203697
59.60013028 257.53087171852
59.62613028 252.273063017328
59.65213028 256.05834346175
59.67813028 256.322103631637
59.70413028 243.346489889284
59.73013028 252.45722534409
59.75613028 267.608259880031
59.78213028 247.218299971055
59.80813028 271.970242656519
59.83413028 251.23336431274
59.86013028 271.55826754305
59.88613028 261.340528886325
59.91213028 259.081758928131
59.93813028 294.120335004052
59.96413028 297.878551901543
59.99013028 292.423878050862
60.01613028 254.303314010065
60.04213028 261.914108876317
60.06813028 262.100413219555
60.09413028 262.889664487863
60.12013028 234.84824975098
60.14613028 249.266217956635
60.17213028 259.739078491066
60.19813028 238.900641744045
60.22413028 235.840053024955
60.25013028 239.320522929495
60.27613028 253.123335036674
60.30213028 247.897138527893
60.32813028 237.195997599081
60.35413028 242.904415620476
60.38013028 208.315594335105
60.40613028 237.300445821105
60.43213028 251.282024052908
60.45813028 270.01805740131
60.48413028 275.999999999925
60.51013028 246.763687737687
60.53613028 237.441971027952
60.56213028 251.510201206499
60.58813028 252.793154427122
60.61413028 239.940501820295
60.64013028 236.3625926873
60.66613028 247.070610766026
60.69213028 249.354192966053
60.71813028 250.606117863621
60.74413028 240.451070880172
60.77013028 221.9979872659
60.79613028 226.813489175052
60.82213028 237.671041773474
60.84813028 241.805754008927
60.87413028 232.936072922936
60.90013028 228.91036708917
60.92613028 249.880987133328
60.95213028 251.068736848569
60.97813028 243.209226160357
61.00413028 231.982778059813
61.03013028 234.311548873152
61.05613028 250.180317298757
61.08213028 246.310739453556
61.10813028 251.567376929537
61.13413028 238.375815200812
61.16013028 227.934066236605
61.18613028 234.122651412952
61.21213028 221.07398818623
61.23813028 225.890086985555
61.26413028 228.568386783082
61.29013028 238.163366018861
61.31613028 259.693266946114
61.34213028 250.424955569479
61.36813028 223.106251913133
61.39413028 221.954894633793
61.42013028 253.439806456451
61.44613028 267.747410547242
61.47213028 259.177859511943
61.49813028 244.123164130746
61.52413028 245.936369624744
61.55013028 242.668032206523
61.57613028 245.29637524285
61.60213028 238.574854456066
61.62813028 217.695750774451
61.65413028 228.478750385752
61.68013028 257.706427842319
61.70613028 261.176552956585
61.73213028 252.121438564192
61.75813028 231.47217342415
61.78413028 226.265853589819
61.81013028 228.226277194614
61.83613028 240.201032920823
61.86213028 231.420616892215
61.88813028 224.665341896541
61.91413028 238.121664114368
61.94013028 248.592637710583
61.96613028 240.103113063866
61.99213028 249.007977223556
62.01813028 240.891703263487
62.04413028 227.346328517617
62.07013028 248.0845620133
62.09613028 258.015551017946
62.12213028 274.023796340515
62.14813028 239.174101217538
62.17413028 267.534097301384
62.20013028 282
62.22613028 282.91243795408
62.25213028 295.983426107661
62.27813028 322.819969868792
62.30413028 303.879122750136
62.33013028 321.563832089839
62.35613028 310.290675365916
62.38213028 321.115519184785
62.40813028 327.703879835414
62.43413028 283.150383001579
62.46013028 300.761245532898
62.48613028 332.258034251434
62.51213028 331.066217444449
62.53813028 321.430310148058
62.56413028 279.329945525052
62.59013028 283.559870800217
62.61613028 297.908031611744
62.64213028 291.661761480978
62.66813028 310.961865490296
62.69413028 259.153886217733
62.72013028 285.837978673552
62.74613028 268.060233886467
62.77213028 263.26466329608
62.79813028 285.301397543832
62.82413028 265.260934529692
62.85013028 265.189507371075
62.87613028 225.429020099955
62.90213028 256.266730674489
62.92813028 269.040672982352
62.95413028 236.475083236674
62.98013028 205.927879683397
63.00613028 228.799605592781
63.03213028 233.926218295425
63.05813028 241.343754469186
63.08413028 223.039176452541
63.11013028 223.386785483993
63.13613028 228.91502502327
63.16213028 240.063675485305
63.18813028 229.112854916258
63.21413028 222.301010621927
63.24013028 265.411226385948
63.26613028 259.871642662337
63.29213028 245.992332499016
63.31813028 237.08839750704
63.34413028 245.338180388066
63.37013028 245.605443774168
63.39613028 229.40933339997
63.42213028 240.588331122602
63.44813028 252.609688744838
63.47413028 235.007006432292
63.50013028 241.875013109616
63.52613028 249.780703196156
63.55213028 260.249989362809
63.57813028 253.07752697822
63.60413028 244.501549893492
63.63013028 249.540232696767
63.65613028 250.530310404186
63.68213028 240.592237767913
63.70813028 238.146521466254
63.73413028 241.996738841355
63.76013028 239.981242467719
63.78613028 258.785860827277
63.81213028 274.704563459126
63.83813028 250.261553974842
63.86413028 243.586350477794
63.89013028 264.117980458097
63.91613028 253.94716295423
63.94213028 252.950294830496
63.96813028 260.186385029069
63.99413028 252.210564804934
64.02013028 262.479576312612
64.04613028 271
64.07213028 285.490595192332
64.09813028 299.151057091042
64.12413028 282.813673101739
64.15013028 291.076081606221
64.17613028 297.663729105108
64.20213028 303.18524937964
64.22813028 301.703341076093
64.25413028 285.344051170998
64.28013028 302.045227675594
64.30613028 294.29861096593
64.33213028 260.638346014676
64.35813028 263.297804107595
64.38413028 274.687844702465
64.41013028 270.553835159182
64.43613028 305.763768423505
64.46213028 271.33184199753
64.48813028 263.680073960622
64.51413028 244.405749497988
64.54013028 240.597331220458
64.56613028 221.47757311278
64.59213028 239.769725939844
64.61813028 255.937340416008
64.64413028 267.01515456178
64.67013028 246.57675092854
64.69613028 256.400256102766
64.72213028 257.024057466547
64.74813028 244.817185852145
64.77413028 256.926963536453
64.80013028 237.594057041065
64.82613028 225.173301332203
64.85213028 240.142663417551
64.87813028 265.081120414468
64.90413028 236.675757838381
64.93013028 232.411778166022
64.95613028 262.555454923616
64.98213028 249.635897762128
65.00813028 235
65.03413028 235.057575665705
65.06013028 247.928585862142
65.08613028 255.876674497588
65.11213028 240.405407686123
65.13813028 240.964739727036
65.16413028 228.5873733521
65.19013028 253.512168830549
65.21613028 206.381411836868
65.24213028 217.800808907349
65.26813028 235.472308754296
65.29413028 239.715617914638
65.32013028 248.057553110682
65.34613028 251.656084159013
65.37213028 260.754390938007
65.39813028 253.344831987804
65.42413028 253.711189017276
65.45013028 239.623572327045
65.47613028 237.835749923474
65.50213028 247.909931570719
65.52813028 232.865987895457
65.55413028 238.671796548758
65.58013028 258.513336569259
65.60613028 239.415846182991
65.63213028 229.118919160074
65.65813028 225.701118373789
65.68413028 225.756371582822
65.71013028 233.464492902407
65.73613028 250.730539953179
65.76213028 231.295440027373
65.78813028 229.166824124955
65.81413028 258.150124436832
65.84013028 247.398027352687
65.86613028 255.172888368774
65.89213028 243.367195977076
65.91813028 239.336567596705
65.94413028 246.600040599045
65.97013028 241.880509991329
65.99613028 238
66.02213028 240.509527117047
66.04813028 233.973026673035
66.07413028 233.860297552782
66.10013028 241.780919212133
66.12613028 257.929237396569
66.15213028 260.066756203761
66.17813028 241.371647429484
66.20413028 241.600588892616
66.23013028 253.288020631652
66.25613028 252.771513123838
66.28213028 247.887364586219
66.30813028 225.270537565438
66.33413028 221.757742316752
66.36013028 231.517688267293
66.38613028 239.677151127345
66.41213028 245.864694360858
66.43813028 237
66.46413028 242.504433664492
66.49013028 251.243902563966
66.51613028 253.122283559577
66.54213028 252
66.56813028 246.552822744376
66.59413028 237.363634630133
66.62013028 232.205816650804
66.64613028 246.683844350565
66.67213028 264.240941593627
66.69813028 246.847010860703
66.72413028 246.045721324853
66.75013028 238.300884825917
66.77613028 240.73598823835
66.80213028 243.384017974608
66.82813028 224.726069432272
66.85413028 220.183552415864
66.88013028 247.10123914641
66.90613028 236.510452798261
66.93213028 244.678070760792
66.95813028 224.515698088224
66.98413028 217.670535103456
67.01013028 249.001338644644
67.03613028 248.874639208468
67.06213028 241.074410683979
67.08813028 247.558864433167
67.11413028 247.263872945009
67.14013028 248.386982431444
67.16613028 242.395239849541
67.19213028 273.116277446564
67.21813028 251.683825282034
67.24413028 254.194829860366
67.27013028 253.47556991295
67.29613028 270.740968915777
67.32213028 259.231541553098
67.34813028 269.995619699184
67.37413028 240.888577434981
67.40013028 238.781996730749
67.42613028 229.098935758271
67.45213028 237.958607818029
67.47813028 216.43466789385
67.50413028 236.916144165434
67.53013028 266.778332142936
67.55613028 280.034770110211
67.58213028 257.32707128831
67.60813028 237.619414089965
67.63413028 264.743807576742
67.66013028 243.933956947989
67.68613028 215.221703432843
67.71213028 265.104070834367
67.73813028 277.670125626518
67.76413028 288.588469939248
67.79013028 271.852014093155
67.81613028 271.942743591132
67.84213028 275.731285194201
67.86813028 249.235928826899
67.89413028 272.563347974844
67.92013028 283.12748978725
67.94613028 292.038189154015
67.97213028 255.021977067364
67.99813028 270.085613490403
68.02413028 283.360383005751
68.05013028 277.319013378922
68.07613028 260.816628024305
68.10213028 283.841549554775
68.12813028 279.115887038164
68.15413028 294.902583326568
68.18013028 270.062066180356
68.20613028 302.69546012025
68.23213028 320.055882188435
68.25813028 279.426446051527
68.28413028 283.811131142592
68.31013028 315.397701122854
68.33613028 330.698679655499
68.36213028 360.171891535991
68.38813028 375.071172080359
68.41413028 400.579518437923
68.44013028 476.233205502313
68.46613028 639.463823935512
68.49213028 777.063094177215
68.51813028 694.902703999934
68.54413028 497.037087444385
68.57013028 392.59514758043
68.59613028 359.518204471575
68.62213028 346.553932352281
68.64813028 412.150094908841
68.67413028 507.76240629864
68.70013028 527.470744559407
68.72613028 445.353471205285
68.75213028 333.347106773116
68.77813028 307.419800499631
68.80413028 312.514552904524
68.83013028 319.338580330801
68.85613028 302.161553718687
68.88213028 283.287436762297
68.90813028 292.260073026894
68.93413028 303.709105131602
68.96013028 294.308955756197
68.98613028 287.932327649286
69.01213028 297
69.03813028 284.137312325483
69.06413028 260.670529055685
69.09013028 271.001357713165
69.11613028 278.134841517907
69.14213028 276.961920134615
69.16813028 291.623253070206
69.19413028 283.754103770462
69.22013028 296.813879583452
69.24613028 304.749297485462
69.27213028 308.80647669499
69.29813028 298.622827086019
69.32413028 288.818734465007
69.35013028 278.00259660346
69.37613028 275.883006840421
69.40213028 262.087158616758
69.42813028 274.034631293559
69.45413028 273.811669901907
69.48013028 286.000319256837
69.50613028 289.93749225341
69.53213028 276.848510877012
69.55813028 271.220500118341
69.58413028 265.072110782337
69.61013028 268.516210805859
69.63613028 267.766352006213
69.66213028 265.765216356782
69.68813028 281.685015575772
69.71413028 278.539594183108
69.74013028 258.374518179716
69.76613028 257.39000153259
69.79213028 264.131896129587
69.81813028 268.463818812952
69.84413028 269.376095395364
69.87013028 282.981232933456
69.89613028 273.852168491821
69.92213028 311.331545295723
69.94813028 297.901225613394
69.97413028 274.258553942215
70.00013028 256.403962314127
70.02613028 277.887625712239
70.05213028 295.894264291156
70.07813028 302.376363494381
70.10413028 270.886690496765
70.13013028 257.312510130163
70.15613028 277.801050964843
70.18213028 273.761110202754
70.20813028 268.269034062633
70.23413028 276.920118475821
70.26013028 272.919615292296
70.28613028 265.002641713508
70.31213028 285.794273569292
70.33813028 273.25634426066
70.36413028 277.851794590533
70.39013028 272.237380246673
70.41613028 305.268001654047
70.44213028 297.594079596084
70.46813028 284.901293278472
70.49413028 279.396262723859
70.52013028 265.337622560295
70.54613028 267.603611480261
70.57213028 286.710592127155
70.59813028 239.660736045495
70.62413028 301.819743393335
70.65013028 300.804221903393
70.67613028 316.877119550303
70.70213028 266.993745781739
70.72813028 294.415106989748
70.75413028 278.175788647032
70.78013028 279.492817894648
70.80613028 289.818479386742
70.83213028 289.624727044996
70.85813028 310.109554695333
70.88413028 304.42130400243
70.91013028 297.952036904308
70.93613028 268.421397709012
70.96213028 264.937169510081
70.98813028 265.535552207643
71.01413028 249.109364720861
71.04013028 256.535206909295
71.06613028 274.644226331657
71.09213028 268.226909660524
71.11813028 268.460899466163
71.14413028 275.708830984821
71.17013028 283.302142784856
71.19613028 274.901625556071
71.22213028 269
71.24813028 275.330009703624
71.27413028 282.115393388903
71.30013028 288.905251081591
71.32613028 268.473870387907
71.35213028 242.913699399387
71.37813028 270.419980939807
71.40413028 273.781713049712
71.43013028 262.508359378332
71.45613028 268.214490518839
71.48213028 263.475595954463
71.50813028 271.878229158219
71.53413028 288.190846015721
71.56013028 290.45819962185
71.58613028 287.991977666397
71.61213028 290.458622119544
71.63813028 284.316668367223
71.66413028 273.051511421886
71.69013028 282.679405918935
71.71613028 296.363199111683
71.74213028 276.665084256997
71.76813028 249.565444881134
71.79413028 257.917289349121
71.82013028 279.953052805619
71.84613028 291.976058795071
71.87213028 291.369195690424
71.89813028 291.535507097599
71.92413028 301.000854529645
71.95013028 307.01484832571
71.97613028 277.551767780777
72.00213028 284.345254485497
72.02813028 269.574719125917
72.05413028 248.436887109661
72.08013028 270.839388469763
72.10613028 276.083304054489
72.13213028 271.043569774115
72.15813028 267.714369490089
72.18413028 287.480340622154
72.21013028 305.162582640774
72.23613028 285.422661715605
72.26213028 293.468264217571
72.28813028 252.236109267099
72.31413028 258.428487388424
72.34013028 272.242176997409
72.36613028 259.745874955147
72.39213028 280.160621064504
72.41813028 288.627004391617
72.44413028 282.585612209759
72.47013028 267.999515885005
72.49613028 294.395188691576
72.52213028 274.412765464542
72.54813028 272.642636095394
72.57413028 283.380892146103
72.60013028 286.11704175612
72.62613028 288.713911416611
72.65213028 300.764465068001
72.67813028 281.745497567496
72.70413028 298.06618535516
72.73013028 275.404581759271
72.75613028 280.712459996849
72.78213028 276.285514248291
72.80813028 283.280556125889
72.83413028 315.334213050745
72.86013028 292.053456490912
72.88613028 295.08686191495
72.91213028 305.977716696551
72.93813028 288.215064853932
72.96413028 256.699850880717
72.99013028 289.887257858875
73.01613028 262.251447755558
73.04213028 255.309823306602
73.06813028 295.352941055006
73.09413028 301.714072788281
73.12013028 272.604931056371
73.14613028 284.538777790507
73.17213028 298.58251847055
73.19813028 262.669180876759
73.22413028 257.99999999986
73.25013028 328.387739767969
73.27613028 278.865649570129
73.30213028 312.306132677266
73.32813028 301.537213595624
73.35413028 270.633256048632
73.38013028 296.955546168224
73.40613028 274.050324614645
73.43213028 252.608488916838
73.45813028 256.106454908345
73.48413028 262.678102850077
73.51013028 272.467376673408
73.53613028 277.279517669548
73.56213028 258.502159804375
73.58813028 298.619662195247
73.61413028 279.956527418972
73.64013028 285.003751321409
73.66613028 296.261366561648
73.69213028 289.596334387678
73.71813028 295.665364451565
73.74413028 295.236773822289
73.77013028 290.317845640207
73.79613028 285.696918513164
73.82213028 290.506940047855
73.84813028 302.970803970853
73.87413028 319.98613897283
73.90013028 308.372186188773
73.92613028 311.664116026847
73.95213028 302.366441201815
73.97813028 294.13812174507
74.00413028 295.837524086572
74.03013028 299.570525313059
74.05613028 305.806966857753
74.08213028 307.448528921031
74.10813028 290.753536408367
74.13413028 294.5436742956
74.16013028 308.956591597551
74.18613028 327.44771252844
74.21213028 327.933053821788
74.23813028 314.919373234797
74.26413028 320.482015030899
74.29013028 316.279072616831
74.31613028 307.302636434119
74.34213028 315.662948288296
74.36813028 329.230696557711
74.39413028 335.648071359811
74.42013028 319.116235823015
74.44613028 301.627949141357
74.47213028 324.96044964631
74.49813028 329.745003918249
74.52413028 338.367860532276
74.55013028 337.762100062545
74.57613028 352.126728964177
74.60213028 322.177227046042
74.62813028 331.431029347563
74.65413028 332.002748440685
74.68013028 328.404717089414
74.70613028 329.39318897841
74.73213028 309.080929514759
74.75813028 338.369221731946
74.78413028 322.835691792665
74.81013028 322.885180946195
74.83613028 300.307855682556
74.86213028 293.807034522829
74.88813028 301.341799865896
74.91413028 296.550816058039
74.94013028 313.519291524464
74.96613028 303.138715148696
74.99213028 322.816763354456
75.01813028 325.028657269839
75.04413028 315.653958649935
75.07013028 293.744239608693
75.09613028 305.290033365753
75.12213028 319.526729988705
75.14813028 307.301913748118
75.17413028 315.269469581086
75.20013028 320.869187436801
75.22613028 341.91081911488
75.25213028 299.09374859914
75.27813028 333.904954379783
75.30413028 333.51073996581
75.33013028 340.729623806227
75.35613028 360.955540120258
75.38213028 346.16606934967
75.40813028 350.544761348479
75.43413028 382.041179652385
75.46013028 356.870045452941
75.48613028 389.60831801091
75.51213028 364.982765039054
75.53813028 362.012531916799
75.56413028 415.238621698227
75.59013028 386.720656722881
75.61613028 365.712827850232
75.64213028 458.701085359241
75.66813028 477.193168472391
75.69413028 574.437760707834
75.72013028 595.821866341269
75.74613028 506.272008978935
75.77213028 449.95433075818
75.79813028 402.859810876519
75.82413028 374.946385623922
75.85013028 339.560058213392
75.87613028 353.203490707642
75.90213028 419.411384271122
75.92813028 446.939766113534
75.95413028 385.545916991644
75.98013028 396.160024174387
76.00613028 325.815628630246
76.03213028 315.458393082803
76.05813028 308.228854729539
76.08413028 317.024363702452
76.11013028 316.112338711974
76.13613028 299.647800699518
76.16213028 304.092252069309
76.18813028 320.459776837492
76.21413028 309.505295167142
76.24013028 287.257821721951
76.26613028 283.153995506348
76.29213028 294.621143143016
76.31813028 309.47230875429
76.34413028 298.858904263827
76.37013028 296.748165322529
76.39613028 330.41419084278
76.42213028 323.612198614704
76.44813028 289.301014108418
76.47413028 282.108961291708
76.50013028 282.485208524473
76.52613028 292.137960373401
76.55213028 289.867200744217
76.57813028 292.385033875921
76.60413028 282.685773837558
76.63013028 281.844468901563
76.65613028 312.904892762489
76.68213028 307.511843525943
76.70813028 301.085029621042
76.73413028 302.369644229632
76.76013028 302.412649202928
76.78613028 303.804473494992
76.81213028 320.404475031898
76.83813028 326.508466105686
76.86413028 308.571499590824
76.89013028 317.956313964259
76.91613028 307.563058246046
76.94213028 299.320793589784
76.96813028 331.902125253089
76.99413028 338.277733972191
77.02013028 340.035292362244
77.04613028 346.11538385464
77.07213028 327.329406765742
77.09813028 320.009702790103
77.12413028 337.077317010012
77.15013028 353.754732749872
77.17613028 352.059114744296
77.20213028 329.329551630146
77.22813028 350.333199710712
77.25413028 382.500930448351
77.28013028 393.358679994223
77.30613028 384.073359206885
77.33213028 371.909202836944
77.35813028 360.326506487483
77.38413028 375.582679842216
77.41013028 367.150383001581
77.43613028 350.959346086188
77.46213028 374.476853913273
77.48813028 380.046221021886
77.51413028 399.791357708783
77.54013028 392.05929518449
77.56613028 396.306942096849
77.59213028 459.967462126367
77.61813028 470.797960712126
77.64413028 478.837381783429
77.67013028 506.708070161778
77.69613028 473.441348096297
77.72213028 515.623501175474
77.74813028 535.584514697388
77.77413028 607.837804281116
77.80013028 660.701079311495
77.82613028 709.162146197115
77.85213028 801.739467974245
77.87813028 915.674576153664
77.90413028 1057.7590470216
77.93013028 1324.140985308
77.95613028 1865.03392561126
77.98213028 2625.87305089
78.00813028 3991.93050261078
78.03413028 5064.87080577944
78.06013028 4366.45588663169
78.08613028 2760.45255666852
78.11213028 1690.6748028434
78.13813028 1301.66940386572
78.16413028 1210.58225478324
78.19013028 1328.04986212945
78.21613028 1670.83929547414
78.24213028 2270.87331500517
78.26813028 2739.46356352012
78.29413028 2104.87852187744
78.32013028 1385.01384402355
78.34613028 915.557916411414
78.37213028 663.398312884264
78.39813028 516.388128540418
78.42413028 447.544210493646
78.45013028 407.388014840017
78.47613028 383.758720081018
78.50213028 377.541274639601
78.52813028 360.759578097156
78.55413028 329.275550332162
78.58013028 344.037947096513
78.60613028 329.850172264982
78.63213028 328.445209631575
78.65813028 308.066162800137
78.68413028 314.133154088398
78.71013028 303.649849009397
78.73613028 294.572335051941
78.76213028 313.667377185663
78.78813028 336.621794677446
78.81413028 327.833337246702
78.84013028 295.04372161151
78.86613028 290.080384707703
78.89213028 263.366121944968
78.91813028 295.767328845267
78.94413028 309.127983436343
78.97013028 293.964478601017
78.99613028 266.362951006416
79.02213028 271.323416234759
79.04813028 280.312626391772
79.07413028 296.513381679305
79.10013028 303.09059416783
79.12613028 256.262118775672
79.15213028 260.447825303548
79.17813028 297.594350256364
79.20413028 280.951366301346
79.23013028 273.150285808488
79.25613028 268.307433184864
79.28213028 268.072201002428
79.30813028 265.5294654088
79.33413028 275.509375279644
79.36013028 286.23928020565
79.38613028 286.691263746282
79.41213028 281.204181304347
79.43813028 266.910254314049
79.46413028 256.521991368772
79.49013028 262.727952883994
79.51613028 270.178304564656
79.54213028 256.176417626438
79.56813028 248.205071409782
79.59413028 272.605472376977
79.62013028 289.239544818166
79.64613028 277.57189953349
79.67213028 282.854494434838
79.69813028 294.674302932119
79.72413028 285.659990804465
79.75013028 250.794015929773
79.77613028 251.573873205282
79.80213028 299.162701463669
79.82813028 301.709134659634
79.85413028 266.907667244859
79.88013028 269.437196832238
79.90613028 279.697857215142
79.93213028 280.103283969796
79.95813028 290.072901133408
79.98413028 285.308004033456
80.01013028 284.205390666618
80.03613028 290.297614133137
80.06213028 268.421155651528
80.08813028 259.891322389346
80.11413028 268.505007999586
80.14013028 263.395769074597
80.16613028 272.377927689268
80.19213028 276.780267677703
80.21813028 276.209810029715
80.24413028 274.401459417266
80.27013028 259.820760219864
80.29613028 249.921898686701
80.32213028 281.576857655892
80.34813028 261.121389967649
80.37413028 267.300552548306
80.40013028 267.877168146851
80.42613028 261
80.45213028 259.433377845757
80.47813028 253.308180987154
80.50413028 293.483379717067
80.53013028 270.455544887586
80.55613028 267.990348367695
80.58213028 299.447674391381
80.60813028 264.170730770269
80.63413028 237.582653800689
80.66013028 266.876606832517
80.68613028 263.313407208578
80.71213028 242.745026473266
80.73813028 276.920450753419
80.76413028 269.979813602982
80.79013028 256.118725699118
80.81613028 268.7607649044
80.84213028 249.566499844866
80.86813028 295.164130328427
80.89413028 246.552987602526
80.92013028 263.780070730255
80.94613028 262.204042487709
80.97213028 270.298571903643
80.99813028 268.263576243197
81.02413028 251.760058725655
81.05013028 253.569186668417
81.07613028 248.705753752862
81.10213028 286.387891605257
81.12813028 258.361338214999
81.15413028 241.916102541895
81.18013028 254.325648471334
81.20613028 262.829340381301
81.23213028 269.759884333229
81.25813028 279.129183264515
81.28413028 276.985019830651
81.31013028 265.690041363255
81.33613028 309.205935473677
81.36213028 253.95583426098
81.38813028 266.822195132371
81.41413028 279.260153712885
81.44013028 287.434622783801
81.46613028 276.06274026982
81.49213028 287.643206943996
81.51813028 273.30283338157
81.54413028 271.333957972484
81.57013028 284.407762232089
81.59613028 286.264285908436
81.62213028 293.76208099402
81.64813028 278.741565805903
81.67413028 287.970687709243
81.70013028 263.211074961511
81.72613028 273.178584759214
81.75213028 287.502420930393
81.77813028 293.98814217266
81.80413028 284.49079562628
81.83013028 276.189255779163
81.85613028 271.737649626326
81.88213028 262.826950259561
81.90813028 266.343193154849
81.93413028 260.346286894075
81.96013028 284.791018458413
81.98613028 302.833211450829
82.01213028 309.755155247555
82.03813028 306.996764882886
82.06413028 282.914763897243
82.09013028 273.018380144638
82.11613028 272.941930685036
82.14213028 279.280043408094
82.16813028 275.152876364176
82.19413028 261.354273651886
82.22013028 265.024283016786
82.24613028 279.358712083514
82.27213028 280.314561926533
82.29813028 271.503840260872
82.32413028 268
82.35013028 257.303084973322
82.37613028 242.15877923633
82.40213028 250.397736698649
82.42813028 250.740375512161
82.45413028 239.06037875088
82.48013028 243.761729647892
82.50613028 238.732965650708
82.53213028 266.375943557801
82.55813028 279.84301143403
82.58413028 244.386237190419
82.61013028 247.751345795337
82.63613028 255.842594984105
82.66213028 252.156717905685
82.68813028 259.259308717505
82.71413028 242.825521394826
82.74013028 231.92573418043
82.76613028 259.885335344862
82.79213028 280.634981615174
82.81813028 281.221938517343
82.84413028 298.546390647177
82.87013028 285.486024917064
82.89613028 257.253766725736
82.92213028 267.711566404919
82.94813028 273.519539629727
82.97413028 282.681012662598
83.00013028 268.258743916671
83.02613028 284.09774895103
83.05213028 267.411081521544
83.07813028 273.449264627786
83.10413028 247.325306659476
83.13013028 250.591079563466
83.15613028 257.860410327913
83.18213028 276.134644570444
83.20813028 264.006354897859
83.23413028 239.000019068397
83.26013028 270.217571237295
83.28613028 255.818569606834
83.31213028 275.593199024921
83.33813028 261.789515880831
83.36413028 251.036850509371
83.39013028 254.997161339044
83.41613028 240.15947936731
83.44213028 250.77390324558
83.46813028 274.268562968394
83.49413028 258.68678020461
83.52013028 274.144540821501
83.54613028 263.722921048738
83.57213028 264.85966857338
83.59813028 238.322552170856
83.62413028 283.319464479417
83.65013028 266.398382185307
83.67613028 259.549274418181
83.70213028 266.922005414039
83.72813028 259.29699468799
83.75413028 258
83.78013028 278.410942704901
83.80613028 244.175985594488
83.83213028 242.814279526123
83.85813028 233.331042112192
83.88413028 269.106038458428
83.91013028 281.203377932518
83.93613028 259.854178664646
83.96213028 244.6280012244
83.98813028 248.168620842944
84.01413028 266.745416881659
84.04013028 253.219174494462
84.06613028 260.343593097516
84.09213028 250.372231298838
84.11813028 248.607330712385
84.14413028 248.57691230021
84.17013028 240.282162869551
84.19613028 259.134376471417
84.22213028 257.409791473439
84.24813028 223.110248778537
84.27413028 228.196039222629
84.30013028 250.388191793704
84.32613028 275.620546252905
84.35213028 296.746813657124
84.37813028 283.710460283512
84.40413028 264.039827986971
84.43013028 266.228783577976
84.45613028 279.887145083745
84.48213028 268.523378609962
84.50813028 263.444212798788
84.53413028 266.749162155313
84.56013028 273.29180752885
84.58613028 279.457135123992
84.61213028 283.796483250844
84.63813028 264.464086911956
84.66413028 260.95842993923
84.69013028 261.395201712361
84.71613028 264.730136524012
84.74213028 288.38331784363
84.76813028 265.962514463472
84.79413028 265.272678656665
84.82013028 286.207329687876
84.84613028 260.021667344808
84.87213028 247.168598288053
84.89813028 242.795444794509
84.92413028 240.035876231611
84.95013028 245.96047220134
84.97613028 246.698518283833
85.00213028 265.450380283468
85.02813028 274.883955076665
85.05413028 284.027598819746
85.08013028 288.613473080774
85.10613028 263.22095121884
85.13213028 283.623620923582
85.15813028 263.544042148987
85.18413028 262.931131307787
85.21013028 250.446625475566
85.23613028 275.242883176157
85.26213028 290.691902259951
85.28813028 300.101332853007
85.31413028 278.240650939587
85.34013028 287.95905287086
85.36613028 284.451960985608
85.39213028 284.706512014508
85.41813028 256.042266705258
85.44413028 249.125173378336
85.47013028 287.849562354106
85.49613028 296.760261720875
85.52213028 294.902545189518
85.54813028 260.799421666149
85.57413028 292.311261705599
85.60013028 315.247163722612
85.62613028 315.431207226486
85.65213028 281.489679045381
85.67813028 309.621614237256
85.70413028 304.094842624996
85.73013028 282
85.75613028 282.674531968857
85.78213028 288.13560582745
85.80813028 281.218996615542
85.83413028 308.133189664184
85.86013028 309.886654920979
85.88613028 306.036489628993
85.91213028 266.220967726085
85.93813028 272.672641544147
85.96413028 296.881116415711
85.99013028 289.816412008323
86.01613028 264.074391615447
86.04213028 285.71876281167
86.06813028 267.431410221701
86.09413028 236.044098999146
86.12013028 290.53207759415
86.14613028 286.367308752211
86.17213028 297.251260342372
86.19813028 293.361586320251
86.22413028 276.480312019374
86.25013028 249.58053177798
86.27613028 273.039559887937
86.30213028 256.464141556282
86.32813028 274.195639279962
86.35413028 268.318510195399
86.38013028 273.007586815149
86.40613028 284.179652743567
86.43213028 283.484853691853
86.45813028 283.828459810134
86.48413028 265.992174613842
86.51013028 283.832611074215
86.53613028 280.214377743718
86.56213028 288.254018317498
86.58813028 282.43266818051
86.61413028 302.298855584695
86.64013028 287.747894662238
86.66613028 306.468769962361
86.69213028 304.651771523399
86.71813028 311.209316380457
86.74413028 289.104674697481
86.77013028 310.213261162816
86.79613028 319.502649967131
86.82213028 337.307335991777
86.84813028 312.018728929323
86.87413028 291.981781227028
86.90013028 308.473863414913
86.92613028 320.599434174661
86.95213028 327.759426259751
86.97813028 332.890041875507
87.00413028 334.620091665921
87.03013028 356.355928066862
87.05613028 353.793328819556
87.08213028 402.622803605778
87.10813028 494.495017116705
87.13413028 595.464262940424
87.16013028 724.159781191617
87.18613028 845.36737549207
87.21213028 840.550807449003
87.23813028 719.566091293173
87.26413028 607.72615709111
87.29013028 510.2849443249
87.31613028 437.462106267157
87.34213028 404.75804599156
87.36813028 405.878925802701
87.39413028 441.379033810688
87.42013028 509.056168430772
87.44613028 553.617508083225
87.47213028 554.244711983576
87.49813028 527.411621206047
87.52413028 445.122896956942
87.55013028 381.355906436884
87.57613028 343.419813520383
87.60213028 340.594905522944
87.62813028 319.124780408679
87.65413028 301.30338167515
87.68013028 286.378879412006
87.70613028 281.056569298653
87.73213028 272.731975790921
87.75813028 257.65283253476
87.78413028 262.486079561377
87.81013028 254.875003575348
87.83613028 252.948433933807
87.86213028 250.120928407683
87.88813028 271.345325637064
87.91413028 260.273737106781
87.94013028 271.628891329834
87.96613028 283.047469446435
87.99213028 283.090817156796
88.01813028 247.86497804191
88.04413028 248.420000933573
88.07013028 231.772609710987
88.09613028 247.083884437355
88.12213028 263.518204471575
88.14813028 250.284575546315
88.17413028 254.958469001502
88.20013028 256.055649665212
88.22613028 281.003987331139
88.25213028 249.150572975897
88.27813028 256.535597317691
88.30413028 260.619885184205
88.33013028 261.122138695182
88.35613028 234.644635808736
88.38213028 265.717369522711
88.40813028 266.455802527105
88.43413028 301.694667208076
88.46013028 273.128886562704
88.48613028 274.727395056149
88.51213028 269.643210430492
88.53813028 261.618559560326
88.56413028 251.470328109486
88.59013028 269.911009089337
88.61613028 263.960723793103
88.64213028 256.040102133756
88.66813028 259.940259762797
88.69413028 263.90057059247
88.72013028 247.591253955891
88.74613028 284.256624455233
88.77213028 268.037860362914
88.79813028 291.321790422573
88.82413028 265.234064443714
88.85013028 268.49365335577
88.87613028 263.56588039972
88.90213028 270.16611445972
88.92813028 254.169001717218
88.95413028 267.766555001437
88.98013028 258.742033413635
89.00613028 233.029896159994
89.03213028 224.769235777218
89.05813028 259.12168318296
89.08413028 246.168601774555
89.11013028 236.285298232317
89.13613028 254.355128181523
89.16213028 251.83112756516
89.18813028 255.506333623471
89.21413028 259.330090389457
89.24013028 247.73160793753
89.26613028 255.35278316984
89.29213028 257.506140162518
89.31813028 251.840946616885
89.34413028 268.177133339451
89.37013028 240.576174032176
89.39613028 242.559296465122
89.42213028 285.260559703312
89.44813028 265.255399510909
89.47413028 261.872003542731
89.50013028 283.353686296032
89.52613028 261.406682152202
89.55213028 233.693567134416
89.57813028 264.629297320281
89.60413028 264.024815728329
89.63013028 254.089700575902
89.65613028 249.311803951409
89.68213028 245.598095530017
89.70813028 243.059133812691
89.73413028 253.721520786788
89.76013028 260.158356738638
89.78613028 269.168127193812
89.81213028 256.609121382753
89.83813028 262.158156304692
89.86413028 262.440339167998
89.89013028 262.636384438386
89.91613028 271.368076548261
89.94213028 250.03156708236
89.96813028 252.62431059507
89.99413028 265.688747828658
90.02013028 246.457722479855
90.04613028 234.591834338751
90.07213028 246.738917119401
90.09813028 259.393388487117
90.12413028 268.435332449044
90.15013028 265.449103256121
90.17613028 247.627704522592
90.20213028 248.989490351562
90.22813028 268.558909543217
90.25413028 263.024093042327
90.28013028 251.849414003204
90.30613028 255
90.33213028 263.40091717147
90.35813028 267.436058621529
90.38413028 247.971742672831
90.41013028 248.235115920682
90.43613028 248.413961806044
90.46213028 267.287624175488
90.48813028 250.486053519852
90.51413028 257.59708916297
90.54013028 254.811979624474
90.56613028 260.650326151403
90.59213028 268.993477682709
90.61813028 263.48178599416
90.64413028 264.076117182006
90.67013028 258.568467468915
90.69613028 246.199729851969
90.72213028 240.651764550418
90.74813028 270.983087782384
90.77413028 257.264466348629
90.80013028 268.914134917842
90.82613028 254.969087938566
90.85213028 259.393630544616
90.87813028 257.133360570113
90.90413028 262.287278877128
90.93013028 253.680160694229
90.95613028 272.664290419441
90.98213028 269.592076396249
91.00813028 264.711179483014
91.03413028 251.0143642107
91.06013028 240.21664206958
91.08613028 244.058959420397
91.11213028 260.261847190152
91.13813028 264.745317127168
91.16413028 259.910695880261
91.19013028 287
91.21613028 286.46742875645
91.24213028 245.035853676584
91.26813028 257.906863873022
91.29413028 240.307558980748
91.32013028 244.864955486886
91.34613028 274.855132948662
91.37213028 235.014699974805
91.39813028 233.943224219632
91.42413028 265.732265519733
91.45013028 272.616898172346
91.47613028 241.028993033936
91.50213028 235.289394852082
91.52813028 237.680838270174
91.55413028 238
91.58013028 247.611449887174
91.60613028 236.042311815299
91.63213028 257.909860419154
91.65813028 267.908009056717
91.68413028 273.170395006175
91.71013028 262.461806078847
91.73613028 232.31602985355
91.76213028 248.52073945773
91.78813028 274.654135603625
91.81413028 265.879584310105
91.84013028 243.410914102102
91.86613028 244.881606578343
91.89213028 270.395720478036
91.91813028 249.698422015976
91.94413028 284.826220600555
91.97013028 272.002648686511
91.99613028 274.585218314865
92.02213028 274.359286418605
92.04813028 265.048330949074
92.07413028 246.92461852476
92.10013028 243.376611599649
92.12613028 262.965800738397
92.15213028 261.512356243739
92.17813028 268.265553401508
92.20413028 265.465502755948
92.23013028 243.731517717435
92.25613028 237.69473138664
92.28213028 249.693860349733
92.30813028 251.232448165783
92.33413028 219.870959038619
92.36013028 227.652770917459
92.38613028 275.742677975069
92.41213028 281.981120158327
92.43813028 272.731662581846
92.46413028 262.126154629102
92.49013028 256.791367243269
92.51613028 256.31777797513
92.54213028 249.986713307914
92.56813028 255.954094748313
92.59413028 260.079207434724
92.62013028 255.569370595107
92.64613028 260.537358460024
92.67213028 254.746075389106
92.69813028 247.495082220509
92.72413028 258.874374595943
92.75013028 267.263505091625
92.77613028 273.243915584728
92.80213028 259.444171175237
92.82813028 248.987490638226
92.85413028 246.186362474049
92.88013028 245.308377934597
92.90613028 266.722356247911
92.93213028 268.550113365798
92.95813028 255.305619959479
92.98413028 276.43521618743
93.01013028 288.047621283832
93.03613028 289.63487488782
93.06213028 285.658965368887
93.08813028 251.632732871355
93.11413028 277.55823545376
93.14013028 273.443138766668
93.16613028 270.925966703662
93.19213028 268.258586031503
93.21813028 271.735301128138
93.24413028 277.851326982941
93.27013028 271.915276614884
93.29613028 275.875587444706
93.32213028 291.956423252876
93.34813028 335.426536271634
93.37413028 311.297830149118
93.40013028 299.340600037895
93.42613028 279.354283186148
93.45213028 286.956178634121
93.47813028 291.252795934472
93.50413028 285.744333315285
93.53013028 283.572637801514
93.55613028 321
93.58213028 323.634039426703
93.60813028 344.301194548617
93.63413028 337.640371769537
93.66013028 334.879832415376
93.68613028 349.273810819633
93.71213028 405.819579460386
93.73813028 401.79477070505
93.76413028 379.443251541787
93.79013028 393.006956910543
93.81613028 489.143157066815
93.84213028 496.126344603559
93.86813028 508.060036013829
93.89413028 606.077729048239
93.92013028 699.191612886557
93.94613028 995.164382631004
93.97213028 1415.27258473589
93.99813028 2040.63677534342
94.02413028 2317.61996657965
94.05013028 1965.1956013575
94.07613028 1400.00279910228
94.10213028 936.621947654556
94.12813028 649.02092139304
94.15413028 597.039086232453
94.18013028 556.093826723685
94.20613028 534.439284204402
94.23213028 588.010131335551
94.25813028 685.584291708384
94.28413028 885.365093733724
94.31013028 1187.88063905928
94.33613028 1238.71197936835
94.36213028 1024.42220641774
94.38813028 735.95614932048
94.41413028 572.424547017777
94.44013028 469.897665191682
94.46613028 403.428771994677
94.49213028 352.638901281235
94.51813028 295.847053409477
94.54413028 303.27880451781
94.57013028 308.801886425962
94.59613028 274.029235091419
94.62213028 278.821498487894
94.64813028 271.238309414385
94.67413028 274.70221496094
94.70013028 275.584534691144
94.72613028 279.385366153363
94.75213028 256.133309412319
94.77813028 271.09302591312
94.80413028 277.635749411224
94.83013028 269.199110406824
94.85613028 243.928305667586
94.88213028 238.590918191796
94.90813028 259.696582749069
94.93413028 259.311736286346
94.96013028 256.087090951686
94.98613028 236.042086265063
95.01213028 234.792715422168
95.03813028 238.13434786864
95.06413028 233.176723862515
95.09013028 243.013880095707
95.11613028 241.610617912553
95.14213028 257.663048042651
95.16813028 260.324819983201
95.19413028 244.956556021767
95.22013028 244.638175108748
95.24613028 235.727475741983
95.27213028 235.648026249762
95.29813028 248.732965650707
95.32413028 247.765965084305
95.35013028 228.909499538757
95.37613028 225.676248001149
95.40213028 224.94175024484
95.42813028 222.294839650631
95.45413028 240.116238384287
95.48013028 258.708485686462
95.50613028 264.616466140396
95.53213028 247.419565415126
95.55813028 240.623546285521
95.58413028 246.925589316019
95.61013028 236.619556393113
95.63613028 236.057949566835
95.66213028 257.524349401226
95.68813028 241.430713577226
95.71413028 220.519381744556
95.74013028 229.592859774336
95.76613028 259.894883736296
95.79213028 250.873794213083
95.81813028 237.590082730675
95.84413028 246.520926870912
95.87013028 246.968387807592
95.89613028 255.973304306445
95.92213028 233.083726552181
95.94813028 228.106610232234
95.97413028 209.555157296592
96.00013028 270.569280375009
96.02613028 255.219484217033
96.05213028 234.838472322816
96.07813028 242.585096005477
96.10413028 238.534942296767
96.13013028 254.054789087791
96.15613028 225.676338221119
96.18213028 241.649552307597
96.20813028 226.152001840769
96.23413028 244.097677799457
96.26013028 243.683667396866
96.28613028 233.424661428931
96.31213028 271.419384974938
96.33813028 236.811840807834
96.36413028 248.125412874578
96.39013028 212.335041538865
96.41613028 245.294456215353
96.44213028 221.365989176094
96.46813028 240.907851171547
96.49413028 230.016996389946
96.52013028 229.01146741894
96.54613028 226.064169134565
96.57213028 260.872767852281
96.59813028 247.618514450275
96.62413028 238.460409303401
96.65013028 247.389211181521
96.67613028 213.627043453896
96.70213028 241.329525588626
96.72813028 257.637313606113
96.75413028 259
96.78013028 232.320710342677
96.80613028 222.844288461363
96.83213028 235.041976051218
96.85813028 233.561828890002
96.88413028 246.59392775855
96.91013028 237.244225307303
96.93613028 274.82924318821
96.96213028 254.305123748957
96.98813028 220.462335303908
97.01413028 217.200036088037
97.04013028 254.343989553691
97.06613028 260.879342252615
97.09213028 243.054672826178
97.11813028 238
97.14413028 256.759938977544
97.17013028 261.51904946696
97.19613028 233.238986990343
97.22213028 244.618920440715
97.24813028 235.942998669389
97.27413028 245.118080212456
97.30013028 241.637042945819
97.32613028 247.895064176494
97.35213028 248.973884689305
97.37813028 247
97.40413028 226.813586368142
97.43013028 222.412523407046
97.45613028 231.681970433106
97.48213028 238.107038777706
97.50813028 240.611485462959
97.53413028 250.625010726052
97.56013028 240.434055421696
97.58613028 242.96124604502
97.61213028 243.279463025237
97.63813028 240.494992000411
97.66413028 246.207806829879
97.69013028 244.205794095784
97.71613028 251.642142446137
97.74213028 246.378824767696
97.76813028 229.926424777139
97.79413028 223.98595853263
97.82013028 229.371105183669
97.84613028 254.887348078959
97.87213028 259.767945729121
97.89813028 242.686744628823
97.92413028 247.696389288122
97.95013028 255.22877404371
97.97613028 254.298652589472
98.00213028 272.495514252455
98.02813028 276.000177878914
98.05413028 241.743888262568
98.08013028 236.897925392468
98.10613028 240.634181729833
98.13213028 242.827162789048
98.15813028 254.094865180021
98.18413028 251.89816396347
98.21013028 268.625665746972
98.23613028 258.993113315818
98.26213028 248.237389780936
98.28813028 258.765800226143
98.31413028 257.883168211949
98.34013028 236.118083698955
98.36613028 244.793892695138
98.39213028 271.725872484815
98.41813028 263.073843321883
98.44413028 250.408468410822
98.47013028 268.22557450238
98.49613028 248.315287173786
98.52213028 281.326451843167
98.54813028 274.922718565778
98.57413028 265.730801079197
98.60013028 278.457290447882
98.62613028 242.142056993172
98.65213028 257.574141304326
98.67813028 263.845123922485
98.70413028 260.170840058894
98.73013028 269.822934325625
98.75613028 255.106984133394
98.78213028 246.884086920309
98.80813028 273.423145830598
98.83413028 267.840066045714
98.86013028 259.146314984604
98.88613028 267.774297140482
98.91213028 243.848636672892
98.93813028 243.709743645283
98.96413028 266.827421353795
98.99013028 246.954085214191
99.01613028 246.323932438912
99.04213028 255.391053009684
99.06813028 270.145331172575
99.09413028 278.950195076138
99.12013028 271.029573416792
99.14613028 246.340474242018
99.17213028 270.411468443439
99.19813028 264.234244883905
99.22413028 306.091022713286
99.25013028 310.840075579979
99.27613028 270.718908601316
99.30213028 283.756403672112
99.32813028 315.258524414197
99.35413028 308.022970413667
99.38013028 336.603653103804
99.40613028 346.210106731527
99.43213028 342.61382094039
99.45813028 375.825227254275
99.48413028 392.14608594787
99.51013028 396.542406802532
99.53613028 398.675093283192
99.56213028 362.584528643381
99.58813028 317.385705404086
99.61413028 309.807779763851
99.64013028 310
99.66613028 289.513685354118
99.69213028 291.780128861066
99.71813028 290.159547032376
99.74413028 270.80396077722
99.77013028 295.678086342798
99.79613028 272.775432789911
99.82213028 289.407655504724
99.84813028 272.697793036579
99.87413028 276.879693598727
99.90013028 273.219116363651
99.92613028 258.669316206924
99.95213028 270.969749007251
99.97813028 272.311323322911
100.00413028 241.324294244659
100.03013028 265.941384952727
100.05613028 280.608992100363
100.08213028 253.091217099462
100.10813028 244.573305843208
100.13413028 264.452015629917
100.16013028 267.207648944713
100.18613028 267.305403943506
100.21213028 267.522597793153
100.23813028 262.721421032429
100.26413028 267.156946942423
100.29013028 262.65339733559
100.31613028 255
100.34213028 262.419378001932
100.36813028 248.198668840606
100.39413028 237.671886768862
100.42013028 246.500188693822
100.44613028 255.334528821084
100.47213028 269.76412930376
100.49813028 268.002829126694
100.52413028 257.618501429515
100.55013028 251.043650459952
100.57613028 261.304232718293
100.60213028 268.216555335983
100.62813028 245.791896468312
100.65413028 242.465328363523
100.68013028 249.207726144048
100.70613028 255.564173901697
100.73213028 244.660758600512
100.75813028 244.158336744866
100.78413028 274.942127632485
100.81013028 262.486456949021
100.83613028 252.244247862322
100.86213028 247.320568039542
100.88813028 247.1761885897
100.91413028 236.688334865228
100.94013028 242.336599685988
100.96613028 257.291820549609
100.99213028 259.409491285135
101.01813028 255.384672995531
101.04413028 240.241073437272
101.07013028 256.764919654977
101.09613028 253.764891052175
101.12213028 229.858294352952
101.14813028 246.895860575329
101.17413028 279.264060358044
101.20013028 255.164721170765
101.22613028 241.496230890701
101.25213028 237.393636592367
101.27813028 264.272469613707
101.30413028 252.580554333
101.33013028 240.045978964374
101.35613028 269.143889287078
101.38213028 274.137105843758
101.40813028 260.645442667066
101.43413028 251.792534981977
101.46013028 255.934060188832
101.48613028 237.253002416186
101.51213028 231.752500513295
101.53813028 252.544132369079
101.56413028 270.79145141559
101.59013028 252.94631447235
101.61613028 252.743974996168
101.64213028 269.642977907253
101.66813028 287.71297620113
101.69413028 275.790054640138
101.72013028 261.138518201242
101.74613028 294.801160253464
101.77213028 275.31541040841
101.79813028 288.640300617969
101.82413028 282.249305739087
101.85013028 270.546448777981
101.87613028 265.277298453734
101.90213028 289.300068433302
101.92813028 273.430781242304
101.95413028 265.596585979443
101.98013028 288.526129612086
102.00613028 272.206494226762
102.03213028 289.470144182785
102.05813028 305.126263917727
102.08413028 317.381943623201
102.11013028 254.001784622604
102.13613028 263.28761720248
102.16213028 280.366321453688
102.18813028 269.792435227619
102.21413028 283.311010113841
102.24013028 305.529448901538
102.26613028 301.247234874179
102.29213028 286.42746195284
102.31813028 269.034495963416
102.34413028 263.468121914431
102.37013028 239.56348074371
102.39613028 252.890644813393
102.42213028 276.931959795908
102.44813028 248.140006122001
102.47413028 225.687741461604
102.50013028 240.366537469667
102.52613028 248
102.55213028 255.552167723452
102.57813028 235.99429407529
102.60413028 245.001483508919
102.63013028 256.970381473159
102.65613028 245.062569363897
102.68213028 257.745426415927
102.70813028 239.529733507838
102.73413028 231.87367446496
102.76013028 221.606076240071
102.78613028 222.347941309046
102.81213028 244.683444407886
102.83813028 259.619323869874
102.86413028 239.732779162745
102.89013028 232.036276174275
102.91613028 246.57178327187
102.94213028 266.518610462015
102.96813028 247.331758750424
102.99413028 237.643742216804
103.02013028 258.047756613977
103.04613028 255.521591426102
103.07213028 246.5831960465
103.09813028 241.565422326245
103.12413028 244.682702653365
103.15013028 252.291739863777
103.17613028 246.928337756874
103.20213028 239.19251693796
103.22813028 256.143176135356
103.25413028 269.976094370851
103.28013028 258.912634901526
103.30613028 266.160869169766
103.33213028 279.388837280218
103.35813028 254.220184348013
103.38413028 240.702372846095
103.41013028 254.331374389795
103.43613028 243.904783473854
103.46213028 233.214390764481
103.48813028 229.551386906632
103.51413028 256.6664610387
103.54013028 268.047782655499
103.56613028 262.392643246093
103.59213028 266.59959903283
103.61813028 248.517720356576
103.64413028 246.905267588849
103.67013028 230.977748785837
103.69613028 253.249576399374
103.72213028 268.75994246404
103.74813028 267.769864756621
103.77413028 261.935102131668
103.80013028 244.841162632861
103.82613028 255.814366259732
103.85213028 281.477063881479
103.87813028 258.722095121883
103.90413028 258.929173217998
103.93013028 246.24950873431
103.95613028 261.467408762701
103.98213028 279.450819288411
104.00813028 264.501682662366
104.03413028 230.903760599421
104.06013028 254.998828774781
104.08613028 278.291981921277
104.11213028 273.733239797482
104.13813028 289.943088889489
104.16413028 278.356892810365
104.19013028 281.09485564577
104.21613028 250.608582623427
104.24213028 226.081903792539
104.26813028 251.063378783493
104.29413028 252.95646580167
104.32013028 251.379033810682
104.34613028 282.988464915987
104.37213028 277.047998671478
104.39813028 272.089610355807
104.42413028 273.944311272515
104.45013028 259.566499844863
104.47613028 303.758619401423
104.50213028 268.304449659504
104.52813028 271.594798795587
104.55413028 290.45088346699
104.58013028 290.174756238464
104.60613028 281.87570370632
104.63213028 278.321668113185
104.65813028 304.485650090696
104.68413028 315.856394393974
104.71013028 292.835708299911
104.73613028 326.535877512259
104.76213028 316.136683345892
104.78813028 304.667564598853
104.81413028 313.703176217935
104.84013028 333.081378053987
104.86613028 309.681793479418
104.89213028 306.174217479153
104.91813028 325.023537775765
104.94413028 336.963388061629
104.97013028 348.165449904525
104.99613028 357.030921595696
105.02213028 362.719714534404
105.04813028 344.181443413922
105.07413028 356.550654686372
105.10013028 364
105.12613028 348.506417795799
105.15213028 394.074858297966
105.17813028 445.060775207038
105.20413028 460.02346057643
105.23013028 485.588888950447
105.25613028 499.96392682094
105.28213028 529.367679166854
105.30813028 597.688208144147
105.33413028 672.991028504943
105.36013028 757.805591712106
105.38613028 915.611192958453
105.41213028 1134.85050176699
105.43813028 1379.80767374738
105.46413028 1706.90135026969
105.49013028 2123.27305490344
105.51613028 2502.39922347975
105.54213028 2528.35415667951
105.56813028 2244.3690059305
105.59413028 1915.16294722206
105.62013028 1564.50680237088
105.64613028 1246.97252626537
105.67213028 1040.63361877951
105.69813028 901.768624230281
105.72413028 825.575015827729
105.75013028 790.62630169938
105.77613028 804.689088715265
105.80213028 878.776447766002
105.82813028 982.688997569969
105.85413028 1137.11157255195
105.88013028 1284.47608775324
105.90613028 1398.02143738285
105.93213028 1375.70727468815
105.95813028 1192.7292717493
105.98413028 980.172745354851
106.01013028 790.951884356038
106.03613028 640.151325190047
106.06213028 581.277057321464
106.08813028 490.207401764622
106.11413028 418.180165461362
106.14013028 400.733292805742
106.16613028 323.926379667089
106.19213028 316.999999999828
106.21813028 315.274895311234
106.24413028 305.725692044628
106.27013028 290.126289959251
106.29613028 285.515501140766
106.32213028 284.521717221987
106.34813028 270.81444438429
106.37413028 252.595885848465
106.40013028 257.127754399773
106.42613028 255.040695537375
106.45213028 266.928672595733
106.47813028 294.480931464508
106.50413028 273.394649932426
106.53013028 266
106.55613028 271.548467559846
106.58213028 293.12391634475
106.60813028 247.722633881192
106.63413028 251.794234507009
106.66013028 283.869691545557
106.68613028 231.653497089957
106.71213028 238.088932779856
106.73813028 249.514217140434
106.76413028 263.02126740214
106.79013028 240.553816090666
106.81613028 247.762781124994
106.84213028 245.679002489774
106.86813028 276.855656125945
106.89413028 249.177227045904
106.92013028 255.019615548425
106.94613028 255.689815813024
106.97213028 224.007329175622
106.99813028 239.837578730882
107.02413028 249.799263780984
107.05013028 266.490069453784
107.07613028 247.79836414129
107.10213028 238.448564496816
107.12813028 235.179288376684
107.15413028 237.790944745571
107.18013028 229.716466396517
107.20613028 227.179059339945
107.23213028 250.414248973591
107.25813028 258.343754469185
107.28413028 218.487641194986
107.31013028 252.185152186554
107.33613028 274.35631847527
107.36213028 273.596253701849
107.38813028 250.292614387171
107.41413028 256.804195861874
107.44013028 247.503624244895
107.46613028 246.622494808424
107.49213028 291.874206251298
107.51813028 244.436191390403
107.54413028 258.696260005742
107.57013028 245.3963694512
107.59613028 216.150921760879
107.62213028 242.075400543782
107.64813028 250.032834575303
107.67413028 245.340654682206
107.70013028 252.663361251726
107.72613028 257.424048956791
107.75213028 235.53273005396
107.77813028 255.071555515769
107.80413028 261.859681594142
107.83013028 241.519281990202
107.85613028 263.470998712423
107.88213028 258.120296866999
107.90813028 232.220926102535
107.93413028 227.163230688714
107.96013028 242.077200748396
107.98613028 251.83840465774
108.01213028 253.602879259998
108.03813028 264.673225413498
108.06413028 260.339306503292
108.09013028 263.462247645074
108.11613028 247.782826144105
108.14213028 236.745749159264
108.16813028 259.300365135273
108.19413028 273.533423211927
108.22013028 269.288491725889
108.24613028 261.918528239416
108.27213028 240.364715635236
108.29813028 238.786957414437
108.32413028 252.129506007845
108.35013028 250.843336738492
108.37613028 264.207277604831
108.40213028 261.470564119224
108.42813028 263.097270883779
108.45413028 273.973991416659
108.48013028 244.69593818764
108.50613028 247.060362243606
108.53213028 271.168966141436
108.55813028 267.78902223157
108.58413028 276.307187640864
108.61013028 267.768007346431
108.63613028 247.130792569438
108.66213028 264.677670818118
108.68813028 257.759197223016
108.71413028 260.655158477933
108.74013028 258.600440541709
108.76613028 263.684867224868
108.79213028 260.863526622145
108.81813028 258.657593709721
108.84413028 266.141463589552
108.87013028 262.389353484652
108.89613028 243.672393438878
108.92213028 247.667970589282
108.94813028 266.806202548199
108.97413028 257.70726330344
109.00013028 259.096671432407
109.02613028 258.159098493164
109.05213028 264.558087102713
109.07813028 259.980326320765
109.10413028 262.696999199001
109.13013028 258.762206789896
109.15613028 268.662983864084
109.18213028 274.654358592599
109.20813028 262.732269006225
109.23413028 265.498153404704
109.26013028 258.025747457314
109.28613028 275.267233858012
109.31213028 297.544413488869
109.33813028 278.065265721713
109.36413028 288.608440320291
109.39013028 293.537042689692
109.41613028 277.475660133033
109.44213028 299.428829200281
109.46813028 323.236154377148
109.49413028 328.223851497087
109.52013028 333.370115323879
109.54613028 311.471527937494
109.57213028 337.675706680561
109.59813028 295.102365261574
109.62413028 290.061514400301
109.65013028 343.777615504726
109.67613028 288.864552982938
109.70213028 309.03239557049
109.72813028 310
109.75413028 325.009370512518
109.78013028 331.568980186704
109.80613028 294.352116053216
109.83213028 329.149388730063
109.85813028 319.524052699417
109.88413028 342.877277435466
109.91013028 329.3075138707
109.93613028 340.898073743375
109.96213028 329.260682937933
109.98813028 304.082804357468
110.01413028 335.232234711063
110.04013028 316.302846402327
110.06613028 308.542945561841
110.09213028 332.272875604136
110.11813028 306.83223112531
110.14413028 312.417271561241
110.17013028 304.310065364101
110.19613028 317.926947029188
110.22213028 320.721546828309
110.24813028 329.744307273766
110.27413028 316.727924281193
110.30013028 322.675480205098
110.32613028 329.159385660712
110.35213028 337.808602204213
110.37813028 308.102320151522
110.40413028 313.320793589784
110.43013028 296.836076153288
110.45613028 329.232127983742
110.48213028 370.147582477684
110.50813028 339.028632153371
110.53413028 341.335841424203
110.56013028 351.217032477985
110.58613028 323.556535928744
110.61213028 315.32780002207
110.63813028 344.02910837032
110.66413028 332.822950832891
110.69013028 342.463273080634
110.71613028 355.577509190326
110.74213028 329.802612598459
110.76813028 337.146882346699
110.79413028 338.681793479415
110.82013028 358.001386315974
110.84613028 361.932531569731
110.87213028 369.197051637444
110.89813028 387.465389980835
110.92413028 391.239057216685
110.95013028 409.408300991395
110.97613028 396.432649111987
111.00213028 385.927234196735
111.02813028 369.145867370603
111.05413028 358.888696257875
111.08013028 371.038537938868
111.10613028 348.934482686528
111.13213028 342.824408300416
111.15813028 361.700401735565
111.18413028 362.104268707045
111.21013028 329.648745449087
111.23613028 347.215209718339
111.26213028 344.034441319112
111.28813028 336.048804604564
111.31413028 370.62519116624
111.34013028 382.346528951568
111.36613028 367.90613165276
111.39213028 363.045657146293
111.41813028 339
111.44413028 343.983322866889
111.47013028 359.681786506412
111.49613028 359.981362215844
111.52213028 342.057504514136
111.54813028 367.870661411586
111.57413028 386.450719534057
111.60013028 367.438454791042
111.62613028 373.947498718317
111.65213028 347.496308090033
111.67813028 355.038360059944
111.70413028 364.551309707306
111.73013028 369.344077212516
111.75613028 371.051594668993
111.78213028 408.419007587283
111.80813028 374.293691905782
111.83413028 348.19488101819
111.86013028 382.628258863936
111.88613028 397.785794087438
111.91213028 343.09245506434
111.93813028 367.836904641427
111.96413028 375.56814472558
111.99013028 380.745694514955
112.01613028 376.353383546456
112.04213028 359.635738951719
112.06813028 413.430042049031
112.09413028 437.323810129661
112.12013028 421.699189812021
112.14613028 387.362675934395
112.17213028 439.709063508062
112.19813028 421.048511389267
112.22413028 429.959210756031
112.25013028 427.043363292401
112.27613028 412.365650850733
112.30213028 426.48551476055
112.32813028 447.071352520554
112.35413028 476.375691966197
112.38013028 440.562635748339
112.40613028 503.746838773435
112.43213028 477.852956281626
112.45813028 551.118047197942
112.48413028 558.103755064035
112.51013028 635.110069974412
112.53613028 624.842791931546
112.56213028 712.980196113166
112.58813028 739.848336484592
112.61413028 838.516215928583
112.64013028 1031.70934789997
112.66613028 1226.39704425082
112.69213028 1478.92024754378
112.71813028 1874.17910587156
112.74413028 2154.661458517
112.77013028 2379.73613729998
112.79613028 2389.69548360066
112.82213028 2140.38365382217
112.84813028 1765.06686407084
112.87413028 1470.68361552833
112.90013028 1176.11612931005
112.92613028 1016.42287609554
112.95213028 915.953276719837
112.97813028 800.242549262554
113.00413028 794.703159710684
113.03013028 832.763564503072
113.05613028 820.94954702821
113.08213028 881.479446105037
113.10813028 1003.21239873497
113.13413028 1121.89338884253
113.16013028 1301.14184168799
113.18613028 1401.9920062692
113.21213028 1447.15787867142
113.23813028 1435.35808054283
113.26413028 1237.82145707876
113.29013028 1070.14172912727
113.31613028 913.308906448779
113.34213028 773.944783291967
113.36813028 724.263373247594
113.39413028 683.160047654638
113.42013028 644.062982327329
113.44613028 611.835195582149
113.47213028 595.595989089323
113.49813028 561.84143770488
113.52413028 537.486417886735
113.55013028 523.528452994002
113.57613028 527.250027499867
113.60213028 552.895377385558
113.62813028 550.596640623754
113.65413028 556.449741769794
113.68013028 559.199097386062
113.70613028 558.130925338323
113.73213028 555.939824244344
113.75813028 598.134891750465
113.78413028 620.989575449104
113.81013028 581.974784329003
113.83613028 584.97171407004
113.86213028 590.332896035887
113.88813028 611.977943172005
113.91413028 602.783724858582
113.94013028 643.637613794414
113.96613028 635.37853760014
113.99213028 626.886767696102
114.01813028 653.514758461025
114.04413028 694.787296665017
114.07013028 715.26244920243
114.09613028 767.077101919273
114.12213028 731.877818756029
114.14813028 794.26923705784
114.17413028 808.733153063892
114.20013028 821.206373553402
114.22613028 905.349982645922
114.25213028 955.879877525421
114.27813028 974.252663165599
114.30413028 1025.77349889118
114.33013028 1109.91762162672
114.35613028 1132.00166999699
114.38213028 1223.19448271157
114.40813028 1364.8318302574
114.43413028 1403.05986859435
114.46013028 1454.11248008989
114.48613028 1499.7270748741
114.51213028 1562.25916292787
114.53813028 1606.06872638907
114.56413028 1653.79507694112
114.59013028 1655.42395176371
114.61613028 1706.84525996346
114.64213028 1906.81736629234
114.66813028 1938.41149612106
114.69413028 2065.21555153021
114.72013028 2093.26745499655
114.74613028 2241.68044159959
114.77213028 2501.26296704323
114.79813028 2726.71114461651
114.82413028 2931.18856752932
114.85013028 3294.54708615183
114.87613028 3816.23204174648
114.90213028 4279.6112959848
114.92813028 4934.68747200831
114.95413028 5915.48802213679
114.98013028 6973.65159719851
115.00613028 8396.38874854924
115.03213028 10128.232665456
115.05813028 13017.6090427505
115.08413028 16400.3741668219
115.11013028 21007.5545681456
115.13613028 27686.3983977423
115.16213028 36383.3469229598
115.18813028 47075.7225197176
115.21413028 56954.2877312959
115.24013028 61883.2220499259
115.26613028 60257.9978071188
115.29213028 52627.8827053998
115.31813028 43614.5834554249
115.34413028 34233.4723532575
115.37013028 26723.4453858959
115.39613028 21003.7314541254
115.42213028 17173.7861219649
115.44813028 14474.4691813679
115.47413028 13043.9935878286
115.50013028 12456.7554444799
115.52613028 12615.1918868121
115.55213028 13738.1868064546
115.57813028 16196.2032074432
115.60413028 19321.2743428077
115.63013028 23328.2405496032
115.65613028 27641.8476226779
115.68213028 30501.5245160303
115.70813028 30451.5713651186
115.73413028 27999.4192389837
115.76013028 23958.0929044729
115.78613028 19459.5851540807
115.81213028 15117.8718463133
115.83813028 11699.0173803328
115.86413028 9145.265743455
115.89013028 7160.94274580288
115.91613028 5671.40344625688
115.94213028 4567.29395808652
115.96813028 3823.23859701067
115.99413028 3199.44114040737
116.02013028 2682.90023689329
116.04613028 2309.01441999454
116.07213028 2038.49841381987
116.09813028 1791.02248999956
116.12413028 1589.65224702937
116.15013028 1462.38616788925
116.17613028 1346.2211786195
116.20213028 1239.71714838418
116.22813028 1135.39830242412
116.25413028 1056.88914920881
116.28013028 983.297602037623
116.30613028 930.12197732351
116.33213028 876.369945343169
116.35813028 795.437539569326
116.38413028 781.947646143991
116.41013028 783.723295875133
116.43613028 721.388273404763
116.46213028 696.881635181264
116.48813028 706.062253593564
116.51413028 658.368941537409
116.54013028 625.348367293238
116.56613028 628.707560005249
116.59213028 607.718183354042
116.61813028 566.744016619711
116.64413028 585.665690681387
116.67013028 576.560186570556
116.69613028 589.46849325431
116.72213028 556.795928909507
116.74813028 533
116.77413028 524.709866879885
116.80013028 496.515401386406
116.82613028 488.980551871018
116.85213028 507.082800870964
116.87813028 498.954317737422
116.90413028 478.486537634853
116.93013028 471.194861949658
116.95613028 483.033769790655
116.98213028 486.117142435726
117.00813028 442.018596160612
117.03413028 444.122812784624
117.06013028 433.197800364964
117.08613028 446.920061270262
117.11213028 385.780461138655
117.13813028 395.085255171283
117.16413028 425.771625898957
117.19013028 430.996900213022
117.21613028 417.842166438633
117.24213028 377.770238657769
117.26813028 399.058146514299
117.29413028 414.212416167431
117.32013028 432.391617810515
117.34613028 421.856300687382
117.37213028 441.321213526207
117.39813028 419.937205085864
117.42413028 416.790822436183
117.45013028 397.995651788471
117.47613028 394.035340958797
117.50213028 406.756152080346
117.52813028 386.602276322107
117.55413028 382.154408469776
117.58013028 390.563280309769
117.60613028 371.227380754754
117.63213028 370.931631004811
117.65813028 369.15658257554
117.68413028 386.323941973103
117.71013028 378.07949460227
117.73613028 379.675825503454
117.76213028 380
117.78813028 400.058236734388
117.81413028 391.791725562379
117.84013028 369.5459360602
117.86613028 376.950294830496
117.89213028 344.871268761209
117.91813028 351.982258369034
117.94413028 361.500507950656
117.97013028 367.013206006252
117.99613028 336.291243653255
118.02213028 356.180678179148
118.04813028 344.678141912357
118.07413028 350.44428046386
118.10013028 341.198494448181
118.12613028 333.284462771194
118.15213028 348.863258523127
118.17813028 347.044108533425
118.20413028 341.146637727934
118.23013028 331.558980694782
118.25613028 314.130080342937
118.28213028 346.963700345471
118.30813028 331.317430115487
118.33413028 334.248144048148
118.36013028 345.961420437581
118.38613028 359.233805878759
118.41213028 353.954717680095
118.43813028 320.790322739168
118.46413028 332.0211762568
118.49013028 345.979023251909
118.51613028 322.011896889627
118.54213028 307
118.56813028 331.125995818695
118.59413028 325.855246649029
118.62013028 327.965019921589
118.64613028 336.374737682193
118.67213028 319.839953270599
118.69813028 316.248170089662
118.72413028 315.851052836155
118.75013028 319.584531204648
118.77613028 329.980200524884
118.80213028 333.45538351592
118.82813028 315.991778157671
118.85413028 312.680763632107
118.88013028 311.14267387705
118.90613028 297.472282712782
118.93213028 302.112090606702
118.95813028 308.00292190806
118.98413028 329.59626672261
119.01013028 324.434496987924
119.03613028 320.083455891888
119.06213028 327.295245641195
119.08813028 333.937112304465
119.11413028 303.883628846674
119.14013028 324.917518385867
119.16613028 325.075685150059
119.19213028 302.247489952439
119.21813028 294.749361664031
119.24413028 313.620369299208
119.27013028 305.065265721708
119.29613028 317.338877032613
119.32213028 327.133180129921
119.34813028 324.981674499671
119.37413028 327.593341328066
119.40013028 293.090952486944
119.42613028 281.433841966995
119.45213028 302.504339957898
119.47813028 313.138480064191
119.50413028 303.910066900866
119.53013028 320.694947402619
119.55613028 324.881178033019
119.58213028 298.875245632846
119.60813028 291.51448523945
119.63413028 288.21310932542
119.66013028 322.376928295214
119.68613028 292.467485962046
119.71213028 323.586457205147
119.73813028 323.046804891243
119.76413028 332.987897553887
119.79013028 302.135354235682
119.81613028 295.490792139628
119.84213028 296.999971397221
119.86813028 264.981920043676
119.89413028 255.393704257454
119.92013028 287.941530742369
119.94613028 287.922392335941
119.97213028 306.424871397146
119.99813028 316.971297620113
120.02413028 316.206580960354
120.05013028 326.805128516089
120.07613028 305.023418952874
120.10213028 291.153815066155
120.12813028 286.104545415107
120.15413028 274.369976507237
120.18013028 316.206838599894
120.20613028 278.128390352169
120.23213028 286.333419213176
120.25813028 293.506356178495
120.28413028 276.5284139317
120.31013028 291.37342764034
120.33613028 285.802299389392
120.36213028 282.330629148767
120.38813028 299.597359823264
120.41413028 290.690705918441
120.44013028 284.699882970001
120.46613028 295.901415587853
120.49213028 287.077675329121
120.51813028 309.0774393194
120.54413028 293.491644108007
120.57013028 303.587414975651
120.59613028 302.99755174745
120.62213028 274.330142472509
120.64813028 282.612901306932
120.67413028 309.350960410198
120.70013028 268.830370228609
120.72613028 283.284249316479
120.75213028 292.25904410498
120.77813028 287.613798385365
120.80413028 286
120.83013028 306.624481500996
120.85613028 282.040463939381
120.88213028 295.653777284514
120.90813028 290.283024372191
120.93413028 284.014499540848
120.96013028 281.03053467379
120.98613028 282.258276308933
121.01213028 287.208664846024
121.03813028 297.845349472724
121.06413028 298.024892927664
121.09013028 295.61196609146
121.11613028 272.520291843737
121.14213028 264.105458075562
121.16813028 280.643984274313
121.19413028 305.02375379175
121.22013028 287.757559315284
121.24613028 290.964319790446
121.27213028 297.894738871891
121.29813028 283.869648996772
121.32413028 294.543970997409
121.35013028 298.821595680988
121.37613028 287.474612142437
121.40213028 280.535507097596
121.42813028 288.62547833378
121.45413028 290.538920093642
121.48013028 280.926263405472
121.50613028 281.546790589846
121.53213028 293.855326409611
121.55813028 302.199433150151
121.58413028 293.27032759723
121.61013028 283.007913044982
121.63613028 264.789206158261
121.66213028 270.086161783976
121.68813028 281.767506724167
121.71413028 288.233634973027
121.74013028 285.354919138554
121.76613028 272.07972968678
121.79213028 286.720320958787
121.81813028 287.995148604946
121.84413028 277.839827474716
121.87013028 269.400162396178
121.89613028 286.000625492913
121.92213028 295.522039965315
121.94813028 276.301104328514
121.97413028 266.176175568798
122.00013028 266.382172659938
122.02613028 278.859561846017
122.05213028 284.737301766701
122.07813028 257.517407147507
122.10413028 275.250099576664
122.13013028 261.033124304239
122.15613028 296.666977242995
122.18213028 302.509714530235
122.20813028 277.699544644647
122.23413028 248.947688692781
122.26013028 252.107683339146
122.28613028 289.422565447739
122.31213028 275.679115264886
122.33813028 302.89367786054
122.36413028 266.012380079398
122.39013028 277.567119290006
122.41613028 260.694866716784
122.44213028 277.688192562098
122.46813028 299.642701199192
122.49413028 266.894167098067
122.52013028 300.079040015292
122.54613028 272.887364586217
122.57213028 271.231977071549
122.59813028 274.614021374333
122.62413028 238.716872386952
122.65013028 265.166285365652
122.67613028 275.080474927647
122.70213028 286.961407416666
122.72813028 268.249628482429
122.75413028 302.192877818343
122.78013028 294.29684633709
122.80613028 260.501682662377
122.83213028 283.626484700838
122.85813028 255.945243926726
122.88413028 283.674492906571
122.91013028 287.834811221497
122.93613028 304.334699727014
122.96213028 303.307316923243
122.98813028 252.404592218769
123.01413028 327.627628959278
123.04013028 302.552645790671
123.06613028 289.279153302665
123.09213028 314.28643644301
123.11813028 277.098636495198
123.14413028 271.484314932545
123.17013028 287.54547101373
123.19613028 299.082603923515
123.22213028 308.983380997697
123.24813028 269.213962219006
123.27413028 275.126857321351
123.30013028 266.934289225572
123.32613028 281.207574306656
123.35213028 281.758913541964
123.37813028 283.694021721403
123.40413028 259.489128190405
123.43013028 267.255034218811
123.45613028 252.019838537402
123.48213028 263.973455218612
123.50813028 287.473050508812
123.53413028 298.754894121536
123.56013028 288.951730668236
123.58613028 271.130331934706
123.61213028 276.691066798823
123.63813028 284.279162836929
123.66413028 301.371137272954
123.69013028 311
123.71613028 317.707959947914
123.74213028 292.005387593088
123.76813028 276.129789688896
123.79413028 283.640381303799
123.82013028 275.027367221733
123.84613028 257.036750755009
123.87213028 266.508423556907
123.89813028 278.378924522054
123.92413028 274.347818999663
123.95013028 273.561541722457
123.97613028 274.489408385096
124.00213028 291.523426281278
124.02813028 293.296095048286
124.05413028 286.135670006028
124.08013028 282.814731551826
124.10613028 289.205086991812
124.13213028 304.978842811546
124.15813028 288.70637319801
124.18413028 278.981507080244
124.21013028 277.527745890015
124.23613028 285.936424269055
124.26213028 279.350822518789
124.28813028 266.438957974565
124.31413028 286.395239849553
124.34013028 285.504498768297
124.36613028 261
124.39213028 260.296330132804
124.41813028 262.41912641017
124.44413028 276.635778014012
124.47013028 278.795209710002
124.49613028 251.936437289816
124.52213028 255.813340824144
124.54813028 266.722927096507
124.57413028 281.023347801309
124.60013028 282.538958230694
124.62613028 293.436642490889
124.65213028 276.768284054479
124.67813028 279.57310284799
124.70413028 280.146859791694
124.73013028 298.977575318628
124.75613028 276.96183944878
124.78213028 289.255973846014
124.80813028 256.020034559632
124.83413028 274.802128483315
124.86013028 268.291439675462
124.88613028 285.633113745479
124.91213028 290.7788292787
124.93813028 268.982929897221
124.96413028 250.341779872131
124.99013028 283.39291134512
125.01613028 271.317800530158
125.04213028 265.584889523765
125.06813028 265.191081100217
125.09413028 293.062343813666
125.12013028 261.148021482628
125.14613028 261.91049637155
125.17213028 249.087470900588
125.19813028 301.761171820054
125.22413028 275.652109848768
125.25013028 292.853233914914
125.27613028 247.738326277043
125.30213028 297.89979674865
125.32813028 276.118087185447
125.35413028 263.198768594963
125.38013028 285.420119756456
125.40613028 276.351344770831
125.43213028 268.360454157318
125.45813028 266.109958124493
125.48413028 264.129802709656
125.51013028 282.503527051812
125.53613028 262.033902559787
125.56213028 261.810663534713
125.58813028 295.130150569262
125.61413028 272.435384532087
125.64013028 250.613137316677
125.66613028 282.625703884014
125.69213028 254.626908123752
125.71813028 270.990748310374
125.74413028 286.702260070981
125.77013028 236.964934113236
125.79613028 244.768716086436
125.82213028 278.019918298002
125.84813028 285.796186549029
125.87413028 278.137357435523
125.90013028 241.064611626004
125.92613028 241.729875397988
125.95213028 232.89604194075
125.97813028 260.3561536171
126.00413028 260.686860890436
126.03013028 249.732694990414
126.05613028 271.371479084813
126.08213028 252.017677452399
126.10813028 241.393927246428
126.13413028 261.924198588336
126.16013028 273.031357114152
126.18613028 265.993639054367
126.21213028 281.71823358663
126.23813028 273.226787351127
126.26413028 283.397755767176
126.29013028 291.234954548985
126.31613028 287.764829434878
126.34213028 267.554784320668
126.36813028 252.011296513013
126.39413028 252.351273619265
126.42013028 269.603195030332
126.44613028 266.232680689027
126.47213028 266.161030541422
126.49813028 276.64438770347
126.52413028 270.465102813285
126.55013028 278.791970181143
126.57613028 286.298014075801
126.60213028 278.457799679182
126.62813028 275.002964456836
126.65413028 260.319326587994
126.68013028 253.180097796286
126.70613028 253.499985698603
126.73213028 264.270801252736
126.75813028 291.489063086739
126.78413028 281.196575420661
126.81013028 261.858123447022
126.83613028 255.036350812343
126.86213028 251.365908490257
126.88813028 263.996474228832
126.91413028 243.248274255731
126.94013028 229.905366417991
126.96613028 254.95793721519
126.99213028 247.182255394657
127.01813028 267.957282194268
127.04413028 263.532593798562
127.07013028 278.392740439185
127.09613028 275.957662143173
127.12213028 297.169959487721
127.14813028 290.597267041904
127.17413028 261.968952608419
127.20013028 260.642955352231
127.22613028 270.270305042205
127.25213028 268.396172503764
127.27813028 261.751381371127
127.30413028 268.089148795832
127.33013028 279.155073024968
127.35613028 274.765548634378
127.38213028 277.20611683911
127.40813028 263.401697988269
127.43413028 266.909267015527
127.46013028 266.130783960422
127.48613028 231.987874073644
127.51213028 264.867835771395
127.53813028 284.697524937547
127.56413028 283.28263047729
127.59013028 282.240748132666
127.61613028 265.457647841782
127.64213028 273.211290977498
127.66813028 251.91463461487
127.69413028 259.266369793966
127.72013028 256.252637124058
127.74613028 301.772365092229
127.77213028 272.69031551004
127.79813028 266.959707891792
127.82413028 248.420923128287
127.85013028 257.549619716543
127.87613028 244.889909106632
127.90213028 283.741165863234
127.92813028 262.975968574976
127.95413028 253.075191500793
127.98013028 286.406990949543
128.00613028 260.738820851525
128.03213028 300.433986831395
128.05813028 264.841124495799
128.08413028 264.885738774025
128.11013028 259.402317433411
128.13613028 273.768396829605
128.16213028 260.390359851711
128.18813028 277.063604333738
128.21413028 249.522488504511
128.24013028 253.950020683711
128.26613028 242.772213254808
128.29213028 245.3174552318
128.31813028 237.464312462211
128.34413028 253.716575685152
128.37013028 267.838414192001
128.39613028 280.709424388446
128.42213028 259.397492079859
128.44813028 262.84353019958
128.47413028 270.558244988028
128.50013028 242.987829888784
128.52613028 262.870854872546
128.55213028 270.235731879455
128.57813028 265.473925032223
128.60413028 248.367105756985
128.63013028 255.486521127609
128.65613028 286.084842207858
128.68213028 302.431909918734
128.70813028 247.91651643047
128.73413028 259.435415696158
128.76013028 270.890661320645
128.78613028 264.950195075854
128.81213028 284.281446231296
128.83813028 277.311681642035
128.86413028 270.580802438258
128.89013028 251.035815539547
128.91613028 270.893157244515
128.94213028 275.22959043632
128.96813028 252.073236897507
128.99413028 248.955891466577
129.02013028 275.841007308941
129.04613028 286.818298946552
129.07213028 288.65822268912
129.09813028 288.552800189353
129.12413028 274.080446325007
129.15013028 257.495224523656
129.17613028 260.470395774552
129.20213028 266.418945969975
129.22813028 276.65721283557
129.25413028 266.167153841285
129.28013028 251.26954678041
129.30613028 258.093913457287
129.33213028 254.133602627612
129.35813028 251.08664589897
129.38413028 240.618150083394
129.41013028 246.036466148746
129.43613028 270.561461036621
129.46213028 261.490363594329
129.48813028 271.273394369727
129.51413028 282.405682758155
129.54013028 245.969978044
129.56613028 264.545974197244
129.59213028 269.285095237098
129.61813028 257.787270623499
129.64413028 263.780254656941
129.67013028 282.166772041921
129.69613028 283.0957692314
129.72213028 246.299422946786
129.74813028 279.770583956127
129.77413028 280.637433354227
129.80013028 270.879980766284
129.82613028 282.449212544756
129.85213028 279.787864952355
129.87813028 239.967075204465
129.90413028 241.717869219751
129.93013028 257.430319682323
129.95613028 266.340822101646
129.98213028 276.192075371722
130.00813028 265.675831551227
130.03413028 291.198697443395
130.06013028 285.581644872378
130.08613028 261.219351448162
130.11213028 282.419361494703
130.13813028 309.070743534898
130.16413028 281.956398136593
130.19013028 273.634217305607
130.21613028 261.972552092129
130.24213028 280.80680897259
130.26813028 276.047681975873
130.29413028 306.214713507828
130.32013028 279.656716625054
130.34613028 266
130.37213028 268.648890313653
130.39813028 301.66837145718
130.42413028 265.897534984052
130.45013028 281.881658661525
130.47613028 254.909944591478
130.50213028 252.442115892349
130.52813028 274.162782149501
130.55413028 289.998238857669
130.58013028 283.067694905737
130.60613028 281.039185986802
130.63213028 304.291633136407
130.65813028 290.591563678463
130.68413028 273.839117809472
130.71013028 310.628713450894
130.73613028 343.716252941809
130.76213028 310.085943206709
130.78813028 334.328528755833
130.81413028 336.098971334053
130.84013028 351.148808347194
130.86613028 371.504865696447
130.89213028 427.146969080322
130.91813028 426.386605043802
130.94413028 430.95992042127
130.97013028 447.146908388234
130.99613028 473.284033300505
131.02213028 492.789705855292
131.04813028 469.212974920512
131.07413028 458.189165559217
131.10013028 429.284079335771
131.12613028 419.654116535099
131.15213028 408.963494788982
131.17813028 357.224539532492
131.20413028 348.017554217781
131.23013028 347.773184046076
131.25613028 333.085355850856
131.28213028 336.669128793736
131.30813028 328.599918289651
131.33413028 321.189668742742
131.36013028 323.463302608667
131.38613028 328.413691145761
131.41213028 327.30873625372
131.43813028 332.628936439888
131.46413028 339.917828108446
131.49013028 343.929147176476
131.51613028 370.325070649768
131.54213028 360.695025527184
131.56813028 354.585950535131
131.59413028 377.497436766489
131.62013028 403.242502302017
131.64613028 347.062770722685
131.67213028 329.253243548451
131.69813028 339.726585636566
131.72413028 344.843710639763
131.75013028 340.229042142729
131.77613028 325.398288478719
131.80213028 310.900461303852
131.82813028 314.421777657911
131.85413028 317.404849858302
131.88013028 310.942146701013
131.90613028 301.471228674427
131.93213028 292.641181189131
131.95813028 299.071104415286
131.98413028 293.909270502029
132.01013028 300.115080179833
132.03613028 297.91680615939
132.06213028 279.973310354209
132.08813028 286.903854306141
132.11413028 286.545945594469
132.14013028 287.109851397136
132.16613028 302.62083342045
132.19213028 296.494702271611
132.21813028 290.069894127792
132.24413028 304.143199615577
132.27013028 281.072281688264
132.29613028 284.329084022408
132.32213028 277.791428860578
132.34813028 271.734201054491
132.37413028 278.02601555633
132.40013028 274.028069913978
132.42613028 287.429232629441
132.45213028 284.377818400633
132.47813028 274.714056281017
132.50413028 300.865513314727
132.53013028 303.184446933058
132.55613028 271.960936322583
132.58213028 293.431506489575
132.60813028 301.396866586981
132.63413028 263.206468185236
132.66013028 266.751642497161
132.68613028 278.373247200144
132.71213028 283.357324842328
132.73813028 296.831872806173
132.76413028 285.686286555345
132.79013028 282.38372127279
132.81613028 272.177927177015
132.84213028 267.254179689166
132.86813028 267.476821823977
132.89413028 260.3970556362
132.92013028 301.476856474564
132.94613028 335.57094268814
132.97213028 260.866700121972
132.99813028 295.472892623656
133.02413028 301.135493052327
133.05013028 285.950346913533
133.07613028 267.305141891946
133.10213028 325.080391680727
133.12813028 293.143557009477
133.15413028 300.510637650187
133.18013028 240.115897497704
133.20613028 283.479820931363
133.23213028 285.956510911718
133.25813028 299.556664285873
133.28413028 282.748604327481
133.31013028 282.948488578113
133.33613028 308.341289709366
133.36213028 293.284408126884
133.38813028 291.081278299631
133.41413028 290.091200592213
133.44013028 294.494385576032
133.46613028 290.55522588688
133.49213028 290.879032530043
133.51813028 297.952881899685
133.54413028 332.508329850299
133.57013028 287.044060862102
133.59613028 307.377017590062
133.62213028 298.070420791572
133.64813028 305.653484069198
133.67413028 312.047882409857
133.70013028 301.005187159146
133.72613028 310.635710348946
133.75213028 305.422094353504
133.77813028 296.840901506834
133.80413028 307.159440305015
133.83013028 311.750042726482
133.85613028 305.33891609489
133.88213028 311.032179554507
133.90813028 324.804137731065
133.93413028 309.110100427618
133.96013028 315.008625271485
133.98613028 329.286107651917
134.01213028 324.152373180659
134.03813028 356.886541220632
134.06413028 349.891800456557
134.09013028 339.603279202665
134.11613028 353.817950161702
134.14213028 337.653917026355
134.16813028 342.010534764728
134.19413028 363.389220715788
134.22013028 380.220541741909
134.24613028 380.495853503052
134.27213028 406.230915134987
134.29813028 419.428378099795
134.32413028 413
134.35013028 430.099503120391
134.37613028 451.583444151767
134.40213028 458.531752289688
134.42813028 475.698559907415
134.45413028 499.190523272392
134.48013028 527.581401889676
134.50613028 584.412670832798
134.53213028 633.571379842018
134.55813028 679.527515928032
134.58413028 748.436144429846
134.61013028 832.499264648593
134.63613028 944.421553743725
134.66213028 1020.78552854967
134.68813028 1105.37884454697
134.71413028 1247.03042353472
134.74013028 1320.9160244173
134.76613028 1377.03437529006
134.79213028 1389.0057173095
134.81813028 1302.652333763
134.84413028 1203.80666247214
134.87013028 1062.08679958693
134.89613028 957.389595542163
134.92213028 895.670163052739
134.94813028 773.10435985243
134.97413028 676.998055856207
135.00013028 637.070791206225
135.02613028 615.17869333706
135.05213028 523.326100497043
135.07813028 503.524546348688
135.10413028 489.263850389984
135.13013028 494.570705753259
135.15613028 503.11988390358
135.18213028 493.852087805996
135.20813028 516.36241829488
135.23413028 517.716531500332
135.26013028 496.549647394115
135.28613028 580.439434191299
135.31213028 650.485093188086
135.33813028 615.520283945543
135.36413028 684.157961918483
135.39013028 755.226474142064
135.41613028 765.623070779613
135.44213028 844.987249505962
135.46813028 797.001480947776
135.49413028 771.744407953325
135.52013028 739.630562252075
135.54613028 735.292515557998
135.57213028 637.629305218504
135.59813028 577.438887748222
135.62413028 542.141132237145
135.65013028 485.501979364177
135.67613028 458.450961591538
135.70213028 423.719189721032
135.72813028 363.594352817651
135.75413028 422.578623209909
135.78013028 334.152640354443
135.80613028 359.894660747333
135.83213028 333.377292662077
135.85813028 334.952207810237
135.88413028 342.7294529003
135.91013028 326.743591560743
135.93613028 329.785348109496
135.96213028 321.572267386517
135.98813028 308.955598251262
136.01413028 285.085746259291
136.04013028 297.506365712755
136.06613028 290.032744355351
136.09213028 304.962458893908
136.11813028 327.16826252396
136.14413028 290.986859097585
136.17013028 254.14668981099
136.19613028 275.260537148298
136.22213028 289.209109898733
136.24813028 295.963617098368
136.27413028 300.269388895249
136.30013028 268.703002750753
136.32613028 313.6351741509
136.35213028 289.196143388748
136.37813028 285.998922481379
136.40413028 278.787170869135
136.43013028 260.085917165214
136.45613028 271.453605866324
136.48213028 280.689844415804
136.50813028 286.368279543471
136.53413028 265.020022464083
136.56013028 284.328080216606
136.58613028 296
136.61213028 256.075269625337
136.63813028 263.102099723811
136.66413028 262.298256133302
136.69013028 273.781944647722
136.71613028 275.864649250814
136.74213028 268.167524255931
136.76813028 298.698830567652
136.79413028 293.862846484926
136.82013028 266.211439328396
136.84613028 278.966987545628
136.87213028 272.380292694713
136.89813028 263.792122018556
136.92413028 269.138579818547
136.95013028 280.06861710046
136.97613028 285.252773379445
137.00213028 264.116693896493
137.02813028 262.299219951585
137.05413028 272.921286214539
137.08013028 290.880489997583
137.10613028 301.002990498346
137.13213028 284.651326470689
137.15813028 287.079774796831
137.18413028 304.11087078496
137.21013028 288.452910147067
137.23613028 262
137.26213028 268.604501585691
137.28813028 274.848110934342
137.31413028 278.727288328807
137.34013028 282.252534808446
137.36613028 275.201832806161
137.39213028 268.014161215191
137.41813028 269.992186709345
137.44413028 285.987210443684
137.47013028 279.466731186744
137.49613028 309.582982591771
137.52213028 310.535369206196
137.54813028 267.357296239541
137.57413028 276.704094926132
137.60013028 300.481518820371
137.62613028 277.712492086129
137.65213028 286.33172573591
137.67813028 298.193955336966
137.70413028 314
137.73013028 319.495675624127
137.75613028 329.209139426777
137.78213028 325.54383822852
137.80813028 365.912612346504
137.83413028 353.671767945985
137.86013028 344.119757182453
137.88613028 379.415155586285
137.91213028 394.804382349808
137.93813028 434.906077008451
137.96413028 429.138008969948
137.99013028 439.297880381674
138.01613028 512.847446379153
138.04213028 520.985773680676
138.06813028 566.506621716254
138.09413028 511.613933715512
138.12013028 506.180792804751
138.14613028 427.764694104733
138.17213028 411.511827943892
138.19813028 358.914073300531
138.22413028 371.561134806802
138.25013028 401.21686854502
138.27613028 359.360031659629
138.30213028 347.088423548555
138.32813028 327.40183331841
138.35413028 338.481596019701
138.38013028 317.054566098821
138.40613028 321.141330820671
138.43213028 358.764283702586
138.45813028 308.822393005011
138.48413028 353.775760655781
138.51013028 346.323729443826
138.53613028 352.678754384504
138.56213028 357.720927383169
138.58813028 333.709157214633
138.61413028 319.059227519416
138.64013028 352.747906757788
138.66613028 372.280933513544
138.69213028 398.153498370595
138.71813028 412.500472374879
138.74413028 405.252705714366
138.77013028 428.214599807472
138.79613028 435.4195393736
138.82213028 420.790674084829
138.84813028 397.123993544113
138.87413028 426.829836591826
138.90013028 392.425020673326
138.92613028 352.399611541347
138.95213028 353.748861967007
138.97813028 343.433139274761
139.00413028 366.367221093374
139.03013028 326.53377896983
139.05613028 314.266985752749
139.08213028 323.203135875019
139.10813028 330.414903994517
139.13413028 311.674938884528
139.16013028 308.295836483543
139.18613028 310
139.21213028 300.254205730688
139.23813028 318.644793693913
139.26413028 301.272373345859
139.29013028 295.32997412784
139.31613028 277.993952263461
139.34213028 282.516400780456
139.36813028 281.451083900932
139.39413028 275.373327885978
139.42013028 297.202993571879
139.44613028 313.42731011544
139.47213028 312.015473818612
139.49813028 322.326641817626
139.52413028 306.186392002088
139.55013028 295.37279866093
139.57613028 284.283518021443
139.60213028 269.358118679891
139.62813028 262.626285192115
139.65413028 271.186229705183
139.68013028 274.719569669999
139.70613028 264.461976984781
139.73213028 256.027812274447
139.75813028 264.145040518534
139.78413028 262.753517339824
139.81013028 265.120363606833
139.83613028 277.008164636739
139.86213028 251.454016268468
139.88813028 252.211496533981
139.91413028 270.430642425652
139.94013028 260.307136483038
139.96613028 255.900580126734
139.99213028 255.030812307066
140.01813028 255.821724038127
140.04413028 258.583719223769
140.07013028 247.328547824399
140.09613028 282.381553214798
140.12213028 286.069585330442
140.14813028 268.560413046007
140.17413028 261.922060058355
140.20013028 268.256541208106
140.22613028 251.053459977393
140.25213028 249.575566682287
140.27813028 262.74194668005
140.30413028 240
140.33013028 244.042043716275
140.35613028 255.259547288504
140.38213028 258.246624963294
140.40813028 259.48683782317
140.43413028 250.042314376574
140.46013028 275.021276936407
140.48613028 267.370192523212
140.51213028 265.600040599041
140.53813028 270.281094885189
140.56413028 277.11729683438
140.59013028 263.489260034193
140.61613028 262.282594901503
140.64213028 265.089546177227
140.66813028 239.909444894463
140.69413028 222.175017364489
140.72013028 234.463502117396
140.74613028 264.453603305064
140.77213028 245.915021536774
140.79813028 263.272604943849
140.82413028 266.566622154247
140.85013028 271.650549140373
140.87613028 254.67211580559
140.90213028 263.41344652699
140.92813028 234.618852775642
140.95413028 250.316051483343
140.98013028 290.379044270165
141.00613028 261.586360937304
141.03213028 226.012541451061
141.05813028 233.933163110412
141.08413028 234.981723096219
141.11013028 247.633410447294
141.13613028 256.656906599512
141.16213028 280.798905461865
141.18813028 242.434575112475
141.21413028 294.994586365424
141.24013028 265.801183733719
141.26613028 242.930124940725
141.29213028 255.437516089066
141.31813028 243.613663055218
141.34413028 261.415003748894
141.37013028 259.63711061089
141.39613028 233.120332442775
141.42213028 273.342131218303
141.44813028 259.086913997987
141.47413028 255
141.50013028 248.416268680688
141.52613028 251.065220611664
141.55213028 256.81873097851
141.57813028 262.759197223016
141.60413028 262.433445510824
141.63013028 229.519092015703
141.65613028 247.483575739294
141.68213028 262.028082934749
141.70813028 272.17946881659
141.73413028 280.135660471754
141.76013028 265.353899750746
141.78613028 251.147966838327
141.81213028 250.111696711804
141.83813028 245.448187109173
141.86413028 254.628923419109
141.89013028 247.191491502391
141.91613028 256.941033606611
141.94213028 242.754227005097
141.96813028 238.732381781345
141.99413028 258.226628540741
142.02013028 255.134109297643
142.04613028 276.886118722937
142.07213028 272.022312831495
142.09813028 254.620985257851
142.12413028 255.339325571825
142.15013028 262.74909100374
142.17613028 252.87532980518
142.20213028 257.541806425925
142.22813028 264.548577773706
142.25413028 266.422639160578
142.28013028 275.677083462262
142.30613028 268.692493102305
142.33213028 243.330955378588
142.35813028 259.218437862445
142.38413028 269.147618978692
142.41013028 254.086664967503
142.43613028 255.547777888372
142.46213028 250.190891125769
142.48813028 263.364305233103
142.51413028 270.204032953446
142.54013028 269.112896539812
142.56613028 268.093104037694
142.59213028 267.561983288677
142.61813028 264.373531806399
142.64413028 246.818795157077
142.67013028 255.717808527654
142.69613028 250.796982947884
142.72213028 249.952160138919
142.74813028 234.521158468938
142.77413028 268.75612603882
142.80013028 270.311114279921
142.82613028 244.65551935833
142.85213028 254.394891989927
142.87813028 250.238783069898
142.90413028 262.989861691435
142.93013028 256.336558062438
142.95613028 260.554176971066
142.98213028 280.65385540906
143.00813028 261.596009083069
143.03413028 244.640006477459
143.06013028 279.496082539791
143.08613028 264.686509544304
143.11213028 244.077842748293
143.13813028 252.197861982273
143.16413028 253.563819069076
143.19013028 256
143.21613028 254.991429372828
143.24213028 253.005283427003
143.26813028 267.962246364443
143.29413028 264.074923401762
143.32013028 275.715940657971
143.34613028 265.815163583793
143.37213028 257
143.39813028 257.690473395208
143.42413028 263.733849708372
143.45013028 260.84241105741
143.47613028 257.966917319294
143.50213028 243.410501138685
143.52813028 232.676254974141
143.55413028 209.698265766798
143.58013028 276.058366016774
143.60613028 277.711089262914
143.63213028 262.943969460659
143.65813028 257.003503216146
143.68413028 254.031518485817
143.71013028 244.204284545211
143.73613028 261.453686552159
143.76213028 272.55699656347
143.78813028 281.548242009609
143.81413028 262.262470121784
143.84013028 266.579760495425
143.86613028 260.559735470072
143.89213028 228.1459575907
143.91813028 239.403091277221
143.94413028 270.37894010409
143.97013028 269.59825690168
143.99613028 275.963410616654
144.02213028 246.882358792481
144.04813028 239.448254774245
144.07413028 234.796702753314
144.10013028 246.461057351339
144.12613028 249
144.15213028 272.515884576184
144.17813028 270.791267488898
144.20413028 250.014848325701
144.23013028 261.403639570807
144.25613028 245.177508165826
144.28213028 263.360995477905
144.30813028 253.718747229623
144.33413028 232.429833006057
144.36013028 251.139969621018
144.38613028 250.619304801336
144.41213028 253.405026811989
144.43813028 246.175537055265
144.46413028 256.528326272898
144.49013028 254.135264015585
144.51613028 242.608214770042
144.54213028 254.889396388844
144.56813028 259.739320548284
144.59413028 256.71557280459
144.62013028 251.57396086414
144.64613028 234.685512711542
144.67213028 236.411594239329
144.69813028 258.063110684456
144.72413028 251.407140225682
144.75013028 238.83464031557
144.77613028 253.464453840109
144.80213028 250.366283316635
144.82813028 264.433996365631
144.85413028 277.941121265442
144.88013028 262.404769172458
144.90613028 255.046292173451
144.93213028 262.671909323878
144.95813028 263.463683482804
144.98413028 253.066207910189
145.01013028 249.4503707492
145.03613028 249.579396128547
145.06213028 255.417797299784
145.08813028 254.926199226894
145.11413028 243.556232253927
145.14013028 244.301536360476
145.16613028 256.598079022768
145.19213028 268.515994790029
145.21813028 265.404078575747
145.24413028 256.934405487179
145.27013028 243
145.29613028 254.229350940081
145.32213028 275.186336432523
145.34813028 265.884716824947
145.37413028 239.243641437935
145.40013028 239.68858297049
145.42613028 253.272901645663
145.45213028 256.426110287432
145.47813028 257.572834748969
145.50413028 263.575999639748
145.53013028 259.840265554428
145.55613028 267.92207051784
145.58213028 241.61350168355
145.60813028 235.510488374047
145.63413028 237.735965683326
145.66013028 237.881403583252
145.68613028 229.647136144328
145.71213028 230.17332040074
145.73813028 247.971836379418
145.76413028 243.412868705398
145.79013028 246.202067890682
145.81613028 264.955085533475
145.84213028 245.668112892421
145.86813028 246.028276395708
145.89413028 254.516317533357
145.92013028 240.27235335209
145.94613028 244.272578902347
145.97213028 258.022354455015
145.99813028 242.57436080654
146.02413028 243.245450251547
146.05013028 281.96121744237
146.07613028 268.930641145025
146.10213028 244
146.12813028 242.864033292176
146.15413028 224.937520856201
146.18013028 244.739075004556
146.20613028 263.162024812954
146.23213028 232.914454174673
146.25813028 228.093429342282
146.28413028 240.964439538727
146.31013028 231.126577126802
146.33613028 258.367759852681
146.36213028 279.317451745306
146.38813028 231.163654111665
146.41413028 247.005409222887
146.44013028 256.439577419716
146.46613028 257.927808531831
146.49213028 262.589431196247
146.51813028 242.116829226655
146.54413028 264.247124660323
146.57013028 253.678209577427
146.59613028 242.339832241851
146.62213028 232.317252236586
146.64813028 227.566590064959
146.67413028 271.118369941256
146.70013028 249.652223549111
146.72613028 238.19990075789
146.75213028 256.647919522402
146.77813028 244.016438562103
146.80413028 255.17755583713
146.83013028 250.322139207423
146.85613028 240.210258568923
146.88213028 220.311807437916
146.90813028 235.496498064494
146.93413028 250.990487184357
146.96013028 245.12858032663
146.98613028 260.963429685191
147.01213028 227.711338293426
147.03813028 229.737952375906
147.06413028 248.193532839281
147.09013028 253.689673509873
147.11613028 251.280995130833
147.14213028 247.990513225869
147.16813028 268.117012228103
147.19413028 266.000313209059
147.22013028 266.040682516625
147.24613028 249.20538810534
147.27213028 248.163914312444
147.29813028 260.492656522982
147.32413028 262.198881370083
147.35013028 252.143241239132
147.37613028 250.063698040329
147.40213028 252.429394001106
147.42813028 246.953846642917
147.45413028 248.507614137299
147.48013028 260.030908574934
147.50613028 261.221748542901
147.53213028 255.958010928029
147.55813028 234.046038020428
147.58413028 240.059797442741
147.61013028 250.280714936295
147.63613028 232.074778537362
147.66213028 238.013512242315
147.68813028 247
147.71413028 250.61230790332
147.74013028 244.401211312014
147.76613028 226.251367069733
147.79213028 228.857203813556
147.81813028 243.471095905529
147.84413028 248.607708100028
147.87013028 245.511933746054
147.89613028 242.34915415781
147.92213028 250.627839852738
147.94813028 242.393005051717
147.97413028 231.818524496792
148.00013028 241.793505773234
148.02613028 250.002587069193
148.05213028 249.290194737418
148.07813028 242.308581855063
148.10413028 218.578367206472
148.13013028 231.738035623028
148.15613028 269.079933607228
148.18213028 239.993071692269
148.20813028 225.205522510283
148.23413028 253.277833726547
148.26013028 254.163911751157
148.28613028 231.801535079848
148.31213028 224.92309851469
148.33813028 251.560841591487
148.36413028 256.319933012376
148.39013028 240.516265450319
148.41613028 246.409085294684
148.44213028 230.51657168639
148.46813028 254.12929603964
148.49413028 260.845517817392
148.52013028 242.174475118688
148.54613028 262.979246240862
148.57213028 239.854365152614
148.59813028 258.0589308176
148.62413028 244.66813196096
148.65013028 257.490624720356
148.67613028 242.831172675207
148.70213028 242.266353286862
148.72813028 255.740082296839
148.75413028 223.655761415824
148.78013028 236.162836793814
148.80613028 259.851527416877
148.83213028 228.547357951963
148.85813028 250.314109900535
148.88413028 270.989929356514
148.91013028 269.009773941676
148.93613028 234.518324219718
148.96213028 255.455905767963
148.98813028 238.623769274491
149.01413028 243.732543153009
149.04013028 267.637539156343
149.06613028 245.610518158213
149.09213028 247.702627924361
149.11813028 253.494408131055
149.14413028 245.847688436658
149.17013028 248.583560413383
149.19613028 236.596450649296
149.22213028 235
149.24813028 247.991848384017
149.27413028 247.431397200943
149.30013028 231.766984472121
149.32613028 264.963322957832
149.35213028 256.297752949788
149.37813028 248.100929423841
149.40413028 248.613178940224
149.43013028 231.473322094346
149.45613028 246.668622123713
149.48213028 249.669532222898
149.50813028 270.473208393983
149.53413028 259.589505834309
149.56013028 245.782387139161
149.58613028 252.582734486527
149.61213028 232.002032727841
149.63813028 253.843419985716
149.66413028 231.339039329499
149.69013028 247.68754707545
149.71613028 263.062565877398
149.74213028 266.710398666205
149.76813028 259.987871512371
149.79413028 261.919795732491
149.82013028 238.438855658923
149.84613028 241.861493894286
149.87213028 243.836153352637
149.89813028 255.687779598679
149.92413028 247.755691445602
149.95013028 243.776877236684
149.97613028 270.76706423275
