# Supplementary material for: Properties of a Prototype Corium of Nuclear Reactor
Source: Hindawi journal article supplement (doi:10.1155/2018/5208510), 2018-09-02
Supplement: f1 [file 5208510.f1.zip › 5208510.f1/Tac_1.xrdml]

<?xml version="1.0" encoding="UTF-8"?>
<xrdMeasurements xmlns="http://www.xrdml.com/XRDMeasurement/1.5" xmlns:xsi="http://www.w3.org/2001/XMLSchema-instance" xsi:schemaLocation="http://www.xrdml.com/XRDMeasurement/1.5 http://www.xrdml.com/XRDMeasurement/1.5/XRDMeasurement.xsd" status="Completed">
	<comment>
		<entry>RT-7 for Corium, 45 kV/40 mA. Divergence slit - 1, antiscatter slit - 2; 5 - 153,0000. Step 0,0262606, time per step 30,6 s. mask - 10</entry>
		<entry>Configuration=Reflection-transmission spinner, Owner=User-1, Creation date=08.12.2014 11:29:11</entry>
		<entry>Goniometer=Theta/Theta; Minimum step size 2Theta:0.0001; Minimum step size Omega:0.0001</entry>
		<entry>Sample stage=Reflection-transmission spinner; Minimum step size Phi:0.1</entry>
		<entry>Diffractometer system=EMPYREAN</entry>
		<entry>Measurement program=C:\PANalytical\Data Collector\Programs\RT-7 -for Corium.xrdmp, Identifier={BD797D80-0950-4105-924F-DCB7646D456E}</entry>
	</comment>
	<sample type="To be analyzed">
		<id></id>
		<name></name>
		<preparedBy></preparedBy>
	</sample>
	<xrdMeasurement measurementType="Scan" status="Completed" sampleMode="Reflection">
		<comment>
			<entry/>
		</comment>
		<usedWavelength intended="K-Alpha">
			<kAlpha1 unit="Angstrom">1.5405980</kAlpha1>
			<kAlpha2 unit="Angstrom">1.5444260</kAlpha2>
			<kBeta unit="Angstrom">1.3922500</kBeta>
			<ratioKAlpha2KAlpha1>0.5000</ratioKAlpha2KAlpha1>
		</usedWavelength>
		<incidentBeamPath>
			<radius unit="mm">240.00</radius>
			<xRayTube id="1010041" name="Empyrean Cu LFF (9430 033 7300x) DK405615">
				<tension unit="kV">45</tension>
				<current unit="mA">40</current>
				<anodeMaterial>Cu</anodeMaterial>
				<focus type="Line">
					<length unit="mm">12.0</length>
					<width unit="mm">0.4</width>
					<takeOffAngle unit="deg">6.0</takeOffAngle>
				</focus>
			</xRayTube>
			<sollerSlit id="21010001" name="Soller slits 0.02 rad.">
				<opening unit="rad">0.0200</opening>
			</sollerSlit>
			<mask id="22080002" name="Fixed incident beam mask 10 mm">
				<distanceToSample unit="mm">144.00</distanceToSample>
				<width unit="mm">6.60</width>
			</mask>
			<antiScatterSlit id="22010002" name="Fixed slit 2°" xsi:type="fixedAntiScatterSlitType">
				<height unit="mm">3.03</height>
			</antiScatterSlit>
			<divergenceSlit id="22010003" name="Fixed slit 1°" xsi:type="fixedDivergenceSlitType">
				<distanceToSample unit="mm">153.00</distanceToSample>
				<height unit="mm">1.52</height>
			</divergenceSlit>
		</incidentBeamPath>
		<diffractedBeamPath>
			<radius unit="mm">240.00</radius>
			<sollerSlit id="21020002" name="Large Soller slits 0.02 rad.">
				<opening unit="rad">0.0200</opening>
			</sollerSlit>
			<monochromator id="23010033" name="Diffracted beam monochr. for PIXcel and Cu" hybrid="false">
				<crystal type="Symmetric" shape="Flat">C</crystal>
				<numberOfReflections>1</numberOfReflections>
				<hkl>
					<h>0</h>
					<k>0</k>
					<l>2</l>
				</hkl>
			</monochromator>
			<filter id="20030001" name="Large beta-filter Nickel">
				<material>Ni</material>
				<thickness unit="mm">0.020</thickness>
			</filter>
			<detector id="7010019" name="PIXcel1D-Medipix3 detector" xsi:type="rtmsDetectorType">
				<phd>
					<lowerLevel unit="%">40.0</lowerLevel>
					<upperLevel unit="%">60.0</upperLevel>
				</phd>
				<mode>Scanning</mode>
				<activeLength unit="deg">3.3473</activeLength>
			</detector>
		</diffractedBeamPath>
		<scan appendNumber="0" mode="Continuous" scanAxis="Gonio" status="Completed">
			<header>
				<startTimeStamp>2017-04-14T11:02:08+06:00</startTimeStamp>
				<endTimeStamp>2017-04-14T11:13:07+06:00</endTimeStamp>
				<author>
					<name>EmpyreanUser</name>
				</author>
				<source>
					<applicationSoftware version="5.1a">Data Collector</applicationSoftware>
					<instrumentControlSoftware version="7.6  20140701">EMPYREAN</instrumentControlSoftware>
					<instrumentID>0000000011164593</instrumentID>
				</source>
			</header>
			<dataPoints>
				<positions axis="2Theta" unit="deg">
					<startPosition>10.01813028</startPosition>
					<endPosition>149.98694178</endPosition>
				</positions>
				<positions axis="Omega" unit="deg">
					<startPosition>5.00906514</startPosition>
					<endPosition>74.99347089</endPosition>
				</positions>
				<positions axis="Phi" unit="deg">
					<commonPosition>0.0</commonPosition>
				</positions>
				<commonCountingTime unit="seconds">27.540</commonCountingTime>
				<intensities unit="counts">1082 1080 992 1020 985 1045 1056 991 1041 1009 991 974 977 1006 1086 1032 996 981 978 1000 962 1039 983 1033 1028 1037 1032 967 1027 1012 962 1032 975 960 1014 990 994 966 980 949 1008 965 912 991 976 951 903 943 946 961 908 891 949 928 959 967 935 934 928 927 910 901 928 924 894 943 926 907 920 907 904 933 858 890 900 922 915 865 901 894 874 888 871 906 856 860 843 892 851 847 898 825 862 862 886 882 864 892 857 857 859 850 894 832 832 852 843 881 838 878 821 794 894 882 854 792 852 829 833 864 838 789 821 825 823 824 863 857 849 841 830 869 747 754 767 789 802 821 824 828 826 780 811 816 819 785 792 803 800 789 762 852 851 724 764 820 807 770 788 796 781 763 759 808 749 770 781 795 764 762 814 807 724 747 763 780 733 705 724 710 693 789 737 729 711 761 705 758 768 745 676 754 728 723 762 761 701 732 732 715 714 696 699 698 751 701 718 711 705 776 707 743 703 680 708 666 762 743 704 676 736 669 727 720 677 759 716 720 696 659 705 659 691 695 693 694 660 694 682 724 690 748 658 667 698 652 707 651 650 665 654 714 705 722 656 597 657 657 632 669 648 650 654 655 635 667 654 676 666 690 650 623 620 658 681 627 647 689 664 656 615 667 640 611 663 652 629 667 626 617 612 659 664 641 666 670 667 608 652 639 677 661 637 650 634 632 622 628 629 598 617 628 587 629 596 598 629 573 574 597 580 558 557 589 627 586 633 610 571 597 574 609 602 597 580 599 561 585 579 531 560 591 582 618 612 534 611 539 558 558 562 551 559 558 604 582 524 529 544 550 568 545 567 525 567 549 516 545 559 525 550 546 564 534 558 560 592 529 530 599 570 545 527 546 528 515 548 528 578 565 533 564 490 519 513 527 554 523 578 538 543 511 553 484 462 522 526 549 544 511 515 524 529 466 468 497 520 558 491 517 529 532 499 480 512 510 523 522 490 548 502 493 466 486 504 493 505 474 509 529 505 547 567 533 552 527 541 541 517 578 499 546 482 536 527 482 520 464 479 513 515 498 546 503 531 511 515 498 488 504 502 532 522 513 501 520 483 487 471 510 495 471 512 517 452 472 509 445 483 475 493 528 517 501 498 475 486 529 461 476 473 483 451 509 451 509 455 493 482 500 508 474 437 457 451 483 460 448 441 481 472 430 456 458 497 493 479 480 459 479 487 482 474 483 485 457 417 465 430 483 461 455 433 424 474 453 482 426 418 494 445 431 428 432 445 426 490 443 456 433 430 416 445 447 430 449 432 428 401 418 450 439 405 474 405 407 460 463 426 415 430 422 429 431 397 424 388 416 422 428 428 429 444 410 430 419 399 423 401 418 449 425 419 428 422 379 378 358 441 407 394 386 398 426 418 368 444 406 363 408 414 414 373 424 414 417 407 415 386 395 384 409 412 388 416 375 386 391 408 378 389 408 382 398 387 382 392 376 405 408 397 396 379 401 428 418 380 371 401 349 429 394 432 475 426 463 408 447 472 464 471 500 507 482 515 543 546 568 552 545 663 649 697 698 661 731 776 779 839 901 930 1154 1393 2088 2271 1593 1480 1195 743 589 512 450 420 392 421 370 403 389 400 366 376 399 381 404 403 373 367 353 354 369 349 389 362 384 359 336 371 367 353 390 356 336 377 324 318 394 356 334 375 368 363 362 362 327 347 329 317 333 320 349 336 331 315 359 344 355 318 318 313 355 332 329 317 323 358 343 343 317 328 311 335 354 326 312 310 346 325 325 312 302 307 335 322 315 302 323 312 315 314 314 279 304 319 311 319 320 324 320 298 311 304 330 299 329 328 359 291 362 342 357 379 383 374 375 397 364 329 354 348 338 312 325 336 343 331 288 325 342 302 307 337 321 321 325 297 325 308 309 296 310 351 314 300 346 378 362 366 367 408 368 395 433 506 547 579 615 691 832 852 1006 1214 1567 3391 6737 3085 1982 3527 2065 738 611 462 359 383 391 369 372 370 323 307 316 314 319 307 311 312 332 295 299 312 282 308 348 315 288 279 298 315 288 289 309 280 275 296 276 287 291 318 290 300 321 295 307 274 336 316 299 304 300 293 298 310 306 298 316 322 331 319 331 309 300 346 327 363 318 310 294 305 348 297 284 347 307 327 321 284 292 310 293 329 303 291 299 318 299 289 306 298 299 276 309 292 284 317 314 305 306 336 365 325 313 360 379 414 407 391 422 476 503 511 482 498 467 499 457 410 342 337 327 314 318 330 306 294 288 322 334 309 343 335 426 424 431 479 431 419 411 366 358 326 309 310 287 298 252 265 296 303 264 241 283 284 305 276 249 246 224 282 284 237 280 263 249 257 248 272 246 251 241 293 243 245 279 259 262 246 284 255 234 232 241 235 273 237 238 253 233 255 227 242 254 231 248 274 247 261 264 264 286 306 261 271 258 291 289 274 300 227 274 250 270 238 238 248 296 274 230 221 260 237 252 282 267 242 276 267 269 264 280 269 271 259 269 250 247 273 266 245 244 265 258 251 238 261 247 225 289 261 234 258 246 249 241 281 248 281 255 240 267 247 226 251 278 244 232 266 267 237 257 260 240 260 247 244 260 234 229 249 259 253 247 252 249 241 228 257 268 231 278 254 221 231 239 232 283 220 245 276 236 259 247 265 255 261 265 275 250 262 251 220 266 266 270 236 252 231 247 249 257 279 260 259 258 265 218 286 247 222 270 248 277 259 263 308 280 270 262 257 285 257 281 257 282 290 273 288 266 294 313 358 346 353 398 458 536 714 620 450 360 337 322 316 338 263 297 290 293 275 299 315 295 282 265 288 240 276 249 272 260 260 288 259 268 282 291 253 259 222 240 232 245 268 253 260 250 280 273 230 239 249 235 289 266 253 254 255 266 244 232 260 265 270 254 242 254 292 265 265 270 260 240 270 227 223 241 241 253 271 257 244 253 256 258 262 261 258 258 265 271 257 237 245 281 263 301 268 265 306 294 283 301 257 270 269 275 235 271 289 277 285 256 242 264 261 242 271 278 290 268 290 304 354 372 432 463 488 492 494 490 519 513 461 480 541 523 567 511 555 559 494 557 570 559 574 668 587 646 740 757 777 744 783 775 790 847 885 920 933 1031 1079 1160 1251 1275 1341 1448 1546 1585 1797 1890 2040 2243 2502 2698 2934 3342 3677 4356 5308 6231 7007 8262 10789 14791 23142 41871 85707 128212 96377 50535 40233 57039 64749 40461 18668 9657 6008 4221 3173 2571 2192 1729 1398 1216 1083 924 866 818 871 746 759 721 664 637 616 617 630 561 577 501 521 568 512 504 520 467 453 463 443 474 474 457 419 458 454 429 468 412 413 430 398 378 426 384 386 417 390 401 384 399 387 380 395 377 390 387 368 374 345 354 312 391 363 406 353 399 330 335 343 374 353 352 340 350 376 381 309 348 363 361 345 370 327 369 350 328 321 315 341 392 352 324 325 335 315 339 359 368 361 383 387 353 317 370 344 334 323 299 332 315 326 332 336 291 344 318 341 350 291 336 325 332 313 341 325 319 323 325 295 324 334 313 347 328 317 286 348 317 343 365 305 359 415 466 443 497 416 428 435 427 402 355 347 338 288 278 318 306 355 302 339 282 282 286 300 278 293 296 315 312 266 296 288 292 273 254 296 295 256 282 298 308 286 330 282 291 304 314 325 347 355 368 363 391 418 432 413 381 401 357 329 332 324 309 302 304 313 296 294 322 309 289 294 336 280 282 308 260 289 310 311 309 297 316 292 290 267 291 281 279 326 273 282 279 260 284 246 302 294 279 289 320 283 298 310 313 291 306 302 294 328 302 264 288 326 340 311 306 332 310 313 311 279 290 321 325 312 274 334 287 354 314 331 342 303 332 327 307 331 363 345 342 391 368 402 398 398 397 408 385 390 439 429 489 501 468 485 542 490 564 534 556 591 613 594 640 716 745 888 1014 1081 1058 1138 1298 1465 1827 2537 3883 7736 14276 12073 5925 3416 3353 5240 7579 5415 2559 1284 899 679 529 501 434 390 411 374 371 362 347 327 361 338 338 297 314 328 316 319 337 309 300 302 277 302 292 298 306 337 318 277 282 284 301 332 288 272 317 298 275 326 313 336 281 289 277 331 303 266 258 261 311 282 307 291 279 247 285 258 285 290 310 284 285 293 294 285 286 269 275 291 307 261 269 317 267 273 240 227 306 286 268 268 295 293 305 291 286 325 294 366 371 496 566 505 443 359 354 359 410 376 365 259 266 290 276 247 285 301 276 267 265 231 287 251 261 258 253 256 274 293 254 211 254 214 247 233 214 288 252 196 235 276 280 247 254 262 258 232 252 258 252 256 257 243 252 268 247 272 251 272 261 259 296 298 292 251 263 262 263 231 252 261 235 236 240 256 246 235 245 198 249 252 276 276 236 238 257 251 235 237 252 248 252 234 215 234 240 243 226 231 264 241 245 221 246 254 239 264 212 245 222 220 233 223 258 262 234 207 245 267 269 242 248 242 244 248 218 217 256 262 259 233 227 224 242 234 222 235 251 238 250 244 224 247 255 279 236 266 282 282 294 324 303 322 310 321 328 283 301 333 331 321 277 284 299 291 313 253 290 265 263 289 261 266 217 265 270 228 200 237 233 244 216 226 230 244 223 222 285 248 245 233 252 242 222 252 253 223 255 246 271 239 249 250 251 231 245 239 241 278 271 226 265 263 242 268 249 257 271 271 310 280 288 297 299 312 279 300 307 262 257 281 256 316 272 269 244 246 218 237 253 271 245 256 259 243 259 239 224 238 267 237 231 263 250 235 235 248 256 240 241 228 255 203 219 237 240 249 252 262 252 254 237 238 250 229 241 263 233 228 225 226 236 256 222 232 269 238 263 234 242 249 238 238 242 229 237 245 267 255 231 250 256 250 246 206 237 226 254 237 237 249 254 252 252 239 235 228 276 245 250 239 237 248 234 205 254 231 250 231 207 248 252 239 248 246 252 234 278 251 255 250 273 257 274 241 240 228 240 215 235 266 281 258 237 265 244 215 266 278 289 271 272 276 247 275 284 293 250 273 285 276 258 289 277 299 263 313 322 267 289 324 333 370 377 410 504 699 813 638 426 375 351 344 453 542 518 396 289 321 306 330 279 287 297 310 279 297 297 270 250 296 256 304 275 296 298 315 299 298 273 287 255 276 270 282 295 278 274 264 268 270 261 281 284 259 256 263 269 266 286 267 313 301 277 254 276 295 305 272 256 278 274 268 277 273 265 286 273 278 272 307 297 284 279 264 268 289 233 312 299 320 257 302 273 281 292 289 316 301 297 259 267 265 243 262 280 263 271 278 286 269 269 279 284 292 253 236 295 258 266 270 258 284 292 289 287 294 274 272 295 298 250 249 270 294 289 295 286 326 274 284 285 239 268 277 274 264 277 315 278 307 252 253 277 255 278 289 287 262 298 275 271 283 286 287 303 280 300 275 281 276 282 316 292 295 306 288 256 291 261 255 298 302 270 286 300 258 258 339 269 320 298 265 304 267 249 258 264 275 278 252 315 267 292 298 286 300 293 289 284 294 308 327 297 321 290 297 295 303 308 307 277 310 308 346 310 320 321 311 303 331 327 347 281 331 316 351 318 371 319 328 338 320 346 293 346 320 330 304 290 305 290 318 298 322 326 321 292 302 322 306 315 317 348 295 334 333 339 362 346 349 383 356 390 365 362 416 386 365 463 478 581 597 498 445 398 372 335 356 430 450 373 401 309 317 306 320 315 295 307 325 304 281 284 299 314 292 299 346 312 277 285 281 299 284 298 272 289 331 289 311 295 309 299 341 312 305 332 280 322 344 331 352 338 312 332 345 368 325 337 375 397 386 380 354 375 377 342 375 373 401 396 379 457 471 470 516 465 514 524 600 655 698 789 902 1035 1280 1812 2538 3930 5094 4421 2786 1696 1302 1210 1330 1680 2293 2761 2066 1337 881 643 503 441 403 381 377 358 324 348 326 329 303 317 300 293 320 342 323 285 292 252 314 307 288 256 279 281 305 302 229 280 309 262 281 259 275 258 290 283 290 273 261 252 274 266 245 252 298 278 277 291 300 264 230 287 320 269 263 282 275 291 288 279 297 273 256 271 261 271 277 276 277 264 242 286 260 267 269 261 261 248 296 271 265 302 266 236 267 264 242 277 270 256 269 249 297 244 265 262 271 268 250 254 248 292 253 240 257 264 271 281 276 263 322 234 277 280 290 271 294 265 274 289 285 298 269 298 244 290 286 299 275 277 268 259 272 251 313 294 324 291 275 271 275 284 265 257 275 285 274 268 268 241 244 261 233 250 232 252 296 245 243 259 248 263 249 225 253 282 276 300 293 255 267 271 286 265 287 266 277 247 250 256 277 266 237 271 255 276 262 251 255 240 251 275 258 275 263 265 236 288 264 259 268 258 258 282 237 244 231 278 282 254 242 250 272 247 265 245 250 248 237 269 252 209 238 257 286 303 272 259 271 286 256 269 265 280 279 288 243 278 245 285 292 237 298 272 245 250 233 250 240 257 279 268 312 246 296 259 273 241 272 283 310 274 290 282 292 261 239 286 295 304 255 288 314 322 277 310 307 282 282 289 279 308 310 308 266 272 297 290 264 286 267 235 293 286 298 293 275 247 276 254 277 267 274 286 283 284 262 289 278 291 280 309 281 315 301 315 279 323 318 346 296 290 318 322 331 334 335 370 343 444 531 644 787 893 796 652 567 456 419 390 423 462 564 541 571 470 411 339 350 326 308 290 280 283 253 267 253 259 239 277 257 269 279 295 246 254 229 242 267 249 256 250 287 248 256 260 265 231 266 263 304 273 275 270 262 251 270 264 256 260 264 247 286 267 293 263 269 263 271 252 270 257 229 224 266 242 235 259 250 257 260 244 259 257 250 275 227 249 301 249 268 291 246 227 286 251 256 245 246 241 263 258 278 239 282 245 279 264 236 270 261 230 240 255 265 273 255 237 267 271 250 255 255 279 245 254 236 276 247 259 254 257 271 263 265 261 250 232 275 254 272 254 260 256 264 251 273 270 266 252 240 243 260 265 259 287 287 245 258 240 245 276 233 234 268 273 238 235 238 238 249 234 262 269 274 260 226 254 280 262 238 247 278 240 301 261 280 272 262 240 245 272 256 275 260 234 240 256 248 200 248 297 270 275 251 262 251 249 263 257 254 268 239 258 260 277 268 247 252 237 259 280 248 269 291 282 306 240 279 274 272 268 269 280 271 275 279 341 313 304 278 286 292 287 278 321 321 345 338 334 345 406 403 379 390 489 496 508 607 701 1004 1432 2072 2333 1938 1354 896 622 594 551 532 597 701 920 1242 1238 975 677 545 449 390 341 281 311 308 261 286 265 279 274 282 243 286 273 267 230 244 270 252 259 219 247 231 235 250 234 280 241 249 240 231 241 258 235 221 232 215 233 251 271 254 236 249 243 224 261 250 222 217 261 257 234 248 242 263 232 237 194 273 260 233 244 235 259 223 244 224 244 245 230 274 236 250 211 246 221 241 230 229 226 262 247 238 248 211 244 259 259 229 222 237 233 249 235 283 248 214 218 264 260 238 238 263 261 223 253 229 252 237 253 247 247 216 226 235 240 241 257 229 253 236 244 248 241 261 233 227 221 238 273 245 240 257 253 256 295 249 231 246 232 261 242 270 266 245 255 267 237 234 272 271 241 278 238 282 279 260 288 239 256 265 258 272 257 243 274 269 258 270 244 242 268 247 246 255 270 279 271 246 271 264 308 311 268 285 318 307 340 347 342 381 394 397 399 355 309 310 310 284 294 289 265 306 261 300 262 283 269 254 279 269 227 287 277 239 248 275 262 271 265 261 272 255 255 269 229 246 247 264 276 259 256 245 282 250 240 246 254 258 223 280 266 256 245 252 237 236 257 258 263 235 255 262 228 236 285 258 244 231 266 256 235 268 276 262 251 258 238 230 251 272 253 252 269 288 276 261 295 275 289 282 270 265 291 272 265 291 270 292 307 319 243 267 283 267 287 310 299 283 265 263 232 260 283 235 222 248 248 259 225 255 258 238 269 222 238 211 230 255 263 222 240 252 279 219 255 261 250 243 240 250 255 237 242 275 263 253 286 269 230 259 246 240 220 249 273 257 275 246 255 225 248 269 268 267 244 248 287 258 262 244 258 281 270 228 252 279 272 291 278 283 252 225 251 253 251 283 277 272 274 259 306 266 272 292 290 281 278 308 317 289 333 313 303 316 337 303 307 330 339 351 359 364 337 364 364 342 417 458 461 498 501 545 628 700 794 995 1230 1486 1870 2318 2650 2427 2086 1761 1380 1117 963 837 813 765 852 912 1074 1222 1372 1436 1284 1048 868 658 608 531 410 435 327 317 317 311 292 285 287 277 251 258 254 259 299 275 266 266 301 248 246 291 231 237 248 265 240 248 244 278 249 255 256 224 240 250 267 247 238 235 238 229 227 253 259 213 258 277 273 246 259 245 247 303 229 267 239 209 253 249 244 256 258 226 268 259 233 279 247 224 229 250 253 254 272 252 272 229 243 273 274 265 259 222 256 248 254 276 244 287 257 228 274 267 269 288 234 270 255 263 256 264 263 256 265 269 245 240 270 257 260 256 266 259 264 257 267 277 262 267 256 272 300 277 288 295 276 298 323 328 334 311 338 295 290 345 287 310 310 326 332 291 333 318 346 327 343 327 300 342 311 308 338 299 316 301 323 320 333 311 327 330 341 294 322 285 351 380 317 355 349 308 320 360 314 363 350 314 356 324 388 338 399 376 407 412 379 394 339 384 354 342 344 388 322 342 356 323 360 391 365 374 339 339 356 369 336 359 394 363 382 346 353 363 371 362 414 380 343 379 406 340 367 375 381 378 356 412 438 423 386 440 421 430 427 412 427 448 478 438 509 475 559 558 645 622 727 742 856 1066 1260 1528 1957 2205 2427 2379 2068 1668 1404 1095 987 888 764 808 844 810 917 1048 1162 1380 1415 1467 1415 1119 1036 824 736 715 657 633 593 598 527 548 498 559 546 556 557 562 553 560 653 573 596 567 630 580 645 641 624 633 699 685 789 711 788 812 799 891 953 966 1005 1108 1118 1195 1359 1395 1448 1491 1557 1600 1654 1652 1689 1905 1930 2064 2087 2233 2496 2724 2930 3297 3825 4292 4959 5962 7034 8493 10263 13277 16732 21514 28495 37518 48576 58382 62528 59808 51101 41912 32371 25266 19836 16401 13883 12772 12349 12711 14127 17019 20282 24661 29008 31218 30067 26915 22338 17813 13509 10572 8219 6445 5126 4157 3568 2906 2498 2146 1942 1650 1531 1393 1297 1177 1088 1020 938 920 818 764 808 747 681 723 677 625 626 634 554 594 567 599 566 533 533 501 483 508 504 481 469 480 496 441 447 429 457 385 391 425 432 422 376 398 413 433 421 442 420 417 398 394 407 386 382 391 370 371 369 388 377 380 380 403 390 366 379 338 355 363 368 328 364 339 354 337 332 355 344 340 328 308 365 315 344 347 366 347 305 349 344 307 307 349 308 344 330 311 321 311 328 332 335 295 333 285 313 288 335 322 328 308 358 294 321 332 312 283 319 302 312 330 320 338 299 276 298 317 300 318 331 300 294 280 329 287 324 321 337 303 295 300 266 253 288 287 306 317 316 327 305 291 286 274 318 276 287 294 275 293 285 282 302 289 284 298 285 314 289 307 302 267 287 316 254 293 292 286 286 315 268 308 282 285 279 284 289 303 295 296 257 269 289 317 265 312 286 282 306 292 283 278 300 280 282 281 310 292 295 266 263 281 283 297 265 285 290 284 265 279 302 280 267 264 273 296 250 282 252 294 307 284 250 244 293 270 309 264 280 259 275 303 264 302 273 271 276 238 265 275 287 268 303 294 259 285 254 286 288 306 303 246 339 297 288 319 269 272 291 301 311 258 280 263 287 280 285 250 274 243 273 294 301 283 265 283 285 311 311 322 272 279 287 266 250 280 277 272 275 274 309 277 296 268 314 294 282 275 281 293 259 278 300 261 261 259 269 292 251 254 260 283 276 300 275 282 272 307 271 299 251 277 265 284 294 273 245 285 272 266 262 296 261 263 246 303 275 294 247 298 276 263 286 276 268 266 264 284 260 262 299 269 248 288 249 275 289 226 249 285 286 276 231 245 229 271 257 247 281 240 242 271 274 262 292 263 295 289 287 255 250 254 281 255 275 278 264 292 281 276 274 246 261 245 287 297 261 263 244 262 267 206 269 231 276 253 284 267 295 302 264 257 270 271 261 264 281 273 281 263 265 275 226 261 285 283 285 264 276 251 260 252 304 273 268 248 258 244 284 263 253 287 260 302 263 265 259 275 259 279 246 255 241 246 236 257 270 283 254 265 272 235 271 270 264 243 260 296 305 224 275 269 263 295 268 272 239 290 266 243 253 292 283 293 285 265 251 269 264 289 243 260 256 252 250 229 268 274 244 311 239 257 277 256 261 269 308 232 277 286 268 278 294 241 237 256 262 281 259 291 292 258 276 314 283 276 259 282 272 309 281 266 266 304 265 283 255 252 274 290 283 281 305 290 273 313 346 307 337 336 353 374 435 425 432 450 478 496 463 457 422 419 406 342 350 347 328 340 324 320 325 330 326 336 342 345 385 346 360 389 413 300 351 331 356 327 324 299 329 306 316 286 300 298 289 314 277 284 291 280 298 310 274 318 279 285 283 267 282 269 286 291 267 296 315 267 288 312 263 264 278 280 299 286 284 273 267 269 256 297 343 258 295 302 287 265 326 293 301 240 284 286 300 282 283 310 292 291 290 295 290 291 299 338 278 313 295 308 313 298 314 303 295 311 312 303 314 329 301 321 333 320 375 337 341 361 324 353 370 387 376 428 413 413 444 458 459 491 507 548 622 646 717 785 890 1013 1031 1207 1304 1346 1425 1331 1255 1114 967 939 809 698 631 651 529 509 489 490 508 488 513 528 480 561 661 604 670 756 751 852 800 776 739 745 643 580 546 487 460 426 362 424 334 360 333 335 343 326 330 321 308 283 299 289 307 330 285 249 280 291 297 301 261 327 279 288 276 255 277 282 288 256 296 296 238 275 256 283 272 266 318 279 258 293 258 268 270 288 283 248 275 271 310 292 277 298 311 262 262 277 272 288 274 277 254 296 269 298 331 271 260 312 275 284 292 314 314 335 312 368 359 335 378 385 436 430 425 513 512 575 511 516 429 417 358 369 404 360 348 327 339 317 321 359 308 355 346 353 358 332 318 356 374 401 414 404 432 436 418 393 434 383 345 356 340 374 312 315 326 332 304 310 310 296 329 288 299 267 291 276 275 311 315 310 331 288 301 271 268 258 283 267 262 250 279 245 288 264 236 273 267 251 263 243 276 230 277 292 275 256 274 256 240 272 240 240 255 256 265 242 277 268 265 268 280 264 261 269 243 221 230 267 244 263 266 273 254 265 234 249 291 262 226 234 235 248 257 282 240 299 263 241 257 242 264 259 229 281 255 255 247 252 258 264 262 220 256 264 275 282 259 248 251 243 260 241 265 231 243 267 248 295 257 253 257 267 242 270 260 272 279 259 228 291 246 263 247 254 275 264 276 257 283 236 264 242 266 221 260 286 238 259 244 265 258 252 284 271 233 282 271 242 252 253 256 256 250 269 262 277 267 257 257 264 261 259 244 234 207 276 278 263 257 254 244 262 273 282 261 267 260 225 241 274 269 277 242 239 234 249 249 278 269 245 266 239 271 248 227 260 247 256 242 263 250 239 263 258 256 249 226 243 268 240 238 265 239 285 272 254 256 269 258 248 251 248 264 244 243 246 271 265 266 243 243 273 279 242 234 251 258 253 268 253 277 244 235 237 240 231 225 249 244 241 269 246 244 257 240 242 260 243 239 283 271 244 244 224 244 264 233 228 241 231 259 280 229 248 257 258 263 240 267 252 241 231 227 279 244 237 261 240 259 248 238 215 242 254 242 268 212 237 253 254 250 247 279 259 270 237 255 264 261 246 253 252 243 253 266 257 255 214 266 234 230 247 247 255 231 220 241 247 251 237 251 250 229 237 251 248 252 221 213 277 249 216 251 260 236 218 249 261 238 251 226 252 265 238 267 237 260 243 259 243 241 258 223 235 261 228 250 271 269 234 256 238 244 269 244 248 254 245 249 235 235 250 247 229 272 253 247 249 227 252 249 277 254 243 256 223 266 217 261 264 268 256 265 224 252 239 266 236 249 286</intensities>
			</dataPoints>
		</scan>
	</xrdMeasurement>
</xrdMeasurements>
