# Supplementary material for: Properties of a Prototype Corium of Nuclear Reactor
Source: Hindawi journal article supplement (doi:10.1155/2018/5208510), 2018-09-02
Supplement: f1 [file 5208510.f1.zip › 5208510.f1/Tac_1_kA1.ASC]

10.01813028 721.333333333333 37.982452088651
10.04413028 720.013229723442 37.9476805542432
10.07013028 662.497548996193 36.4004821120873
10.09613028 679.44435161543 36.8631076176556
10.12213028 657.592747307615 36.2654862729735
10.14813028 694.682208150352 37.2741789487133
10.17413028 703.563419126363 37.5116893548228
10.20013028 663.676428749747 36.4328540948893
10.22613028 691.354055311578 37.1847833209117
10.25213028 674.571746842285 36.7306887178088
10.27813028 661.857341776457 36.3828899835199
10.30413028 650.570312475171 36.0713269086451
10.33013028 651.095198311331 36.0858753063115
10.35613028 668.172863797827 36.5560628021626
10.38213028 716.591354872417 37.8573996696133
10.40813028 693.358037994055 37.2386368707034
10.43413028 667.810160351283 36.5461396142269
10.46013028 655.68678973887 36.2128924483773
10.48613028 652.357202532937 36.120830625359
10.51213028 663.90165446722 36.4390355104857
10.53813028 646.360628241338 35.9544330574503
10.56413028 681.970435263715 36.9315701064473
10.59013028 663.482842973677 36.4275402126928
10.61613028 681.059575687406 36.9068984252919
10.64213028 686.12711673986 37.0439500253378
10.66813028 689.844989446095 37.1441782637897
10.69413028 688.859932023691 37.1176489563574
10.72013028 656.275748987124 36.2291525980701
10.74613028 673.553698975289 36.7029617054343
10.77213028 677.544131515327 36.8115235086875
10.79813028 651.255625914876 36.0903207498874
10.82413028 673.645750065303 36.705469621442
10.85013028 662.065507779208 36.3886110693774
10.87613028 643.27435655188 35.8684919268117
10.90213028 663.855113880138 36.4377582702377
10.92813028 665.556483845688 36.4844208901742
10.95413028 661.71412657879 36.3789534368099
10.98013028 650.852996743017 36.0791628711925
11.00613028 649.81422689773 36.0503599676267
11.03213028 640.664034487426 35.7956431563235
11.05813028 656.388926338258 36.2322763937972
11.08413028 654.995334547558 36.1937932399343
11.11013028 622.724682191074 35.290924674513
11.13613028 638.19598140019 35.7266282036296
11.16213028 655.032475402565 36.1948193918015
11.18813028 641.44171943619 35.8173622545321
11.21413028 616.605614680096 35.1171073603762
11.24013028 616.230726631036 35.1064303691229
11.26613028 629.714126578834 35.4884242135047
11.29213028 635.804743301689 35.6596338540285
11.31813028 622.862716894094 35.2948357948891
11.34413028 599.735085112157 34.6333678729677
11.37013028 612.716243715956 35.0061778466589
11.39613028 626.029007762162 35.3844318242405
11.42213028 628.260054812282 35.4474274048846
11.44813028 641.756127509401 35.826139270354
11.47413028 635.187165537469 35.6423109670927
11.50013028 623.043713784725 35.2999635632878
11.52613028 620.968638545595 35.2411304740808
11.55213028 618.390276841542 35.167890947327
11.57813028 613.413825622104 35.0260995722363
11.60413028 604.298225751528 34.7648738168723
11.63013028 607.593388145616 34.8595292035224
11.65613028 617.666945153706 35.1473169716753
11.68213028 608.70053450439 34.8912749696651
11.70813028 607.598332085096 34.8596710278538
11.73413028 624.755208184361 35.3484146231301
11.76013028 613.087385637533 35.0167784251359
11.78613028 607.485795571918 34.856442605978
11.81213028 610.600197630456 34.9456777765278
11.83813028 604.055787628048 34.757899465533
11.86413028 608.379999716341 34.8820870853893
11.89013028 607.720253293714 34.8631683383399
11.91613028 577.881016352942 33.9965003008528
11.94213028 595.105002326377 34.4994203524168
11.96813028 603.75214482692 34.7491624309686
11.99413028 613.519106435603 35.0291052251011
12.02013028 602.133884292699 34.7025614124577
12.04613028 582.092134953936 34.1201446349202
12.07213028 599.658018531745 34.631142589633
12.09813028 593.250445420359 34.4456222304188
12.12413028 584.49874680828 34.1906053414759
12.15013028 589.887783905822 34.3478611824906
12.17613028 584.783826700326 34.198942284823
12.20213028 598.449085895072 34.5962161484481
12.22813028 571.084280348173 33.7959843871479
12.25413028 571.670927836187 33.8133384283832
12.28013028 566.467511149797 33.6591001409663
12.30613028 591.199754422871 34.3860365387717
12.33213028 567.021557439363 33.6755566379938
12.35813028 568.30445136701 33.7136308150579
12.38413028 593.94252641295 34.4657083610057
12.41013028 552.149677368184 33.2309999057562
12.43613028 574.666666666667 33.9018190269097
12.46213028 575.743538623919 33.9335685899352
12.48813028 590.513647454002 34.3660776770932
12.51413028 587.430481053988 34.2762448659123
12.54013028 576.700702232273 33.9617638597371
12.56613028 594.022309036523 34.4680231239485
12.59213028 571.333333333333 33.8033528908992
12.61813028 571.343694322455 33.8036593972444
12.64413028 572.663797932346 33.8426889573611
12.67013028 566.739109726559 33.6671682719696
12.69613028 595.354780013497 34.5066596474796
12.72213028 555.985961710714 33.3462430180887
12.74813028 554.666666666667 33.3066559914581
12.77413028 567.309826484653 33.6841157367877
12.80013028 562.370111837379 33.5371469221035
12.82613028 585.519274163445 34.2204405045711
12.85213028 561.00385688656 33.4963835924585
12.87813028 582.894608427344 34.1436555871613
12.90413028 551.185563442468 33.2019747437549
12.93013028 531.336675177777 32.5986709906333
12.95613028 587.918729218712 34.2904864129604
12.98213028 589.049130834407 34.3234360411194
13.00813028 571.966521408473 33.8220792207834
13.03413028 534.240752164478 32.6876353431838
13.06013028 561.563670718172 33.5130920900526
13.08613028 555.286068044285 33.3252477273398
13.11213028 554.851325820739 33.3121997418585
13.13813028 572.05938106433 33.8248246429846
13.16413028 562.143688307782 33.5303948174722
13.19013028 532.876976701817 32.6458872356631
13.21613028 542.630570932547 32.9433019271762
13.24213028 549.385695253022 33.1477207437562
13.26813028 548.987048763598 33.1356921993067
13.29413028 549.16652742311 33.1411082320163
13.32013028 568.569923228932 33.7215042140451
13.34613028 572.413547135106 33.8352936187971
13.37213028 567.493203962799 33.6895593311281
13.39813028 562.212789523196 33.5324556071635
13.42413028 555.532015740044 33.3326271313872
13.45013028 571.280025193327 33.8017758466424
13.47613028 523.999412952517 32.3728099785149
13.50213028 501.128593038981 31.6584457306097
13.52813028 508.390917679543 31.887016720902
13.55413028 520.875000397226 32.2761521993321
13.58013028 531.552264608129 32.605283762241
13.60613028 542.655832567385 32.9440687398319
13.63213028 548.574935995652 33.1232527386926
13.65813028 550.962344102837 33.1952509887435
13.68413028 551.198724338672 33.2023711303477
13.71013028 532.541610095284 32.6356127595387
13.73613028 532.009651323847 32.6193087395747
13.76213028 542.570632894171 32.9414824467319
13.78813028 545.12253515134 33.0188593125607
13.81413028 533.502840249999 32.6650528929619
13.84013028 525.859973955662 32.4302320052035
13.86613028 531.897671784784 32.6158756370202
13.89213028 534.290176522646 32.6891473282081
13.91813028 529.581188506376 32.5447749571687
13.94413028 516.968791236754 32.1548998206107
13.97013028 537.508691655926 32.7874577134589
13.99613028 567.67874050995 33.6950661228005
14.02213028 527.373465540456 32.4768676303752
14.04813028 494.98785732944 31.463879523334
14.07413028 526.212568004836 32.4411025708078
14.10013028 542.834266105976 32.9494845515367
14.12613028 527.337148287972 32.4757493612687
14.15213028 518.401599087666 32.1994285380243
14.17813028 527.53297699701 32.4817787997212
14.20413028 526.641557723022 32.4543235247023
14.23013028 515.955603445272 32.1233747743064
14.25613028 507.646223175463 31.8636540018706
14.28213028 518.176304542875 32.1924309284923
14.30813028 524.395678854502 32.3850483666306
14.33413028 504.273925373725 31.7576423990738
14.36013028 515.848499018382 32.120040442639
14.38613028 523.775178565405 32.3658826101006
14.41213028 523.321927223289 32.3518755939525
14.43813028 508.915719651792 31.9034706466802
14.46413028 518.513982909684 32.2029185916334
14.49013028 541.297626845487 32.9028152851846
14.51613028 522.316132786006 32.3207714260042
14.54213028 486.860656725625 31.2045079027254
14.56813028 500.81172051437 31.6484350486519
14.59413028 511.541667063928 31.9856738889125
14.62013028 512.362367990781 32.0113219967805
14.64613028 484.301804151087 31.122397213296
14.67213028 472.836188620015 30.7517865698894
14.69813028 480.669451537066 31.0054656967789
14.72413028 471.020596182331 30.6926895589921
14.75013028 474.425136009672 30.8034133176722
14.77613028 519.613690804256 32.2370498279311
14.80213028 490.403743120031 31.3178461302827
14.82813028 484.027489531123 31.1135819066569
14.85413028 479.148452660827 30.9563709972867
14.88013028 501.937498609585 31.6839864477179
14.90613028 474.756184478011 30.8141585793937
14.93213028 506.164578013867 31.8171204861115
14.95813028 510.240279054357 31.9449613884367
14.98413028 491.84392928846 31.3637985355237
15.01013028 455.602497532099 30.1861722492965
15.03613028 501.19337611627 31.6604919771083
15.06213028 485.08308253606 31.1474905100254
15.08813028 483.693976611353 31.1028608527046
15.11413028 507.963179563994 31.8735997202699
15.14013028 505.520998876239 31.7968866047052
15.16613028 468.06464542278 30.5962300103389
15.19213028 488 31.2409987036266
15.21813028 487.823863184931 31.2353601927345
15.24413028 476.662920539234 30.8759751437662
15.27013028 476.002868734288 30.8545902171553
15.29613028 464.170704728746 30.4686955654076
15.32213028 465.951704626713 30.5270930364066
15.34813028 465.356046652817 30.5075743595854
15.37413028 499.11227306279 31.5946917396828
15.40013028 469.130485479618 30.6310458678648
15.42613028 477.943182287672 30.9174119967268
15.45213028 474.344209364542 30.8007860082999
15.47813028 470.334725768533 30.670335041161
15.50413028 512.902756556828 32.0281987179057
15.53013028 476.095530588936 30.8575932499259
15.55613028 492.61057365626 31.3882326248631
15.58213028 471.95654966559 30.7231687709972
15.60813028 455.377157877298 30.1787063300367
15.63413028 469.326649644343 30.637449294755
15.66013028 448.287849725723 29.9428739344013
15.68613028 497.564173901697 31.5456549750262
15.71213028 497.524439621289 31.5443953697416
15.73813028 474.088846900013 30.7924941146382
15.76413028 454.26609766324 30.1418678141631
15.79013028 482.556708542175 31.0662745929465
15.81613028 455.499315640962 30.1827538717382
15.84213028 476.059716520014 30.8564326039163
15.86813028 481.085073877333 31.0188676091611
15.89413028 458.283226205211 30.2748485117667
15.92013028 492.204297257557 31.3752863654679
15.94613028 484.852104313254 31.1400739984109
15.97213028 479.274119996812 30.9604302294659
15.99813028 468.51403670024 30.6109142856021
16.02413028 446.537223129884 29.8843511935556
16.05013028 460.739529046201 30.355873535321
16.07613028 448.898087926301 29.9632470845969
16.10213028 453.801248766053 30.1264418332485
16.12813028 462.44869664881 30.4121257609135
16.15413028 462.455548065673 30.4123510457733
16.18013028 462.432277772109 30.4115858768368
16.20613028 448.194127713468 29.9397437435081
16.23213028 454.247633654683 30.1412552377861
16.25813028 457.717468423313 30.2561553546816
16.28413028 471.711036326054 30.7151765850712
16.31013028 469.093748907533 30.6298465196133
16.33613028 482.770138903406 31.0731439961716
16.36213028 463.929030061103 30.4607626319862
16.38813028 442.080896571734 29.7348582163001
16.41413028 456.221731181878 30.2066791018767
16.44013028 448.491392207995 29.9496708565552
16.46613028 454.439952791372 30.1476351573841
16.49213028 451.570965171771 30.0523198828899
16.51813028 433.653715430265 29.4500837156795
16.54413028 438.428378953549 29.6117672202639
16.57013028 439.669730024106 29.653658459762
16.59613028 455.586399074342 30.1856389388842
16.62213028 473.121573894338 30.761065452755
16.64813028 475.324574439149 30.8325988018898
16.67413028 461.098036972331 30.3676814054788
16.70013028 419.634481609737 28.9701391646549
16.72613028 415.601940558022 28.8306066727019
16.75213028 438 29.5972971738975
16.77813028 430.996601186877 29.3597207475438
16.80413028 431.453613693077 29.3752825924476
16.83013028 440.394969189202 29.678105370431
16.85613028 432.520582734723 29.4115821653553
16.88213028 434.348039355896 29.4736505833904
16.90813028 436.24706164392 29.5380114985393
16.93413028 431.857731022696 29.3890364259428
16.96013028 430.815954788613 29.3535672376838
16.98613028 441.712844902833 29.7224778544062
17.01213028 440.853248334718 29.6935430130767
17.03813028 448.526793313523 29.9508528530833
17.06413028 448.976939366239 29.9658785743465
17.09013028 451.96969552511 30.0655848280093
17.11613028 428.091479079251 29.2606042001614
17.14213028 414.770749668043 28.8017620873461
17.16813028 420.208028348279 28.9899302637408
17.19413028 442.67552446133 29.7548491665251
17.22013028 444.945101623588 29.8310275258358
17.24613028 421.221368830917 29.0248641282235
17.27213028 437.820383685975 29.5912278787473
17.29813028 455.63736538074 30.1873273206072
17.32413028 441.536875815605 29.7165568602961
17.35013028 431.81436455215 29.3875607886109
17.37613028 416.655694912906 28.86713338428
17.40213028 441.389426343741 29.7115945833858
17.42813028 423.338498791213 29.0977146453536
17.45413028 412.957109817756 28.7387233473499
17.48013028 440.883118453381 29.6945489426386
17.50613028 432.483510706954 29.4103216815782
17.53213028 422.688921912617 29.0753820925062
17.55813028 441.317372530047 29.7091693768118
17.58413028 416.657656180784 28.8672013254068
17.61013028 410.991031446078 28.6702295577164
17.63613028 410.90673923931 28.6672893465465
17.66213028 439.609486603378 29.6516268222632
17.68813028 441.548503444045 29.7169481422317
17.71413028 428.383356597445 29.2705776026864
17.74013028 444.141544275383 29.8040783878778
17.76613028 446.580353045293 29.8857943861391
17.79213028 443.359442287853 29.7778253835922
17.81813028 406.017158615366 28.4962158405416
17.84413028 434.550620581167 29.480523081559
17.87013028 426.087846889138 29.1920484683462
17.89613028 457.208069778311 29.9382928146029
17.92213028 440.841354077833 29.693142443259
17.94813028 425.087454464813 29.1577589833243
17.97413028 433.019413406965 29.4285376261535
18.00013028 423.158867440503 29.0915406068673
18.02613028 421.408088153505 29.0312964971771
18.05213028 415.106589384735 28.813420115798
18.07813028 418.363023865499 28.9262173076778
18.10413028 419.276111338028 28.9577661893326
18.13013028 400.64560923274 28.3070877778955
18.15613028 409.994750678201 28.6354588116971
18.18213028 417.818934282132 28.9074016224957
18.20813028 394.764272460797 28.0985505839998
18.23413028 415.540888571452 28.8284889847335
18.26013028 400.531401797321 28.3030529023751
18.28613028 398.45961461202 28.2297578669042
18.31213028 415.918965773789 28.8416007105635
18.33813028 388.538322041362 27.8760944912074
18.36413028 382.543296054207 27.6601986997276
18.39013028 395.010334093844 28.1073063132647
18.41613028 388.988872376997 27.8922524144966
18.44213028 375.15073434765 27.3916313624307
18.46813028 371.483163392677 27.257408658663
18.49413028 387.660429192589 27.8445840045273
18.52013028 411.803728254133 28.6985619240454
18.54613028 397.623327091454 28.2001179817197
18.57213028 413.714393207281 28.7650619052795
18.59813028 410.873467129496 28.6661286932678
18.62413028 388.057916623752 27.858855562415
18.65013028 392.900513623826 28.032142751628
18.67613028 387.329892588251 27.8327107047895
18.70213028 398.672266480831 28.2372897594947
18.72813028 402.845184069214 28.3846854507572
18.75413028 399.112967691377 28.2528925135597
18.78013028 390.563209466608 27.9486389459883
18.80613028 394.852691360645 28.1016971501952
18.83213028 383.212648690672 27.6843872495193
18.85813028 384.022728356165 27.7136330478761
18.88413028 387.534007081285 27.840043357771
18.91013028 366.589570012887 27.0772808831643
18.93613028 365.535303793971 27.0383173956506
18.96213028 385.459114606639 27.7654142633111
18.98813028 390.539145643832 27.9477779311283
19.01413028 401.605282402501 28.3409697223825
19.04013028 413.05697249793 28.5702547033063
19.06613028 379.553806556399 27.5519076129548
19.09213028 383.572154303342 27.6973700666089
19.11813028 382.027848703994 27.6415574345584
19.14413028 365.885487182264 27.0512656702885
19.17013028 371.99999999995 27.2763633939699
19.19613028 373.326481916532 27.3249513052277
19.22213028 371.091604875134 27.2430396569522
19.24813028 369.880459378862 27.198546261845
19.27413028 372.354890772697 27.2893712193116
19.30013028 386.037407483451 27.7862342710721
19.32613028 396.098650915001 28.1459997482769
19.35213028 371.067984089209 27.2421726038585
19.37813028 350.759915568762 26.4862196460258
19.40413028 356.847190447138 26.7150590658953
19.43013028 364.299187008529 26.9925614571322
19.45613028 371.445160181274 27.2560143888014
19.48213028 372.71295566203 27.3024891049161
19.50813028 368.882660379854 27.1618357398705
19.53413028 367.683654376105 27.1176567710452
19.56013028 360.03852143161 26.8342513005901
19.58613028 373.816844040289 27.3428909971235
19.61213028 358.549171177324 26.7786919462966
19.63813028 350.355867066381 26.470960204208
19.66413028 366.309074887491 27.0669198427709
19.69013028 365.664771047894 27.0431052598585
19.71613028 354.983081117799 26.6451902270484
19.74213028 365.895833134703 27.0516481248261
19.76813028 367.349683382857 27.1053383444242
19.79413028 370.615640213536 27.2255629955943
19.82013028 360.148731147866 26.8383580402329
19.84613028 372.332497872214 27.2885506347337
19.87213028 378.441623713624 27.5115111803632
19.89813028 390.973313021312 27.6424683374166
19.92413028 352.81307101761 26.5636244145113
19.95013028 362.978808089686 26.9436006535758
19.97613028 425.920449169406 27.5770440446029
20.00213028 376.83600585549 27.4530874713752
20.02813028 361.174325060265 26.8765446090179
20.05413028 353.486604137712 26.5889677925907
20.08013028 362.079126748891 26.9101886559307
20.10613028 350.698695854351 26.4839081653124
20.13213028 346.41835342011 26.3217914823482
20.15813028 363.595921424253 26.9664948194701
20.18413028 356.012786686648 26.6838073252918
20.21013028 392.75282581864 27.5749012722239
20.23613028 377.863006569675 27.3075538348322
20.26213028 357.206078938995 26.7284896295692
20.28813028 372.019074773198 27.2770627001222
20.31413028 328.03492799537 25.6138606225368
20.34013028 345.75660061956 26.2966385920163
20.36613028 342.475323823599 26.171561811386
20.39213028 352.071428012327 26.5356902307939
20.41813028 368.690952007787 27.1547768176351
20.44413028 349.442558075397 26.4364353904
20.47013028 390.017863538831 27.6601349578235
20.49613028 358.671053632068 26.7832430311218
20.52213028 361.971312656796 26.9061819163105
20.54813028 341.061941238245 26.1175014592991
20.57413028 367.870044599186 27.124529289895
20.60013028 324.431828379094 25.4728022949613
20.62613028 308.708332141551 24.8478704174644
20.65213028 345.671293365233 26.2933943554359
20.67813028 350.484960110798 26.4758365348783
20.70413028 364.803045484171 27.0112215749
20.73013028 362.959948478713 26.9429006782385
20.75613028 342.820617062967 26.1847519393622
20.78213028 343.045788989882 26.1933498808336
20.80813028 348.626824805182 26.4055609599638
20.83413028 352.241087620199 26.5420830991164
20.86013028 316.445698940581 25.1573328848899
20.88613028 311.803308934529 24.9721168079332
20.91213028 328.289481894091 25.6237968261572
20.93813028 344.10043577458 26.2335828957686
20.96413028 367.508775519798 27.1112071114437
20.99013028 335.695266967864 25.9112047951408
21.01613028 341.249750791803 26.1246914160456
21.04213028 351.010250229923 26.495669466157
21.06813028 354.232717972318 26.6170140313416
21.09413028 337.658392741301 25.9868579378616
21.12013028 322.999706476277 25.4165185057386
21.14613028 336.06952053501 25.9256444677856
21.17213028 340.342218023335 26.0899297823254
21.19813028 346.356256312618 26.3194322245985
21.22413028 348.184338735109 26.3887983331985
21.25013028 332.777181765238 25.7983403251154
21.27613028 353.874362737352 26.6035472348088
21.30213028 344.0590993992 26.2320071439148
21.32813028 330.563850304564 25.7124036334437
21.35413028 316.536818846962 25.1609546260456
21.38013028 319.519441891286 25.2792184171618
21.40613028 331.848430191179 25.7623147326159
21.43213028 331.276500584322 25.740104917592
21.45813028 333.74019677948 25.8356419227191
21.48413028 323.765107921874 25.4466150173996
21.51013028 330.334755841897 25.7034922079431
21.53613028 347.392325151425 26.3587679966809
21.56213028 343.154633166262 26.1975049638801
21.58813028 353.034901100091 26.571973998937
21.61413028 372.328766781495 27.2884139070594
21.64013028 365.199335103307 27.0258888883717
21.66613028 362.360963696971 26.9206598617854
21.69213028 358.918489485545 26.7924798958792
21.71813028 356.326371157335 26.6955566024511
21.74413028 360.666666666667 26.8576494379782
21.77013028 352.424686616704 26.5489994770689
21.79613028 365.211526062006 27.0263399690748
21.82213028 359.248630487464 26.8047992153444
21.84813028 347.87451542846 26.3770550072771
21.87413028 343.714791134026 26.2188783564067
21.90013028 338.091775781062 26.003529598155
21.92613028 354.599793347535 26.6308014655036
21.95213028 337.963302181787 25.9985885071397
21.97813028 332.372217115906 25.7826382325745
22.00413028 330.769270190834 25.7203915285453
22.03013028 313.492341606358 25.0396622024483
22.05613028 328.535513453769 25.6333967102984
22.08213028 342.528074989525 26.1735773248337
22.10813028 338.957148571631 26.0367873813814
22.13413028 344.038773023372 26.2312322632152
22.16013028 353.499704887234 26.5894605017565
22.18613028 341.985518673924 26.152839948041
22.21213028 349.38073627681 26.4340967796068
22.23813028 341.564059964411 26.13671976222
22.26413028 339.631864467178 26.0626884441026
22.29013028 329.88881399006 25.6861368831539
22.31613028 328.6053931617 25.6361226850591
22.34213028 335.604222244896 25.9076908366954
22.36813028 340.404887141591 26.0923317141872
22.39413028 352.820075125522 26.5638880861037
22.42013028 346.397601368502 26.3210030723946
22.44613028 339.942846831989 26.0746178047537
22.47213028 337.131476809984 25.9665737751434
22.49813028 340.813277499325 26.1079787612647
22.52413028 322.606339382018 25.4010369623769
22.55013028 322.34714692609 25.3908309011773
22.57613028 319.395849760427 25.2743288639056
22.60213028 338.023896094882 26.0009190643286
22.62813028 326.996990433117 25.5733060214403
22.65413028 318.858932012866 25.2530763279592
22.68013028 341.892811709224 26.1492948933322
22.70613028 337.823413791958 25.9932073354543
22.73213028 303.306652368011 24.6295210009456
22.75813028 318.072556997217 25.2219173338276
22.78413028 333.865414722529 25.8404881812449
22.81013028 299.661878596432 24.4810897876885
22.83613028 321.422347961186 25.3543821838035
22.86213028 317.847316243019 25.2129853941583
22.88813028 330.730854016003 25.7188978774754
22.91413028 351.424018883379 26.5112813301575
22.94013028 343.934713739188 26.2272649637429
22.96613028 333.882603411261 25.8411533570489
22.99213028 331.252101305917 25.7391569910872
23.01813028 316.951593867514 25.1774340975213
23.04413028 324.829367276579 25.4884039232188
23.07013028 351.804919710038 26.5256449388149
23.09613028 307.424201647907 24.7961368623384
23.12213028 317.324978722093 25.1922598717183
23.14813028 315.354848840736 25.1139343329848
23.17413028 321.86213302478 25.3717217793661
23.20013028 301.319516562445 24.5487073615881
23.22613028 337.766380917414 25.9910130975079
23.25213028 302.617281062407 24.6015154436635
23.27813028 336.999056957772 25.9614736468396
23.30413028 305.863827664165 24.7331287007594
23.33013028 326.634583688427 25.5591308024521
23.35613028 321.994331358597 25.376931704152
23.38213028 332.132632690104 25.7733440860942
23.40813028 338.080103042574 26.0030807037387
23.43413028 318.717800700909 25.2474870314219
23.46013028 294.535689862119 24.2707927296213
23.48613028 302.803365903131 24.6090782396713
23.51213028 301.265346066042 24.5465006086832
23.53813028 318.595367628259 25.2426372484437
23.56413028 309.265888003437 24.870299073531
23.59013028 300.102160487374 24.4990677572586
23.61613028 294.88367542746 24.2851261239245
23.64213028 315.352498326583 25.1138407387872
23.66813028 315.921888298666 25.1365028712693
23.69413028 292.802191808281 24.1992641131205
23.72013028 300.029831364729 24.4961152579232
23.74613028 305.014706022563 24.6987734927289
23.77213028 324.862121166186 25.4896889414597
23.79813028 329.356840181976 25.6654179853739
23.82413028 321.841548700968 25.3709104567009
23.85013028 319.81422689773 25.2908768886225
23.87613028 310.040147243803 24.9014114958893
23.90213028 315.3532768191 25.1138717373128
23.92813028 323.021725167205 25.4173848051763
23.95413028 322.394496079102 25.3926956457601
23.98013028 317.750779286999 25.2091562447853
24.00613028 319.970839546593 25.2970685869566
24.03213028 322.869179064699 25.4113824521493
24.05813028 311.35004255573 24.9539593073216
24.08413028 287.812274310362 23.9921768212208
24.11013028 297.907757464956 24.4093325375749
24.13613028 295.715447008707 24.319352253245
24.16213028 307.946973525124 24.817210702459
24.18813028 313.312192035443 25.0324665998157
24.21413028 305.00362033152 24.6983246529606
24.24013028 294.936579284546 24.2873044731006
24.26613028 285.291164674925 23.8868652055863
24.29213028 301.088712423623 24.5393036748651
24.31813028 308.40165287822 24.8355250751105
24.34413028 312.301124559214 24.9920437163196
24.37013028 301.81193885464 24.5687581637591
24.39613028 281.264148253961 23.7176789865265
24.42213028 304.154528763235 24.6639221845689
24.44813028 313.224497837509 25.0289631362351
24.47413028 292.156750303383 24.1725774506312
24.50013028 286.386767269221 23.9326875744961
24.52613028 286.568961971893 23.9402991615348
24.55213028 291.929799873071 24.1631868706539
24.57813028 291.048795378724 24.1266987123694
24.60413028 302.500004767133 24.5967479463092
24.63013028 313.391624166693 25.0356395630986
24.65613028 298.91916039691 24.4507325205978
24.68213028 297.807986245564 24.4052447742515
24.70813028 287.878857283821 23.9949518559142
24.73413028 283.082830944331 23.7942358962977
24.76013028 284.565162053975 23.8564524627605
24.78613028 297.152183751545 24.3783585891891
24.81213028 293.985557427795 24.2481156970101
24.83813028 291.027714227608 24.1258249279733
24.86413028 295.543796059644 24.3122930247085
24.89013028 287.134803617742 23.9639230351686
24.91613028 279.671859019824 23.6504485800935
24.94213028 270.785512659248 23.2716786098145
24.96813028 284.9532109992 23.8727129166
24.99413028 297.911763864623 24.4094966709526
25.02013028 286.437023910382 23.9347873986957
25.04613028 282.186084840767 23.7565184671815
25.07213028 304.270340617949 24.6686173353088
25.09813028 270.326760403573 23.2519573543206
25.12413028 279.641896356792 23.6491816499765
25.15013028 307.117118101699 24.7837494379563
25.17613028 303.35584885161 24.6315183799785
25.20213028 282.493871696077 23.7694708269274
25.22813028 278.621255064383 23.605984625276
25.25413028 285.677138414948 23.9030181531516
25.28013028 282.152866521505 23.7551201437292
25.30613028 286.220922616036 23.9257569416742
25.33213028 283.802554159243 23.8244644917464
25.35813028 267.291919450211 23.1210691556516
25.38413028 279.404464643898 23.6391397746999
25.41013028 261.018718778408 22.8481386015758
25.43613028 277.797655329771 23.5710693575735
25.46213028 281.757966159482 23.738490523177
25.48813028 285.333333333333 23.8886304895586
25.51413028 285.390875747583 23.8910391464073
25.54013028 286.763913287926 23.9484410051229
25.56613028 294.493368512551 24.2690489518049
25.59213028 274.08728991502 23.4131283648734
25.61813028 286.32475402565 23.9300962816972
25.64413028 278.843971220452 23.6154174733563
25.67013028 266.428477854153 23.0836945853194
25.69613028 281.752755591556 23.7382710234573
25.72213028 267.411933181509 23.1262592384289
25.74813028 278.632813865585 23.6064742757399
25.77413028 299.066541041537 24.4567594354419
25.80013028 283.698638885668 23.8201023879272
25.82613028 279.464348891753 23.6416729057719
25.85213028 285.077276240214 23.8779092987729
25.87813028 281.543727232406 23.7294638469733
25.90413028 254.458928664022 22.5592078169435
25.93013028 252.048295373287 22.4520954644901
25.95613028 239.764871366837 21.8981675656589
25.98213028 288.893416971406 24.0371968819747
26.00813028 273.650091920657 23.3944477139623
26.03413028 263.6384793289 22.9625120284737
26.06013028 257.984290788476 22.7149418131976
26.08613028 264.277518809967 22.9903248698215
26.11213028 281.351216650623 23.7213497360763
26.13813028 279.476380803114 23.642181828381
26.16413028 250.72478977215 22.3930698999557
26.19013028 287.302256722141 23.9709097333472
26.21613028 275.266903050996 23.4634568233667
26.24213028 247.489969699431 22.248144628235
26.26813028 265.957014095242 23.0632614387142
26.29413028 275.154579375706 23.4586691598524
26.32013028 276 23.4946802489415
26.34613028 254.986126260435 22.5825652334023
26.37213028 274.468517516846 23.4294053495536
26.39813028 277.673628842665 23.5658069601983
26.42413028 277.478066762037 23.5575069462809
26.45013028 273.13925941042 23.3726018838477
26.47613028 275.169006911229 23.4592841711434
26.50213028 262.954180936705 22.9326919892413
26.52813028 261.529398597452 22.8704787268414
26.55413028 258.277572600522 22.7278495507394
26.58013028 267.324993758817 23.1224995949321
26.60613028 274.005821332562 23.409648495121
26.63213028 264.112186020813 22.9831323374693
26.65813028 270.795011291974 23.2720867690018
26.68413028 259.845180891092 22.7967182239502
26.71013028 254.619179859221 22.5663102814448
26.73613028 259.399886233465 22.777176569253
26.76213028 267.580493877856 23.1335468044939
26.78813028 259.997574302474 22.8034021278613
26.81413028 256.328125943495 22.6419136092113
26.84013028 266.683504863035 23.0947398713662
26.86613028 262.113856943016 22.8960196079151
26.89213028 260.644609221867 22.8317589870718
26.91813028 261.296261305565 22.8602826450403
26.94413028 256.198041568711 22.6361675894446
26.97013028 258.204434912035 22.7246313462742
26.99613028 255.778741928281 22.6176365665505
27.02213028 260.542532598414 22.8272877319411
27.04813028 271.001796718084 23.2809706291677
27.07413028 268.399508845822 23.1689235332944
27.10013028 264.345964150735 22.9933018138211
27.12613028 258.660509878422 22.7446921227095
27.15213028 259.431068101433 22.7785455243057
27.17813028 275.456497464079 23.4715358451073
27.20413028 282.39090264286 23.7651384444888
27.23013028 267.736794788235 23.1403022792804
27.25613028 250.804213222887 22.3966164061845
27.28213028 255.565287849855 22.6081970908719
27.30813028 253.408584980852 22.5126002487874
27.33413028 253.560167502031 22.5193324724349
27.36013028 277.090613544765 23.5410540777071
27.38613028 272.088350072665 23.3275952499466
27.41213028 298.37693953695 24.428546397072
27.43813028 313.390311711521 24.5378772349095
27.46413028 292.439494717958 24.1842715299824
27.49013028 296.485289210305 24.3509872165506
27.51613028 280.37972440739 23.680359980684
27.54213028 303.206246666839 24.6254440230766
27.56813028 328.81930734822 24.7050896078707
27.59413028 326.100427095524 24.616965611387
27.62013028 321.982227524921 25.2271487086131
27.64613028 338.354562961068 25.7965702343258
27.67213028 338.444452469075 25.7374703627961
27.69813028 327.277723851722 25.5618814856545
27.72413028 353.056770259703 26.2782548859107
27.75013028 376.598016155618 26.6608319937766
27.77613028 383.866987859082 26.7945568255768
27.80213028 385.057223695462 27.2785981371902
27.82813028 361.713249579486 27.192674312725
27.85413028 376.21068909568 27.5573915876613
27.88013028 471.759823316409 29.1394131166535
27.90613028 474.886569189498 28.9787137461593
27.93213028 496.102839413856 29.9703894103585
27.95813028 456.622532619637 30.4632520686187
27.98413028 431.311107618719 30.1795677245142
28.01013028 495.024886689896 31.2892111010946
28.03613028 552.092708740168 31.6330586365845
28.06213028 562.200061854416 31.7721798426078
28.08813028 591.007130955104 33.164584941828
28.11413028 627.081385326083 34.3565933663418
28.14013028 664.743188934843 35.1135503575053
28.16613028 872.370054869041 38.355137322657
28.19213028 1120.18309914908 41.8953243889458
28.21813028 1740.2453105524 49.5546499336335
28.24413028 1774.85264442347 52.0273207340095
28.27013028 953.831966609818 47.1631169034036
28.29613028 600.925098672772 48.4255796216689
28.32213028 402.596778554494 44.4309461642315
28.34813028 308.835228462912 34.2883563721405
28.37413028 313.592047580873 29.4277187308169
28.40013028 323.364725036034 26.5132918865614
28.42613028 296.989298510485 24.619273177984
28.45213028 280.698108806904 23.6938012487192
28.47813028 262.1701176813 22.8984767039775
28.50413028 279.608166173467 23.6477553342159
28.53013028 248.865525481728 22.3098868433584
28.55613028 267.025585231891 23.1095471713269
28.58213028 260.122157763697 22.8088648452174
28.60813028 265.974112563878 23.0640027993355
28.63413028 246.365527070771 22.1975461288301
28.66013028 249.904774793313 22.3564207686881
28.68613028 264.095506871779 22.982406613398
28.71213028 255.609540393933 22.6101543733754
28.73813028 267.124556565946 23.1138294778665
28.76413028 268.769315300883 23.1848793527542
28.79013028 251.944571544783 22.4474752052333
28.81613028 245.361936812616 22.1522882254911
28.84213028 237.048238404612 21.7737566076509
28.86813028 235.8708919189 21.7196174882938
28.89413028 243.964155857678 22.0890993866965
28.92013028 235.513422757517 21.703152893417
28.94613028 253.37522668279 22.5111184387977
28.97213028 245.533656588919 22.1600386547009
28.99813028 252.431987426475 22.4691783306144
29.02413028 243.553264618969 22.0704900090129
29.05013028 228.034478602401 21.3557710515168
29.07613028 240.962389212921 21.9527852088486
29.10213028 245.421234013027 22.1549648617653
29.12813028 238.066927109688 21.8204916126877
29.15413028 252.530752278813 22.4735734710265
29.18013028 244.421871672937 22.1098110201303
29.20613028 228.302025669451 21.3682954710689
29.23213028 242.242971380329 22.0110413829209
29.25813028 228.101543366563 21.3589111785485
29.28413028 213.409675211824 20.6596067344867
29.31013028 244.30805115943 22.1046624565692
29.33613028 246.764005832352 22.2154903539108
29.36213028 228.272056650277 21.3668929257521
29.38813028 239.282382063583 21.876123151216
29.41413028 247.209474574032 22.2355334801768
29.44013028 243.373175194819 22.0623287617068
29.46613028 241.614583234018 21.9824740752272
29.49213028 241.333333333333 21.9696760710454
29.51813028 228.30678684444 21.3685182848245
29.54413028 225.311443616375 21.22787995144
29.57013028 224.872101589545 21.2071733896597
29.59613028 215.105223844815 20.7415150770051
29.62213028 216.864974863821 20.826184233499
29.64813028 217.591534458851 20.861041894347
29.67413028 222.975771627525 21.1175648040926
29.70013028 228.430187530265 21.3742923873641
29.72613028 222.403659256113 21.0904556259988
29.75213028 215.664214073863 20.768447899343
29.77813028 223.465690714485 21.1407516760632
29.80413028 234.841979879211 21.6721932383047
29.83013028 232.554229054092 21.5663733183904
29.85613028 226.077494580523 21.2639363515095
29.88213028 212 20.591260281974
29.90813028 210.635179416352 20.5248717129414
29.93413028 219.853335376785 20.9691838361337
29.96013028 230.692775621186 21.4798871329058
29.98613028 220.573974738651 21.0035223112054
30.01213028 216.375277295257 20.8026573925187
30.03813028 212.772672182045 20.6287504314752
30.06413028 223.497956457248 21.1422778553896
30.09013028 235.266765396488 21.6917848687695
30.11613028 228.666666666667 21.3853532431273
30.14213028 223.117477274572 21.124274059696
30.16813028 213.60830382798 20.6692188448417
30.19413028 215.263255824197 20.749132792683
30.22013028 211.979391959044 20.5902594427095
30.24613028 226.885780705987 21.3019145010953
30.27213028 230.950030526354 21.4918603441561
30.29813028 214.900956660621 20.7316645091812
30.32413028 207.665747341626 20.3796833803485
30.35013028 212.44507949544 20.6128639201563
30.37613028 227.434837946024 21.3276739447144
30.40213028 216.666666666667 20.8166599946613
30.42813028 214.837997196731 20.7286274121916
30.45413028 206.659479794155 20.3302474059789
30.48013028 201.970519127636 20.0982844605024
30.50613028 208.049690986574 20.3985142099406
30.53213028 221.848636672893 21.0641228952403
30.55813028 213.913518650785 20.683980209369
30.58413028 208.687289744306 20.4297474161726
30.61013028 203.314953188697 20.1650664858164
30.63613028 214.368105459427 20.7059462695829
30.66213028 208.24339938044 20.4080082017055
30.68813028 209.925481734908 20.4902650902768
30.71413028 209.333333333333 20.4613456709637
30.74013028 207.18823437558 20.3562390620458
30.76613028 187.366841998226 19.3580392601227
30.79213028 203.387548939758 20.1686662394794
30.81813028 212.335115014772 20.6075284794063
30.84413028 207.61196609146 20.3770442454964
30.87013028 212.694880899711 20.6249790739148
30.89613028 213.419730818628 20.6600934566438
30.92213028 215.940061961589 20.7817257205262
30.94813028 213.149201079938 20.6469949910363
30.97413028 198.689478886726 19.9343662496065
31.00013028 207.270152351019 20.3602628839128
31.02613028 202.746991227638 20.1368811501502
31.05213028 219.529665225932 20.9537426359079
31.07813028 200.099177815767 20.0049582761758
31.10413028 218.393747659992 20.8994616035912
31.13013028 218.704601050832 20.9143300658105
31.15613028 237.952306710842 21.8152381014209
31.18213028 197.479159317308 19.8735582781397
31.20813028 237.231026510975 21.7821498714417
31.23413028 229.287876621001 21.4143819252857
31.26013028 236.934869608434 21.7685493135594
31.28613028 253.844443434968 22.3390331475771
31.31213028 273.481125309137 22.1699800111842
31.33813028 245.92649632573 22.4616682857372
31.36413028 248.007595577073 22.3986606743318
31.39013028 257.846587346673 23.0061716624579
31.41613028 245.889395184331 22.2051726690499
31.44213028 223.439278701982 21.1395022979247
31.46813028 232.90181033651 21.5824841172887
31.49413028 232.783254689564 21.5769902761976
31.52013028 226.704906433149 21.2934218214522
31.54613028 211.738076464241 20.5785362192864
31.57213028 214.711635232157 20.7225305033993
31.59813028 222.272979153407 21.0842585429702
31.62413028 227.521349368605 21.3317298580591
31.65013028 222.70944608971 21.1049494711411
31.67613028 199.604398653243 19.9802101416999
31.70213028 209.878597011592 20.4879768162497
31.72813028 224.768704536218 21.2022972593169
31.75413028 209.200975952182 20.4548759933754
31.78013028 203.650137030705 20.1816816460227
31.80613028 218.369042999267 20.8982794985265
31.83213028 217.46457041015 20.8549548266185
31.85813028 214 20.6881608655772
31.88413028 215.747605170331 20.772462789488
31.91013028 204.618646602333 20.2296142623795
31.93613028 209.862803936144 20.4872059557249
31.96213028 209.576702640408 20.4732363167335
31.98813028 205.743775179039 20.2851559116039
32.01413028 200.750249208197 20.0374773466221
32.04013028 202.894303045028 20.1441953448147
32.06613028 222.68115434892 21.1036089022195
32.09213028 219.792651243594 20.9662896690661
32.11813028 204.050187813924 20.2014943909565
32.14413028 217.054623067466 20.8352884821625
32.17013028 242.319076703672 22.0144987089723
32.19613028 246.279632769001 22.1936762510856
32.22213028 242.736965694199 22.033472976097
32.24813028 244.344293228495 22.1063019624946
32.27413028 256.925867725228 22.7729789748293
32.30013028 258.730796529462 22.7495402780837
32.32613028 254.093446703304 22.5430009849312
32.35213028 285.971261778523 23.2435322041454
32.37813028 338.213930255466 24.4119440684366
32.40413028 396.111462894299 25.5608066433845
32.43013028 421.159665594063 26.4848503349547
32.45613028 430.704670118345 27.5456667741436
32.48213028 455.140626917166 28.9790360938419
32.50813028 542.098797186884 30.9444077885834
32.53413028 626.257117408831 32.4659000732305
32.56013028 688.5320896787 33.7321595588624
32.58613028 824.54997053972 36.7236878017465
32.61213028 1043.10898918182 40.637736156413
32.63813028 1900.27172250491 50.7420237451874
32.66413028 4190.14488278249 70.6078666549078
32.69013028 4968.81685036008 77.2343043181932
32.71613028 1852.17826733436 59.7708108812641
32.74213028 635.750333445818 65.8901432929484
32.76813028 665.875569486875 73.8803762883162
32.79413028 402.247282417078 53.9456247501588
32.82013028 252.53926907747 33.87817559745
32.84613028 239.289860824493 29.9469273781511
32.87213028 203.742840105302 25.74735650145
32.89813028 243.627453784584 22.0738512174285
32.92413028 256.711787923316 22.6588520416775
32.95013028 257.021443502079 22.6725139101106
32.97613028 246.477231300917 22.2025778368602
33.00213028 247.695075522831 22.2573617269806
33.02813028 239.811839954076 21.900312324443
33.05413028 213.105613091053 20.644883777394
33.08013028 205.86022554746 20.2908957686673
33.10613028 210.414661083266 20.5141249427445
33.13213028 209.93027298323 20.4904989194129
33.15813028 211.313389847565 20.5578885028383
33.18413028 205.091299492816 20.2529651899575
33.21013028 207.43287667815 20.3682535666733
33.23613028 209.858569661845 20.4869992757282
33.26213028 218.139729342492 20.8873037677194
33.28813028 196.985461705278 19.8487007990588
33.31413028 200.283424006449 20.0141661833037
33.34013028 206.005928913674 20.2980752246943
33.36613028 189.556208536737 19.4708093584595
33.39213028 207.462905844083 20.369727825579
33.41813028 230.461393115423 21.4691123764082
33.44413028 208.91974108818 20.4411223316226
33.47013028 191.699447451549 19.5805744273016
33.49613028 186.508817451806 19.3136644607804
33.52213028 199.009471737448 19.9504121129087
33.54813028 209.634146154054 20.4760419101961
33.57413028 192.006935280669 19.5962718536292
33.60013028 192.67307504667 19.6302356097256
33.62613028 205.874111145584 20.2915800836497
33.65213028 187.041036495477 19.3412014360782
33.67813028 183.430954164148 19.1536395582744
33.70413028 196.784413747773 19.838569189726
33.73013028 184.6550777921 19.2174440439981
33.75613028 190.900277068748 19.5397173505017
33.78213028 193.816065547812 19.6883755321668
33.80813028 210.579841181263 20.5221753808539
33.83413028 194.991306755031 19.7479774536549
33.86013028 199.341718017899 19.9670587727837
33.88613028 212.478695741443 20.6144946938528
33.91213028 198.722172629625 19.936006251485
33.93813028 203.638593266186 20.181109645715
33.96413028 185.712158954731 19.272371880738
33.99013028 217.868044577429 20.8742925426194
34.01613028 212.777014037399 20.6289609063277
34.04213028 201.239581247715 20.0618833237418
34.06813028 202.072931206773 20.103379377944
34.09413028 200.501447814799 20.0250566947911
34.12013028 196.257171041279 19.811974714363
34.14613028 197.973708280958 19.8984274896765
34.17213028 204.924188200312 20.2447123071834
34.19813028 204.607285602336 20.22905265218
34.22413028 199.934156765107 19.9967075672525
34.25013028 207.695746434199 20.381155336938
34.27613028 213.636670752184 20.6705912229033
34.30213028 219.062139039454 20.9314184440259
34.32813028 214.88541517688 20.73091484604
34.35413028 218.368539815742 20.8982554207638
34.38013028 210.358759517893 20.5113997337039
34.40613028 201.842662649172 20.0919218916047
34.43213028 220.944329487281 21.021147898594
34.45813028 222.141430338097 21.0780184238508
34.48413028 233.914944337434 21.6293755960469
34.51013028 222.40398835565 21.0904712301859
34.53613028 208.569183490329 20.4239655057645
34.56213028 199.91087143486 19.9955430751385
34.58813028 200.571845742936 20.028571878341
34.61413028 220.920654910803 21.0200216417968
34.64013028 211.477976541933 20.5658929561511
34.66613028 192.854889183601 19.6394953694641
34.69213028 213.850595616435 20.6809378712105
34.71813028 216.031412066877 20.7861209496566
34.74413028 212.185330065476 20.6002587394176
34.77013028 215.784090150684 20.7742191261517
34.79613028 200.579972479561 20.0289776314
34.82213028 192.182042011551 19.6052055338143
34.84813028 200.957193681679 20.0478025569726
34.87413028 200.83806602397 20.0418594957638
34.90013028 207.438117319443 20.3685108596305
34.92613028 210.762975748115 20.5310971819879
34.95213028 198.123828685935 19.905970395132
34.97813028 196.531195315607 19.8258011346633
35.00413028 205.219239835203 20.259281321666
35.03013028 206.239775870775 20.309592604027
35.05613028 196.367785040457 19.8175571168828
35.08213028 197.595646115301 19.8794188101816
35.10813028 201.733399153235 20.0864829750375
35.13413028 198.943376910791 19.9470988823333
35.16013028 193.121139538053 19.6530475773124
35.18613028 192.694857182523 19.6313452000887
35.21213028 201.633283797657 20.0814981412073
35.23813028 192.664660288743 19.6298069419311
35.26413028 197.373319205469 19.8682318893992
35.29013028 210.622270111938 20.5242427442251
35.31613028 207.259677424639 20.3597483984768
35.34213028 203.55712468369 20.1770723685915
35.36813028 210.515294658992 20.5190299312122
35.39413028 230.106287180504 21.4525656824774
35.42013028 235.175462725621 21.6875753705029
35.44613028 214.298683825005 20.7025932590584
35.47213028 217.630367628949 20.8629033276267
35.49813028 244.059957996378 22.0552457765793
35.52413028 272.316698351943 22.4570583574626
35.55013028 304.590819379495 22.7995802380694
35.57613028 288.808303048187 22.7443912294485
35.60213028 269.689802262339 22.9558483162831
35.62813028 290.559901920217 24.03968829354
35.65413028 333.806622737882 25.0976260042279
35.68013028 365.265732925334 25.3779712078457
35.70613028 365.803299270531 25.3925925187786
35.73213028 329.775234610338 25.3022538475791
35.75813028 318.596306469193 25.8153832469835
35.78413028 290.085447352834 25.5852118997006
35.81013028 318.462470838925 25.8136073689746
35.83613028 288.25780253176 24.7367910533833
35.86213028 248.42314860475 23.5140819881308
35.88813028 227.575603728931 21.3342730707625
35.91413028 223.884022741739 21.1605303686717
35.94013028 217.068556099967 20.8359571942336
35.96613028 209.593472009537 20.4740553877114
35.99213028 212.701037687956 20.6252775830027
36.01813028 218.75668130539 20.9168200884069
36.04413028 203.457718993349 20.1721451012702
36.07013028 195.768548667 19.787296362414
36.09613028 193.086652255089 19.6512926931074
36.12213028 214.970812651359 20.7350337666163
36.14813028 222.198400741586 21.0807210854651
36.17413028 206.411936359597 20.3180676423521
36.20013028 247.846759716055 20.9289564565097
36.22613028 223.342244918612 21.134911635425
36.25213028 311.369356406823 23.2060483171019
36.27813028 308.82007468515 23.2221012689305
36.30413028 312.024136689534 23.442178527404
36.33013028 346.998314110394 24.6380014815176
36.35613028 278.730407445901 24.252684419014
36.38213028 265.09396862192 23.966120746662
36.40813028 248.879535658311 23.9636911987003
36.43413028 210.404182290368 22.9976140364592
36.46013028 222.4798106379 22.2480501224149
36.48613028 219.48573542519 20.9516460176851
36.51213028 207.255916260555 20.3595636623458
36.53813028 206.586174377854 20.3266413545305
36.56413028 193.336797795606 19.6640177886212
36.59013028 197.635724531865 19.8814347838311
36.61613028 172.615496202881 18.580392687071
36.64213028 175.276294102608 18.7230496502364
36.66813028 193.812768813382 19.6882080857239
36.69413028 201.158729786028 20.0578528155946
36.72013028 180.945056513535 19.0234096057219
36.74613028 163.73512386603 18.0961390283138
36.77213028 182.785572805983 19.119914895521
36.79813028 189.18669242731 19.4518221474139
36.82413028 200.114962210653 20.0057472847506
36.85013028 188.636248254497 19.4235037135166
36.87613028 170.495108262032 18.4659204082565
36.90213028 164.519301058722 18.1394212178185
36.92813028 153.28706805516 17.509258582542
36.95413028 177.192855571734 18.8251350896472
36.98013028 188.947443457192 19.4395186903993
37.00613028 167.379310590202 18.2964100626435
37.03213028 177.801156221622 18.8574206200966
37.05813028 178.950755228305 18.9182850823379
37.08413028 169.071661389367 18.3886737634538
37.11013028 169.525179359928 18.4133201438484
37.13613028 167.427040308905 18.299018569798
37.16213028 175.591358050506 18.7398696927436
37.18813028 170.392459627769 18.4603607563757
37.21413028 166.070939865533 18.2247600733471
37.24013028 163.257602219479 18.0697317201711
37.26613028 181.516495649219 19.0534246606335
37.29213028 175.616163936167 18.7411933417361
37.31813028 162.775457052445 18.043029515713
37.34413028 176.291197926381 18.7771775262621
37.37013028 178.510023944395 18.8949741436391
37.39613028 173.770318489845 18.6424418191311
37.42213028 168.886361397256 18.3785941463027
37.44813028 177.476860269454 18.840215512008
37.47413028 179.240192012347 18.933578215031
37.50013028 162.830085622323 18.0460569445141
37.52613028 155.33038073505 17.6255712381216
37.55213028 157.620419603262 17.7550229289214
37.57813028 158.737187212597 17.8178105957268
37.60413028 168.635338463714 18.3649306268069
37.63013028 170.899393319495 18.4878010222684
37.65613028 158.301735323849 17.7933546766116
37.68213028 163.093473598579 18.0606463670921
37.70813028 162.896554658536 18.0497398684045
37.73413028 161.534929584412 17.9741441846009
37.76013028 162.292275444996 18.0162302075099
37.78613028 155.363248561983 17.627435920291
37.81213028 164.477887175601 18.1371379867719
37.83813028 163.458413621902 18.0808414418081
37.86413028 158.229879311364 17.7893158559493
37.89013028 171.630574110625 18.5273081752652
37.91613028 176.305825587442 18.7779565228724
37.94213028 167.872272495504 18.3233333482478
37.96813028 174.667070949587 18.6904826555971
37.99413028 176 18.7616630392937
38.02013028 180.600799714582 19.0053045076675
38.04613028 194.716914627322 19.7340778668436
38.07213028 195.184610865976 19.7577635812344
38.09813028 175.892826745907 18.7559498157735
38.12413028 178.291985099363 18.8834311023904
38.15013028 177.809747387903 18.8578762000339
38.17613028 193.661123821145 19.6805042527444
38.20213028 190.224318251069 19.5050925786611
38.22813028 186.728084182286 19.3250140585866
38.25413028 189.079674188659 19.446319661502
38.28013028 158.053329532866 17.7793886021351
38.30613028 179.393935926936 18.9416966466542
38.33213028 169.26164504869 18.3990024212559
38.35813028 176.05971016384 18.7648453318347
38.38413028 158.666666666667 17.8138522878499
38.41013028 159.765710006046 17.8754418130599
38.43613028 170.291227999747 18.4548762119797
38.46213028 195.206491902426 19.7588710154414
38.48813028 178.704037720574 18.9052393648202
38.51413028 152.58232934985 17.4689627253509
38.54013028 150.32970432131 17.3395331148973
38.56613028 171.718384570266 18.532047084457
38.59213028 158.954004528314 17.8299750155918
38.61813028 169.70956320508 18.423331034592
38.64413028 187.244441323275 19.3517152378426
38.67013028 176.906107081819 18.8098967079471
38.69613028 162.596122403546 18.0330875006775
38.72213028 183.725266060434 19.168999246723
38.74813028 178.047822263128 18.8704966687752
38.77413028 179.246851984117 18.9339299662863
38.80013028 176.170902529953 18.7707699644928
38.82613028 186.621934656254 19.3195204213901
38.85213028 179.361364801854 18.9399770222592
38.87813028 180.648340312585 19.0078057814459
38.90413028 172.856003131812 18.5933323065992
38.93013028 179.109404328502 18.9266692436098
38.95613028 167.217814148547 18.2875812587968
38.98213028 164.773534538398 18.1534313306547
39.00813028 180.901825373191 19.0211369467333
39.03413028 177.675299764906 18.8507453308831
39.06013028 164.498144724194 18.1382548622625
39.08613028 162.728748737476 18.0404406119959
39.11213028 175.224031083522 18.7202580689221
39.13813028 172.527182559762 18.575639023181
39.16413028 167.906819925143 18.325218684924
39.19013028 159.817706396686 17.8783503935171
39.21613028 171.811403273461 18.5370657480336
39.24213028 166.091464042569 18.2258862084986
39.26813028 152.38449426285 17.4576341044742
39.29413028 185.306604933676 19.2513170943536
39.32013028 177.40524313637 18.8364138379029
39.34613028 159.4622285765 17.8584561805605
39.37213028 168.763706806211 18.3719191597509
39.39813028 165.697524937548 18.2042591136002
39.42413028 165.55577418045 18.1964707666322
39.45013028 161.904187745902 17.9946763097257
39.47613028 180.881133468317 19.0200490781868
39.50213028 170.87468865877 18.4864647057662
39.52813028 181.573687571105 19.0564260852399
39.55413028 174.709889126505 18.6927734232513
39.58013028 162.816466652644 18.0453022503168
39.60613028 172.75175875877 18.5877249150492
39.63213028 168.686550005701 18.3677189659305
39.65813028 155.026456268797 17.6083194126411
39.68413028 161.977736073443 17.9987630726916
39.71013028 179.370687026229 18.9404692141578
39.73613028 170.400089537094 18.4607740648703
39.76213028 157.475488373351 17.7468582218573
39.78813028 169.150099865875 18.3929388552169
39.81413028 177.752701801001 18.8548509302514
39.84013028 165.617391821609 18.1998566929308
39.86613028 166.122774884508 18.2276040600244
39.89213028 172.531904980846 18.5758932480162
39.91813028 165.475152917667 18.1920396282367
39.94413028 167.725883181243 18.3153423763381
39.97013028 168.397502467898 18.3519755049912
39.99613028 163.547473359806 18.0857664122816
40.02213028 168.529859849052 18.3591862482547
40.04813028 163.977630816664 18.1095351026283
40.07413028 154.233900747716 17.5632514499859
40.10013028 159.59876644138 17.8661001027857
40.12613028 169.399901270147 18.4065152198969
40.15213028 170.666415074904 18.4751949962594
40.17813028 166.706104245231 18.2595785408772
40.20413028 166.267394375925 18.235536426216
40.23013028 167.059407959608 18.2789172523762
40.25613028 163.544673452723 18.0856115988773
40.28213028 156.762754229717 17.7066515315413
40.30813028 160.516896754057 17.9174159271953
40.33413028 174.491116899043 18.6810661847253
40.36013028 168.289780920228 18.3461048138414
40.38613028 166.870550960799 18.2685823730687
40.41213028 178.919893779289 18.9166537093266
40.43813028 160.733144383389 17.929480995466
40.46413028 149.873302579743 17.3131916514398
40.49013028 155.979056503359 17.6623360008442
40.51613028 157.647962924941 17.7565741586006
40.54213028 166.608435980032 18.2542288788123
40.56813028 174.331805567989 18.6725362802159
40.59413028 152.189732067558 17.4464742608676
40.62013028 169.976873717089 18.4378346731436
40.64613028 175.692284296251 18.7452545619552
40.67213028 161.958128043403 17.9976736298558
40.69813028 170.333108636847 18.4571454259236
40.72413028 168.047936200415 18.3329177274331
40.75013028 174.854332209525 18.7004990419788
40.77613028 171.047711503929 18.4958217716288
40.80213028 174.672014889069 18.6907471701411
40.82813028 178.280555272128 18.8828258092971
40.85413028 179.463983362705 18.9453943407206
40.88013028 168.444576311915 18.3545403817102
40.90613028 173.109679637453 18.606970717312
40.93213028 163.150521509814 18.0638047769463
40.95813028 152.56913605595 17.46820746705
40.98413028 177.333333333333 18.8325958557674
41.01013028 177.793672647329 18.8570237655537
41.03613028 176.312021129558 18.7782864569458
41.06213028 158.963015014241 17.8304803644905
41.08813028 165.999954889948 18.2208646825527
41.11413028 155.41800610579 17.6305420282979
41.14013028 164.830687706454 18.1565793973674
41.16613028 166.603165265379 18.2539401371528
41.19213028 172.846510855264 18.592821779131
41.21813028 184.818847240125 19.2259640715427
41.24413028 173.277782260324 18.6160029147142
41.27013028 172.617730455378 18.580512934544
41.29613028 172.29624944697 18.5632028188549
41.32213028 174.988461737901 18.7076701776518
41.34813028 147.311563909841 17.1645893577353
41.37413028 189.790072854912 19.4828166780326
41.40013028 164.270119099591 18.1256789720877
41.42613028 148.44385796617 17.2304299404379
41.45213028 179.9420920567 18.9706136989134
41.47813028 165.420952347898 18.1890600278243
41.50413028 184.359337884782 19.2020487388602
41.53013028 172.976489973272 18.5998112879283
41.55613028 175.238024262759 18.7210055425856
41.58213028 203.963437511934 20.197199682725
41.60813028 187.704262417063 19.3754619256968
41.63413028 180.436718528065 18.9966691042438
41.66013028 175.068960382888 18.7119726583216
41.68613028 171.617841214576 18.5266209123292
41.71213028 188.221539736846 19.4021411053959
41.73813028 173.297009724674 18.6170357320747
41.76413028 185.491425459448 19.2609151111492
41.79013028 173.333997888521 18.6190224173301
41.81613028 185.750602878651 19.2743665462007
41.84213028 192.560607360682 19.624505464377
41.86813028 183.754495341036 19.1705240064551
41.89413028 190.352692949742 19.511673067666
41.92013028 179.894910631577 18.9681264563255
41.94613028 192.554594583139 19.6241990706953
41.97213028 216.337173101462 20.0567175468283
41.99813028 253.243834683975 21.0798096892343
42.02413028 259.058294411521 20.9305020871188
42.05013028 258.387566121125 21.0825219419229
42.07613028 282.297848673908 22.1951648686688
42.10213028 320.809349633218 23.7886015748167
42.12813028 387.619739057115 25.3919548710679
42.15413028 538.121616102086 28.2118927283923
42.18013028 507.508381449722 27.9996480719634
42.20613028 342.396854885694 25.575272013327
42.23213028 200.382883707266 23.9266965508883
42.25813028 173.2712073067 22.6869204950129
42.28413028 173.274313608032 21.9119291529627
42.31013028 128.71915089531 22.5202730387681
42.33613028 214.634339815092 21.1351752846469
42.36213028 192.499931908055 19.6214134000614
42.38813028 189.992903347613 19.4932246356324
42.41413028 195.028157264402 19.7498434051717
42.44013028 194.587135634855 19.7275003806795
42.46613028 187.929587035182 19.387087818194
42.49213028 193.046238382898 19.6492360351693
42.51813028 189.763186298271 20.672327165519
42.54413028 202.170506927538 20.1082324895819
42.57013028 191.663489371888 19.5787379252028
42.59613028 181.569836186926 19.0562239799455
42.62213028 185.214158241244 19.2465143982615
42.64813028 174.479270076541 18.6804320119499
42.67413028 172.90241242064 18.5958281569087
42.70013028 174.501791950991 18.6816376129605
42.72613028 173.938924296241 18.6514838174468
42.75213028 177.270664215079 18.8292678676086
42.77813028 173.333333333333 18.6189867250253
42.80413028 182.442462352882 19.1019612790353
42.83013028 182.757375933947 19.1184401002774
42.85613028 175.4755334834 18.7336880236327
42.88213028 182.943406984158 19.1281680766433
42.90813028 190.689799305702 19.5289425881537
42.93413028 182.89443434333 19.1256076684288
42.96013028 170.380487863183 18.4597122330324
42.98613028 162.342852505162 18.0190372942154
43.01213028 152.903328567593 17.4873284733599
43.03813028 157.873661752617 17.7692803316632
43.06413028 158.035973116292 17.7784123653543
43.09013028 169.142272155392 18.3925132679246
43.11613028 174.977451230269 18.7070816126016
43.14213028 170.341996504938 18.457626960416
43.16813028 171.006153610156 18.4935747550416
43.19413028 173.449759984565 18.6252387895868
43.22013028 185.130248924537 19.2421541894112
43.24613028 172.846444352357 18.5928182023251
43.27213028 155.189660062192 17.6175855361733
43.29813028 161.329769970455 17.9627264061142
43.32413028 163.297596772122 18.0719449297591
43.35013028 166.733019441253 18.261052512999
43.37613028 188.531287860036 19.4180991788607
43.40213028 175.081938514569 18.7126662191452
43.42813028 168.833236021774 18.3757033074532
43.45413028 169.493287826719 18.4115880807018
43.48013028 171.686735948314 18.5303392277807
43.50613028 174.105388394565 18.6604066619442
43.53213028 160.985347767992 17.9435418893814
43.55813028 158.40452796872 17.7991307635356
43.58413028 173.967734257237 18.6530284006237
43.61013028 177.267993281966 18.8291260169964
43.63613028 178.181592618536 18.8775842002379
43.66213028 168.048906137923 18.3329706342384
43.68813028 162.53838218809 18.0298853123413
43.71413028 172.897956627999 18.5955885428775
43.74013028 192.312509276401 19.6118591304548
43.76613028 176.666666666667 18.7971629064956
43.79213028 177.036473121728 18.8168261469211
43.81813028 179.326535707088 18.9381380133892
43.84413028 172.118701981932 18.5536358691191
43.87013028 161.623501175473 17.9790712316
43.89613028 177.957420702489 18.8657054308865
43.92213028 151.169785403705 17.3879145042587
43.94813028 149.283564839016 17.279095163753
43.97413028 160.666666666623 17.9257728796626
44.00013028 160.919175433592 17.9398537025023
44.02613028 168.926362306074 18.3807705119276
44.05213028 180.557289233443 19.003014983599
44.07813028 171.317761776286 18.5104166228795
44.10413028 162.737088311992 18.040902877184
44.13013028 168.558379464413 18.3607396073477
44.15613028 170.610726347419 18.4721805073153
44.18213028 171.949476730393 18.5445127587862
44.20813028 174.539160680568 18.683637797847
44.23413028 174.038491358246 18.6568213454621
44.26013028 172.1353186599 18.554531449751
44.28613028 172 18.5472369909914
44.31213028 176.258315062805 18.7754262301981
44.33813028 180.276961835887 18.988257520683
44.36413028 172.3352526692 18.5653038040965
44.39013028 159.563610571441 17.8641322527259
44.41613028 162.654970210988 18.0363505294717
44.44213028 184.042564260823 19.1855447804238
44.46813028 177.097785380569 18.820084238949
44.49413028 196.690347599329 19.8338270436811
44.52013028 182.338076293521 19.0964958195749
44.54613028 177.020275763362 18.8159653360311
44.57213028 198.8961330146 19.9447302821873
44.59813028 197.573193068086 19.8782893161401
44.62413028 190.181523791344 19.5028984405572
44.65013028 198.06874204258 19.9032028599711
44.67613028 177.974869663496 18.8666303119289
44.70213028 177.951734700031 18.8654040349011
44.72813028 179.497507064279 18.9471637489245
44.75413028 182.308601777332 19.0949523056399
44.78013028 163.76280484219 18.097668625665
44.80613028 174.042007286741 18.6570097972178
44.83213028 189.235269465727 19.4543192872805
44.85813028 187.03364314128 19.3408191729968
44.88413028 188.369096789823 19.4097448097508
44.91013028 176.770521793471 18.8026871373998
44.93613028 164.372630079332 18.1313336563713
44.96213028 171.078435298422 18.4974828178551
44.98813028 174.690967044469 18.6917611286079
45.01413028 165.835140321005 18.2118170604146
45.04013028 173.603656590313 18.6334997566379
45.06613028 183.582164800046 19.1615325483139
45.09213028 190.251951792845 19.5065092619282
45.11813028 184.461393115427 19.2073628130166
45.14413028 187.393079926712 19.3593946148485
45.17013028 198.793897343812 19.9396036742866
45.19613028 221.837937903756 21.0636149748212
45.22213028 242.782590134372 22.0355435664461
45.24813028 306.428528836198 22.454547365684
45.27413028 348.132565605875 23.445265033156
45.30013028 367.992104895866 24.1822319781167
45.32613028 367.349348912506 24.7559056485747
45.35213028 352.27316269865 25.1751713961959
45.37813028 330.197163310612 25.5686796682397
45.40413028 326.55583005028 26.1189249040692
45.43013028 332.763139542139 26.4463005051943
45.45613028 308.306290874006 25.8495363043739
45.48213028 298.873818899888 25.3146975492754
45.50813028 343.964387215422 25.9167171758474
45.53413028 368.881345717736 26.4018430090475
45.56013028 381.334153326028 26.5151605365565
45.58613028 391.352734369187 26.3609796064421
45.61213028 371.168599259624 26.2197057354084
45.63813028 380.12548921631 27.0763029989232
45.66413028 346.832674707166 26.8256879149279
45.69013028 326.257817435766 26.6543733634862
45.71613028 370.77187028953 27.4412486802801
45.74213028 379.171790516827 27.4364587663821
45.76813028 381.311586198379 27.3385048020343
45.79413028 437.667747986804 27.8487742758559
45.82013028 469.537323255424 28.493300477297
45.84613028 419.860389998896 28.155552686188
45.87213028 486.379302517736 29.4150726859659
45.89813028 544.594205633777 30.75470413511
45.92413028 538.844686586089 31.4173180142265
45.95013028 542.573264203523 31.5033154881863
45.97613028 533.368173320446 31.2453906477969
46.00213028 527.845312785236 32.1539100910205
46.02813028 508.398068859775 32.393373927013
46.05413028 534.822926303814 32.763015072412
46.08013028 587.170595380347 33.539539338062
46.10613028 628.040735182978 34.0280666155164
46.13213028 663.062620633943 34.3890055842579
46.15813028 695.381746717673 34.8050120292279
46.18413028 764.94395145976 36.2777174911187
46.21013028 794.600144398659 37.3347450678733
46.23613028 857.245412441994 38.6677570919047
46.26213028 919.106452948249 39.8870042223354
46.28813028 927.31654630334 40.5412444027463
46.31413028 970.693486800301 41.7502232114521
46.34013028 1055.30215037103 43.2186889352216
46.36613028 1113.72789928616 44.5904208148709
46.39213028 1150.65980918613 45.4936739166928
46.41813028 1337.99012455839 47.710008249804
46.44413028 1407.70806477851 49.0097170281613
46.47013028 1522.92601841008 50.9233343040265
46.49613028 1702.58731027565 53.1445845489857
46.52213028 1913.50150768334 55.8353487387132
46.54813028 2034.47154160911 58.2190768561775
46.57413028 2235.18329196903 60.6053637753822
46.60013028 2569.50711115201 64.3494125467479
46.62613028 2817.44492182716 67.6498088353034
46.65213028 3403.16960872884 73.1159276773146
46.67813028 4273.93110631091 79.747917996518
46.70413028 5069.12635088006 85.9780124689148
46.73013028 5683.38428897394 91.1847882747677
46.75613028 6751.03000266505 98.6015692507031
46.78213028 8897.10626009319 111.931490724133
46.80813028 12392.3901424642 129.881090455693
46.83413028 20115.3643346424 159.166889136723
46.86013028 37774.6010111835 209.10306610717
46.88613028 79000.0783979124 293.757488534636
46.91213028 119934.791744594 360.154260276823
46.93813028 92064.3599813702 326.1870683052
46.96413028 42836.6855287574 259.54383382315
46.99013028 17372.4199234937 255.635911263773
47.01613028 10588.3463775194 315.397574197158
47.04213028 7365.68293670006 346.609034465928
47.06813028 3887.36741887716 289.481714297541
47.09413028 3599.22360069281 200.597452129318
47.12013028 3228.7602335536 137.66897787954
47.14613028 1720.85288658648 107.372044002604
47.17213028 1267.98193126477 88.39461050808
47.19813028 1465.64920925862 72.6377305515542
47.22413028 937.805698239916 66.6599604380087
47.25013028 827.842922629119 60.9456240743342
47.27613028 1021.63979444193 51.3695018959287
47.30213028 820.322230326899 46.1192963488641
47.32813028 584.633563000637 43.9792763022039
47.35413028 660.003744536274 39.6493869638362
47.38013028 532.436718965586 37.3860085175184
47.40613028 392.671520063281 37.0195389069892
47.43213028 445.96286941438 34.881833624057
47.45813028 556.859226799765 33.979435450678
47.48413028 466.600941427993 33.1648151071095
47.51013028 502.914998279724 31.734498708053
47.53613028 532.315430034075 30.5588375564814
47.56213028 450.102792169005 30.2533522678317
47.58813028 376.732572351388 30.2572952821217
47.61413028 387.439856319635 29.3114451493835
47.64013028 363.34181506905 29.4947973412234
47.66613028 366.974452729385 29.7232413467815
47.69213028 368.902182922976 28.3756812477926
47.71813028 382.100623437262 27.5591182873672
47.74413028 340.025712239814 26.8766769005092
47.77013028 331.432551847727 26.3492067245618
47.79613028 365.30220523021 27.046094531216
47.82213028 350.984691495905 26.8484787433178
47.84813028 320.219090861636 26.3585257637393
47.87413028 343.98497887758 26.1096833600317
47.90013028 323.506035883338 25.6692944001606
47.92613028 278.453162593483 25.3103636828273
47.95213028 285.424739860414 25.1205645360305
47.97813028 301.820628921564 24.5691118651678
48.00413028 288.506540142508 25.0741371383377
48.03013028 315.692166005911 25.1457319240083
48.05613028 326.517169468609 24.5975102017399
48.08213028 292.664653932572 24.1935798894075
48.10813028 291.393208900681 24.1409696947194
48.13413028 310.734605364691 24.5282294924065
48.16013028 295.26672028647 24.3008938225107
48.18613028 297.285936745989 24.3838445182866
48.21213028 296.164984621118 24.3378300027393
48.23813028 274.942819936711 23.4496405062726
48.26413028 279.915486274835 23.6607475061476
48.29013028 278.253113175309 23.5903841925183
48.31613028 260.207159635706 22.8125912441224
48.34213028 263.985303511699 22.9776109946922
48.36813028 273.790683619551 23.4004565604841
48.39413028 256.472928199437 22.6483080250793
48.42013028 264.458659711245 22.9982025259039
48.44613028 271.972671840542 23.3226358647792
48.47213028 262.382814660106 22.9077635163324
48.49813028 263.763254235154 22.9679452383165
48.52413028 259.050846866694 22.7618473269062
48.55013028 263.638700847296 22.96252167543
48.57613028 256.668879526303 22.6569582921584
48.60213028 256.086511422582 22.6312399758644
48.62813028 260.148587137212 22.8100235483093
48.65413028 253.547434605864 22.5187670446614
48.68013028 259.50889813764 22.7819620813327
48.70613028 255.015370577755 22.5838601916393
48.73213028 246.236158717401 22.1917173160349
48.75813028 245.161508300254 22.1432386204121
48.78413028 231.235170565122 21.505123601836
48.81013028 230.513694888384 21.4715483786514
48.83613028 217.796904586369 20.870884245109
48.86213028 257.379562181968 22.6883036907552
48.88813028 246.763614261785 22.2154727278888
48.91413028 265.145822805919 23.0280621332286
48.94013028 239.820725497837 21.9007180474905
48.96613028 259.725337212003 22.7914605592535
48.99213028 220.42161140061 20.9962668777385
49.01813028 223.954992680635 21.163883985726
49.04413028 230.870535924112 21.4881612021183
49.07013028 247.979301738946 22.2701280525706
49.09613028 235.275470500084 21.6921861738315
49.12213028 234.051691008322 21.6356969385468
49.14813028 227.112997764743 21.3125783407237
49.17413028 234.321807783586 21.6481781119606
49.20013028 250.823683598494 22.3974857338271
49.22613028 252.215226225594 22.4595292125901
49.25213028 206.708772854012 20.3326718782364
49.27813028 232.173382018036 21.5487067833797
49.30413028 241.990112121037 21.9995505463651
49.33013028 240.670008511146 21.9394625508988
49.35613028 230.132572543373 21.4537909257722
49.38213028 246.294150524556 22.1943303807326
49.40813028 218.925166818333 20.9248735632182
49.43413028 244.81852449679 22.1277438749092
49.46013028 233.993492719392 21.6330068515402
49.48613028 219.576588703122 20.955981900313
49.51213028 214.33582468001 20.7043872007848
49.53813028 210.32753889605 20.5098775664824
49.56413028 225.742011712374 21.2481534121144
49.59013028 257.874536821365 22.7101095030986
49.61613028 237.644042713519 21.8011028488707
49.64213028 218.269379360989 20.8935099665417
49.66813028 216.579002542053 20.8124483202747
49.69413028 222.390543469988 21.0898337342895
49.72013028 212.01787696111 20.5921284456518
49.74613028 223.419790965299 21.1385804142709
49.77213028 237.050861903377 21.7738770963454
49.79813028 244.246687434363 22.1018862287526
49.82413028 241.558139731246 21.9799062660079
49.85013028 252.386033886791 22.4671330563911
49.87613028 257.437667926472 22.6908645902474
49.90213028 240.33806125684 21.9243271849715
49.92813028 216.870592039001 20.8264539487163
49.95413028 238.164003678779 21.8249400310186
49.98013028 233.676437430254 21.6183457938046
50.00613028 224.403239936538 21.1850532185566
50.03213028 217.316327409125 20.8478453279529
50.05813028 203.818622543635 20.1900283577629
50.08413028 214.94777023231 20.7339224572829
50.11013028 213.401985155816 20.659234504493
50.13613028 215.059285341814 20.739300149321
50.16213028 220.053254349452 20.9787156112786
50.18813028 223.120154563861 21.1244007992587
50.21413028 204.195929934008 20.2087075259161
50.24013028 216.974205962059 20.831428465761
50.26613028 218.234954549144 20.891862269752
50.29213028 221.665654797197 21.055434205791
50.31813028 231.056012324574 21.4967910314342
50.34413028 209.319381232303 20.4606637835777
50.37013028 212.018057401308 20.5921372082311
50.39613028 219.668349447502 20.9603601804693
50.42213028 219.376867531664 20.9464492232772
50.44813028 214.102756215267 20.6931271786198
50.47413028 219.137037870274 20.9349964351692
50.50013028 221.456101861665 21.0454794130077
50.52613028 214.502394035118 20.7124307619901
50.55213028 214.083055640815 20.6921751220511
50.57813028 216.028298096965 20.7859711390623
50.60413028 206.440641063814 20.3194803606694
50.63013028 206.359993759511 20.3155110080702
50.65613028 219.27637796653 20.9416512226964
50.68213028 215.925185033098 20.7810098423103
50.70813028 219.356541155837 20.9454788035909
50.73413028 225.485262315028 21.2360665997745
50.76013028 215.35370481921 20.7534915047666
50.78613028 202.201865203856 20.1097919036402
50.81213028 208.519481498859 20.4215318474819
50.83813028 223.278653297233 21.1319025786716
50.86413028 218.476024808328 20.9033980399517
50.89013028 234.564955572263 21.6594069896783
50.91613028 227.643982566795 21.33747794688
50.94213028 217.096546490286 20.8373005204746
50.96813028 269.748043884689 22.1350298107626
50.99413028 326.721515434222 23.243280910631
51.02013028 341.781161856234 23.9583343869572
51.04613028 341.482820717203 24.1147338438229
51.07213028 356.124377444464 24.1656413186231
51.09813028 290.285629393122 23.4405852297484
51.12413028 273.62616462667 24.2230017002948
51.15013028 263.895447634873 24.5205550954709
51.17613028 249.420772718593 24.2884475649234
51.20213028 212.862117604876 23.7597886906243
51.22813028 235.20977995635 21.6891576579797
51.25413028 229.753869539716 21.4361316258189
51.28013028 216.889277565962 20.8273511309509
51.30613028 190.377337463735 19.512936091923
51.33213028 191.559389009547 19.573420192166
51.35813028 210.211561637787 20.5042220841361
51.38413028 210.978661754707 20.5415998283828
51.41013028 229.468905909326 21.4228338886024
51.43613028 206.113435299122 20.3033709171222
51.46213028 219.01310625189 20.9290757680262
51.48813028 188 19.3907194296653
51.51413028 188.437389439381 19.4132629632105
51.54013028 192.104921640584 19.6012714710339
51.56613028 197.885411998853 19.8939896450588
51.59213028 186.675874953756 19.3223122298423
51.61813028 195.581997072254 19.7778662687487
51.64413028 198.782521307135 19.9390331414106
51.67013028 209.791025431405 20.4837020790386
51.69613028 205.100006920711 20.2533951188788
51.72213028 179.026187316018 18.9222719204655
51.74813028 196.934824498385 19.8461494753207
51.77413028 192.17279497059 19.6047338656045
51.80013028 193.971572929064 19.6962723848481
51.82613028 181.430588635096 19.0489153830393
51.85213028 170.314207947675 18.4561213665101
51.87813028 197.316594037517 19.8653766154844
51.90413028 196.271813739027 19.8127137837817
51.93013028 170.757915547015 18.4801469446006
51.95613028 187.919262475599 19.3865552626349
51.98213028 198.511144248731 19.925418151132
52.00813028 205.169983204912 20.2568498639306
52.03413028 191.171563907055 19.553596288512
52.06013028 218.699151603493 20.9140695037333
52.08613028 189.73662070425 19.4800729312931
52.11213028 193.614849862463 19.6781528534801
52.13813028 202.024345487852 20.1009624390402
52.16413028 208.773091501649 20.4339468288262
52.19013028 215.977637172883 20.7835337309555
52.21613028 229.809747387901 21.438738180588
52.24213028 236.059716519951 21.7283094841707
52.26813028 270.976765776728 21.4896806084039
52.29413028 260.163923513561 21.6141748365059
52.32013028 280.364418024914 22.217012856852
52.34613028 298.801552324761 22.9980404000591
52.37213028 303.374947041519 23.5807006623453
52.39813028 283.109588114663 23.4409303225969
52.42413028 255.158914133052 22.7721249492296
52.45013028 261.200821940503 23.0883502731029
52.47613028 220.506530464074 22.6134164309665
52.50213028 223.309820128515 21.1333773982539
52.52813028 220.887436591544 21.0184412643537
52.55413028 217.241976871874 20.8442786813012
52.58013028 208.427929560579 20.4170482470204
52.60613028 202.512671160264 20.1252414226644
52.63213028 202.316483278372 20.1154907113086
52.65813028 207.031307663849 20.3485285789341
52.68413028 200.534797432357 20.0267220199591
52.71013028 196.389872558622 19.8186716284731
52.73613028 209.023234717778 20.446184715872
52.76213028 208.706158035785 20.4306709647914
52.78813028 196.962283956143 19.8475330434864
52.81413028 194.893021369026 19.7429998414135
52.84013028 214.423555307531 20.7086240637823
52.86613028 199.805691846332 19.990282231441
52.89213028 187.517519377284 19.3658214066579
52.91813028 198.88909883328 19.9443775953666
52.94413028 185.547895003693 19.2638467084688
52.97013028 185.09520466755 19.2403328800491
52.99613028 201.044971743576 20.0521805170199
53.02213028 207.05901871337 20.34989035417
53.04813028 206.561858963369 20.3254450855753
53.07413028 201.450532120866 20.0723955780503
53.10013028 205.077641769261 20.2522908219915
53.12613028 201.885244271008 20.094041120243
53.15213028 193.948111190471 19.6950811722354
53.17813028 185.222087176662 19.2469263611966
53.20413028 186.305152351741 19.3031164505497
53.23013028 190.605668470651 19.5246341051837
53.25613028 186.667696750905 19.3218889734366
53.28213028 201.331561186162 20.0664676107262
53.30813028 200.395139241377 20.019747213258
53.33413028 184.816763354455 19.2258556820993
53.36013028 187.080923467011 19.3432636060729
53.38613028 180.30486433044 18.9897269243368
53.41213028 180.368432234632 18.9930741184587
53.43813028 178.445791485013 18.8915743909825
53.46413028 179.67436625694 18.9564957867714
53.49013028 199.14705704754 19.9573072856806
53.51613028 191.999954889951 19.5959156402527
53.54213028 188.600548122821 19.4216656403523
53.56813028 200.523305134063 20.0261481635417
53.59413028 204.200805046253 20.208948762677
53.62013028 192.269820073453 19.6096823061187
53.64613028 201.469811051442 20.0733560249123
53.67213028 207.347608177641 20.3640667931355
53.69813028 203.818622543639 20.1900283577631
53.72413028 197.20626170352 19.8598218372432
53.75013028 203.171456325945 20.1579491181988
53.77613028 199.729164878993 19.986453656364
53.80213028 202.592810632435 20.1292230665982
53.82813028 213.797091999554 20.6783506111853
53.85413028 194.467627411412 19.7214414996172
53.88013028 180.177478637801 18.983017601941
53.90613028 198.362976431122 19.9179806421797
53.93213028 219.584979743861 20.9563823091611
53.95813028 222.194372949052 21.0805300193829
53.98413028 206.595322518212 20.3270914062102
54.01013028 207.665669833824 20.3796795771584
54.03613028 218.377139662532 20.8986669269852
54.06213028 207.049939400249 20.3494441889821
54.08813028 208.424381234387 20.4168744539602
54.11413028 203.66844199193 20.1825886343616
54.14013028 187.187042919675 19.3487489476542
54.16613028 196.473575393612 19.8228946117166
54.19213028 214.378733077023 20.7064595272598
54.21813028 215.521777368716 20.7615884444672
54.24413028 204.90476525908 20.243752876336
54.27013028 187.156987712219 19.3471955441722
54.29613028 219.460147015202 20.9504246742257
54.32213028 195.461133696913 19.7717542821527
54.34813028 233.800236042821 21.6240715889872
54.37413028 210.155780365815 20.5015014262768
54.40013028 221.126074797026 21.0297919531804
54.42613028 226.629168963124 21.2898646760905
54.45213028 202.827504909308 20.1408790726377
54.47813028 221.223734381714 21.0344353088793
54.50413028 217.69390142794 20.8659484053776
54.53013028 204.875228271831 20.2422937569748
54.55613028 220.733073231815 21.0110957939759
54.58213028 241.854730990072 21.9933958719463
54.60813028 230.200781329062 21.4569700251019
54.63413028 228.053308140006 21.35665274054
54.66013028 285.7396380135 22.1963032609751
54.68613028 246.046312712551 22.183160852888
54.71213028 286.39907643936 22.6663693412458
54.73813028 273.837879355337 22.8624772622588
54.76413028 278.566404179637 22.7471667646797
54.79013028 272.263413382202 22.8453269240951
54.81613028 267.679057713398 23.3710615866922
54.84213028 251.161474805511 22.884842496392
54.86813028 248.739493751571 23.0239214560867
54.89413028 295.574203558516 23.8765544174865
54.92013028 292.531631931724 23.8366179194175
54.94613028 345.287343756083 24.8037510575725
54.97213028 368.329320966314 25.0985104352459
54.99813028 348.658900750705 24.4595271052999
55.02413028 350.775318332822 24.7640480146209
55.05013028 384.578396294381 26.0439009761676
55.07613028 346.337499467354 25.5729766960604
55.10213028 373.248231118414 26.9141966085456
55.12813028 359.79948120668 26.8535132996883
55.15413028 376.957952654921 26.9283800254142
55.18013028 403.018612373891 27.6139427215843
55.20613028 421.438602475882 28.1741697166924
55.23213028 422.387841418042 27.8441573217505
55.25813028 443.68082190554 28.4948869384315
55.28413028 513.401512177691 29.611524063644
55.31013028 545.274471372531 30.46665021551
55.33613028 642.499813364276 32.3922394918869
55.36213028 765.4561898789 34.4356688337043
55.38813028 846.579207659384 35.6832049848122
55.41413028 835.16228881252 35.9966187602423
55.44013028 851.236447841235 37.0308564544971
55.46613028 958.695364537806 39.0790360298838
55.49213028 1070.06692698514 41.7332853343639
55.51813028 1303.57032101931 45.6824362103173
55.54413028 1850.96949418716 51.8849090304975
55.57013028 2948.11427865278 61.5186455168792
55.59613028 5781.57810042076 81.5840776787065
55.62213028 11144.7500955379 110.121924992558
55.64813028 12423.5350549201 116.382515873217
55.67413028 7816.01381539012 96.1348272620191
55.70013028 3456.03741982112 74.5057402795692
55.72613028 1593.26764080627 71.8929728440541
55.75213028 909.059073119439 88.6574248552405
55.77813028 801.252078784376 110.40713226548
55.80413028 742.505442326326 110.160424272232
55.83013028 505.142735137705 85.8615602765086
55.85613028 384.497818810268 58.6571123189863
55.88213028 368.858050816311 42.61916842105
55.90813028 349.653694423836 35.1283179847365
55.93413028 213.916579497 31.6372253876322
55.96013028 226.833763376072 28.3724678545441
55.98613028 230.221167650463 26.6549997643687
56.01213028 224.158378484793 24.585864887696
56.03813028 217.137722671476 24.1088997429029
56.06413028 233.347622675829 23.6010277172726
56.09013028 248.497938242478 22.2934043269519
56.11613028 244.886681816255 22.1308238353775
56.14213028 237.354803730687 21.7878316374387
56.16813028 226.160924430832 21.2678595270343
56.19413028 226.568189835627 21.2870002506519
56.22013028 235.022680068031 21.6805295169666
56.24613028 225.333333333333 21.2289111041209
56.27213028 215.814732405587 20.7756940873506
56.29813028 201.834284320782 20.0915048874285
56.32413028 212.398371180472 20.6105978166802
56.35013028 216.118869709773 20.7903280257803
56.37613028 211.283771320727 20.5564477145604
56.40213028 216.25022708005 20.7966452621595
56.42813028 219.277455485147 20.9417026760074
56.45413028 204.327287304287 20.2152065190681
56.48013028 200.358484208939 20.0179161857042
56.50613028 197.017652264624 19.8503225296026
56.53213028 188.816976192293 19.4328060862189
56.55813028 199.739358140272 19.9869636583585
56.58413028 195.583362612176 19.7779353124726
56.61013028 199.836009033579 19.9917987701747
56.63613028 208.326140958428 20.4120621671809
56.66213028 222.140843290651 21.0779905726637
56.68813028 206.820748361269 20.3381783039322
56.71413028 185.265208411566 19.2491666526926
56.74013028 188.226186974517 19.4023806258159
56.76613028 191.143469967474 19.5521594698629
56.79213028 203.76244334498 20.1872456439693
56.81813028 217.230381641128 20.8437223950583
56.84413028 190.613855354009 19.5250534111438
56.87013028 184.93419637274 19.2319627897279
56.89613028 209.938651311565 20.4909078037829
56.92213028 197.130509196809 19.8560071110387
56.94813028 186.402237601327 19.3081453071664
56.97413028 216.637056820335 20.8152375350528
57.00013028 209.746398677774 20.4815233162855
57.02613028 221.781849542015 21.0609519985216
57.05213028 187.603054506182 19.3702377118187
57.07813028 192.341463248048 19.6133354250646
57.10413028 185.77287951752 19.2755222765828
57.13013028 220.278290946268 20.9894397708118
57.15613028 201.731539110292 20.0863903731005
57.18213028 177.328206629328 18.832323628768
57.20813028 172.047792189762 18.5498135941988
57.23413028 173.962233343676 18.6527334910289
57.26013028 206.373145975159 20.3161583954821
57.28613028 188.748739657627 19.4292943596841
57.31213028 203.855829901551 20.1918711317971
57.33813028 194.624773317212 19.7294081673634
57.36413028 186.547958328561 19.3156909443365
57.39013028 166.339564451239 18.2394936580618
57.41613028 187.762069135424 19.3784451974571
57.44213028 173.768710038664 18.6423555399346
57.46813028 188.052688694865 19.3934364512773
57.49413028 192.939645820074 19.6438105173143
57.52013028 204.959619379206 20.246462376386
57.54613028 191.724481211777 19.5818528853516
57.57213028 189.901417912185 19.4885308790676
57.59813028 194.491757737045 19.7226650195679
57.62413028 195.88818818869 19.7933417182996
57.65013028 191.065840056805 19.5481886657974
57.67613028 190.541625131967 19.5213536995756
57.70213028 181.571492072481 19.0563108744836
57.72813028 182.503705784484 19.1051671431832
57.75413028 191.681822082199 19.579674260937
57.78013028 202.242650961327 20.1118199555051
57.80613028 181.273328792015 19.0406580134204
57.83213028 178.015487693127 18.8687830923527
57.85813028 203.108746129488 20.1548379368075
57.88413028 186.898021423396 19.3338057000372
57.91013028 180.892548258867 19.0206492138868
57.93613028 166.309275013025 18.2378329311914
57.96213028 153.904798510536 17.5445033278538
57.98813028 187.850829847142 19.3830250398199
58.01413028 194.887361408132 19.7427131574225
58.04013028 182.584359444963 19.1093882395519
58.06613028 178.666666666667 18.9032625050104
58.09213028 190.432924966286 19.5157846353297
58.11813028 195.808321701248 19.7893062890667
58.14413028 200.404024785192 20.0201910472998
58.17013028 197.510134703594 19.875116840089
58.19613028 191.953360512269 19.5935377363185
58.22213028 206.372475063842 20.3161253719228
58.24813028 204.387623269441 20.2181909808687
58.27413028 225.946094110725 21.123027750869
58.30013028 265.641558953681 21.7278960740852
58.32613028 339.697274811564 23.3108949000456
58.35213028 435.164032889009 25.1884914162623
58.37813028 423.798496980145 25.3331430271412
58.40413028 369.727841680373 23.9578814509338
58.43013028 287.502549641948 22.590912477361
58.45613028 226.160076397894 22.0611022933369
58.48213028 191.308358000502 22.8416310336787
58.50813028 172.782713280517 24.4069573876829
58.53413028 181.63915852718 24.6044854155748
58.56013028 183.271001115622 23.6278912385445
58.58613028 167.346090822412 21.5415999444644
58.61213028 174.791097436731 18.6971172877923
58.63813028 184.45833929225 19.2072038200385
58.66413028 189.269687921394 19.4560884003643
58.69013028 175.774279779418 18.7496282512171
58.71613028 175.193831865409 18.7186448155527
58.74213028 194.326652822461 19.7142919133537
58.76813028 194.071643174599 19.7013523989902
58.79413028 181.685325298344 19.0622834570439
58.82013028 177.498857567519 18.8413830472988
58.84613028 168.372150612999 18.3505940292405
58.87213028 167.291123596726 18.291589520691
58.89813028 183.027174614542 19.1325468568376
58.92413028 169.574451026899 18.4159958203133
58.95013028 173.347509277094 18.6197480797724
58.97613028 170.945589770428 18.4902996065736
59.00213028 169.279468219247 18.3999710988494
59.02813028 174.224408471169 18.6667837867786
59.05413028 186.296378420887 19.3026619107773
59.08013028 188.14085197116 19.3979819554076
59.10613028 161.687600629048 17.9826361042562
59.13213028 148.02796031695 17.2062756177477
59.15813028 162.750212778659 18.0416303464326
59.18413028 147.879450687481 17.1976423202415
59.21013028 162.54779060072 18.0304071280002
59.23613028 152.583398187961 17.4690239102224
59.26213028 152.887440623383 17.4864199093687
59.28813028 187.265866610579 19.3528223580221
59.31413028 161.006224761719 17.9447053339819
59.34013028 135.279351957631 16.4486687581476
59.36613028 161.24469059071 17.9579893412771
59.39213028 184.420177033459 19.2052168450897
59.41813028 183.418496577007 19.1529891441
59.44413028 165.309368411213 18.1829243198784
59.47013028 170.014930719047 18.4398986287369
59.49613028 174.352327420694 18.6736352872543
59.52213028 170.128781305924 18.4460717393121
59.54813028 155.973768427687 17.6620365998764
59.57413028 168.35244135798 18.3495199587335
59.60013028 171.687247812347 18.5303668507856
59.62613028 168.182042011552 18.3402312968813
59.65213028 170.705562307833 18.4773137824649
59.67813028 170.881402421091 18.4868278739805
59.70413028 162.230993259522 18.0128283875422
59.73013028 168.30481689606 18.346924368736
59.75613028 178.405506586687 18.8894418438813
59.78213028 164.812199980703 18.1555611304472
59.80813028 181.313495104346 19.0427673989022
59.83413028 167.488909541827 18.3023992712336
59.86013028 181.0388450287 19.028339130292
59.88613028 174.22701925755 18.6669236489332
59.91213028 172.721172618754 18.5860793401273
59.93813028 196.080223336035 19.8030413490471
59.96413028 198.585701267695 19.9291596043433
59.99013028 194.949252033908 19.7458477677667
60.01613028 169.535542673377 18.41388295137
60.04213028 174.609405917545 18.6873971391173
60.06813028 174.733608813037 18.6940423029925
60.09413028 175.259776325242 18.7221674132693
60.12013028 156.565499833987 17.6955078951686
60.14613028 166.177478637757 18.2306049618633
60.17213028 173.159385660711 18.609641891273
60.19813028 159.26709449603 17.8475261308692
60.22413028 157.226702016637 17.7328340665917
60.25013028 159.54701528633 17.8632032562097
60.27613028 168.74889002445 18.3711126513584
60.30213028 165.264759018595 18.1804707870063
60.32813028 158.130665066054 17.783737799802
60.35413028 161.936277080317 17.996459489595
60.38013028 138.87706289007 16.6659570916326
60.40613028 158.20029721407 17.7876528645052
60.43213028 167.521349368605 18.3041716211691
60.45813028 180.01203826754 18.9743004228109
60.48413028 183.99999999995 19.1833260932483
60.51013028 164.509125158458 18.1388602265114
60.53613028 158.294647351968 17.7929563227682
60.56213028 167.673467470999 18.312480305573
60.58813028 168.528769618081 18.3591268647548
60.61413028 159.960334546864 17.8863263163157
60.64013028 157.575061791533 17.7524680983537
60.66613028 164.713740510684 18.1501372177008
60.69213028 166.236128644036 18.2338217959941
60.71813028 167.070745242414 18.2795374800575
60.74413028 160.300713920114 17.9053463479551
60.77013028 147.998658177267 17.2045725420463
60.79613028 151.208992783368 17.390169221912
60.82213028 158.447361182316 17.8015370787084
60.84813028 161.203836005951 17.9557141882996
60.87413028 155.290715281957 17.6233206452109
60.90013028 152.60691139278 17.4703698525692
60.92613028 166.587324755552 18.2530723307367
60.95213028 167.379157899046 18.2964017172255
60.97813028 162.139484106905 18.0077474497453
61.00413028 154.655185373209 17.5872218029573
61.03013028 156.207699248768 17.6752764758443
61.05613028 166.786878199171 18.2640016534806
61.08213028 164.207159635704 18.1222051437293
61.10813028 167.711584619691 18.3145616720516
61.13413028 158.917210133875 17.82791127047
61.16013028 151.956044157736 17.433074551423
61.18613028 156.081767608634 17.6681503054867
61.21213028 147.38265879082 17.168730808701
61.23813028 150.593391323703 17.3547337244743
61.26413028 152.378924522055 17.4573150582817
61.29013028 158.775577345907 17.8199650586586
61.31613028 173.128844630743 18.6080006787802
61.34213028 166.949970379653 18.2729291784132
61.36813028 148.737501275422 17.2474636555884
61.39413028 147.969929755862 17.2029026478593
61.42013028 168.959870970967 18.3825934498355
61.44613028 178.498273698161 18.8943522618883
61.47213028 172.785239674629 18.5895260657516
61.49813028 162.748776087164 18.0415507142354
61.52413028 163.957579749829 18.1084278583111
61.55013028 161.778688137682 17.9877006945125
61.57613028 163.530916828567 18.0848509437356
61.60213028 159.04990297071 17.8353527002249
61.62813028 145.1305005163 17.0370478966457
61.65413028 152.319166923834 17.4538916533726
61.68013028 171.804285228213 18.5366817541982
61.70613028 174.117701971057 18.6610665274553
61.73213028 168.080959042794 18.3347189257318
61.75813028 154.314782282767 17.5678560036657
61.78413028 150.843902393213 17.3691624664641
61.81013028 152.150851463076 17.4442455533666
61.83613028 160.134021947215 17.8960343063605
61.86213028 154.280411261477 17.5658994225446
61.88813028 149.776894597694 17.3076222860157
61.91413028 158.747776076245 17.8184048711575
61.94013028 165.728425140389 18.2059564505899
61.96613028 160.068742042577 17.8923862043372
61.99213028 166.005318149037 18.2211590272978
62.01813028 160.594468842324 17.9217448281312
62.04413028 151.564219011745 17.4105840804808
62.07013028 165.389708008867 18.1873421922428
62.09613028 172.010367345297 18.5477959523657
62.12213028 182.682530893677 19.1145248904427
62.14813028 159.449400811692 17.8577378641133
62.17413028 178.356064867589 18.8868242363606
62.20013028 188 19.3907194296653
62.22613028 188.608291969387 19.4220643583213
62.25213028 208.294510952153 19.5875557756237
62.27813028 231.84402582157 20.3419741892476
62.30413028 215.396376229932 19.8081263442644
62.33013028 237.890766688318 20.1304967025496
62.35613028 215.171008477955 20.1348042516901
62.38213028 220.875121548593 20.5269558586016
62.40813028 226.194041743375 20.7174737342045
62.43413028 188.766922001052 19.4302301582381
62.46013028 188.336194229556 20.3269844501401
62.48613028 220.719937489549 21.0664693532951
62.51213028 216.734450571206 21.1044541345587
62.53813028 213.163426950352 20.7291387506998
62.56413028 186.219963683368 19.2987027379235
62.59013028 189.039913866811 19.4442749346337
62.61613028 208.366014729002 19.6837508746297
62.64213028 194.441174320652 19.720100117426
62.66813028 201.675321928718 20.4999611963504
62.69413028 172.769257478489 18.5886663038793
62.72013028 190.558652449034 19.52222592068
62.74613028 178.706822590978 18.9053866710511
62.77213028 175.50977553072 18.7355157671584
62.79813028 190.200931695888 19.5038935444125
62.82413028 176.840623019795 18.8064150235921
62.85013028 176.79300491405 18.8038828391399
62.87613028 150.28601339997 17.3370132029696
62.90213028 170.844487116326 18.4848309224794
62.92813028 179.360448654901 18.9399286511276
62.95413028 157.650055491116 17.7566920056139
62.98013028 137.285253122264 16.5701691676497
63.00613028 152.533070395188 17.4661426992446
63.03213028 155.95081219695 17.6607368021241
63.05813028 160.895836312791 17.9385526903812
63.08413028 148.692784301694 17.2448707911479
63.11013028 148.924523655995 17.2583037205859
63.13613028 152.61001668218 17.4705475977246
63.16213028 160.042450323537 17.8909167078457
63.18813028 152.741903277505 17.4780950493757
63.21413028 148.200673747951 17.2163105076524
63.24013028 176.940817590632 18.8117419496777
63.26613028 173.247761774892 18.6143902277185
63.29213028 163.994888332677 18.1104880294639
63.31813028 158.05893167136 17.7797036910833
63.34413028 163.558786925377 18.0863919522594
63.37013028 163.736962516112 18.0962406325796
63.39613028 152.93955559998 17.4893999668359
63.42213028 160.392220748402 17.9104562057141
63.44813028 168.406459163226 18.3524635492473
63.47413028 156.671337621528 17.701487938675
63.50013028 161.250008739744 17.9582854827371
63.52613028 166.520468797437 18.2494092396131
63.55213028 173.499992908539 18.6279356295076
63.57813028 168.718351318813 18.3694502540938
63.60413028 163.001033262328 18.0555273122846
63.63013028 166.360155131178 18.2406225294631
63.65613028 167.020206936124 18.2767725234038
63.68213028 160.394825178609 17.9106016190752
63.70813028 158.764347644169 17.8193348722207
63.73413028 161.33115922757 17.9628037470529
63.76013028 159.987494978479 17.8878447543844
63.78613028 172.523907218185 18.5754626977734
63.81213028 183.136375639417 19.1382536109969
63.83813028 166.841035983228 18.2669666876156
63.86413028 162.390900318529 18.0217035997449
63.89013028 176.078653638731 18.7658548240538
63.91613028 169.298108636153 18.4009841386896
63.94213028 168.633529886997 18.3648321466327
63.96813028 173.45759001938 18.6256591840063
63.99413028 168.140376536623 18.3379593486638
64.02013028 174.986384208408 18.7075591250386
64.04613028 180.666666666667 19.0087699058443
64.07213028 192.722695169806 19.4488687386917
64.09813028 210.842494801251 19.6839939895549
64.12413028 195.795329469326 19.2310170488758
64.15013028 206.253899140415 19.3880959372504
64.17613028 216.386305420064 19.4664108861945
64.20213028 212.903184156164 19.8360105515982
64.22813028 208.211925312932 19.8795059505827
64.25413028 188.042023487916 19.5613414380016
64.28013028 198.021403644391 20.151155096093
64.30613028 196.040842249904 19.8130355998761
64.33213028 173.758897343117 18.6418291668558
64.35813028 175.531869405063 18.7366949809759
64.38413028 183.125229801643 19.1376712168249
64.41013028 180.369223439454 18.9931157759571
64.43613028 211.488252025646 20.0009820964213
64.46213028 180.88789466502 19.0204045522181
64.48813028 175.786715973748 18.7502915163337
64.51413028 162.937166331992 18.0519897148205
64.54013028 160.398220813638 17.9107912060656
64.56613028 147.65171540852 17.1843949796622
64.59213028 159.846483959896 17.8799599529695
64.61813028 170.624893610672 18.4729474427159
64.64413028 178.010103041187 18.8684977166274
64.67013028 164.384500619027 18.1319883421001
64.69613028 170.933504068511 18.489645971111
64.72213028 171.349371644365 18.5121242241059
64.74813028 163.211457234764 18.0671778224915
64.77413028 171.284642357635 18.5086273049967
64.80013028 158.396038027377 17.7986537708545
64.82613028 150.115534221469 17.3271771631428
64.85213028 160.095108945034 17.8938597817818
64.87813028 176.720746942979 18.8000397309675
64.90413028 157.78383855892 17.7642246416172
64.93013028 154.941185444015 17.6034761024074
64.95613028 175.036969949077 18.7102629564139
64.98213028 166.423931841419 18.2441186052612
65.00813028 156.666666666667 17.7012240631357
65.03413028 156.705050443803 17.703392355354
65.06013028 165.285723908095 18.1816239048164
65.08613028 170.584449665059 18.4707579522367
65.11213028 160.270271790749 17.9036460974154
65.13813028 160.643159818024 17.9244614880349
65.16413028 152.391582234733 17.4580401096305
65.19013028 169.008112553699 18.3852175703035
65.21613028 137.587607891245 16.5884060651556
65.24213028 145.200539271566 17.0411583685832
65.26813028 156.981539169531 17.7190033111082
65.29413028 159.810411943092 17.8779423840157
65.32013028 165.371702073788 18.1863521396562
65.34613028 167.770722772675 18.3177904111099
65.37213028 173.836260625338 18.6459786884646
65.39813028 168.896554658536 18.3791487647571
65.42413028 169.140792678184 18.3924328286491
65.45013028 159.74904821803 17.8745096837944
65.47613028 158.55716661565 17.8077043223235
65.50213028 165.273287713813 18.1809398939556
65.52813028 155.243991930305 17.6206692228363
65.55413028 159.114531032505 17.8389759253442
65.58013028 172.342224379506 18.5656793239303
65.60613028 159.610564121994 17.8667604294676
65.63213028 152.745946106716 17.4783263561884
65.65813028 150.467412249193 17.347473144478
65.68413028 150.504247721881 17.3495964057889
65.71013028 155.642995268271 17.6432987430509
65.73613028 167.153693302119 18.2840746718077
65.76213028 154.196960018249 17.561148027293
65.78813028 152.77788274997 17.480153474725
65.81413028 172.100082957888 18.5526323177003
65.84013028 164.932018235125 18.1621594660506
65.86613028 170.115258912516 18.4453386476105
65.89213028 162.244797318051 18.0135947172157
65.91813028 159.557711731136 17.8638020438616
65.94413028 164.40002706603 18.1328446232812
65.97013028 161.253673327553 17.9584895426955
65.99613028 158.666666666667 17.8138522878499
66.02213028 160.339684744698 17.9075227066559
66.04813028 155.982017782024 17.6625036606945
66.07413028 155.906865035188 17.6582482163542
66.10013028 161.187279474755 17.9547920887297
66.12613028 171.952824931046 18.5446933073074
66.15213028 173.377837469174 18.6213768271401
66.17813028 160.914431619656 17.9395892717562
66.20413028 161.067059261744 17.9480951224214
66.23013028 168.858680421101 18.3770879315033
66.25613028 168.514342082559 18.3583409970814
66.28213028 165.258243057479 18.180112379052
66.30813028 150.180358376959 17.3309179431996
66.33413028 147.838494877835 17.1952606771654
66.36013028 154.345125511529 17.5695831203548
66.38613028 159.78476741823 17.8765079038513
66.41213028 163.909796240572 18.1057889218102
66.43813028 158 17.7763888346312
66.46413028 161.669622442995 17.9816363239275
66.49013028 167.495935042644 18.3027831240303
66.51613028 168.748189039718 18.3710744944175
66.54213028 168 18.3303027798234
66.56813028 164.36854849625 18.131108542847
66.59413028 158.242423086755 17.7900209716996
66.62013028 154.803877767203 17.5956743415649
66.64613028 164.45589623371 18.1359254648727
66.67213028 176.160627729084 18.7702225734851
66.69813028 164.564673907135 18.1419223847494
66.72413028 164.030480883235 18.1124532233066
66.75013028 158.867256550612 17.8251090628143
66.77613028 160.490658825566 17.9159514860677
66.80213028 162.256011983072 18.0142172732024
66.82813028 149.817379621515 17.3099612721412
66.85413028 146.789034943909 17.1341200500002
66.88013028 164.73415943094 18.1512621837127
66.90613028 157.673635198841 17.7580198895508
66.93213028 163.118713840528 18.0620438400823
66.95813028 149.677132058816 17.3018572447478
66.98413028 145.11369006897 17.0360611685313
67.01013028 166.000892429763 18.220916136669
67.03613028 165.916426138979 18.2162798693355
67.06213028 160.716273789319 17.9285400292003
67.08813028 165.039242955445 18.1680622497527
67.11413028 164.842581963339 18.1572344790356
67.14013028 165.591321620963 18.1984241966695
67.16613028 161.596826566361 17.9775875225994
67.19213028 182.077518297709 19.0828466585942
67.21813028 167.789216854689 18.3188000073525
67.24413028 169.463219906911 18.409954910695
67.27013028 168.9837132753 18.383890408469
67.29613028 180.493979277185 18.9996831172093
67.32213028 172.821027702065 18.5914511376635
67.34813028 179.997079799456 18.9735120523036
67.37413028 160.592384956654 17.9216285508128
67.40013028 159.187997820499 17.8430937799754
67.42613028 152.732623838847 17.4775641231178
67.45213028 158.639071878686 17.812303157014
67.47813028 144.2897785959 16.9876295342169
67.50413028 157.944096110289 17.7732437169071
67.53013028 177.852221428624 18.8601283892037
67.55613028 186.68984674014 19.3230353071219
67.58213028 171.551380858873 18.5230332752966
67.60813028 158.412942726644 17.7996035195531
67.63413028 176.495871717828 18.7880745004818
67.66013028 162.622637965326 18.0345578246502
67.68613028 143.481135621895 16.9399607804679
67.71213028 176.736047222911 18.8008535563102
67.73813028 185.113417084345 19.2412794316981
67.76413028 192.392313292832 19.6159278798038
67.79013028 181.234676062104 19.0386278949983
67.81613028 181.295162394088 19.0418046620633
67.84213028 183.820856796134 19.1739853340996
67.86813028 166.157285884599 18.2294972988615
67.89413028 181.708898649896 19.0635200658166
67.92013028 188.751659858167 19.4294446579498
67.94613028 194.692126102677 19.732821699021
67.97213028 170.014651378243 18.4398834800138
67.99813028 180.057075660269 18.9766738740101
68.02413028 188.906922003834 19.4374340901177
68.05013028 184.879342252615 19.2291103409708
68.07613028 173.877752016203 18.6482037749593
68.10213028 189.227699703184 19.4539301789219
68.12813028 186.077258025443 19.2913067481414
68.15413028 196.601722217712 19.8293581448171
68.18013028 180.041377453571 18.9758466189823
68.20613028 201.7969734135 20.089647752686
68.23213028 213.370588125623 20.657714690915
68.25813028 186.284297367684 19.3020360256468
68.28413028 189.207420761728 19.4528877425295
68.31013028 210.265134081903 20.506834669539
68.33613028 220.465786436999 20.9983707195106
68.36213028 263.385299834632 21.3765872682557
68.38813028 275.796067945359 21.7794921018686
68.41413028 291.609753131166 22.5731983499167
68.44013028 373.87568789802 24.053912843997
68.46613028 543.618184656415 27.1165901841402
68.49213028 672.175270658203 29.6976584547709
68.51813028 581.046596473071 28.4386851230291
68.54413028 372.589835574069 24.9295876282521
68.57013028 257.936986570796 22.961997051434
68.59613028 217.761696128742 22.3891650763133
68.62213028 178.746676870952 22.6795323548263
68.64813028 179.708513257546 25.3888100658565
68.67413028 202.198912554847 28.5188691929121
68.70013028 217.070300595712 28.9460047074394
68.72613028 211.467677093618 26.0622191172769
68.75213028 222.23140451541 21.0822866176992
68.77813028 204.946533666421 20.2458160451201
68.80413028 208.343035269682 20.4128898135312
68.83013028 212.892386887201 20.6345529094866
68.85613028 201.441035812458 20.0719224695821
68.88213028 188.858291174865 19.4349320129948
68.90813028 194.840048684596 19.7403165468336
68.93413028 202.472736754401 20.1232570303319
68.96013028 196.205970504131 19.8093902230296
68.98613028 191.954885099524 19.5936155468828
69.01213028 198 19.8997487421324
69.03813028 189.424874883656 19.464063033378
69.06413028 173.78035270379 18.6429800570504
69.09013028 180.667571808777 19.0088175228643
69.11613028 185.423227678605 19.2573740514435
69.14213028 184.641280089743 19.2167260525691
69.16813028 194.415502046804 19.7187982416173
69.19413028 189.169402513642 19.4509332687993
69.22013028 197.875919722301 19.8935124964045
69.24613028 203.166198323642 20.1576882763695
69.27213028 205.870984463327 20.2914259953965
69.29813028 199.081884724012 19.95404143145
69.32413028 192.545822976671 19.6237520865237
69.35013028 185.335064402306 19.252795350406
69.37613028 183.922004560281 19.179259868946
69.40213028 174.724772411172 18.6935696115628
69.42813028 182.689754195706 19.1149027826827
69.45413028 182.541113267938 19.1071250201561
69.48013028 190.666879504558 19.5277689204147
69.50613028 193.291661502273 19.6617222797126
69.53213028 184.565673918008 19.2127912557238
69.55813028 180.81366674556 19.01650161021
69.58413028 176.714740521558 18.7997202384268
69.61013028 179.010807203906 18.9214590982781
69.63613028 178.510901337475 18.8950205788443
69.66213028 177.176810904521 18.8242827701095
69.68813028 187.790010383848 19.3798870163811
69.71413028 185.693062788739 19.271380998192
69.74013028 172.249678786478 18.5606938871626
69.76613028 171.59333435506 18.5252980734486
69.79213028 176.087930753058 18.7663491789457
69.81813028 178.975879208635 18.9196130620388
69.84413028 179.58406359691 18.9517315091212
69.87013028 188.654155288971 19.4244256177098
69.89613028 182.56811232788 19.1085380041426
69.92213028 207.554363530482 20.374217213453
69.94813028 198.600817075596 19.9299180668459
69.97413028 182.839035961477 19.1227108936718
70.00013028 170.935974876085 18.489779602585
70.02613028 185.258417141493 19.2488138409354
70.05213028 197.262842860771 19.8626706593434
70.07813028 201.584242329587 20.079055870712
70.10413028 180.591126997843 19.0047955525885
70.13013028 171.541673420108 18.5225091939569
70.15613028 185.200700643228 19.2458151629505
70.18213028 182.507406801836 19.1053608603364
70.20813028 178.846022708422 18.9127482248573
70.23413028 184.613412317214 19.2152758146853
70.26013028 181.946410194864 19.0759749525346
70.28613028 176.668427809005 18.797256598185
70.31213028 190.529515712861 19.5207333731528
70.33813028 182.170896173774 19.087739319981
70.36413028 185.234529727022 19.247572819814
70.39013028 181.491586831115 19.0521173012931
70.41613028 203.512001102698 20.1748358656371
70.44213028 198.396053064056 19.919641214844
70.46813028 189.934195518981 19.4902126986332
70.49413028 186.264175149239 19.3009935054774
70.52013028 176.89174837353 18.8091333332256
70.54613028 178.402407653507 18.8892777868031
70.57213028 191.140394751437 19.5520021865504
70.59813028 159.77382403033 17.8758957275058
70.62413028 201.213162262223 20.0605664058732
70.65013028 200.536147935595 20.0267894549074
70.67613028 211.251413033535 20.5548735356623
70.70213028 177.995830521159 18.8677412808825
70.72813028 196.276737993165 19.8129623223366
70.75413028 185.450525764688 19.2587915386552
70.78013028 186.328545263099 19.3043282847707
70.80613028 193.212319591161 19.657686516534
70.83213028 193.08315136333 19.6511145415893
70.85813028 206.739703130222 20.3341930319461
70.88413028 202.94753600162 20.1468377668368
70.91013028 198.634691269539 19.9316176598659
70.93613028 178.947598472674 18.9181182189284
70.96213028 176.624779673387 18.7949344065568
70.98813028 177.023701471762 18.8161473990699
71.01413028 166.072909813908 18.2248681648953
71.04013028 171.023471272863 18.4945111464382
71.06613028 183.096150887771 19.1361516971292
71.09213028 178.817939773683 18.9112632985574
71.11813028 178.973932977442 18.9195101933133
71.14413028 183.805887323214 19.1732046003381
71.17013028 188.868095189904 19.4354364597198
71.19613028 183.267750370714 19.1451168902524
71.22213028 179.333333333333 18.9384969484557
71.24813028 183.553339802416 19.160028173383
71.27413028 188.076928925935 19.3946863303295
71.30013028 192.603500721061 19.6266910466875
71.32613028 178.982580258605 18.9199672440839
71.35213028 161.942466266258 17.996803397618
71.37813028 180.279987293204 18.988416853082
71.40413028 182.521142033142 19.1060797670868
71.43013028 175.005572918888 18.7085848165428
71.45613028 178.809660345893 18.9108254894329
71.48213028 175.650397302976 18.7430198902405
71.50813028 181.252152772146 19.0395458334565
71.53413028 192.127230677148 19.6024095803117
71.56013028 193.6387997479 19.679369895802
71.58613028 191.994651777598 19.5956450150332
71.61213028 193.639081413029 19.6793842085076
71.63813028 189.544445578148 19.4702052160807
71.66413028 182.034340947924 19.0805838981895
71.69013028 188.45293727929 19.4140638342048
71.71613028 197.575466074455 19.8784036619873
71.74213028 184.443389504664 19.2064254615305
71.76813028 166.37696325409 18.2415439727063
71.79413028 171.944859566081 18.5442637797288
71.82013028 186.635368537079 19.320215761584
71.84613028 194.650705863381 19.7307225343311
71.87213028 194.246130460283 19.7102070237876
71.89813028 194.357004731733 19.7158314423578
71.92413028 200.667236353097 20.0333340387014
71.95013028 204.676565550473 20.2324771370425
71.97613028 185.034511853851 19.2371781638499
72.00213028 189.563502990331 19.4711839902113
72.02813028 179.716479417278 18.9587172254495
72.05413028 165.62459140644 18.2002522733307
72.08013028 180.559592313175 19.0031361787035
72.10613028 184.055536036326 19.1862208908543
72.13213028 180.695713182743 19.0102979031231
72.15813028 178.476246326726 18.8931864081592
72.18413028 191.65356041477 19.578230789056
72.21013028 203.441721760516 20.1713520499007
72.23613028 190.28177447707 19.5080380600956
72.26213028 195.645509478381 19.7810772951516
72.28813028 168.157406178066 18.3388879803583
72.31413028 172.285658258949 18.5626322626372
72.34013028 181.49478466494 19.0522851471911
72.36613028 173.163916636765 18.6098853643307
72.39213028 186.773747376336 19.327376820269
72.41813028 192.418002927745 19.6172374674797
72.44413028 188.390408139839 19.4108427503722
72.47013028 178.666343923337 18.9032454315833
72.49613028 196.263459127717 19.8122920999927
72.52213028 182.941843643028 19.1280863466803
72.54813028 181.761757396929 19.0662926336994
72.57413028 188.920594764069 19.4381375015236
72.60013028 190.74469450408 19.5317533521228
72.62613028 192.475940944408 19.6201906690229
72.65213028 200.509643378667 20.0254659560604
72.67813028 187.830331711664 19.3819674807107
72.70413028 198.710790236773 19.9354352968162
72.73013028 183.603054506181 19.1626227070399
72.75613028 187.141639997899 19.3464022494054
72.78213028 184.190342832194 19.1932458345218
72.80813028 188.853704083926 19.4346959885626
72.83413028 210.222808700497 20.5047706010332
72.86013028 194.702304327274 19.7333374940619
72.88613028 196.724574609967 19.8355526572852
72.91213028 203.985144464367 20.1982744047291
72.93813028 192.143376569288 19.6032332317548
72.96413028 171.133233920478 18.5004450714288
72.99013028 193.258171905917 19.6600189168737
73.01613028 174.834298503706 18.699427718714
73.04213028 170.206548871068 18.4502871994486
73.06813028 196.901960703337 19.8444934782089
73.09413028 201.142715192187 20.0570543795537
73.12013028 181.736620704247 19.0649742042441
73.14613028 189.692518527005 19.4778088360578
73.17213028 199.0550123137 19.9526946708308
73.19813028 175.112787251173 18.7143146949693
73.22413028 171.999999999907 18.5472369909864
73.25013028 218.925159845313 20.9248732299774
73.27613028 185.910433046753 19.2826571326025
73.30213028 208.204088451511 20.4060818606371
73.32813028 201.024809063749 20.0511749812199
73.35413028 180.422170699088 18.9959032793436
73.38013028 197.970364112149 19.8982594270026
73.40613028 182.700216409763 19.1154501076884
73.43213028 168.405659277892 18.3524199645656
73.45813028 170.737636605564 18.479049575428
73.48413028 175.118735233384 18.7146325228888
73.51013028 181.644917782272 19.0601635765422
73.53613028 184.853011779699 19.2277409895026
73.56213028 172.334773202917 18.565277978146
73.58813028 199.079774796831 19.9539356918294
73.61413028 186.637684945981 19.3203356568141
73.64013028 190.00250088094 19.493716981681
73.66613028 197.507577707765 19.8749881865507
73.69213028 193.064222925119 19.6501512933167
73.71813028 197.11024296771 19.8549864249619
73.74413028 196.824515881526 19.8405905094343
73.77013028 193.545230426804 19.674614630371
73.79613028 190.464612342109 19.5174082471064
73.82213028 193.671293365237 19.6810209778475
73.84813028 201.980535980569 20.0987828477532
73.87413028 213.324092648553 20.6554638122001
73.90013028 205.581457459182 20.2771525347709
73.92613028 207.776077351231 20.3850963868818
73.95213028 201.577627467877 20.0787264271356
73.97813028 196.09208116338 19.8036401281876
74.00413028 197.225016057715 19.8607661512699
74.03013028 199.713683542039 19.9856790498616
74.05613028 203.871311238502 20.1926378285999
74.08213028 204.965685947354 20.2467620101266
74.10813028 193.835690938912 19.6893723078676
74.13413028 196.3624495304 19.8172878835828
74.16013028 205.971061065034 20.2963573611145
74.18613028 218.29847501896 20.8949024893135
74.21213028 218.622035881192 20.9103819133555
74.23813028 209.946248823198 20.4912785751987
74.26413028 213.654676687266 20.6714622940549
74.29013028 210.852715077888 20.5354676147337
74.31613028 204.868424289413 20.2419576271374
74.34213028 210.441965525531 20.5154559064882
74.36813028 219.487131038474 20.9517126287315
74.39413028 223.765380906541 21.1549228741937
74.42013028 212.744157215344 20.6273680926745
74.44613028 201.085299427572 20.0541915532674
74.47213028 216.640299764207 20.8153933311003
74.49813028 219.830002612166 20.9680710897386
74.52413028 225.578573688184 21.2404601498265
74.55013028 225.17473337503 21.2214388473086
74.57613028 234.751152642785 21.6680018757053
74.60213028 214.784818030694 20.7260617595671
74.62813028 220.954019565042 21.0216088615996
74.65413028 221.335165627123 21.0397322049081
74.68013028 218.936478059609 20.9254141206146
74.70613028 219.59545931894 20.9568823692333
74.73213028 206.053953009839 20.3004410301766
74.75813028 225.57948115463 21.2405028732669
74.78413028 215.223794528444 20.7472308768396
74.81013028 215.256787297463 20.7488210410839
74.83613028 200.205237121704 20.0102592247929
74.86213028 195.871356348553 19.7924913211325
74.88813028 200.894533243931 20.0446767618703
74.91413028 197.700544038692 19.8846948198202
74.94013028 209.012861016309 20.4456773434538
74.96613028 202.092476765797 20.1043516068436
74.99213028 215.211175569637 20.7466226441625
75.01813028 216.685771513226 20.8175777415734
75.04413028 210.43597243329 20.5151637786926
75.07013028 195.829493072462 19.7903760991277
75.09613028 203.526688910502 20.175563878638
75.12213028 213.01781999247 20.6406308039493
75.14813028 204.867942498745 20.2419338255388
75.17413028 210.179646387391 20.5026655041432
75.20013028 213.912791624534 20.683945060096
75.22613028 227.940546076586 21.3513721374804
75.25213028 199.395832399427 19.9697687717924
75.27813028 222.603302919855 21.0999195695081
75.30413028 222.34049331054 21.0874604118438
75.33013028 227.153082537484 21.3144590612797
75.35613028 253.756314713135 21.6368843766237
75.38213028 230.777379566446 21.4838255237025
75.40813028 233.696507565652 21.61927415829
75.43413028 269.632777416335 22.2362222935559
75.46013028 252.632574581735 21.4734141748383
75.48613028 283.885277315304 22.256040948617
75.51213028 250.558990481346 21.8953542925608
75.53813028 247.403861528587 21.8316559679977
75.56413028 294.163850284286 23.1584410768982
75.59013028 263.71856012491 22.5770404021619
75.61613028 245.098584950696 22.0528245526456
75.64213028 330.660620543406 24.2227486090054
75.66813028 347.33858918232 24.6383389814018
75.69413028 440.5515085355 26.6143572697175
75.72013028 462.986796467925 26.9936462193349
75.74613028 382.294136941568 25.1047780515244
75.77213028 314.94631913675 24.1859947568755
75.79813028 263.98605851646 23.2751705307733
75.82413028 248.237271434528 22.3976672850839
75.85013028 226.373372142262 21.2778463262738
75.87613028 184.457769149247 22.8462078311924
75.90213028 223.84458424743 24.7987536843047
75.92813028 222.15131663604 25.917720107892
75.95413028 174.211742355628 24.4311295610265
75.98013028 221.695699778334 23.8877447359612
76.00613028 217.210419086831 20.8427646480418
76.03213028 210.305595388535 20.5088076390869
76.05813028 205.485903153026 20.272439574606
76.08413028 211.349575801635 20.5596486254816
76.11013028 210.741559141316 20.5300540253218
76.13613028 199.765200466345 19.9882565756169
76.16213028 202.728168046206 20.1359463669432
76.18813028 213.639851224995 20.6707450869578
76.21413028 206.336863444761 20.3143724217491
76.24013028 191.5052144813 19.5706522365148
76.26613028 188.769330337566 19.4303541057576
76.29213028 196.414095428677 19.8198938154914
76.31813028 206.31487250286 20.3132898617068
76.34413028 199.239269509218 19.961927237079
76.37013028 197.832110215019 19.8913101737929
76.39613028 220.27612722852 20.9893366845415
76.42213028 215.741465743136 20.7721672313284
76.44813028 192.867342738945 19.640129466933
76.47413028 188.072640861139 19.3944652342434
76.50013028 188.323472349649 19.4073940728604
76.52613028 194.758640248934 19.7361921478756
76.55213028 193.244800496144 19.659338773018
76.57813028 194.92335591728 19.7445362527095
76.60413028 188.457182558372 19.4142825032692
76.63013028 187.896312601042 19.3853714228561
76.65613028 208.603261841659 20.4256339848564
76.68213028 205.007895683962 20.2488466675987
76.70813028 200.723353080695 20.03613501056
76.73413028 201.579762819755 20.0788327758241
76.76013028 201.608432801952 20.0802605960158
76.78613028 202.536315663328 20.1264162564192
76.81213028 213.602983354599 20.6689614327667
76.83813028 217.672310737124 20.8649136464604
76.86413028 205.714333060549 20.2837044476865
76.89013028 211.970875976173 20.5898458457645
76.91613028 205.042038830697 20.2505327747542
76.94213028 199.547195726523 19.9773469573176
76.96813028 221.26808350206 21.0365436087804
76.99413028 225.518489314794 21.2376311915804
77.02013028 226.690194908163 21.2927309149467
77.04613028 231.41792326431 21.4665517595391
77.07213028 218.219604510495 20.8911275191405
77.09813028 213.339801860069 20.6562243336031
77.12413028 224.718211340008 21.1999156290778
77.15013028 254.086510754308 21.2937304093349
77.17613028 249.794593919879 21.314868884624
77.20213028 219.553034420097 20.9548578816511
77.22813028 233.411475859546 21.6160802080737
77.25413028 266.527034610237 22.3265498070451
77.28013028 280.779878655742 22.4930540685942
77.30613028 278.475931018399 22.1285062169901
77.33213028 263.318471891169 21.9203087063736
77.35813028 241.637094730093 21.8864322868044
77.38413028 249.603866471387 22.3955686066026
77.41013028 247.191205634011 22.0705586782291
77.43613028 233.972897390792 21.6320547979517
77.46213028 254.232053132373 22.2423392361094
77.48813028 245.627578537878 22.6818179056683
77.51413028 260.244598027911 23.2236542643412
77.54013028 255.135064413402 22.9996418658113
77.56613028 267.637448565721 22.9123642522542
77.59213028 338.75816294166 24.1076079549812
77.61813028 346.769321468633 24.3890672219259
77.64413028 356.320569067976 24.5225242277153
77.67013028 384.986273597016 25.0685034799954
77.69613028 347.730699357067 24.4775815152463
77.72213028 391.839142889758 25.2865153681006
77.74813028 406.499890185993 25.7811780027365
77.77413028 479.583951357267 27.131009144611
77.80013028 520.698649987616 28.296704907734
77.82613028 539.735798155469 29.640993475907
77.85213028 628.201194547283 31.2294370970917
77.87813028 735.708388349427 33.1004647090928
77.90413028 869.277096828813 35.3021387059536
77.93013028 1147.26697620378 38.7429347676738
77.95613028 1668.71207434314 45.4021560818358
77.98213028 2417.59054001842 53.2367876732019
78.00813028 3749.90788225517 65.0688337298771
78.03413028 4804.14213889232 72.9767050000653
78.06013028 4091.14129984994 68.1305399465866
78.08613028 2439.89762481021 55.5068238014646
78.11213028 1314.98503713756 45.4572828988847
78.13813028 849.933485128808 41.8736829357371
78.16413028 604.957871893725 42.6169759329865
78.19013028 449.338000167113 46.9761825193553
78.21613028 384.744202711823 54.3777012040456
78.24213028 340.718687497972 64.8153372475402
78.26813028 388.39903023175 71.3479368784304
78.29413028 159.512881868151 63.6415285948313
78.32013028 230.292114007155 50.3957892491024
78.34613028 284.703848751433 39.32444512096
78.37213028 252.283149384249 32.779772366267
78.39813028 222.521519514646 28.4649738725717
78.42413028 226.726535268788 25.8526959081351
78.45013028 217.712408925279 24.4348853231349
78.47613028 212.144893752315 23.5663435095418
78.50213028 193.079063335839 23.7066127049683
78.52813028 278.71766220406 21.0428489988939
78.55413028 219.517033554775 20.9531397911995
78.58013028 203.339946286347 22.0167197353892
78.60613028 205.146557163729 21.320267056635
78.63213028 218.963473087717 20.9267041402949
78.65813028 205.377441866758 20.2670886842071
78.68413028 209.422102725598 20.465683605763
78.71013028 202.433232672931 20.1212938288238
78.73613028 196.381556701294 19.8182520269218
78.76213028 209.111584790442 20.4505053624815
78.78813028 230.86157730506 21.0328793095437
78.81413028 226.560718472464 20.7148728217419
78.84013028 196.695814407673 19.8341026723002
78.86613028 193.386923138468 19.6665667130015
78.89213028 175.577414629979 18.7391256268791
78.91813028 197.178219230178 19.8584097666544
78.94413028 206.085322290896 20.3019862225791
78.97013028 195.976319067345 19.7977937693747
78.99613028 177.575300670944 18.845439802294
79.02213028 180.882277489839 19.0201092262815
79.04813028 186.875084261181 19.3326192876796
79.07413028 197.675587786203 19.8834397319077
79.10013028 202.060396111887 20.1027558365457
79.12613028 170.841412517114 18.484664590796
79.15213028 173.631883535699 18.6350145444375
79.17813028 198.396233504243 19.9196502732474
79.20413028 187.300910867564 19.3546330819039
79.23013028 182.100190538992 19.0840347169561
79.25613028 178.871622123242 18.9141017298333
79.28213028 178.714800668285 18.9058086665599
79.30813028 177.019643605867 18.8159317391335
79.33413028 183.672916853096 19.1662681215252
79.36013028 190.826186803767 19.5359252047998
79.38613028 191.127509164188 19.5513431336156
79.41213028 187.469454202898 19.3633392886092
79.43813028 177.940169542699 18.8647909897088
79.46413028 171.014660912515 18.4940347632697
79.49013028 175.151968589329 18.7164082339176
79.51613028 180.118869709771 18.9799299108174
79.54213028 170.784278417625 18.4815734404636
79.56813028 165.470047606521 18.191758991726
79.59413028 181.736981584651 19.0649931332089
79.62013028 192.826363212111 19.6380428358893
79.64613028 185.047933022327 19.2378758194519
79.67213028 188.569662956559 19.4200753323235
79.69813028 196.449535288079 19.8216818301616
79.72413028 190.439993869644 19.5161468466316
79.75013028 167.196010619849 18.2863889611836
79.77613028 167.715915470188 18.314798140858
79.80213028 199.441800975779 19.9720705474309
79.82813028 201.139423106422 20.0568902428279
79.85413028 177.938444829906 18.8646995645256
79.88013028 179.624797888159 18.9538807576791
79.90613028 186.465238143428 19.3114079312425
79.93213028 186.735522646531 19.3253989685352
79.95813028 193.381934088939 19.6663130295914
79.98413028 190.205336022304 19.5041193609096
80.01013028 189.470260444412 19.4663946556322
80.03613028 193.531742755425 19.6739290816768
80.06213028 178.947437101019 18.9181096889208
80.08813028 173.260881592897 18.6150950356369
80.11413028 179.003338666391 18.9210643816034
80.14013028 175.597179383064 18.7401803290718
80.16613028 181.585285126178 19.0570346657699
80.19213028 184.520178451802 19.210423131821
80.21813028 184.139873353143 19.1906161106486
80.24413028 182.934306278178 19.1276922956314
80.27013028 173.213840146576 18.6125678049309
80.29613028 166.614599124467 18.2545665039993
80.32213028 187.717905103928 19.3761660347927
80.34813028 174.0809266451 18.659095725415
80.37413028 178.200368365537 18.8785787794282
80.40013028 178.584778764567 18.8989300630786
80.42613028 174 18.6547581061776
80.45213028 172.955585230505 18.5986873316643
80.47813028 168.872120658103 18.3778192753168
80.50413028 195.655586478044 19.7815867148237
80.53013028 180.303696591724 18.9896654310561
80.55613028 178.66023224513 18.9029221151191
80.58213028 199.631782927587 19.9815806645814
80.60813028 176.113820513513 18.7677287125274
80.63413028 158.388435867126 17.7982266457715
80.66013028 177.917737888345 18.8636018770724
80.68613028 175.542271472385 18.7372501436249
80.71213028 161.830017648844 17.9905540575516
80.73813028 184.613633835613 19.2152873429263
80.76413028 179.986542401988 18.97295667006
80.79013028 170.745817132745 18.4794922621129
80.81613028 179.1738432696 18.930073600998
80.84213028 166.377666563244 18.2415825280179
80.86813028 196.776086885618 19.8381494543023
80.89413028 164.368658401684 18.1311146045512
80.92013028 175.853380486837 18.7538465647363
80.94613028 174.802694991806 18.6977375632351
80.97213028 180.199047935762 18.984153809731
80.99813028 178.842384162132 18.9125558379681
81.02413028 167.840039150437 18.3215741218071
81.05013028 169.046124445611 18.3872849787896
81.07613028 165.803835835242 18.2100980686674
81.10213028 190.925261070171 19.5409959352215
81.12813028 172.240892143333 18.560220480551
81.15413028 161.277401694597 17.9598107837804
81.18013028 169.550432314223 18.4146915431252
81.20613028 175.219560254201 18.7200192443384
81.23213028 179.839922888819 18.9652272798835
81.25813028 186.086122176343 19.2917662320661
81.28413028 184.656679887101 19.217527410523
81.31013028 177.12669424217 18.8216202406791
81.33613028 219.162154031561 19.9812341189375
81.36213028 169.30388950732 18.4012982969855
81.38813028 177.881463421581 18.8616787917503
81.41413028 186.17343580859 19.2962916545429
81.44013028 191.623081855867 19.5766739695929
81.46613028 184.041826846547 19.1855063444542
81.49213028 191.762137962664 19.5837758342289
81.51813028 182.201888921047 19.0893629501378
81.54413028 180.889305314989 19.0204787171611
81.57013028 189.605174821393 19.4733240522204
81.59613028 190.842857272291 19.5367785098921
81.62213028 195.841387329346 19.7909771021719
81.64813028 185.827710537268 19.2783666599258
81.67413028 191.980458472829 19.5949206925075
81.70013028 175.474049974341 18.7336088340896
81.72613028 182.119056506142 19.0850232646514
81.75213028 191.668280620262 19.57898264059
81.77813028 195.992094781774 19.798590595382
81.80413028 189.66053041752 19.4761664820118
81.83013028 184.126170519442 19.1899020591269
81.85613028 181.158433084217 19.03462282706
81.88213028 175.217966839708 18.7199341259369
81.90813028 177.562128769899 18.8447408456524
81.93413028 173.564191262717 18.6313816590567
81.96013028 189.860678972275 19.4864403610447
81.98613028 201.888807633886 20.0942184537685
82.01213028 206.503436831703 20.3225705476302
82.03813028 204.664509921924 20.2318812729773
82.06413028 188.609842598162 19.4221441966721
82.09013028 182.012253429758 19.0794262717598
82.11613028 181.961287123357 19.0767548143471
82.14213028 186.186695605396 19.2969788104458
82.16813028 183.435250909451 19.1538638874484
82.19413028 174.23618243459 18.6674145202055
82.22013028 176.682855344524 18.7980241166206
82.24613028 186.239141389009 19.2996964426392
82.27213028 186.876374617689 19.3326860326075
82.29813028 181.002560173915 19.0264321497182
82.32413028 178.666666666667 18.9032625050104
82.35013028 171.535389982215 18.5221699583075
82.37613028 161.439186157553 17.9688166642967
82.40213028 166.931824465766 18.2719361024368
82.42813028 167.160250341441 18.2844332885348
82.45413028 159.37358583392 17.8534918620375
82.48013028 162.507819765262 18.0281901346342
82.50613028 159.155310433805 17.8412617509976
82.53213028 177.583962371868 18.8458994145606
82.55813028 186.562007622687 19.3164182820049
82.58413028 162.924158126946 18.0512691036916
82.61013028 165.167563863558 18.1751238710254
82.63613028 170.561729989403 18.4695278764457
82.66213028 168.10447860379 18.3360016690548
82.68813028 172.839539145003 18.5924468075078
82.71413028 161.883680929884 17.9935366690311
82.74013028 154.617156120287 17.585059347087
82.76613028 173.256890229908 18.6148806190052
82.79213028 187.089987743449 19.3437322015918
82.81813028 187.481292344895 19.3639506477834
82.84413028 199.030927098118 19.9514875183841
82.87013028 190.324016611376 19.5102033106462
82.89613028 171.502511150491 18.5203947663375
82.92213028 178.474377603279 18.8930874979861
82.94813028 182.346359753151 19.0969295832158
82.97413028 188.454008441732 19.4141190086871
83.00013028 178.839162611114 18.9123854979278
83.02613028 189.398499300687 19.4627078948787
83.05213028 178.274054347696 18.8824815290626
83.07813028 182.299509751857 19.094476151592
83.10413028 164.883537772984 18.1594899583102
83.13013028 167.060719708977 18.2789890152042
83.15613028 171.906940218609 18.5422188649907
83.18213028 184.089763046963 19.1880047449943
83.20813028 176.004236598573 18.7618888493975
83.23413028 159.333346045598 17.8512378307835
83.26013028 180.14504749153 18.9813090956093
83.28613028 170.545713071223 18.4686606483103
83.31213028 183.728799349948 19.1691835689446
83.33813028 174.526343920554 18.6829517967881
83.36413028 167.357900339581 18.2952398366122
83.39013028 169.998107559363 18.4389862822967
83.41613028 160.106319578207 17.8944862780806
83.44213028 167.18260216372 18.2856556985917
83.46813028 182.845708645596 19.1230598307696
83.49413028 172.45785346974 18.5719063894765
83.52013028 182.763027214334 19.1187356911661
83.54613028 175.815280699159 18.7518148827871
83.57213028 176.573112382253 18.7921852046138
83.59813028 158.881701447237 17.8259194123185
83.62413028 188.879642986278 19.4360306125648
83.65013028 177.598921456871 18.846693155929
83.67613028 173.032849612121 18.6028411600014
83.70213028 177.948003609359 18.8652062596389
83.72813028 172.864663125327 18.593798058779
83.75413028 172 18.5472369909914
83.78013028 185.6072951366 19.2669299649218
83.80613028 162.783990396325 18.0435024535884
83.83213028 161.876186350748 17.993120149143
83.85813028 155.554028074794 17.6382554735322
83.88413028 179.404025638952 18.9422293111952
83.91013028 187.468918621679 19.3633116290411
83.93613028 173.236119109764 18.6137647513749
83.96213028 163.0853341496 18.0601956882864
83.98813028 165.445747228629 18.190423152232
84.01413028 177.830277921106 18.8589648666678
84.04013028 168.812782996308 18.3745902265225
84.06613028 173.562395398344 18.6312852695859
84.09213028 166.914820865892 18.2710054931792
84.11813028 165.738220474923 18.2064944717495
84.14413028 165.717941533473 18.2053806075826
84.17013028 160.188108579701 17.8990563203595
84.19613028 172.756250980945 18.5879665902941
84.22213028 171.60652764896 18.5260102369053
84.24813028 148.740165852358 17.2476181458402
84.27413028 152.130692815086 17.4430899106257
84.30013028 166.925461195803 18.2715878453846
84.32613028 183.74703083527 19.1701346283885
84.35213028 211.532024109326 19.5438379855371
84.37813028 189.140306855675 19.4494373623339
84.40413028 176.026551991314 18.7630782118134
84.43013028 177.485855718651 18.8406929659528
84.45613028 186.59143005583 19.3179414046026
84.48213028 179.015585739975 18.9217116424479
84.50813028 175.629475199192 18.74190359591
84.53413028 177.832774770209 18.8590972620753
84.56013028 182.194538352567 19.0889778852911
84.58613028 186.304756749328 19.3030959563137
84.61213028 189.197655500563 19.4523857406007
84.63813028 176.309391274637 18.7781464087719
84.66413028 173.972286626153 18.6532724542453
84.69013028 174.263467808241 18.6688761208725
84.71613028 176.486757682674 18.7875893974014
84.74213028 192.255545229087 19.608954343824
84.76813028 177.308342975648 18.831268835405
84.79413028 176.848452437777 18.8068313353301
84.82013028 190.804886458584 19.5348348576887
84.84613028 173.347778229872 18.6197625242575
84.87213028 164.779065525369 18.1537360080711
84.89813028 161.863629863006 17.9924222862296
84.92413028 160.023917487741 17.8898807982468
84.95013028 163.973648134227 18.1093151794444
84.97613028 164.465678855888 18.1364648625849
85.00213028 176.966920188979 18.8131294679529
85.02813028 183.25597005111 19.14450156317
85.05413028 189.351732546497 19.4603048561166
85.08013028 192.408982053849 19.6167776178377
85.10613028 175.480634145893 18.7339602938564
85.13213028 189.082413949054 19.4464605493676
85.15813028 175.696028099325 18.7454542809357
85.18413028 175.287420871858 18.7236439226908
85.21013028 166.96441698371 18.2737197627473
85.23613028 183.495255450771 19.1569963956133
85.26213028 193.794601506634 19.6872853134521
85.28813028 200.067555235338 20.0033774765832
85.31413028 185.493767293058 19.2610366955187
85.34013028 191.972701913907 19.5945248431243
85.36613028 189.634640657072 19.4748371319029
85.39213028 189.804341343005 19.4835490269614
85.41813028 170.694844470172 18.4767337194739
85.44413028 166.08344891889 18.2254464372695
85.47013028 191.89970823607 19.5907992810947
85.49613028 197.840174480583 19.8917155861722
85.52213028 196.601696793012 19.8293568626424
85.54813028 173.866281110766 18.6475886436164
85.57413028 194.874174470399 19.7420452066344
85.60013028 210.164775815074 20.5019401918489
85.62613028 210.287471484324 20.5079239068378
85.65213028 187.659786030254 19.3731662889809
85.67813028 206.414409491504 20.3181893628101
85.70413028 202.72989508333 20.1360321356185
85.73013028 188 19.3907194296653
85.75613028 188.449687979238 19.413896465122
85.78213028 192.090403884966 19.6005308032699
85.80813028 187.479331077028 19.3638493630284
85.83413028 205.42212644279 20.2692933494382
85.86013028 206.591103280653 20.3268838379449
85.88613028 204.024326419329 20.2002141780392
85.91213028 177.480645150724 18.8404164046724
85.93813028 181.781761029431 19.0673417669811
85.96413028 197.920744277141 19.8957655935699
85.99013028 193.210941338882 19.6576164037699
86.01613028 176.049594410298 18.7643062440527
86.04213028 190.47917520778 19.5181543803599
86.06813028 178.287606814467 18.8831992424201
86.09413028 157.362732666097 17.7405035253286
86.12013028 193.688051729433 19.6818724581496
86.14613028 190.911539168141 19.5402937116176
86.17213028 198.167506894915 19.9081645007728
86.19813028 195.574390880167 19.7774816839843
86.22413028 184.320208012916 19.200010834003
86.25013028 166.38702118532 18.2420953393693
86.27613028 182.026373258624 19.0801663126203
86.30213028 170.976094370855 18.4919492953477
86.32813028 182.797092853308 19.1205174016452
86.35413028 178.879006796933 18.9144921579688
86.38013028 182.005057876766 19.0790491312731
86.40613028 189.453101829045 19.4655131876375
86.43213028 188.989902461236 19.441702726934
86.45813028 189.218973206756 19.4534816013358
86.48413028 177.328116409228 18.8323188380628
86.51013028 189.221740716144 19.4536238637506
86.53613028 186.809585162479 19.3292309812097
86.56213028 192.169345544998 19.6045579162091
86.58813028 188.288445453673 19.4055891667155
86.61413028 201.532570389796 20.0764822810071
86.64013028 191.831929774825 19.5873392667215
86.66613028 204.312513308241 20.2144756700856
86.69213028 203.1011810156 20.1544625835372
86.71813028 207.472877586971 20.3702173570618
86.74413028 192.736449798321 19.6334637697132
86.77013028 206.808840775211 20.3375928160248
86.79613028 213.001766644754 20.6398530345908
86.82213028 237.601829170072 20.9048521356522
86.84813028 208.012485952882 20.3966902193901
86.87413028 194.654520818019 19.7309158843688
86.90013028 205.649242276609 20.280495175247
86.92613028 213.732956116441 20.6752487828534
86.95213028 218.506284173168 20.9048455709755
86.97813028 224.048543345216 21.0174104115088
87.00413028 230.196924746614 20.9533591241411
87.03013028 251.662743665078 21.4720542209786
87.05613028 244.682193695782 21.5152147082786
87.08213028 287.233696966919 22.7598750050311
87.10813028 383.497250944446 24.6067629583609
87.13413028 495.70884935701 26.3670187265045
87.16013028 623.017135046624 28.728077334493
87.18613028 738.354043600522 30.8606660230076
87.21213028 730.870180962297 30.8258241404137
87.23813028 608.497796395667 28.8207284118684
87.26413028 494.402004594071 26.8523799613395
87.29013028 389.391719151361 25.1232595317256
87.31613028 314.272644800121 23.6780820113073
87.34213028 270.630824880741 23.2139024531072
87.36813028 235.195607582254 24.0117105601236
87.39413028 218.462097167054 25.7739397542231
87.42013028 226.286876903339 28.1393933829108
87.44613028 211.165007562532 29.9344284830013
87.47213028 188.908868036237 30.3245866572145
87.49813028 197.534723159947 29.2794897368815
87.52413028 173.582967044188 26.7705589569904
87.55013028 163.853655154343 24.4715785702399
87.57613028 169.875501930537 22.7368451001943
87.60213028 195.85298622797 22.0303614318494
87.62813028 212.749853605786 20.6276442477461
87.65413028 200.868921116767 20.0433989690754
87.68013028 190.919252941337 19.5406884700277
87.70613028 187.371046199102 19.3582564400362
87.73213028 181.821317193947 19.0694162046953
87.75813028 171.768555023173 18.5347541134579
87.78413028 174.990719707585 18.7077908747978
87.81013028 169.916669050232 18.4345691053646
87.83613028 168.632289289204 18.3647645936018
87.86213028 166.747285605122 18.2618337307688
87.88813028 180.896883758043 19.0208771489668
87.91413028 173.515824737854 18.6287855072656
87.94013028 181.085927553222 19.0308133064892
87.96613028 188.69831296429 19.4266987913176
87.99213028 188.727211437864 19.4281862991821
88.01813028 165.243318694607 18.1792914435413
88.04413028 165.613333955716 18.199633730145
88.07013028 154.515073140658 17.5792532913465
88.09613028 164.722589624903 18.1506247619691
88.12213028 175.67880298105 18.7445353626624
88.14813028 166.856383697544 18.2678068578329
88.17413028 169.972312667668 18.4375872970228
88.20013028 170.703766443475 18.4772165892742
88.22613028 187.335991554093 19.3564455184361
88.25213028 166.100381983931 18.2263755027669
88.27813028 171.023731545127 18.4945252193792
88.30413028 173.746590122803 18.6411689613502
88.33013028 174.081425796788 18.6591224765147
88.35613028 156.429757205824 17.6878352098737
88.38213028 177.14491301514 18.8225881862798
88.40813028 177.637201684736 18.8487241841317
88.43413028 201.129778138717 20.0564093565482
88.46013028 182.085924375136 19.0832871578843
88.48613028 183.151596704099 19.139048915978
88.51213028 179.762140286995 18.9611255091566
88.53813028 174.412373040217 18.6768505396503
88.56413028 167.646885406324 18.3110286661522
88.59013028 179.940672726225 18.9705388814459
88.61613028 175.973815862069 18.760267368141
88.64213028 170.693401422504 18.4766556185098
88.66813028 173.293506508531 18.6168475585171
88.69413028 175.933713728313 18.758129636417
88.72013028 165.060835970594 18.1692507259157
88.74613028 189.504416303488 19.4681491828827
88.77213028 178.691906908609 18.9045976899065
88.79813028 194.214526948382 19.7086035501444
88.82413028 176.822709629142 18.8054624845624
88.85013028 178.995768903847 18.9206643067228
88.87613028 175.710586933147 18.7462309242763
88.90213028 180.110742973146 18.9795017307171
88.92813028 169.446001144812 18.4090195906687
88.95413028 178.511036667625 18.8950277410553
88.98013028 172.494688942423 18.5738896810778
89.00613028 155.353264106662 17.6268694955549
89.03213028 149.846157184812 17.311623678027
89.05813028 172.74778878864 18.5875113336154
89.08413028 164.112401183037 18.1169755303161
89.11013028 157.523532154878 17.7495651864984
89.13613028 169.570085454348 18.4157587654893
89.16213028 167.887418376773 18.3241599194491
89.18813028 170.33755574898 18.4573863669253
89.21413028 172.886726926304 18.5949846424408
89.24013028 165.154405291687 18.1743998685892
89.26613028 170.235188779893 18.4518394085735
89.29213028 171.670760108345 18.5294770626883
89.31813028 167.893964411257 18.3245171511425
89.34413028 178.784755559634 18.9095084843385
89.37013028 160.38411602145 17.9100036862894
89.39613028 161.706197643415 17.9836702396043
89.42213028 190.173706468875 19.5024976076847
89.44813028 176.836933007273 18.8062188122585
89.47413028 174.581335695154 18.6858949849962
89.50013028 188.902457530688 19.4372044044759
89.52613028 174.271121434801 18.6692860835545
89.55213028 155.795711422944 17.6519523805694
89.57813028 176.419531546854 18.7840108361795
89.60413028 176.016543818886 18.7625448070823
89.63013028 169.393133717268 18.4061475446258
89.65613028 166.20786930094 18.2322718990772
89.68213028 163.732063686678 18.0959699207685
89.70813028 162.039422541794 18.0021900079848
89.73413028 169.147680524526 18.3928073183256
89.76013028 173.438904492426 18.6246559427242
89.78613028 179.445418129208 18.9444143815114
89.81213028 171.072747588502 18.4971753296822
89.83813028 174.772104203128 18.6961014226564
89.86413028 174.960226111998 18.7061608093162
89.89013028 175.090922958924 18.7131463393479
89.91613028 180.912051032174 19.0216745336563
89.94213028 166.68771138824 18.2585712139937
89.96813028 168.41620706338 18.3529946909696
89.99413028 177.125831885772 18.8215744232926
90.02013028 164.305148319903 18.1276114433151
90.04613028 156.394556225834 17.6858449742066
90.07213028 164.492611412934 18.137949796652
90.09813028 172.928925658078 18.5972538649166
90.12413028 178.956888299363 18.9186092670346
90.15013028 176.966068837414 18.8130842148444
90.17613028 165.085136348395 18.1705881219291
90.20213028 165.992993567708 18.2204826263032
90.22813028 179.039273028811 18.9229634586558
90.25413028 175.349395361551 18.7269535889611
90.28013028 167.899609335469 18.3248252016476
90.30613028 170 18.4390889145858
90.33213028 175.600611447647 18.7403634675343
90.35813028 178.290705747686 18.8833633523102
90.38413028 165.31449511522 18.1832062692596
90.41013028 165.490077280455 18.192859988493
90.43613028 165.609307870696 18.1994125108859
90.46213028 178.191749450325 18.8781222292009
90.48813028 166.990702346568 18.275158130455
90.51413028 171.731392775313 18.5327490014468
90.54013028 169.874653082983 18.4322897700195
90.56613028 173.766884100935 18.642257594022
90.59213028 179.328985121806 18.9382673506214
90.61813028 175.654523996107 18.7432400612118
90.64413028 176.050744788004 18.7643675506532
90.67013028 172.37897831261 18.5676588891874
90.69613028 164.133153234646 18.1181209420097
90.72213028 160.434509700278 17.9128171821341
90.74813028 180.655391854923 19.0081767592225
90.77413028 171.509644232419 18.5207799097349
90.80013028 179.276089945228 18.935474113168
90.82613028 169.979391959044 18.4379712527731
90.85213028 172.929087029744 18.5972625420917
90.87813028 171.422240380076 18.5160600765971
90.90413028 174.858185918085 18.7007051160156
90.93013028 169.120107129486 18.3913081171235
90.95613028 181.776193612961 19.0670497777166
90.98213028 179.728050930832 18.959327568816
91.00813028 176.474119655342 18.7869167058005
91.03413028 167.3429094738 18.2944204321318
91.06013028 160.144428046387 17.8966157720607
91.08613028 162.705972946931 18.0391780825475
91.11213028 173.507898126768 18.628359999032
91.13813028 176.496878084778 18.78812806454
91.16413028 173.273797253507 18.6157888499793
91.19013028 191.333333333333 19.5618676681616
91.21613028 190.978285837633 19.5437092609174
91.24213028 163.357235784389 18.0752447167052
91.26813028 171.937909248681 18.5438889798597
91.29413028 160.205039320499 17.9000021966758
91.32013028 163.243303657924 18.0689404037937
91.34613028 183.236755299108 19.1434978673757
91.37213028 156.67646664987 17.7017776875584
91.39813028 155.962149479755 17.6613787389181
91.42413028 177.154843679822 18.8231157718281
91.45013028 181.744598781564 19.0653926674257
91.47613028 160.685995355957 17.9268511097715
91.50213028 156.859596568055 17.7121199503648
91.52813028 158.453892180116 17.8019039532358
91.55413028 158.666666666667 17.8138522878499
91.58013028 165.074299924782 18.1699917404925
91.60613028 157.361541210199 17.7404363649939
91.63213028 171.939906946103 18.5439967076196
91.65813028 178.605339371144 18.9000179561367
91.68413028 182.113596670783 19.0847371829315
91.71013028 174.974537385898 18.7069258503848
91.73613028 154.8773532357 17.5998496150223
91.76213028 165.68049297182 18.203323486211
91.78813028 183.102757069083 19.1364969139643
91.81413028 177.253056206737 18.8283327040254
91.84013028 162.273942734734 18.0152126123859
91.86613028 163.254404385562 18.0695547474509
91.89213028 180.263813652024 18.9875650704362
91.91813028 166.465614677317 18.246403189523
91.94413028 189.884147067036 19.48764465332
91.97013028 181.335099124341 19.0439018651295
91.99613028 183.05681220991 19.1340958610492
92.02213028 182.906190945737 19.1262223633281
92.04813028 176.698887299382 18.7988769504661
92.07413028 164.61641234984 18.1447740327533
92.10013028 162.251074399766 18.013943177426
92.12613028 175.310533825598 18.7248783080477
92.15213028 174.341570829159 18.6730592474377
92.17813028 178.843702267672 18.9126255325733
92.20413028 176.977001837299 18.813665343962
92.23013028 162.48767847829 18.0270728893123
92.25613028 158.46315425776 17.802424231422
92.28213028 166.462573566489 18.2462365197039
92.30813028 167.488298777189 18.3023659004615
92.33413028 146.580639359079 17.1219531221809
92.36013028 151.768513944973 17.4223140796493
92.38613028 183.828451983379 19.1743814493912
92.41213028 187.987413438885 19.3900703164731
92.43813028 181.821108387897 19.0694052549049
92.46413028 174.750769752734 18.6949602702298
92.49013028 171.194244828846 18.5037425851554
92.51613028 170.878518650087 18.4866718827423
92.54213028 166.657808871943 18.2569334156612
92.56813028 170.636063165542 18.4735520767146
92.59413028 173.386138289816 18.6218225901664
92.62013028 170.379580396738 18.4596630736716
92.64613028 173.691572306683 18.6382173131811
92.67213028 169.83071692607 18.4299059642783
92.69813028 164.996721480339 18.165721647121
92.72413028 172.582916397295 18.5786391534631
92.75013028 178.175670061083 18.8772704627064
92.77613028 182.162610389819 19.0873052257158
92.80213028 172.962780783491 18.5990742126317
92.82813028 165.991660425484 18.2204094589273
92.85413028 164.124241649366 18.1176290749847
92.88013028 163.538918623065 18.085293396739
92.90613028 177.814904165274 18.8581496528834
92.93213028 179.033408910532 18.9226535618307
92.95813028 170.203746639653 18.4501353187261
92.98413028 184.290144124954 19.198444943534
93.01013028 192.031747522555 19.5975379842752
93.03613028 193.08991659188 19.6514588054872
93.06213028 190.439310245925 19.5161118179788
93.08813028 167.75515524757 18.3169405331551
93.11413028 185.03882363584 19.2374023005103
93.14013028 182.295425844445 19.0942622713969
93.16613028 180.617311135775 19.0061732674294
93.19213028 178.839057354336 18.9123799324324
93.21813028 181.156867418759 19.034540573324
93.24413028 185.234217988627 19.2475566235628
93.27013028 181.276851076589 19.0408430000664
93.29613028 183.917058296471 19.1790019707216
93.32213028 194.637615501917 19.7300590724872
93.34813028 223.617690847756 21.147940365329
93.37413028 207.531886766079 20.3731139871193
93.40013028 199.560400025263 19.9780079099626
93.42613028 186.236188790765 19.2995434552616
93.45213028 191.304119089414 19.5603741829963
93.47813028 194.168530622981 19.7062695923395
93.50413028 190.49622221019 19.5190277529487
93.53013028 189.048425201009 19.4447126592814
93.55613028 214 20.6881608655772
93.58213028 215.756026284469 20.7728681834969
93.60813028 254.859309613969 20.8264994534191
93.63413028 235.011164894655 20.9826018082701
93.66013028 220.166688635898 21.2036076221678
93.68613028 240.758751413288 21.3960012671989
93.71213028 305.543590103812 22.4965679341752
93.73813028 309.484371391352 22.2284765564073
93.76413028 283.585229812002 21.8014053049699
93.79013028 295.785925294045 22.141092758196
93.81613028 393.543368119395 24.1814587238701
93.84213028 395.468218668045 24.4291725307894
93.86813028 393.868073371901 24.9449794278479
93.89413028 486.164805390103 26.9442137147547
93.92013028 575.565720518282 28.6847957157591
93.94613028 880.582653663256 33.3128520484025
93.97213028 1302.64392824764 39.0883773163345
93.99813028 1911.21786260524 46.5838565179141
94.02413028 2165.08516303937 49.7006516065929
94.05013028 1815.01195413346 45.9932522070524
94.07613028 1257.24212751606 39.2780278360371
94.10213028 775.954501151257 33.1253587777983
94.12813028 453.039590381864 29.0689224500018
94.15413028 400.576422916978 28.1691630963351
94.18013028 348.147469307474 27.6412768181916
94.20613028 281.210223249351 28.06542971628
94.23213028 263.526530015531 30.2075111959852
94.25813028 195.866968152168 34.2826722305103
94.28413028 164.497370406796 40.0778344856687
94.31013028 207.612477650854 46.5633847617171
94.33613028 202.117075559492 47.7001769721791
94.36213028 184.240827619362 43.1810558603669
94.38813028 163.30684595436 36.174652074161
94.41413028 220.952284524056 30.3956709008289
94.44013028 250.047256275164 26.2630553079454
94.46613028 209.524724556733 24.4403931930855
94.49213028 186.096834264917 22.7855429669243
94.51813028 197.231368939651 19.861086019634
94.54413028 202.18586967854 20.1089964781209
94.57013028 205.867924283975 20.2912751833873
94.59613028 182.686156727613 19.1147145794863
94.62213028 185.880998991929 19.2811306199574
94.64813028 180.82553960959 19.0171259452942
94.67413028 183.13480997396 19.1381718026545
94.70013028 183.723023127429 19.1688822380143
94.72613028 186.256910768909 19.3006171284189
94.75213028 170.755539608213 18.4800183770586
94.77813028 180.72868394208 19.0120321871219
94.80413028 185.090499607482 19.2400883369844
94.83013028 179.46607360455 18.945504670214
94.85613028 162.618870445058 18.0343489178322
94.88213028 159.060612127864 17.8359531356115
94.90813028 173.131055166046 18.6081194732862
94.93413028 172.874490857564 18.594326600206
94.96013028 170.724727301124 18.4783509708591
94.98613028 157.361390843375 17.7404278890547
95.01213028 156.528476948112 17.6934155520133
95.03813028 158.756231912426 17.8188794211323
95.06413028 155.451149241677 17.6324217985889
95.09013028 162.009253397138 18.000514070278
95.11613028 161.073745275035 17.948467637937
95.14213028 171.775365361767 18.5351215459606
95.16813028 173.5498799888 18.6306135158669
95.19413028 163.304370681178 18.0723197559792
95.22013028 163.092116739165 18.0605712389816
95.24613028 157.151650494655 17.7286012135563
95.27213028 157.098684166508 17.7256133415184
95.29813028 165.821977100471 18.2110942614919
95.32413028 165.177310056203 18.1756601011464
95.35013028 152.606333025838 17.4703367469455
95.37613028 150.450832000766 17.3465173450331
95.40213028 149.961166829893 17.3182658964397
95.42813028 148.196559767088 17.2160715476608
95.45413028 160.077492256191 17.8928752444201
95.48013028 172.472323790975 18.5726855242302
95.50613028 176.410977426931 18.7835554369736
95.53213028 164.946376943417 18.162950032603
95.55813028 160.41569752368 17.9117669437541
95.58413028 164.617059544013 18.1448097010695
95.61013028 157.746370928742 17.7621153542444
95.63613028 157.37196637789 17.741024005276
95.66213028 171.682899600817 18.5301321960108
95.68813028 160.953809051484 17.9417841393482
95.71413028 147.012921163037 17.1471817604548
95.74013028 153.061906516224 17.496394286608
95.76613028 173.263255824198 18.6152225785349
95.79213028 167.249196142055 18.2892972058554
95.81813028 158.393388487117 17.798504908397
95.84413028 164.347284580608 18.1299357186179
95.87013028 164.645591871728 18.1463821116898
95.89613028 170.64886953763 18.4742452910873
95.92213028 155.389151034787 17.6289052998073
95.94813028 152.071073488156 17.4396716418719
95.97413028 139.703438197728 16.715468177573
96.00013028 180.379520250006 18.9936579020475
96.02613028 170.146322811355 18.4470226763755
96.05213028 156.558981548544 17.6951395331342
96.07813028 161.723397336985 17.9846266203658
96.10413028 159.023294864512 17.8338607634192
96.13013028 169.36985939186 18.4048830146709
96.15613028 150.450892147413 17.3465208123942
96.18213028 161.099701538398 17.9499137345224
96.20813028 150.76800122718 17.3647920360239
96.23413028 162.731785199638 18.0406089254015
96.26013028 162.455778264577 18.0253032298809
96.28613028 155.61644095262 17.6417936136109
96.31213028 180.946256649958 19.0234726929632
96.33813028 157.874560538556 17.769330912477
96.36413028 165.416941916385 18.1888395405746
96.39013028 141.556694359243 16.8259736335966
96.41613028 163.529637476902 18.0847802019766
96.44213028 147.577326117396 17.1800655480354
96.46813028 160.605234114365 17.9223455002053
96.49413028 153.344664259964 17.5125477449721
96.52013028 152.674311612627 17.4742273999526
96.54613028 150.70944608971 17.3614196475812
96.57213028 173.915178568187 18.6502106458982
96.59813028 165.079009633517 18.1702509412235
96.62413028 158.973606202267 17.8310743480177
96.65013028 164.926140787681 18.161835853662
96.67613028 142.418028969264 16.8770867728565
96.70213028 160.886350392418 17.9380238818225
96.72813028 171.758209070742 18.5341959130005
96.75413028 172.666666666667 18.5831464863551
96.78013028 154.880473561785 17.600026906899
96.80613028 148.562858974242 17.2373350013418
96.83213028 156.694650700812 17.7028049020946
96.85813028 155.707885926668 17.6469762807495
96.88413028 164.395951839033 18.1326198790485
96.91013028 158.162816871535 17.7855456408588
96.93613028 183.219495458806 19.1425962428719
96.96213028 169.536749165971 18.4139484720671
96.98813028 146.974890202605 17.1449637038172
97.01413028 144.800024058691 17.0176393226964
97.04013028 169.562659702461 18.4153555329492
97.06613028 173.919561501743 18.6504456516054
97.09213028 162.036448550785 18.0020248056037
97.11813028 158.666666666667 17.8138522878499
97.14413028 171.173292651696 18.502610229462
97.17013028 174.346032977973 18.6732982077604
97.19613028 155.492657993562 17.6347757566441
97.22213028 163.07928029381 18.0598604808459
97.24813028 157.295332446259 17.7367038903095
97.27413028 163.412053474971 18.07827721189
97.30013028 161.09136196388 17.949449126025
97.32613028 165.263376117663 18.180394721659
97.35213028 165.98258979287 18.2199116239827
97.37813028 164.666666666667 18.1475434517549
97.40413028 151.209057578761 17.3901729478899
97.43013028 148.275015604697 17.2206280724425
97.45613028 154.454646955404 17.5758155973146
97.48213028 158.738025851804 17.8178576631313
97.50813028 160.407656975306 17.9113180405746
97.53413028 167.083340484035 18.2802265020997
97.56013028 160.289370281131 17.9047128031215
97.58613028 161.974164030013 17.9985646111024
97.61213028 162.186308683491 18.0103475082238
97.63813028 160.329994666941 17.9069815807657
97.66413028 164.138537886586 18.1184181366137
97.69013028 162.803862730523 18.0446037767817
97.71613028 167.761428297425 18.317283002532
97.74213028 164.252549845131 18.1247096443022
97.76813028 153.28428318476 17.5090995305161
97.79413028 149.323972355086 17.2814335259021
97.82013028 152.914070122446 17.487942710476
97.84613028 169.924898719306 18.4350155258576
97.87213028 173.17863048608 18.6106759944974
97.89813028 161.791163085882 17.9883942077041
97.92413028 165.130926192081 18.1731079450974
97.95013028 170.15251602914 18.4473584032587
97.97613028 169.532435059648 18.4137141858805
98.00213028 181.663676168304 19.0611477182411
98.02813028 184.000118585943 19.1833322749695
98.05413028 161.162592175045 17.9534170661212
98.08013028 157.931950261645 17.7725603254931
98.10613028 160.422787819889 17.912162785096
98.13213028 161.884775192698 17.9935974831437
98.15813028 169.396576786681 18.4063346045149
98.18413028 167.93210930898 18.3265986647266
98.21013028 179.083777164648 18.9253151712011
98.23613028 172.662075543879 18.582899426294
98.26213028 165.491593187291 18.1929433125754
98.28813028 172.510533484095 18.5747427160699
98.31413028 171.922112141299 18.5430370835686
98.34013028 157.412055799303 17.7432835630445
98.36613028 163.195928463425 18.066318300275
98.39213028 181.150581656543 19.0342103412011
98.41813028 175.382562214588 18.7287245809526
98.44413028 166.938978940548 18.2723276536159
98.47013028 178.817049668254 18.911216231023
98.49613028 165.543524782524 18.1957975797998
98.52213028 187.550967895445 19.3675485230034
98.54813028 183.281812377185 19.1458513718866
98.57413028 177.153867386132 18.8230639050146
98.60013028 185.638193631921 19.2685336043987
98.62613028 161.428037995448 17.9681962364311
98.65213028 171.716094202884 18.5319234944937
98.67813028 175.896749281656 18.7561589501506
98.70413028 173.447226705929 18.6251027758737
98.73013028 179.881956217083 18.9674434870429
98.75613028 170.071322755596 18.4429565284743
98.78213028 164.589391280206 18.1432847786836
98.80813028 182.282097220399 19.0935642152218
98.83413028 178.560044030476 18.8976212275766
98.86013028 172.764209989736 18.5883947660757
98.88613028 178.516198093655 18.8953009022696
98.91213028 162.565757781928 18.0314035938375
98.93813028 162.473162430188 18.0262676353253
98.96413028 177.884947569197 18.8618635118165
98.99013028 164.636056809461 18.1458566515588
99.01613028 164.215954959275 18.1226904713001
99.04213028 170.260702006456 18.4532220496289
99.06813028 180.096887448383 18.9787716909384
99.09413028 185.966796717426 19.2855799351446
99.12013028 180.686382277861 19.0098070625591
99.14613028 164.226982828012 18.1232989727595
99.17213028 180.274312295626 18.9881179844463
99.19813028 176.156163255937 18.7699847232723
99.22413028 220.348247275042 19.7947921977355
99.25013028 235.093121495156 19.6618165403099
99.27613028 180.479272400877 18.9989090424096
99.30213028 189.170935781408 19.4510120961048
99.32813028 237.688062249676 19.8199138892861
99.35413028 231.037504945451 19.6216318353465
99.38013028 252.054309235103 20.5220124981081
99.40613028 253.680077733442 20.946124599305
99.43213028 245.164623282563 20.9776790565166
99.45813028 284.146653522676 21.6218362075443
99.48413028 313.663349787075 21.6939812415486
99.51013028 306.26720710384 22.0639435845278
99.53613028 306.256980916579 22.1606228624063
99.56213028 252.336245242925 21.7447191760169
99.58813028 202.507150866971 20.7909658251174
99.61413028 206.538519842567 20.3242967820571
99.64013028 206.666666666667 20.3306009093025
99.66613028 193.009123569412 19.6473470763567
99.69213028 194.520085907377 19.7241012929551
99.71813028 193.439698021584 19.6692500122188
99.74413028 180.53597385148 19.0018932662764
99.77013028 197.118724228532 19.8554135806098
99.79613028 181.850288526607 19.0709354005831
99.82213028 192.938437003149 19.6437489804339
99.84813028 181.798528691053 19.0682211383785
99.87413028 184.586462399152 19.2138732378015
99.90013028 182.146077575768 19.0864390380064
99.92613028 172.446210804616 18.5712794822875
99.95213028 180.646499338167 19.0077089275992
99.97813028 181.540882215274 19.0547045222577
100.00413028 160.882862829773 17.9378294578677
100.03013028 177.294256635151 18.830520791266
100.05613028 187.072661400242 19.342836472464
100.08213028 168.727478066308 18.3699470911763
100.10813028 163.048870562139 18.0581765725191
100.13413028 176.301343753278 18.7777178460684
100.16013028 178.138432629809 18.8752977528731
100.18613028 178.203602629004 18.8787500978748
100.21213028 178.348398528768 18.8864183226343
100.23813028 175.147614021619 18.716175572035
100.26413028 178.104631294948 18.8735068969679
100.29013028 175.102264890394 18.7137524238403
100.31613028 170 18.4390889145858
100.34213028 174.946252001288 18.7054137618652
100.36813028 165.465779227071 18.1915243576271
100.39413028 158.447924512575 17.8015687237151
100.42013028 164.333459129215 18.1291731267157
100.44613028 170.223019214056 18.4511798654751
100.47213028 179.842752869173 18.9653764987238
100.49813028 178.668552751129 18.9033622803526
100.52413028 171.745667619676 18.5335192351413
100.55013028 167.362433639968 18.2954876207205
100.57613028 174.202821812195 18.6656273300522
100.60213028 178.811036890655 18.9108982806558
100.62813028 163.861264312208 18.1031082586504
100.65413028 161.643552242348 17.9801864418781
100.68013028 166.138484096032 18.2284658759881
100.70613028 170.376115934465 18.4594753952795
100.73213028 163.107172400341 18.0614048401746
100.75813028 162.772224496578 18.0428503566691
100.78413028 183.29475175499 19.1465271918951
100.81013028 174.990971299347 18.707804323295
100.83613028 168.162831908214 18.3391838372494
100.86213028 164.880378693028 18.1593159944436
100.88813028 164.784125726467 18.1540147475134
100.91413028 157.792223243486 17.7646966336882
100.94013028 161.557733123992 17.9754128255232
100.96613028 171.527880366406 18.5217645145599
100.99213028 172.939660856757 18.5978311024031
101.01813028 170.256448663687 18.4529915549586
101.04413028 160.160715624848 17.8975258415709
101.07013028 171.176613103318 18.5027896871428
101.09613028 169.176594034783 18.3943792520858
101.12213028 153.238862901968 17.5065052424502
101.14813028 164.597240383553 18.1437173910725
101.17413028 186.176040238696 19.2964266245694
101.20013028 170.109814113844 18.4450434596313
101.22613028 160.997487260468 17.9442184148805
101.25213028 158.262424394911 17.7911452354766
101.27813028 176.181646409138 18.7713423286209
101.30413028 168.387036222 18.351405189903
101.33013028 160.030652642916 17.8902572727681
101.35613028 179.429259524719 18.943561414091
101.38213028 182.758070562505 19.1184764331526
101.40813028 173.76362844471 18.6420829546867
101.43413028 167.861689987985 18.3227557964398
101.46013028 170.622706792554 18.4728290628455
101.48613028 158.168668277458 17.785874635646
101.51213028 154.501667008863 17.578490663812
101.53813028 168.362754912719 18.3500820114091
101.56413028 180.52763427706 19.001454379971
101.59013028 168.6308763149 18.3646876540223
101.61613028 168.495983330779 18.3573409474672
101.64213028 179.761985271502 18.9611173337175
101.66813028 191.808650800753 19.5861507602057
101.69413028 183.860036426759 19.1760285996219
101.72013028 174.092345467494 18.6597076862149
101.74613028 196.534106835642 19.8259479892207
101.77213028 183.54360693894 19.1595201891352
101.79813028 192.426867078646 19.6176893174832
101.82413028 188.166203826058 19.3992888439787
101.85013028 180.364299185321 18.9928565089783
101.87613028 176.851532302489 18.8069950977018
101.90213028 192.866712288868 19.6400973668089
101.92813028 182.287187494869 19.0938308097076
101.95413028 177.064390652962 18.8183097356252
101.98013028 192.350753074724 19.613809067834
102.00613028 181.470996151175 19.0510365151702
102.03213028 192.980096121857 19.6458695975443
102.05813028 203.417509278485 20.1701516741191
102.08413028 225.004658981848 20.2425104239705
102.11013028 169.334523081736 18.4029629723985
102.13613028 175.525078134987 18.7363325191984
102.16213028 186.910880969125 19.3344708212625
102.18813028 179.86162348508 18.9663714761195
102.21413028 188.874006742561 19.4357406209571
102.24013028 203.686299267692 20.1834734011613
102.26613028 200.831489916119 20.0415313744294
102.29213028 190.951641301894 19.5423458828204
102.31813028 179.356330642277 18.9397112249515
102.34413028 175.645414609621 18.7427540457437
102.37013028 159.708987162474 17.8722683038541
102.39613028 168.593763208929 18.36266664779
102.42213028 184.621306530605 19.2156866403782
102.44813028 165.426670748001 18.1893744118923
102.47413028 150.458494307736 17.346959059601
102.50013028 160.244358313111 17.9021986534119
102.52613028 165.333333333333 18.1842422626478
102.55213028 170.368111815635 18.4590417852951
102.57813028 157.329529383527 17.7386318177884
102.60413028 163.33432233928 18.0739770022693
102.63013028 171.313587648773 18.5101911199627
102.65613028 163.375046242598 18.0762300407246
102.68213028 171.830284277285 18.5380842741252
102.70813028 159.686489005225 17.8710094289733
102.73413028 154.582449643307 17.5830856019816
102.76013028 147.737384160047 17.1893795210908
102.78613028 148.231960872697 17.2181277073146
102.81213028 163.122296271924 18.0622421793045
102.83813028 173.079549246583 18.6053513402237
102.86413028 159.821852775163 17.8785823137722
102.89013028 154.69085078285 17.5892496021206
102.91613028 164.381188847913 18.1318056931963
102.94213028 177.679073641344 18.8509455275508
102.96813028 164.88783916695 18.1597268243192
102.99413028 158.429161477869 17.800514682327
103.02013028 172.031837742651 18.5489534876042
103.04613028 170.347727617401 18.4579374588496
103.07213028 164.388797364333 18.1322253109944
103.09813028 161.043614884163 17.9467888428077
103.12413028 163.12180176891 18.0622148015635
103.15013028 168.194493242518 18.3409101869301
103.17613028 164.618891837916 18.1449106824981
103.20213028 159.46167795864 17.8584253482013
103.22813028 170.762117423571 18.4803743156664
103.25413028 179.984062913901 18.9728259842281
103.28013028 172.608423267684 18.5800120165561
103.30613028 177.440579446511 18.8382897019082
103.33213028 186.259224853479 19.3007370249677
103.35813028 169.480122898675 18.4108730319165
103.38413028 160.468248564063 17.914700587175
103.41013028 169.554249593197 18.4148988372566
103.43613028 162.603188982569 18.0334793638149
103.46213028 155.476260509654 17.6338458941692
103.48813028 153.034257937755 17.4948139708746
103.51413028 171.1109740258 18.4992418236965
103.54013028 178.698521770332 18.9049475942322
103.56613028 174.928428830729 18.7044609027221
103.59213028 177.733066021887 18.853809483597
103.61813028 165.678480237717 18.2032129162803
103.64413028 164.603511725899 18.1440630359299
103.67013028 153.985165857224 17.5490835006974
103.69613028 168.833050932916 18.375693234973
103.72213028 179.173294976026 18.9300446368215
103.74813028 178.513243171081 18.895144517631
103.77413028 174.623401421112 18.6881460515008
103.80013028 163.227441755241 18.0680625278551
103.82613028 170.542910839821 18.4685089186876
103.85213028 187.651375920986 19.3727321728757
103.87813028 172.481396747922 18.573174028578
103.90413028 172.619448811998 18.5806054159706
103.93013028 164.166339156207 18.1199524920021
103.95613028 174.311605841801 18.6714544608502
103.98213028 186.300546192274 19.3028778264939
104.00813028 176.334455108244 18.7794810955065
104.03413028 153.935840399614 17.5462725614082
104.06013028 169.999219183187 18.4390465688
104.08613028 185.527987947518 19.2628132912884
104.11213028 182.488826531654 19.1043883195278
104.13813028 193.295392592992 19.6619120429826
104.16413028 185.571261873577 19.2650596611366
104.19013028 187.396570430513 19.3595749142647
104.21613028 167.072388415618 18.2796273712359
104.24213028 150.721269195026 17.3621006329894
104.26813028 167.375585855662 18.2962064841684
104.29413028 168.63764386778 18.3650561593359
104.32013028 167.586022540455 18.3077045279005
104.34613028 188.658976610658 19.424673825352
104.37213028 184.698665780985 19.2197120572076
104.39813028 181.393073570538 19.0469458743672
104.42413028 182.629540848343 19.1117524496496
104.45013028 173.044333229909 18.6034584542718
104.47613028 202.505746267615 20.1248973298059
104.50213028 178.869633106336 18.913996569014
104.52813028 181.063199197058 19.029618976588
104.55413028 193.633922311327 19.6791220490817
104.58013028 193.44983749231 19.6697655040577
104.60613028 187.917135804214 19.3864455640643
104.63213028 185.547778742123 19.263840673247
104.65813028 202.990433393798 20.1489668913221
104.68413028 233.094471576644 19.965428049789
104.71013028 195.223805533274 19.7597472419702
104.73613028 234.808710754137 20.4514802464365
104.76213028 221.005663300117 20.2797362752001
104.78813028 203.111709732569 20.154984978043
104.81413028 229.175879866669 19.9557127802843
104.84013028 230.259557685211 20.8782949117682
104.86613028 206.454528986278 20.3201638274045
104.89213028 204.116144986102 20.2047590921596
104.91813028 229.822678069495 20.4993755388313
104.94413028 231.865978595104 21.0252419136655
104.97013028 242.481583085441 21.3037395009329
104.99613028 258.089958809837 21.3534981766819
105.02213028 256.990829437319 21.6436734320099
105.04813028 230.096924038928 21.4071474696868
105.07413028 252.355752951391 21.4649844263012
105.10013028 250.973687891009 21.8409320338897
105.12613028 237.132608355057 21.4448181908017
105.15213028 287.926001070029 22.3656816467977
105.17813028 333.43680811767 23.594167548282
105.20413028 345.80493953982 23.9633466279867
105.23013028 374.2960084593 24.4311638986274
105.25613028 390.384227458018 24.6889373239081
105.28213028 416.550508558939 25.3413663754496
105.30813028 482.822979664977 26.6936965709757
105.33413028 554.092967034571 28.1405239818898
105.36013028 631.926537550327 29.7268337680602
105.38613028 787.817625722867 32.3017764247423
105.41213028 1016.44220342384 35.4013954542776
105.43813028 1257.98133158277 38.7509227749738
105.46413028 1582.04100450475 42.7990852242735
105.49013028 2003.23957486977 47.3635570342549
105.51613028 2367.91026240601 51.350639572974
105.54213028 2370.5345727302 51.8283102235527
105.56813028 2074.79171147464 49.1319275053032
105.59413028 1734.34108002682 45.7819267224229
105.62013028 1373.54927232793 41.8982616872564
105.64613028 1044.93323143266 38.0658878932053
105.67213028 813.2997382225 35.6085312718248
105.69813028 640.222956065983 34.1073935151102
105.72413028 526.897040284559 33.5298820661645
105.75013028 430.244475163601 33.9265106993802
105.77613028 345.944780748267 35.5448082943524
105.80213028 303.50935357005 38.1319228726005
105.82813028 264.493554928752 41.2417802745127
105.85413028 231.405833606148 45.1975365644828
105.88013028 186.97244574539 48.8055297047484
105.90613028 221.422969493384 50.740712502608
105.93213028 279.825583821476 49.7150778492281
105.95813028 254.836456862118 46.1586620975574
105.98413028 215.631509557166 41.7697735348486
106.01013028 195.826577380398 37.2300576326666
106.03613028 181.757552932692 33.1443071649929
106.06213028 222.022341231358 30.6680904754693
106.08813028 201.11076431737 27.9160176101799
106.11413028 180.787142045845 25.6041635066815
106.14013028 207.947310352694 24.3622510302063
106.16613028 162.496919355374 22.030792994779
106.19213028 175.67455092279 21.40853682709
106.21813028 191.78385923245 20.9467403523799
106.24413028 203.817128029752 20.1899543352506
106.27013028 193.4175266395 19.6681227695731
106.29613028 190.343667427177 19.5112104917751
106.32213028 189.681144814658 19.4772248954854
106.34813028 180.54296292286 19.0022610719283
106.37413028 168.39725723231 18.3519621420877
106.40013028 171.418502933182 18.5158582265679
106.42613028 170.02713035825 18.4405602061461
106.45213028 177.952448397155 18.8654418658644
106.47813028 196.320620976339 19.815177060846
106.50413028 182.263099954951 19.0925692328168
106.53013028 177.333333333333 18.8325958557674
106.55613028 181.032311706564 19.0279957802478
106.58213028 195.415944229833 19.7694685932543
106.60813028 165.148422587461 18.1740706825665
106.63413028 167.862823004673 18.3228176329228
106.66013028 189.246461030371 19.4548945528045
106.68613028 154.435664726638 17.574735544334
106.71213028 158.725955186571 17.8171802026342
106.73813028 166.342811426956 18.2396716761545
106.76413028 175.347511601426 18.7268529978438
106.79013028 160.369210727111 17.9091714340508
106.81613028 165.175187416663 18.1755433160422
106.84213028 163.786001659849 18.0989503375113
106.86813028 184.570437417296 19.2130391878691
106.89413028 166.118151363936 18.2273504033875
106.92013028 170.013077032283 18.4397981025977
106.94613028 170.459877208683 18.464012413811
106.97213028 149.338219450414 17.2822579225294
106.99813028 159.891719153921 17.8824897122253
107.02413028 166.532842520656 18.2500872611972
107.05013028 177.660046302522 18.8499361432617
107.07613028 165.198909427526 18.1768484302162
107.10213028 158.965709664544 17.8306314899133
107.12813028 156.786192251122 17.7079751666373
107.15413028 158.527296497047 17.8060268727781
107.18013028 153.144310931011 17.5011034469836
107.20613028 151.45270622663 17.4041780171676
107.23213028 166.942832649061 18.272538556482
107.25813028 172.229169646123 18.559588877242
107.28413028 145.658427463324 17.0680067648993
107.31013028 168.123434791036 18.3370354632932
107.33613028 182.904212316847 19.1261189119407
107.36213028 182.397502467899 19.0996074550185
107.38813028 166.861742924781 18.2681002255177
107.41413028 171.202797241249 18.5042047784415
107.44013028 165.002416163263 18.1660351295082
107.46613028 164.414996538949 18.1336701491424
107.49213028 194.582804167532 19.7272808145234
107.51813028 162.957460926935 18.0531139101782
107.54413028 172.464173337161 18.5722466781572
107.57013028 163.597579634133 18.0885366812317
107.59613028 144.100614507253 16.9764904799109
107.62213028 161.383600362521 17.965722939115
107.64813028 166.688556383535 18.2586174933118
107.67413028 163.560436454804 18.0864831548205
107.70013028 168.442240834484 18.3544131387786
107.72613028 171.616032637861 18.5265232916411
107.75213028 157.021820035973 17.7212764797558
107.77813028 170.047703677179 18.4416758282527
107.80413028 174.573121062761 18.6854553630765
107.83013028 161.012854660134 17.9450747928302
107.85613028 175.647332474949 18.7428563711591
107.88213028 172.080197911332 18.5515604686685
107.90813028 154.813950735023 17.5962468006688
107.93413028 151.442153792476 17.4035716904592
107.96013028 161.38480049893 17.9657897404445
107.98613028 167.892269771827 18.3244246715594
108.01213028 169.068586173332 18.388506528445
108.03813028 176.448816942332 18.7855698312472
108.06413028 173.559537668861 18.6311318855759
108.09013028 175.641498430049 18.7425451009221
108.11613028 165.188550762737 18.1762785389494
108.14213028 157.830499439509 17.7668511244682
108.16813028 172.866910090182 18.5939189032426
108.19413028 182.355615474618 19.0974142477257
108.22013028 179.525661150593 18.9486496168246
108.24613028 174.612352159611 18.6875547977584
108.27213028 160.243143756824 17.9021308093101
108.29813028 159.191304942958 17.8432791236901
108.32413028 168.086337338563 18.3350122628027
108.35013028 167.228891158995 18.2881869609316
108.37613028 176.138185069887 18.7690268831331
108.40213028 174.313709412816 18.671567122918
108.42813028 175.398180589186 18.7295584886129
108.45413028 182.649327611106 19.1127877407303
108.48013028 163.130625458427 18.062703311433
108.50613028 164.706908162404 18.1497607787212
108.53213028 180.779310760958 19.0146948837449
108.55813028 178.526014821047 18.8958204278643
108.58413028 184.204791760576 19.1939986329361
108.61013028 178.512004897621 18.8950789835672
108.63613028 164.753861712959 18.1523476009556
108.66213028 176.451780545412 18.7857275901367
108.68813028 171.839464815344 18.5385794933347
108.71413028 173.770105651955 18.6424304022815
108.74013028 172.400293694473 18.5688068380536
108.76613028 175.789911483245 18.7504619400827
108.79213028 173.909017748096 18.6498803078248
108.81813028 172.438395806481 18.5708586665496
108.84413028 177.427642393034 18.8376029469269
108.87013028 174.926235656435 18.7043436482778
108.89613028 162.448262292585 18.0248862572048
108.92213028 165.111980392855 18.1720653968037
108.94813028 177.8708016988 18.8611135248585
108.97413028 171.804842202293 18.5367118013035
109.00013028 172.731114288272 18.5866142311219
109.02613028 172.10606566211 18.5529547868855
109.05213028 176.372058068475 18.7814833316474
109.07813028 173.320217547177 18.6182822809827
109.10413028 175.131332799334 18.7153056506878
109.13013028 172.508137859931 18.5746137434904
109.15613028 179.10865590939 18.9266297004717
109.18213028 183.102905728399 19.136504682329
109.20813028 175.15484600415 18.7165619708402
109.23413028 176.998768936469 18.8148222918246
109.26013028 172.017164971543 18.5481624411446
109.28613028 183.511489238675 19.1578437846577
109.31213028 198.362942325913 19.9179789298971
109.33813028 185.376843814475 19.2549652720785
109.36413028 192.405626880194 19.6166065811696
109.39013028 195.691361793128 19.7833951481098
109.41613028 184.983773422022 19.2345404635527
109.44213028 199.619219466854 19.9809519025923
109.46813028 215.490769584765 20.7600948738085
109.49413028 241.421970893111 20.3721803472545
109.52013028 246.404591089035 20.5020886633222
109.54613028 207.647685291662 20.3787970838154
109.57213028 245.761793066137 20.726543857937
109.59813028 196.734910174383 19.8360737130301
109.62413028 193.374342933534 19.6659270279097
109.65013028 257.54249001685 20.7367485636635
109.67613028 192.576368655292 19.625308591474
109.70213028 206.021597046994 20.2988471124344
109.72813028 206.666666666667 20.3306009093025
109.75413028 216.672913675012 20.8169600890722
109.78013028 221.045986791136 21.0259832964423
109.80613028 196.234744035478 19.8108426895717
109.83213028 219.432925820042 20.9491253192128
109.85813028 213.016035132945 20.6405443306588
109.88413028 228.584851623644 21.3815271495581
109.91013028 219.538342580467 20.9541567513688
109.93613028 227.265382495583 21.319727132193
109.96213028 219.507121958622 20.9526667495392
109.98813028 202.721869571645 20.13563356697
110.01413028 223.488156474042 21.1418143248891
110.04013028 210.868564268218 20.536239396161
110.06613028 205.695297041228 20.2827659376737
110.09213028 221.515250402757 21.0482897358791
110.11813028 204.554820750207 20.226458946153
110.14413028 208.278181040828 20.4097124448547
110.17013028 202.873376909401 20.1431565008765
110.19613028 211.951298019459 20.5888949688641
110.22213028 213.814364552206 20.6791858907553
110.24813028 219.829538182511 20.9680489403526
110.27413028 211.151949520795 20.5500340399132
110.30013028 215.116986803398 20.7420821907251
110.32613028 219.439590440475 20.9494434503867
110.35213028 225.205734802809 21.2228996512168
110.37813028 205.401546767681 20.268278011103
110.40413028 208.880529059856 20.439203950245
110.43013028 197.890717435525 19.8942563286756
110.45613028 219.488085322494 20.9517581755085
110.48213028 246.765054985122 22.2155375800417
110.50813028 226.019088102247 21.2611894353184
110.53413028 227.557227616135 21.333411711029
110.56013028 234.144688318656 21.639994839124
110.58613028 215.70435728583 20.7703807035803
110.61213028 210.218533348047 20.5045620947167
110.63813028 229.352738913546 21.4174106237681
110.66413028 221.881967221927 21.0657051731922
110.69013028 228.308848720423 21.3686147759008
110.71613028 237.051672793551 21.7739143377368
110.74213028 219.868408398973 20.9699026415943
110.76813028 224.764588231133 21.2021031141315
110.79413028 225.78786231961 21.2503111657034
110.82013028 238.667590877316 21.848001779445
110.84613028 241.28835437982 21.9676286558117
110.87213028 246.131367758296 22.1869947382829
110.89813028 258.310259987223 22.7292877137504
110.92413028 260.826038144457 22.8397039448613
110.95013028 289.501487687824 23.006849290917
110.97613028 264.288432741324 22.9907995833692
111.00213028 257.284822797823 22.6841276137225
111.02813028 246.097244913735 22.185456718929
111.05413028 239.259130838584 21.8750602668237
111.08013028 247.359025292578 22.2422582168528
111.10613028 232.622988457685 21.5695613519462
111.13213028 228.549605533611 21.3798786494971
111.15813028 241.133601157044 21.9605829229118
111.18413028 241.402845804696 21.9728398621888
111.21013028 219.765830299391 20.9650103887115
111.23613028 231.476806478893 21.5163568700137
111.26213028 229.356294212741 21.4175766235464
111.28813028 224.032536403042 21.1675476332542
111.31413028 247.083460777493 22.2298655316443
111.34013028 254.897685967712 22.5786485852326
111.36613028 245.270754435173 22.1481716823386
111.39213028 242.030438097528 22.0013835063856
111.41813028 226 21.2602916254693
111.44413028 229.322215244593 21.4159853961751
111.47013028 239.787857670941 21.8992172312593
111.49613028 239.987574810563 21.9083351631548
111.52213028 228.038336342757 21.3559516923389
111.54813028 245.247107607724 22.1471039916159
111.57413028 257.633813022705 22.6995071762673
111.60013028 244.958969860694 22.1340899908126
111.62613028 249.298332478878 22.3292782005544
111.65213028 231.664205393355 21.5250647103954
111.67813028 236.692240039963 21.7574005818693
111.70413028 243.034206471537 22.0469592675061
111.73013028 246.229384808344 22.1914120690119
111.75613028 247.367729779328 22.2426495624657
111.78213028 272.279338391522 23.3357810407761
111.80813028 249.529127937188 22.3396118111836
111.83413028 232.129920678793 21.5466898004679
111.86013028 255.085505909291 22.5869655292291
111.88613028 265.190529391625 23.030003447313
111.91213028 228.728303376226 21.3882352416569
111.93813028 245.224603094285 22.1460878303273
111.96413028 250.378763150387 22.3776121670918
111.99013028 253.83046300997 22.5313320959933
112.01613028 250.902255697637 22.4009935358964
112.04213028 239.757159301146 21.8978153842408
112.06813028 275.620028032687 23.4785019978996
112.09413028 314.552345279328 23.6663320981515
112.12013028 281.132793208014 23.7121400640269
112.14613028 258.241783956263 22.7262748358046
112.17213028 315.77888389671 23.7410876566221
112.19813028 280.699007592844 23.6938391820677
112.22413028 286.639473837354 23.9432443013621
112.25013028 284.695575528268 23.8619184278326
112.27613028 274.910433900488 23.4482593767848
112.30213028 284.323676507033 23.8463278727368
112.32813028 327.484912617055 23.8045750313685
112.35413028 353.403799476582 24.4815764291398
112.38013028 293.708423832226 24.236683924672
112.40613028 379.306036211278 25.0636717448899
112.43213028 352.167372054053 24.5670214008373
112.45813028 434.122895531392 25.8478857716544
112.48413028 422.348657812537 26.3412006619959
112.51013028 482.391908552385 28.0682780269193
112.53613028 475.931692768632 27.8164320338619
112.56213028 577.86791921586 29.1220272819471
112.58813028 591.912771406229 29.7957027365181
112.61413028 694.052385630654 31.3525125982992
112.64013028 887.670751352873 34.2891811574302
112.66613028 1077.22580041795 37.08865443884
112.69213028 1336.44315770437 40.2665784166372
112.71813028 1733.18656559343 44.8906632402518
112.74413028 1999.66657500702 48.0588841113377
112.77013028 2209.40920020611 50.4981492175095
112.79613028 2225.65047346645 50.534547526765
112.82213028 1964.83732779446 48.124110172032
112.84813028 1584.9009440842 44.1047932095535
112.87413028 1272.34899599535 40.8536196078304
112.90013028 964.169436462916 37.2567151283791
112.92613028 790.102452337844 35.2525644436435
112.95213028 678.504328616596 33.9617759374135
112.97813028 536.415414642006 32.6200809913633
113.00413028 504.346828672766 32.9402412065941
113.03013028 512.196215221977 33.9607260491316
113.05613028 426.318835137626 34.8651725783595
113.08213028 392.661460232576 37.0175287124559
113.10813028 403.588783617655 40.0354344781256
113.13413028 360.641534619577 43.39522143123
113.16013028 376.566117247977 47.1775112328746
113.18613028 359.979673172789 49.4368722651991
113.21213028 347.656248147985 50.4644380647883
113.23813028 392.118222862144 49.7855193627978
113.26413028 349.99271402446 46.1047741577059
113.29013028 354.099796998576 42.2632660978297
113.31613028 350.023866629105 38.4264745490456
113.34213028 333.324979452026 34.8506038273644
113.36813028 356.045811408487 33.0526993615756
113.39413028 376.146290497725 31.4670272636541
113.42013028 384.575995796753 30.0591079185312
113.44613028 360.174894976961 29.3852938761439
113.47213028 358.346340887863 28.8590650799845
113.49813028 356.86061992391 27.6915556711039
113.52413028 340.735037200448 27.0968226656378
113.55013028 349.018968662668 26.4204075919607
113.57613028 351.500018333244 26.5141478585771
113.60213028 369.059218795398 27.1427989709189
113.62813028 374.192249402037 26.9629566599338
113.65413028 376.6789241879 27.1333845907894
113.68013028 371.582728130708 27.3279246676621
113.70613028 383.937078850474 27.0614998074048
113.73213028 380.984280233845 27.0350766275008
113.75813028 427.070798345829 27.7344368097696
113.78413028 452.410338199311 28.0992671203165
113.81013028 402.59472690806 27.5926592004096
113.83613028 397.308129528757 27.7963180765245
113.86213028 402.885819924784 27.888706892701
113.88813028 433.625556183116 28.1128143408107
113.91413028 425.288752432026 27.9334691237078
113.94013028 468.635393785565 28.6118827378288
113.96613028 467.535616821895 28.3411619094628
113.99213028 461.045049572289 28.1554343923143
114.01813028 479.639429639628 28.7643892214387
114.04413028 511.26924147123 29.636216895191
114.07013028 529.48499803814 30.0173266692209
114.09613028 580.800300758933 30.8764295714322
114.12213028 546.518956633489 30.2859155529194
114.14813028 604.167160388112 31.3746922491292
114.17413028 616.031122813384 31.6454607063067
114.20013028 607.476729640728 32.17042146858
114.22613028 684.744333822809 33.5552623513665
114.25213028 756.645811686321 33.9869672575316
114.27813028 776.903437810997 34.2286705631434
114.30413028 824.13322370924 35.0344655171606
114.33013028 895.410796110379 36.3926427611828
114.35613028 918.845506472325 36.6763934094078
114.38213028 990.908381073182 38.1507612551828
114.40813028 1133.32891222354 39.9541580851263
114.43413028 1173.73247865509 40.4028125077154
114.46013028 1215.17356983533 41.1467057046425
114.48613028 1245.67237850372 41.8781777450317
114.51213028 1298.33167117664 42.7339052121274
114.53813028 1318.9384480505 43.5109067329979
114.56413028 1381.73868952989 43.8845242010479
114.59013028 1355.72551104915 44.2167659658446
114.61613028 1401.5389076411 44.857012966601
114.64213028 1605.15123817125 46.9945049384865
114.66813028 1598.78325446196 47.7288145440483
114.69413028 1688.66556046412 49.4142240918168
114.72013028 1706.30208231051 49.8019359832787
114.74613028 1833.21443569237 51.4795731092129
114.77213028 2057.81408628112 54.2651992330751
114.79813028 2271.45216358559 56.4089543037933
114.82413028 2441.02334180475 58.4923396117293
114.85013028 2735.42514315782 62.077927068692
114.87613028 3235.32193328908 66.3109504546864
114.90213028 3678.36274423951 69.8631508574449
114.92813028 4318.15317061316 74.5065216836987
114.95413028 5273.78340737013 80.9764943480727
114.98013028 6320.6679537012 87.3306088418936
115.00613028 7714.25042252542 95.2813049583865
115.03213028 9454.91698291798 103.930497679912
115.05813028 12325.2990128266 117.08936361888
115.08413028 15616.4113424425 131.089042223984
115.11013028 20214.6474273285 147.649794137895
115.13613028 26855.2789744797 168.871305499202
115.16213028 35538.789249589 192.945340955232
115.18813028 46176.5040084617 219.031826525218
115.21413028 55952.0132618621 240.741691862315
115.24013028 60775.1125713703 250.980739357588
115.26613028 59062.9010664069 247.897346794657
115.29213028 51299.0827683808 232.285777959863
115.31813028 42059.0738037726 212.532569520714
115.34413028 32454.8111254576 189.768631709926
115.37013028 24650.2461848064 169.695741216406
115.39613028 18494.1727333817 153.340438811388
115.42213028 14159.859483688 142.083471101468
115.44813028 10815.2726380353 134.66130002603
115.47413028 8570.56377918937 132.353403418529
115.50013028 6711.3221118904 134.915487535973
115.52613028 5306.17378518427 141.153143742674
115.55213028 4341.40581349074 152.1018336491
115.57813028 3813.53029026898 169.052879669698
115.60413028 2958.10856165118 188.903255990902
115.63013028 2020.7403732987 211.271722494772
115.65613028 1404.10340379547 232.119779083042
115.68213028 1137.7345790123 244.673894097937
115.70813028 901.845161089151 244.95162291593
115.73413028 1286.16553594454 233.907402495139
115.76013028 1539.13986520249 215.353304928769
115.78613028 1696.69003786702 192.93128380409
115.81213028 1503.30093467919 169.506468189115
115.83813028 1403.73104335245 148.304766333767
115.86413028 1313.34508179885 130.296532590515
115.89013028 1157.8828349803 114.734487651383
115.91613028 982.431502204217 101.785929235379
115.94213028 867.402463930178 90.9240642087829
115.96813028 904.855381999689 82.1073797658996
115.99413028 845.426592243471 74.5215115827052
116.02013028 679.861308666683 68.4539200128078
116.04613028 655.968132540275 62.9449021561621
116.07213028 827.945480653996 57.0004504103761
116.09813028 954.893011161848 51.255750592858
116.12413028 964.042147521746 47.0665735584926
116.15013028 959.704869578885 44.3290814951046
116.17613028 801.374738354732 43.486407288764
116.20213028 539.005420415385 44.0502993900492
116.22813028 333.915444302348 44.0100120489177
116.25413028 262.778543794726 43.0232466769176
116.28013028 261.930007090169 41.2875913197304
116.30613028 255.522434054322 40.058975530993
116.33213028 261.00914826445 38.6229302671598
116.35813028 260.898184027246 36.4688482833144
116.38413028 320.327838937265 35.2642517764197
116.41013028 345.848424609646 34.9513686018247
116.43613028 285.497649452088 34.0188021152632
116.46213028 312.02282311379 32.8898228521945
116.48813028 373.982236673466 32.2202152462342
116.51413028 299.461159731476 31.8947758001736
116.54013028 300.293039803248 30.8286181134223
116.56613028 299.583988429823 30.9488470153684
116.59213028 298.874937056397 30.274765558988
116.61813028 298.165885682972 28.9019402040148
116.64413028 234.349554567007 30.6101588822366
116.67013028 344.337701117112 28.4391046276777
116.69613028 435.783303343877 27.2608452393675
116.72213028 426.725959600865 26.208126568264
116.74813028 404.217304444249 25.7251374254007
116.77413028 397.266686174029 25.5372873967801
116.80013028 331.010267590937 25.7297597186968
116.82613028 325.987034580678 25.5337828995501
116.85213028 344.833632207293 25.8714508587098
116.87813028 335.674028723372 25.7339193818484
116.90413028 318.991025089902 25.2583065580376
116.93013028 314.129907966439 25.0651115284349
116.95613028 322.02251319377 25.3780422095074
116.98213028 350.340918055117 24.9377899344817
117.00813028 294.679064107075 24.2766992858203
117.03413028 296.081875189749 24.3344149380974
117.06013028 288.798533576643 24.0332492009151
117.08613028 297.946707513508 24.4109281885596
117.11213028 257.186974092436 22.6798136717406
117.13813028 263.390170114189 22.9516958028895
117.16413028 283.847750599305 23.8263614762852
117.19013028 287.331266808681 23.972119923306
117.21613028 278.561444292422 23.6034507770547
117.24213028 251.846825771846 22.4431203611194
117.26813028 266.038764342866 23.0668057755237
117.29413028 276.141610778287 23.5007068309992
117.32013028 288.261078540344 24.0108758082809
117.34613028 281.237533791588 23.71655682394
117.37213028 294.214142350805 24.25754078017
117.39813028 279.958136723909 23.662550019975
117.42413028 277.860548290788 23.5737374334571
117.45013028 265.330434525647 23.0360775535093
117.47613028 262.690227305865 22.921179171494
117.50213028 271.170768053564 23.2882274144497
117.52813028 257.734850881404 22.7039578435745
117.55413028 254.769605646517 22.5729752423785
117.58013028 260.375520206513 22.8199702106078
117.60613028 247.48492050317 22.2479176779837
117.63213028 247.287754003208 22.2390536670609
117.65813028 246.104388383694 22.1857787054543
117.68413028 257.549294648735 22.6957835136281
117.71013028 252.052996401513 22.4523048438913
117.73613028 253.117217002303 22.4996540863322
117.76213028 253.333333333333 22.5092573548455
117.78813028 266.705491156259 23.0956918561128
117.81413028 261.194483708253 22.8558300531069
117.84013028 246.363957373467 22.1974754138153
117.86613028 251.300196553664 22.4187509265643
117.89213028 229.914179174139 21.4436087995533
117.91813028 234.654838912689 21.6635564445309
117.94413028 241.000338633771 21.9545138244403
117.97013028 244.675470670834 22.1212780223401
117.99613028 224.194162435504 21.1751818143554
118.02213028 237.453785452765 21.7923741456852
118.04813028 229.785427941571 21.4376037812798
118.07413028 233.62952030924 21.6161754392048
118.10013028 227.465662965454 21.329119201948
118.12613028 222.189641847463 21.0803055882719
118.15213028 232.575505682085 21.567359860775
118.17813028 231.362739022283 21.5110547868896
118.20413028 227.431091818623 21.327498297673
118.23013028 221.039320463188 21.0256662421521
118.25613028 209.420053561958 20.4655834787068
118.28213028 231.309133563647 21.5085626467064
118.30813028 220.878286743658 21.0180059350861
118.33413028 222.832096032099 21.1107601015264
118.36013028 230.640946958387 21.4774741046701
118.38613028 239.489203919173 21.8855753371563
118.41213028 235.96981178673 21.7241714128171
118.43813028 213.860215159446 20.6814030065393
118.46413028 221.347450837866 21.0403161020868
118.49013028 230.652682167939 21.4780204938881
118.51613028 214.674597926418 20.7207431298406
118.54213028 204.666666666667 20.2319878739914
118.56813028 220.75066387913 21.0119329848127
118.59413028 217.236831099352 20.8440318124567
118.62013028 218.643346614393 20.9114010345741
118.64613028 224.249825121462 21.1778103269182
118.67213028 213.226635513733 20.6507450477571
118.69813028 210.832113393108 20.5344643657003
118.72413028 210.567368557437 20.521567608613
118.75013028 213.056354136432 20.6424976268102
118.77613028 219.986800349923 20.975547685337
118.80213028 222.303589010613 21.0857102802165
118.82813028 210.661185438448 20.5261387230257
118.85413028 208.453842421405 20.4183173852012
118.88013028 207.428449251367 20.3680361965196
118.90613028 198.314855141854 19.9155645233498
118.93213028 201.408060404468 20.0702795398803
118.95813028 205.33528127204 20.2650083282509
118.98413028 219.73084448174 20.9633415505133
119.01013028 216.289664658616 20.7985415189919
119.03613028 213.388970594592 20.6586045315066
119.06213028 218.196830427463 20.8900373588686
119.08813028 222.62474153631 21.1009355970919
119.11413028 202.589085897783 20.1290380245944
119.14013028 216.611678923911 20.8140183013233
119.16613028 216.717123433372 20.8190837182318
119.19213028 201.498326634959 20.0747765434617
119.21813028 196.499574442687 19.8242061350606
119.24413028 209.080246199472 20.4489728934962
119.27013028 203.376843814472 20.1681354524642
119.29613028 211.559251355075 20.5698444989297
119.32213028 218.088786753281 20.884864699264
119.34813028 216.654449666447 20.816073100681
119.37413028 218.395560885377 20.8995483628416
119.40013028 195.393968324629 19.7683569537091
119.42613028 187.62256131133 19.3712447360168
119.45213028 201.669559971932 20.083304507572
119.47813028 208.758986709461 20.4332565544243
119.50413028 202.606711267244 20.1299136246157
119.53013028 213.796631601746 20.6783283464474
119.55613028 216.587452022013 20.8128542983423
119.58213028 199.25016375523 19.9624729808323
119.60813028 194.342990159634 19.7151206011849
119.63413028 192.142072883613 19.6031667280373
119.66013028 214.91795219681 20.732484279353
119.68613028 194.978323974697 19.7473200194202
119.71213028 215.724304803431 20.7713410642371
119.73813028 215.364536594162 20.7540134236326
119.76413028 221.991931702591 21.0709245977765
119.79013028 201.423569490454 20.0710522639175
119.81613028 196.993861426419 19.8491239820008
119.84213028 197.999980931481 19.8997477839032
119.86813028 176.654613362451 18.7965216655875
119.89413028 170.262469504969 18.4533178320306
119.92013028 191.961020494912 19.5939286767566
119.94613028 191.948261557294 19.5932774980244
119.97213028 204.283247598097 20.2130278581957
119.99813028 211.314198413409 20.5579278339724
120.02413028 210.804387306903 20.533114099274
120.05013028 217.870085677392 20.874390322948
120.07613028 203.348945968583 20.1667521415117
120.10213028 194.102543377437 19.7029207671064
120.12813028 190.736363610071 19.5313268166846
120.15413028 182.913317671491 19.1265949751382
120.18013028 210.804559066596 20.5331224642818
120.20613028 185.418926901446 19.2571507187043
120.23213028 190.888946142117 19.5391374498527
120.25813028 195.670904118996 19.7823610380054
120.28413028 184.352275954467 19.2016809657106
120.31013028 194.248951760226 19.7103501622993
120.33613028 190.534866259594 19.5210074668084
120.36213028 188.220419432511 19.4020833640365
120.38813028 199.731573215509 19.9865741544422
120.41413028 193.793803945627 19.6872448019334
120.44013028 189.799921980001 19.483322200282
120.46613028 197.267610391902 19.8629106825713
120.49213028 191.38511688608 19.5645146572094
120.51813028 206.051626212933 20.300326411806
120.54413028 195.661096072005 19.781865234199
120.57013028 202.391609983768 20.1192251333777
120.59613028 201.998367831633 20.0996700386665
120.62213028 182.886761648339 19.1252064903017
120.64813028 188.408600871288 19.4117799735773
120.67413028 206.233973606799 20.3093069112069
120.70013028 179.220246819072 18.932524756042
120.72613028 188.856166210986 19.4348226753416
120.75213028 194.839362736653 19.7402817982243
120.77813028 191.74253225691 19.5827746888387
120.80413028 190.666666666667 19.5277580211691
120.83013028 204.416321000664 20.2196103325788
120.85613028 188.026975959588 19.392110558657
120.88213028 197.102518189676 19.8545973613003
120.90813028 193.522016248127 19.6734346898617
120.93413028 189.342999693899 19.4598560988461
120.96013028 187.353689782527 19.3573598294048
120.98613028 188.172184205955 19.399597119835
121.01213028 191.472443230683 19.5689776549866
121.03813028 198.563566315149 19.9280488917078
121.06413028 198.683261951776 19.9340543769589
121.09013028 197.074644060973 19.8531933985933
121.11613028 181.680194562491 19.0620142987299
121.14213028 176.070305383708 18.7654099546857
121.16813028 187.095989516209 19.34404246874
121.19413028 203.3491691945 20.1667632105155
121.22013028 191.838372876856 19.587668206137
121.24613028 193.97621319363 19.6965079744421
121.27213028 198.596492581261 19.9297010806113
121.29813028 189.246432664514 19.4548930947726
121.32413028 196.362647331606 19.8172978648254
121.35013028 199.214397120659 19.9606812068456
121.37613028 191.649741428292 19.5780357251841
121.40213028 187.023671398397 19.3403035859522
121.42813028 192.416985555853 19.6171856062919
121.45413028 193.692613395761 19.6821042267213
121.48013028 187.284175603648 19.3537683981001
121.50613028 187.69786039323 19.3751315037204
121.53213028 195.903550939741 19.794117860604
121.55813028 201.466288766767 20.0731805535031
121.58413028 195.513551731486 19.7744052619282
121.61013028 188.671942029988 19.425341285547
121.63613028 176.52613743884 18.789685332056
121.66213028 180.057441189317 18.9766931360191
121.68813028 187.845004482778 19.3827244980048
121.71413028 192.155756648684 19.6038647541083
121.74013028 190.236612759036 19.5057228914509
121.76613028 181.386486457854 19.0466000355892
121.79213028 191.146880639191 19.5523339087277
121.81813028 191.996765736631 19.5957528937589
121.84413028 185.226551649811 19.2471583175185
121.87013028 179.600108264119 18.9525780971412
121.89613028 190.667083661942 19.5277793751334
121.92213028 197.01469331021 19.8501734657514
121.94813028 184.20073621901 19.193787339606
121.97413028 177.450783712532 18.8388313710024
122.00013028 177.588115106625 18.8461197654385
122.02613028 185.906374564011 19.2824466582439
122.05213028 189.824867844467 19.4846025283795
122.07813028 171.678271431671 18.5298824298305
122.10413028 183.500066384443 19.1572475259074
122.13013028 174.022082869492 18.6559418346806
122.15613028 197.777984828663 19.8885889307745
122.18213028 201.673143020156 20.0834829160759
122.20813028 185.133029763098 19.2422987069164
122.23413028 165.965125795187 18.2189530871116
122.26013028 168.071788892764 18.3342187667085
122.28613028 192.94837696516 19.6442549853722
122.31213028 183.786076843257 19.1721713346849
122.33813028 201.929118573693 20.0962244500649
122.36413028 177.341586719599 18.8330341007284
122.39013028 185.044746193337 19.2377101648474
122.41613028 173.796577811189 18.6438503432735
122.44213028 185.125461708066 19.2419053998332
122.46813028 199.761800799462 19.9880864916811
122.49413028 177.929444732044 18.8642224717609
122.52013028 200.052693343528 20.0026344936625
122.54613028 181.924909724145 19.074847822415
122.57213028 180.821318047699 19.0169039566223
122.59813028 183.076014249555 19.1350993856606
122.62413028 159.144581591301 17.8406603908769
122.65013028 176.777523577101 18.8030595157863
122.67613028 183.386983285098 19.151343727535
122.70213028 191.307604944444 19.5605523922227
122.72813028 178.833085654953 18.9120641736936
122.75413028 201.461918545562 20.0729628378853
122.78013028 196.19789755806 19.8089826875617
122.80613028 173.667788441585 18.6369411890248
122.83213028 189.084323133892 19.4465587255891
122.85813028 170.630162617817 18.4732326688004
122.88413028 189.116328604381 19.4482044726181
122.91013028 191.889874147665 19.5902972998199
122.93613028 202.88979981801 20.1439717939641
122.96213028 202.204877948828 20.109941717908
122.98813028 168.269728145846 18.3450117550165
123.01413028 236.965222892708 20.4521401086988
123.04013028 201.701763860447 20.0849079589849
123.06613028 192.852768868443 19.6393874073731
123.09213028 209.524290962007 20.4706761472115
123.11813028 184.732424330132 19.2214684314249
123.14413028 180.989543288363 19.0257479899405
123.17013028 191.69698067582 19.5804484461322
123.19613028 199.388402615676 19.9693967167602
123.22213028 205.988920665132 20.2972372831936
123.24813028 179.47597481267 18.9460272781747
123.27413028 183.417904880901 19.1529582509283
123.30013028 177.956192817048 18.865640345191
123.32613028 187.471716204437 19.3634561070299
123.35213028 187.839275694643 19.3824289341993
123.37813028 189.129347814269 19.4488738910133
123.40413028 172.992752126937 18.6006855855872
123.43013028 178.170022812541 18.8769713043455
123.45613028 168.013225691601 18.3310242862531
123.48213028 175.982303479074 18.7607197878479
123.50813028 191.648700339208 19.577982548731
123.53413028 199.169929414357 19.9584533175473
123.56013028 192.634487112157 19.6282697715391
123.58613028 180.753554623138 19.0133402969146
123.61213028 184.460711199215 19.2073273101291
123.63813028 189.519441891286 19.4689209711933
123.66413028 200.914091515302 20.04565247206
123.69013028 207.333333333333 20.3633657990684
123.71613028 211.805306631942 20.5818029643636
123.74213028 194.670258395392 19.7317134783268
123.76813028 184.086526459264 19.1878360665951
123.79413028 189.093587535866 19.4470351229109
123.82013028 183.351578147822 19.1494949357847
123.84613028 171.357833836673 18.5125813346855
123.87213028 177.672282371271 18.8505852625997
123.89813028 185.58594968137 19.2658220526075
123.92413028 182.898545999775 19.1258226489621
123.95013028 182.374361148305 19.0983958042713
123.97613028 182.992938923397 19.130757377762
124.00213028 194.348950854185 19.7154229401342
124.02813028 195.530730032191 19.7752739567466
124.05413028 190.757113337352 19.5323891696511
124.08013028 188.543154367884 19.418710274778
124.10613028 192.803391327875 19.6368730366051
124.13213028 203.319228541031 20.1652785024671
124.15813028 192.47091546534 19.6199345292149
124.18413028 185.98767138683 19.2866623025774
124.21013028 185.01849726001 19.2363456643932
124.23613028 190.624282846037 19.5255874608697
124.26213028 186.233881679193 19.2994239126039
124.28813028 177.625971983044 18.8481283942488
124.31413028 190.930159899702 19.5412466285906
124.34013028 190.336332512198 19.5108345547902
124.36613028 174 18.6547581061776
124.39213028 173.530886755202 18.6295940243046
124.41813028 174.946084273447 18.7054047950557
124.44413028 184.423852009341 19.2054081971377
124.47013028 185.863473140002 19.2802216346183
124.49613028 167.957624859877 18.3279908806108
124.52213028 170.542227216096 18.4684719030079
124.54813028 177.815284731005 18.8581698333112
124.57413028 187.348898534206 19.3571123122332
124.60013028 188.359305487129 19.4092403502625
124.62613028 195.62442832726 19.7800115433364
124.65213028 184.512189369653 19.210007255056
124.67813028 186.382068565327 19.3071006919903
124.70413028 186.764573194463 19.3269021415468
124.73013028 199.318383545752 19.9658900901388
124.75613028 184.641226299186 19.2167232534158
124.78213028 192.837315897343 19.6386005559125
124.80813028 170.680023039755 18.4759315348241
124.83413028 183.201418988876 19.141651913504
124.86013028 178.860959783641 18.9135379970878
124.88613028 190.422075830319 19.5152287114612
124.91213028 193.852552852466 19.6902286859481
124.93813028 179.321953264814 18.9378960428456
124.96413028 166.894519914754 18.2698943573713
124.99013028 188.928607563413 19.4385497176828
125.01613028 180.878533686772 19.0199123913215
125.04213028 177.056593015844 18.8178953666898
125.06813028 176.794054066811 18.8039386335316
125.09413028 195.374895875777 19.7673921332976
125.12013028 174.098680988419 18.6600472126101
125.14613028 174.606997581033 18.6872682637689
125.17213028 166.058313933725 18.2240672701637
125.19813028 201.174114546703 20.058619820252
125.22413028 183.768073232512 19.1712322625601
125.25013028 195.235489276609 19.7603385232445
125.27613028 165.158884184695 18.174646306583
125.30213028 198.5998644991 19.9298702704809
125.32813028 184.078724790298 19.1874294677686
125.35413028 175.465845729975 18.7331708864236
125.38013028 190.280079837637 19.5079511911239
125.40613028 184.234229847221 19.1955322847386
125.43213028 178.906969438212 18.9159704714409
125.45813028 177.406638749662 18.836487928999
125.48413028 176.086535139771 18.7662748109352
125.51013028 188.335684701208 19.408023325481
125.53613028 174.689268373191 18.6916702503116
125.56213028 174.540442356475 18.6837063965625
125.58813028 196.753433712842 19.8370075219445
125.61413028 181.623589688058 19.0590445556989
125.64013028 167.075424877785 18.2797934823009
125.66613028 188.417135922676 19.4122196527175
125.69213028 169.751272082502 18.4255948117016
125.71813028 180.660498873583 19.0084454321537
125.74413028 191.13484004732 19.5517180854942
125.77013028 157.976622742157 17.7750737124861
125.79613028 163.179144057624 18.0653892323207
125.82213028 185.346612198668 19.25339513949
125.84813028 190.530791032686 19.5207987045964
125.87413028 185.424904957015 19.2574611492281
125.90013028 160.709741084003 17.9281756508577
125.92613028 161.153250265325 17.9528967169828
125.95213028 155.2640279605 17.6218062615896
125.97813028 173.570769078067 18.6317347060367
126.00413028 173.791240593624 18.6435640687946
126.03013028 166.488463326943 18.2476553741539
126.05613028 180.914319389875 19.0217937844923
126.08213028 168.011784968266 18.3309456912766
126.10813028 160.929284830952 17.940417209806
126.13413028 174.616132392224 18.6877570827654
126.16013028 182.020904742768 19.0798797031201
126.18613028 177.329092702912 18.8323706793867
126.21213028 187.81215572442 19.3810296797884
126.23813028 182.151191567418 19.0867069746155
126.26413028 188.931837178117 19.4387158618113
126.29013028 194.15663636599 19.7056660057959
126.31613028 191.843219623252 19.5879156432354
126.34213028 178.369856213779 18.8875544321534
126.36813028 168.007531008675 18.3307136254252
126.39413028 168.234182412843 18.3430740287904
126.42013028 179.735463353555 18.9597185292163
126.44613028 177.488453792684 18.8408308623948
126.47213028 177.440687027615 18.8382954126755
126.49813028 184.429591802313 19.20570705818
126.52413028 180.31006854219 18.9900009764186
126.55013028 185.861313454095 19.2801096186767
126.57613028 190.865342717201 19.5379294049907
126.60213028 185.638533119455 19.2685512231436
126.62813028 183.335309637891 19.1486453639881
126.65413028 173.546217725329 18.6304169424803
126.68013028 168.786731864191 18.3731723915164
126.70613028 168.999990465735 18.3847757922546
126.73213028 176.180534168491 18.7712830764703
126.75813028 194.326042057826 19.7142609325243
126.78413028 187.464383613774 19.3630774214108
126.81013028 174.572082298015 18.6853997708379
126.83613028 170.024233874895 18.4404031341452
126.86213028 167.577272326838 18.3072265691359
126.88813028 175.997649485888 18.7615377560523
126.91413028 162.165516170487 18.0091929952726
126.94013028 153.270244278661 17.5082977058685
126.96613028 169.97195814346 18.4375680686722
126.99213028 164.788170263105 18.1542375363497
127.01813028 178.638188129512 18.9017559041224
127.04413028 175.688395865708 18.7450471253453
127.07013028 185.59516029279 19.2663001270503
127.09613028 183.971774762115 19.1818546945865
127.12213028 198.113306325147 19.9054417848561
127.14813028 193.731511361269 19.6840804388353
127.17413028 174.645968405613 18.6893535685755
127.20013028 173.761970234821 18.6419940046563
127.22613028 180.18020336147 18.9831611362002
127.25213028 178.930781669176 18.9172292722363
127.27813028 174.500920914085 18.6815909876051
127.30413028 178.726099197221 18.9064062792071
127.33013028 186.103382016645 19.2926608852509
127.35613028 183.177032422919 19.140377865806
127.38213028 184.80407789274 19.2251958581826
127.40813028 175.601131992179 18.7403912441645
127.43413028 177.939511343685 18.8647560993343
127.46013028 177.420522640281 18.8372249888502
127.48613028 154.658582715762 17.5874149729722
127.51213028 176.57855718093 18.7924749397694
127.53813028 189.798349958365 19.4832415146127
127.56413028 188.85508698486 19.434767144726
127.59013028 188.160498755111 19.398994755147
127.61613028 176.971765227854 18.8133870011678
127.64213028 182.140860651665 19.0861657045969
127.66813028 167.943089743247 18.3271978078072
127.69413028 172.844246529311 18.5926999937777
127.72013028 170.835091416039 18.4843226230251
127.74613028 201.181576728153 20.0589918354913
127.77213028 181.79354367336 19.0679597059234
127.79813028 177.973138594528 18.8665385587568
127.82413028 165.613948752191 18.1996675108196
127.85013028 171.699746477695 18.5310413348897
127.87613028 163.259939404421 18.0698610622451
127.90213028 189.160777242156 19.4504898263337
127.92813028 175.317312383318 18.7252403126538
127.95413028 168.716794333862 18.3693654944237
127.98013028 190.937993966362 19.5416475235003
128.00613028 173.825880567684 18.6454219886643
128.03213028 200.289324554263 20.0144609997004
128.05813028 176.560749663866 18.7915273282331
128.08413028 176.590492516017 18.7931100415028
128.11013028 172.934878288941 18.5975739433368
128.13613028 182.51226455307 19.1056151198055
128.16213028 173.593573234474 18.6329586075038
128.18813028 184.709069555825 19.220253357114
128.21413028 166.348325669674 18.2399739950294
128.24013028 169.300013789141 18.4010876737839
128.26613028 161.848142169872 17.9915614758626
128.29213028 163.544970154533 18.0856280042764
128.31813028 158.309541641474 17.793793392162
128.34413028 169.144383790101 18.3926280770368
128.37013028 178.558942794667 18.8975629537074
128.39613028 187.139616258964 19.3462976436818
128.42213028 172.931661386573 18.5974009682306
128.44813028 175.229020133053 18.7205245724073
128.47413028 180.372163325352 18.9932705622466
128.50013028 161.991886592523 17.9995492494964
128.52613028 175.247236581697 18.7214976207406
128.55213028 180.157154586303 18.9819469278735
128.57813028 176.982616688149 18.8139637869402
128.60413028 165.578070504656 18.1976960357434
128.63013028 170.324347418406 18.456670740868
128.65613028 190.723228138572 19.5306542716096
128.68213028 218.179717804788 19.6642849357072
128.70813028 165.277677620313 18.1811813488735
128.73413028 172.956943797438 18.598760377909
128.76013028 180.593774213763 19.0049348440748
128.78613028 176.633463383903 18.7953964248644
128.81213028 189.520964154197 19.468999160419
128.83813028 184.874454428024 19.2288561504851
128.86413028 180.387201625506 18.9940623156557
128.89013028 167.357210359698 18.2952021229446
128.91613028 180.59543816301 19.0050223974091
128.94213028 183.486393624213 19.1565338004668
128.96813028 168.048824598338 18.3329661865361
128.99413028 165.970594311051 18.2192532399685
129.02013028 183.894004872627 19.1777999193144
129.04613028 191.212199297701 19.5556743324132
129.07213028 192.43881512608 19.6182983526136
129.09813028 192.368533459569 19.6147155706918
129.12413028 182.720297550005 19.1165005976515
129.15013028 171.663483015771 18.52908432793
129.17613028 173.646930516368 18.6358219843595
129.20213028 177.61263064665 18.8474205474728
129.22813028 184.43814189038 19.2061522377794
129.25413028 177.444769227523 18.8385121083128
129.28013028 167.51303118694 18.3037171736748
129.30613028 172.062608971525 18.5506123333719
129.33213028 169.422401751741 18.4077375987241
129.35813028 167.39109726598 18.2970542583215
129.38413028 160.412100055596 17.9115660987863
129.41013028 164.024310765831 18.1121125640181
129.43613028 180.374307357748 18.9933834457027
129.46213028 174.326909062886 18.6722740480578
129.48813028 180.848929579818 19.0183558479601
129.51413028 188.270455172104 19.4046620775577
129.54013028 163.979985362667 18.1096651190831
129.56613028 176.363982798163 18.7810533675916
129.59213028 179.523396824732 18.948530118441
129.61813028 171.858180415666 18.5395890146285
129.64413028 175.853503104627 18.7538531030094
129.67013028 188.111181361281 19.396452323107
129.69613028 188.730512820933 19.428356225936
129.72213028 164.199615297857 18.1217888354245
129.74813028 186.513722637418 19.3139184339904
129.77413028 187.091622236151 19.3438166986844
129.80013028 180.58665384419 19.004560181398
129.82613028 188.299475029837 19.4061575294976
129.85213028 186.52524330157 19.3145149202132
129.87813028 159.97805013631 17.8873167432295
129.90413028 161.1452461465 17.9524508714827
129.93013028 171.620213121548 18.5267489388478
129.95613028 177.560548067764 18.8446569651859
129.98213028 184.128050247815 19.1900000129137
130.00813028 177.117221034151 18.8211169187246
130.03413028 194.132464962263 19.7044393456025
130.06013028 190.387763248252 19.5134703857746
130.08613028 174.146234298775 18.6625954410835
130.11213028 188.279574329802 19.405132018608
130.13813028 206.047162356598 20.30010651975
130.16413028 187.970932091062 19.3892203087727
130.19013028 182.422811537071 19.1009325184438
130.21613028 174.648368061419 18.6894819650743
130.24213028 187.20453931506 19.3496531914688
130.26813028 184.031787983915 19.1849830848982
130.29413028 204.143142338552 20.2060952357724
130.32013028 186.437811083369 19.3099876273067
130.34613028 177.333333333333 18.8325958557674
130.37213028 179.099260209102 18.9261332664177
130.39813028 201.11224763812 20.0555352777292
130.42413028 177.265023322701 18.8289682841467
130.45013028 187.92110577435 19.3866503436953
130.47613028 169.939963060986 18.4358326669009
130.50213028 168.294743928233 18.3463753329225
130.52813028 182.775188099667 19.1193717522134
130.55413028 193.332159238446 19.6637818965959
130.58013028 188.711796603825 19.4273928566766
130.60613028 187.359457324534 19.3576577779717
130.63213028 202.861088757604 20.1425464506156
130.65813028 193.727709118976 19.6838872745693
130.68413028 182.559411872981 19.1080826810531
130.71013028 207.085808967263 20.3512067930756
130.73613028 243.696698214445 21.0650375662892
130.76213028 206.723962137806 20.3334189027722
130.78813028 222.885685837222 21.1132984555811
130.81413028 248.029617235762 20.5953471792137
130.84013028 262.211046936983 20.9782403875398
130.86613028 274.803904660937 21.6380643018722
130.89213028 330.947375464125 22.8767690615725
130.91813028 321.453233041956 23.0503791085016
130.94413028 335.122306117804 22.9520703799186
130.97013028 359.359735574258 23.1286420094698
130.99613028 385.377375891812 23.6894637066608
131.02213028 392.030669723968 24.3628557847108
131.04813028 381.680337923662 23.5954574424266
131.07413028 366.724949170028 23.4446877127507
131.10013028 347.340954769418 22.6103340068678
131.12613028 333.83165520936 22.4828062719234
131.15213028 313.605618361138 22.4571006859039
131.17813028 258.244145609063 21.3589544092383
131.20413028 255.294146283761 20.9938315262317
131.23013028 256.886284932708 20.9442135961092
131.25613028 222.05690390057 21.0740078722853
131.28213028 243.81695858466 20.7248956330982
131.30813028 219.066612193101 20.9316321481676
131.33413028 214.126445828495 20.6942719528132
131.36013028 215.642201739111 20.7673879791904
131.38613028 218.942460763841 20.9257000247944
131.41213028 218.205824169147 20.8904678822255
131.43813028 221.752624293259 21.0595643019156
131.46413028 211.228848806577 21.6473279508191
131.49013028 209.073740841287 21.8811460739986
131.51613028 210.077085426467 23.0341714822363
131.54213028 201.781022158777 22.7949342814492
131.56813028 190.366121958024 22.7773084255414
131.59413028 202.199609613032 23.5115984977616
131.62013028 215.448903661379 24.3112340481238
131.64613028 154.508668854589 23.2296550252211
131.67213028 219.502162365634 20.9524300435837
131.69813028 157.553042035184 22.8451336007901
131.72413028 171.630153335433 22.7608714232143
131.75013028 174.211793944645 22.4999175629781
131.77613028 216.932192319146 20.8294115288525
131.80213028 207.266974202568 20.3601067876653
131.82813028 209.614518438607 20.4750833179554
131.85413028 211.603233238868 20.5719825606998
131.88013028 207.294764467342 20.3614716789992
131.90613028 200.980819116285 20.0489809774105
131.93213028 195.094120792754 19.7531830747732
131.95813028 199.380736276858 19.9690128086923
131.98413028 195.93951366802 19.7959346163812
132.01013028 200.076720119889 20.0038356381914
132.03613028 198.61120410626 19.9304392378221
132.06213028 186.648873569473 19.3209147593727
132.08813028 191.269236204094 19.5585907572143
132.11413028 191.030630396312 19.5463874102767
132.14013028 191.406567598091 19.5656110355946
132.16613028 201.7472222803 20.0871711438072
132.19213028 197.663134847741 19.8828134250534
132.21813028 193.379929418528 19.6662110951006
132.24413028 202.762133077051 20.1376330822195
132.27013028 187.381521125509 19.3587975414543
132.29613028 189.552722681605 19.4706303278351
132.32213028 185.194285907052 19.2454818545575
132.34813028 181.156134036327 19.0345020442526
132.37413028 185.350677037553 19.253606261558
132.40013028 182.685379942652 19.1146739413809
132.42613028 191.619488419627 19.5764904116967
132.45213028 189.585212267088 19.4722989021373
132.47813028 183.142704187345 19.1385842834492
132.50413028 200.577008876485 20.0288296650845
132.53013028 202.122964622039 20.105868030107
132.55613028 181.307290881722 19.042441591441
132.58213028 195.621004326383 19.77983843849
132.60813028 200.931244391321 20.0465081443787
132.63413028 175.470978790157 18.7334448935671
132.66013028 177.834428331441 18.8591849416374
132.68613028 185.582164800096 19.2656255958687
132.71213028 188.904883228219 19.4373292007013
132.73813028 197.887915204115 19.8941154718733
132.76413028 190.45752437023 19.5170450821957
132.79013028 188.25581418186 19.4039075539882
132.81613028 181.451951451344 19.0500368215573
132.84213028 178.169453126111 18.8769411254107
132.86813028 178.317881215985 18.8848024197228
132.89413028 173.5980370908 18.6331981737328
132.92013028 200.984570983043 20.0491681115722
132.94613028 231.701496831096 20.962833504686
132.97213028 173.911133414648 18.6499937487737
132.99813028 196.981928415771 19.8485227871381
133.02413028 200.756995368218 20.0378140209065
133.05013028 190.633564609022 19.5260628191667
133.07613028 178.203427927964 18.8787408440269
133.10213028 228.86217118032 20.5255599724133
133.12813028 195.429038006318 19.7701309052984
133.15413028 200.340425100124 20.0170140180859
133.18013028 160.077264998469 17.8928625433981
133.20613028 188.986547287576 19.4415301500461
133.23213028 190.637673941145 19.5262732717303
133.25813028 199.704442857249 19.9852166791981
133.28413028 188.499069551654 19.4164399183606
133.31013028 188.632325718742 19.4233017645684
133.33613028 205.560859806244 20.2761367033389
133.36213028 195.522938751256 19.7748799617725
133.38813028 194.054185533088 19.7004662651973
133.41413028 193.394133728142 19.6669333516002
133.44013028 196.329590384021 19.8156297090969
133.46613028 193.703483924586 19.6826565241883
133.49213028 193.919355020029 19.6936210494682
133.51813028 198.63525459979 19.9316459229934
133.54413028 221.672219900199 21.0557460043666
133.57013028 191.362707241401 19.5633692006976
133.59613028 204.918011726708 20.2444072141768
133.62213028 198.713613861048 19.9355769347691
133.64813028 203.768989379465 20.1875699072209
133.67413028 208.031921606572 20.3976430798547
133.70013028 200.670124772764 20.0334782188597
133.72613028 207.090473565964 20.351435996802
133.75213028 203.614729569003 20.1799271341104
133.77813028 197.89393433789 19.8944180280746
133.80413028 204.772960203343 20.2372409287108
133.83013028 207.833361817655 20.3879063082826
133.85613028 203.559277396593 20.1771790593528
133.88213028 207.354786369672 20.3644192831356
133.90813028 216.53609182071 20.8103864366191
133.93413028 206.073400285078 20.301398980616
133.96013028 210.00575018099 20.4941821101009
133.98613028 219.524071767945 20.9534756910611
134.01213028 216.101582120439 20.7894964883924
134.03813028 261.14604711431 21.2750331451435
134.06413028 255.793033701595 21.0710836743514
134.09013028 226.40218613511 21.2792004612537
134.11613028 254.773667797908 21.2805599673856
134.14213028 225.102611350903 21.2180400296966
134.16813028 228.007023176486 21.3544853919024
134.19413028 252.420386724195 21.779762503466
134.22013028 265.301766894308 22.2517261485375
134.24613028 285.5590680032 21.8044178781022
134.27213028 307.931178498655 22.4617597656844
134.29813028 316.537414802987 22.8543068456824
134.32413028 308.223467911578 22.7547035157222
134.35013028 326.901137455782 23.0932429248254
134.37613028 349.383570201053 23.5326011758684
134.40213028 350.109279643464 23.8108005941823
134.42813028 375.849622840834 23.9905710014163
134.45413028 403.849111449639 24.3830255525262
134.48013028 423.789591863733 25.1271409419301
134.50613028 471.513133880662 26.4066697594554
134.53213028 523.92204212328 27.2620747112313
134.55813028 571.817660540267 28.0577506460478
134.58413028 635.648715525008 29.3466109343938
134.61013028 728.159399876828 30.6078279108524
134.63613028 837.270778997367 32.4279559715083
134.66213028 909.005034672298 33.6536182664963
134.68813028 996.160091203798 34.851077427967
134.71413028 1116.96306565453 37.1092681336471
134.74013028 1195.13934360942 38.0354138300766
134.76613028 1257.24548313225 38.6888002844216
134.79213028 1263.95717443792 38.9108501600913
134.81813028 1185.66521476521 37.6781030939827
134.84413028 1086.35313819612 36.3491428612581
134.87013028 938.57402480332 34.4325365660233
134.89613028 827.633080971284 32.9718987944741
134.92213028 756.511118239592 32.1687613666719
134.94813028 623.26539787356 30.3799822552828
134.97413028 522.056209530647 28.8433684264125
135.00013028 484.842396716433 28.09446895202
135.02613028 456.240281859371 27.8229600297084
135.05213028 353.886585188028 26.3204410260554
135.07813028 331.508120319631 25.9911710466794
135.10413028 307.590205271459 25.9024611863141
135.13013028 299.644366207026 26.25827574879
135.15613028 297.534830728385 26.621512674504
135.18213028 269.005224174279 26.8085611594079
135.20813028 266.883746375263 27.6738340353211
135.23413028 244.41752972245 28.1249983693904
135.26013028 195.004292735803 28.2505752517082
135.28613028 239.103564491027 30.3607526898062
135.31213028 259.429055069323 32.2729163743664
135.33813028 182.829725785601 32.3760844159
135.36413028 212.408066634784 33.9986449318525
135.39013028 232.0282674075 35.7550651079903
135.41613028 195.610952346091 36.5463430347434
135.44213028 241.439588960618 38.0596230939207
135.46813028 177.482025610626 37.6366966707352
135.49413028 169.753151687731 37.0639402144311
135.52013028 180.401172405131 36.039699667159
135.54613028 235.018520008487 35.1506260414734
135.57213028 200.662326820703 32.7810354262385
135.59813028 185.685189951118 31.1318580483936
135.62413028 197.215699687552 29.7836627161056
135.65013028 198.736261962279 27.7897048700787
135.67613028 208.78451922968 26.61047545523
135.70213028 190.511542779423 25.6305840093947
135.72813028 156.464212812438 23.8898407868881
135.75413028 252.241067848027 24.3498701962
135.78013028 222.768426902962 21.107743929798
135.80613028 209.894896555873 22.5808419891463
135.83213028 222.251528441384 21.0832411379932
135.85813028 223.301471873491 21.1329823675454
135.88413028 210.821452475602 21.7861757388716
135.91013028 217.829061040496 20.8724249209571
135.93613028 219.856898739664 20.9693537687581
135.96213028 214.381511591011 20.7065937126806
135.98813028 205.970398834175 20.2963247330237
136.01413028 190.057164172861 19.4965209292766
136.04013028 198.337577141837 19.9167054073628
136.06613028 193.355162903567 19.6649517112841
136.09213028 203.308305929272 20.1647368407957
136.11813028 218.112175015973 20.8859845358543
136.14413028 193.99123939839 19.6972708464086
136.17013028 169.43112654066 18.4082115666167
136.19613028 183.507024765532 19.1576107469346
136.22213028 192.806073265822 19.6370096127604
136.24813028 197.309078065578 19.8649982665782
136.27413028 200.179592596833 20.0089776149024
136.30013028 179.135335167169 18.9280392628063
136.32613028 209.0901161006 20.4494555477939
136.35213028 192.797428925832 19.6365694012896
136.37813028 190.665948320919 19.5277212352553
136.40413028 185.858113912757 19.2799436675918
136.43013028 173.390611443476 18.6220627989208
136.45613028 180.969070577549 19.0246719066348
136.48213028 187.126562943869 19.3456229128901
136.50813028 190.912186362314 19.5403268325949
136.53413028 176.680014976056 18.7978730167035
136.56013028 189.552053477737 19.4705959578918
136.58613028 197.333333333333 19.8662192343351
136.61213028 170.716846416892 18.4779244731053
136.63813028 175.401399815874 18.7297303672997
136.66413028 174.865504088868 18.7010964431965
136.69013028 182.521296431815 19.1060878482129
136.71613028 183.90976616721 19.1786217527334
136.74213028 178.778349503954 18.9091697069942
136.76813028 199.132553711768 19.956580554382
136.79413028 195.908564323284 19.7943711354155
136.82013028 177.474292885597 18.8400792400455
136.84613028 185.977991697086 19.2861604108794
136.87213028 181.586861796475 19.0571173998837
136.89813028 175.861414679037 18.7542749622073
136.92413028 179.425719879031 18.9433745609926
136.95013028 186.712411400306 19.3242030314477
136.97613028 190.168515586297 19.5022314408529
137.00213028 176.077795930995 18.7658091182339
137.02813028 174.86614663439 18.7011308018735
137.05413028 181.947524143026 19.0760333477914
137.08013028 193.920326665055 19.6936703874649
137.10613028 200.66866033223 20.033405119062
137.13213028 189.767550980459 19.4816606571647
137.15813028 191.386516531221 19.5645861970664
137.18413028 202.740580523306 20.1365627912664
137.21013028 192.301940098045 19.6113202053327
137.23613028 174.666666666667 18.6904610251682
137.26213028 179.069667723794 18.9245696238406
137.28813028 183.232073956228 19.1432533262363
137.31413028 185.818192219204 19.2778729230797
137.34013028 188.168356538964 19.3993998123119
137.36613028 183.467888537441 19.1555677826287
137.39213028 178.676107476794 18.9037619259656
137.41813028 179.994791139563 18.9733914279742
137.44413028 190.65814029579 19.5273213880342
137.47013028 186.311154124496 19.3034273705213
137.49613028 206.388655061181 20.316921767885
137.52213028 207.023579470797 20.3481487841424
137.54813028 178.238197493027 18.8805824853487
137.57413028 184.469396617422 19.2077794977671
137.60013028 200.321012546914 20.0160441919433
137.62613028 185.141661390753 19.2427472773901
137.65213028 190.887817157273 19.5390796690772
137.67813028 198.795970224644 19.9397076319912
137.70413028 209.333333333333 20.4613456709637
137.73013028 212.997117082751 20.6396277622806
137.75613028 219.472759617851 20.9510266869121
137.78213028 217.02922548568 20.8340694769735
137.80813028 269.450412855615 21.5029024049637
137.83413028 250.866869172632 21.3653145710363
137.86013028 247.779285993411 20.9871443596192
137.88613028 280.315415760795 21.8749833236913
137.91213028 287.041823964962 22.4180048339421
137.93813028 336.595333280477 23.0914880580794
137.96413028 342.229014362844 22.7166679681914
137.99013028 351.052603397831 22.9683076730855
138.01613028 424.068606076195 24.5280714016025
138.04213028 429.650525050984 24.7451211819697
138.06813028 468.263812801074 25.7827351270464
138.09413028 413.814217503285 24.6863049063188
138.12013028 411.871430629006 24.5049006319245
138.14613028 337.149277251873 22.7679623804501
138.17213028 318.567758736722 22.4600956621084
138.19813028 264.555339898285 21.2902044777117
138.22413028 272.115808192003 21.702683276996
138.25013028 297.135875185136 22.4788314176895
138.27613028 261.893521809885 21.3735009184123
138.30213028 255.276115663868 20.949957790727
138.32813028 218.26788887894 20.8934386293372
138.35413028 225.654397346467 21.2440296246483
138.38013028 211.369710732547 20.5606279443283
138.40613028 214.094220547114 20.6927146864356
138.43213028 255.002531579945 21.506418479729
138.45813028 205.881595336674 20.2919489126438
138.48413028 235.820964853894 21.7193590250189
138.51013028 230.882486295884 21.4887173323995
138.53613028 229.14813674369 21.8222219772717
138.56213028 228.927317731721 22.0570745348203
138.58813028 222.472771476422 21.0937323144304
138.61413028 212.70615167961 20.6255255292858
138.64013028 235.165271171858 21.6871054394937
138.66613028 224.811408989929 22.7980362758979
138.69213028 232.473194676721 23.7451848184946
138.71813028 243.745372681373 24.1092424615206
138.74413028 225.381626062761 24.1893320570447
138.77013028 219.852072310339 25.2304801243378
138.79613028 221.49726104123 25.4821862819101
138.82213028 195.537487071724 25.4173928855407
138.84813028 194.475853079608 24.4902456910628
138.87413028 229.297982466564 24.9872305531663
138.90013028 228.102907559015 23.5954896916262
138.92613028 234.933074360898 21.6763961193229
138.95213028 235.832574644671 21.7178532385073
138.97813028 228.955426183174 21.3988516599921
139.00413028 221.042240326351 22.6206145332172
139.03013028 217.689185979887 20.8657224164363
139.05613028 209.511323835166 20.4700426885322
139.08213028 215.468757250012 20.7590345271649
139.10813028 220.276602663011 20.9893593357687
139.13413028 207.783292589686 20.3854503305512
139.16013028 205.530557655695 20.2746421746819
139.18613028 206.666666666667 20.3306009093025
139.21213028 200.169470487126 20.008471730101
139.23813028 212.429862462609 20.6121256770188
139.26413028 200.84824889724 20.0423675695882
139.29013028 196.88664941856 19.8437218998131
139.31613028 185.329301508974 19.2524960204631
139.34213028 188.344267186971 19.4084655337289
139.36813028 187.634055933955 19.371838112784
139.39413028 183.582218590652 19.161535355532
139.42013028 198.135329047919 19.906548121054
139.44613028 208.95154007696 20.4426779105361
139.47213028 208.010315879074 20.3965838256839
139.49813028 214.884427878418 20.7308672215331
139.52413028 204.124261334725 20.205160792962
139.55013028 196.915199107287 19.8451605741695
139.57613028 189.522345347629 19.4690701035067
139.60213028 179.572079119927 18.9510991301258
139.62813028 175.084190128077 18.7127865443967
139.65413028 180.790819803455 19.015300145065
139.68013028 183.146379779999 19.1387763339248
139.70613028 176.30798465652 18.7780715014359
139.73213028 170.685208182965 18.4762121758203
139.75813028 176.096693679022 18.7668161220289
139.78413028 175.169011559882 18.7173188015742
139.81013028 176.746909071222 18.8014312790927
139.83613028 184.672109757826 19.2183302998895
139.86213028 167.636010845645 18.3104347761404
139.88813028 168.140997689321 18.3379932211418
139.91413028 180.287094950435 18.9887911648127
139.94013028 173.538090988692 18.6299807293884
139.96613028 170.600386751156 18.4716207600284
139.99213028 170.020541538044 18.4402029022483
140.01813028 170.547816025418 18.4687745140504
140.04413028 172.389146149179 18.5682064911601
140.07013028 164.8856985496 18.1596089467587
140.09613028 188.254368809865 19.4038330651377
140.12213028 190.713056886961 19.5301334806991
140.14813028 179.040275364005 18.9230164278323
140.17413028 174.61470670557 18.6876807927346
140.20013028 178.837694138737 18.9123078517
140.22613028 167.368973318262 18.2958450648371
140.25213028 166.383711121525 18.2419138865156
140.27813028 175.1612977867 18.7169066774775
140.30413028 160 17.8885438199983
140.33013028 162.69469581085 18.0385529248247
140.35613028 170.173031525669 18.4484704799975
140.38213028 172.164416642196 18.5560996247701
140.40813028 172.991225215447 18.6006034964163
140.43413028 166.694876251049 18.2589636207014
140.46013028 183.347517957605 19.149282908642
140.48613028 178.246795015475 18.881037843057
140.51213028 177.066693732694 18.8184321202747
140.53813028 180.187396590126 18.9835400592264
140.56413028 184.744864556253 19.2221156253027
140.59013028 175.659506689462 18.7435058988153
140.61613028 174.855063267668 18.700538134913
140.64213028 176.726364118151 18.8003385138753
140.66813028 159.939629929642 17.8851687120721
140.69413028 148.116678242993 17.2114309830992
140.72013028 156.309001411598 17.6810068385031
140.74613028 176.302402203376 18.7777742133287
140.77213028 163.943347691183 18.1076419056255
140.79813028 175.515069962566 18.7357983530228
140.82413028 177.711081436164 18.8526433921699
140.85013028 181.100366093582 19.0315719841311
140.87613028 169.78141053706 18.4272304233197
140.90213028 175.608964351327 18.7408091795059
140.92813028 156.412568517095 17.686863402938
140.95413028 166.877367655562 18.2689555068461
140.98013028 204.330670400305 19.4017375031213
141.00613028 174.390907291536 18.6757011804931
141.03213028 150.675027634041 17.3594370665665
141.05813028 155.955442073608 17.660998956662
141.08413028 156.654482064146 17.7005357017321
141.11013028 165.088940298196 18.1707974672658
141.13613028 171.104604399675 18.4988975022662
141.16213028 187.19927030791 19.3493808845611
141.18813028 161.623050074984 17.9790461412714
141.21413028 207.325644784139 19.5617874425296
141.24013028 177.200789155813 18.8255565206351
141.26613028 161.95341662715 17.9974118487715
141.29213028 170.29167739271 18.45490056287
141.31813028 162.409108703479 18.0227139301205
141.34413028 174.276669165929 18.6695832393725
141.37013028 173.091407073927 18.605988663542
141.39613028 155.41355496185 17.6302895587026
141.42213028 182.228087478869 19.0907353173663
141.44813028 172.724609331991 18.5862642471257
141.47413028 170 18.4390889145858
141.50013028 165.610845787125 18.1994970143202
141.52613028 167.376813741109 18.2962735955226
141.55213028 171.212487319007 18.5047284399964
141.57813028 175.172798148678 18.7175211044987
141.60413028 174.955630340549 18.7059151254649
141.63013028 153.012728010469 17.4935832813331
141.65613028 164.989050492862 18.1652993640547
141.68213028 174.685388623166 18.6914626834374
141.70813028 181.45297921106 19.0500907720178
141.73413028 186.757106981169 19.3265158257338
141.76013028 176.902599833831 18.809710249434
141.78613028 167.431977892218 18.2992883955753
141.81213028 166.741131141202 18.2614967152861
141.83813028 163.632124739449 18.0904463593052
141.86413028 169.75261561274 18.4256677280765
141.89013028 164.79432766826 18.1545767049667
141.91613028 171.294022404407 18.5091340912754
141.94213028 161.836151336732 17.9908949936756
141.96813028 159.154921187563 17.8412399337918
141.99413028 172.151085693827 18.555381197584
142.02013028 170.089406198428 18.4439370091328
142.04613028 184.590745815291 19.2140961700149
142.07213028 181.34820855433 19.0445902321016
142.09813028 169.747323505234 18.4253805119587
142.12413028 170.226217047883 18.4513531779045
142.15013028 175.16606066916 18.7171611452784
142.17613028 168.583553203454 18.3621106196131
142.20213028 171.694537617283 18.5307602443766
142.22813028 176.365718515804 18.7811457859101
142.25413028 177.615092773719 18.8475511817169
142.28013028 183.784722308174 19.1721006834501
142.30613028 179.12832873487 18.9276690976396
142.33213028 162.220636919059 18.012253435873
142.35813028 172.812291908297 18.5909812494283
142.38413028 179.431745985795 18.9436926698991
142.41013028 169.391109978335 18.4060375952205
142.43613028 170.365185258915 18.458883241351
142.46213028 166.793927417179 18.2643876118078
142.48813028 175.576203488735 18.7390609950838
142.51413028 180.136021968964 18.9808335943901
142.54013028 179.408597693208 18.9424706779875
142.56613028 178.728736025129 18.9065457461234
142.59213028 178.374655525785 18.8878085296196
142.61813028 176.249021204266 18.7749312224714
142.64413028 164.545863438051 18.1408855041892
142.67013028 170.478539018436 18.4650230987365
142.69613028 167.197988631922 18.2864971294079
142.72213028 166.634773425946 18.2556716351903
142.74813028 156.347438979292 17.6831806516414
142.77413028 179.170750692547 18.9299102318287
142.80013028 180.207409519947 18.9845942553402
142.82613028 163.10367957222 18.0612114528467
142.85213028 169.596594659951 18.4171981940767
142.87813028 166.825855379932 18.2661356274354
142.90413028 175.326574460957 18.7257349367632
142.93013028 170.891038708292 18.487349118156
142.95613028 173.702784647377 18.6388188814301
142.98213028 187.102570272706 19.344382661264
143.00813028 174.397339388713 18.6760455872603
143.03413028 163.09333765164 18.0606388398439
143.06013028 186.330721693194 19.304441027556
143.08613028 176.457673029536 18.7860412556523
143.11213028 162.718561832196 18.0398759326219
143.13813028 168.131907988182 18.337497538551
143.16413028 169.042546046051 18.3870903650388
143.19013028 170.666666666667 18.475208614068
143.21613028 169.994286248552 18.4387790403026
143.24213028 168.670188951335 18.3668281938573
143.26813028 178.641497576295 18.9019309900494
143.29413028 176.049948934508 18.7643251375853
143.32013028 183.810627105314 19.1734518073984
143.34613028 177.210109055862 18.8260515805021
143.37213028 171.333333333333 18.5112578358864
143.39813028 171.793648930139 18.53610794801
143.42413028 175.822566472248 18.7522034157188
143.45013028 173.89494070494 18.649125486464
143.47613028 171.977944879529 18.5460478204673
143.50213028 162.27366742579 18.0151973303536
143.52813028 155.117503316094 17.613489337215
143.55413028 139.798843844532 16.7211748298098
143.58013028 184.038910677849 19.1853543453255
143.60613028 185.140726175276 19.2426986763955
143.63213028 175.295979640439 18.7241010273091
143.65813028 171.335668810764 18.5113840007042
143.68413028 169.354345657211 18.4040400813088
143.71013028 162.802856363474 18.0445480056151
143.73613028 174.30245770144 18.6709645011413
143.76213028 181.704664375647 19.0632979505461
143.78813028 187.698828006406 19.3751814446423
143.81413028 174.841646747856 18.6998206808438
143.84013028 177.719840330284 18.8531079841115
143.86613028 173.706490313381 18.6390176947918
143.89213028 152.097305060467 17.44117570925
143.91813028 159.602060851481 17.8662844963065
143.94413028 180.25262673606 18.9869758906499
143.97013028 179.732171267787 18.9595448926279
143.99613028 183.975607077769 19.1820544821335
144.02213028 164.588239194987 18.1432212793091
144.04813028 159.632169849497 17.867969657994
144.07413028 156.531135168876 17.6935657892284
144.10013028 164.30737156756 18.1277340871693
144.12613028 166 18.2208671582886
144.15213028 181.677256384122 19.0618601602321
144.17813028 180.527511659265 19.0014479268957
144.20413028 166.676565550467 18.2579607596504
144.23013028 174.269093047205 18.6691774348633
144.25613028 163.451672110551 18.0804685841131
144.28213028 175.57399698527 18.7389432458327
144.30813028 169.145831486415 18.3927067875512
144.33413028 154.953222004038 17.6041598495377
144.36013028 167.426646414012 18.2989970443198
144.38613028 167.079536534224 18.2800184099592
144.41213028 168.936684541326 18.3813320812897
144.43813028 164.11702470351 18.1172307322896
144.46413028 171.018884181932 18.4942631203264
144.49013028 169.423509343723 18.4077977685395
144.51613028 161.738809846694 17.9854835824169
144.54213028 169.926264259229 18.4350895988726
144.56813028 173.159547032189 18.6096505626618
144.59413028 171.14371520306 18.5010116049399
144.62013028 167.715973909427 18.3148013316785
144.64613028 156.457008474361 17.6893758213432
144.67213028 157.607729492886 17.7543081809957
144.69813028 172.042073789637 18.549505318991
144.72413028 167.604760150454 18.3087279815095
144.75013028 159.223093543714 17.8450605795393
144.77613028 168.976302560073 18.3834872948564
144.80213028 166.910855544423 18.2707884637978
144.82813028 176.289330910421 18.777078095935
144.85413028 185.294080843628 19.2506665257922
144.88013028 174.936512781639 18.7048930914688
144.90613028 170.030861448968 18.4407625356962
144.93213028 175.114606215919 18.7144118911559
144.95813028 175.642455655202 18.7425961731667
144.98413028 168.71080527346 18.3690394562949
145.01013028 166.300247166133 18.2373379179163
145.03613028 166.386264085698 18.2420538364351
145.06213028 170.278531533189 18.4541882256137
145.08813028 169.950799484596 18.4364204489156
145.11413028 162.370821502618 18.0205894189185
145.14013028 162.867690906984 18.0481406747057
145.16613028 171.065386015178 18.4967773417522
145.19213028 179.010663193353 18.9214514873121
145.21813028 176.936052383832 18.8114886377358
145.24413028 171.289603658119 18.508895356456
145.27013028 162 18
145.29613028 169.486233960054 18.4112049556814
145.32213028 183.457557621682 19.1550284584326
145.34813028 177.256477883298 18.8285144333427
145.37413028 159.495760958623 17.8603337571627
145.40013028 159.792388646993 17.876934225252
145.42613028 168.848601097109 18.3765394510016
145.45213028 170.950740191622 18.4905781516761
145.47813028 171.715223165979 18.5318764924645
145.50413028 175.717333093166 18.7465907883629
145.53013028 173.226843702952 18.6132664356879
145.55613028 178.61471367856 18.9005139442587
145.58213028 161.075667789034 17.9485747506053
145.60813028 157.006992249364 17.7204397377359
145.63413028 158.490643788884 17.8039683098395
145.66013028 158.587602388834 17.8094133754503
145.68613028 153.098090762885 17.4984622617466
145.71213028 153.44888026716 17.5184976677317
145.73813028 165.314557586279 18.1832097049052
145.76413028 162.275245803598 18.0152849438247
145.79013028 164.134711927121 18.1182069712828
145.81613028 176.636723688983 18.795569887023
145.84213028 163.778741928281 18.0985492196629
145.86813028 164.018850930472 18.111811114876
145.89413028 169.677545022238 18.4215930376413
145.92013028 160.181568901393 17.8986909522117
145.94613028 162.848385934898 18.0470710052849
145.97213028 172.01490297001 18.5480404878796
145.99813028 161.716240537693 17.9842286761314
146.02413028 162.163633501031 18.0090884556121
146.05013028 187.97414496158 19.3893860120211
146.07613028 179.287094096683 18.936055243724
146.10213028 162.666666666667 18.0369990112916
146.12813028 161.909355528117 17.9949634913838
146.15413028 149.958347237467 17.3181030853536
146.18013028 163.159383336371 18.0642953550018
146.20613028 175.441349875303 18.7318632215433
146.23213028 155.276302783115 17.6225028178812
146.25813028 152.062286228188 17.4391677684566
146.28413028 160.642959692484 17.9244503230913
146.31013028 154.084384751201 17.5547363837342
146.33613028 172.245173235121 18.5604511386507
146.36213028 186.211634496871 19.2982711400203
146.38813028 154.10910274111 17.5561443797384
146.41413028 164.670272815258 18.147742163435
146.44013028 170.95971827981 18.4910636946505
146.46613028 171.951872354554 18.5446419407091
146.49213028 175.059620797498 18.711473528159
146.51813028 161.411219484436 17.9672601965039
146.54413028 176.164749773548 18.7704421777191
146.57013028 169.118806384951 18.3912373909398
146.59613028 161.559888161234 17.9755327131762
146.62213028 154.878168157724 17.5998959177447
146.64813028 151.711060043306 17.419016048176
146.67413028 180.745579960838 19.0129208677067
146.70013028 166.434815699407 18.244715163543
146.72613028 158.799933838594 17.8213318154729
146.75213028 171.098613014935 18.498573621495
146.77813028 162.677625708068 18.037606587797
146.80413028 170.118370558087 18.4455073423361
146.83013028 166.881426138282 18.2691776573705
146.85613028 160.140172379282 17.8963779787577
146.88213028 146.874538291944 17.1391095621648
146.90813028 156.99766537633 17.7199133957438
146.93413028 167.326991456238 18.2935503091247
146.96013028 163.419053551087 18.0786644169909
146.98613028 173.975619790127 18.6534511439641
147.01213028 151.807558862284 17.424555022283
147.03813028 153.15863491727 17.5019218897395
147.06413028 165.462355226187 18.1913361370839
147.09013028 169.126449006582 18.3916529440169
147.11613028 167.520663420556 18.3041341461734
147.14213028 165.327008817246 18.1838944573073
147.16813028 178.744674818735 18.9073887577706
147.19413028 177.333542139373 18.8326069432446
147.22013028 177.360455011083 18.8340359461844
147.24613028 166.13692540356 18.2283803670847
147.27213028 165.44260954163 18.1902506602647
147.29813028 173.661771015321 18.6366183099468
147.32413028 174.799254246722 18.6975535430025
147.35013028 168.095494159421 18.3355116732215
147.37613028 166.709132026886 18.2597443589381
147.40213028 168.286262667404 18.3459130417324
147.42813028 164.635897761945 18.1458478866073
147.45413028 165.6717427582 18.2028427866748
147.48013028 173.353939049956 18.6200933966485
147.50613028 174.147832361934 18.6626810700893
147.53213028 170.63867395202 18.4736934018089
147.55813028 156.030692013619 17.6652592403066
147.58413028 160.039864961827 17.8907722003175
147.61013028 166.85380995753 18.2676659679079
147.63613028 154.716519024908 17.5907088558084
147.66213028 158.67567482821 17.814357963632
147.68813028 164.666666666667 18.1475434517549
147.71413028 167.074871935547 18.2797632334528
147.74013028 162.934140874676 18.0518221171535
147.76613028 150.834244713155 17.3686064330536
147.79213028 152.571469209037 17.4683410322238
147.81813028 162.314063937019 18.0174395482277
147.84413028 165.738472066685 18.2065082905364
147.87013028 163.674622497369 18.0927953891801
147.89613028 161.566102771873 17.9758784359415
147.92213028 167.085226568492 18.2803296780168
147.94813028 161.595336701144 17.9775046489297
147.97413028 154.545682997861 17.5809944541178
148.00013028 161.19567051549 17.9552594253322
148.02613028 166.668391379462 18.2575130496715
148.05213028 166.193463158278 18.2314817367255
148.07813028 161.539054570042 17.9743736786594
148.10413028 145.718911470981 17.0715501036655
148.13013028 154.492023748685 17.5779420723067
148.15613028 179.386622404819 18.9413105356952
148.18213028 159.995381128179 17.8882856153506
148.20813028 150.137015006855 17.3284168351789
148.23413028 168.851889151031 18.3767183768502
148.26013028 169.442607834105 18.4088352610427
148.28613028 154.534356719899 17.5803502081101
148.31213028 149.948732343126 17.3175478831806
148.33813028 167.707227727658 18.3143237782703
148.36413028 170.879955341584 18.4867495975677
148.39013028 160.34417696688 17.9077735616061
148.41613028 164.27272352979 18.1258226588362
148.44213028 153.677714457593 17.5315552337831
148.46813028 169.419530693093 18.4075816278561
148.49413028 173.897011878262 18.6492365462108
148.52013028 161.449650079125 17.9693989926834
148.54613028 175.319497493908 18.7253570056172
148.57213028 159.902910101743 17.8831155060712
148.59813028 172.039287211733 18.5493550945435
148.62413028 163.112087973974 18.0616769971104
148.65013028 171.660416480237 18.5289188286979
148.67613028 161.887448450138 17.9937460496773
148.70213028 161.510902191242 17.9728073595219
148.72813028 170.493388197893 18.4658272599899
148.75413028 149.103840943883 17.2686907983137
148.78013028 157.441891195876 17.7449649870534
148.80613028 173.234351611251 18.6136697946026
148.83213028 152.364905301309 17.4565119827134
148.85813028 166.876073267023 18.2688846549002
148.88413028 180.659952904343 19.0084167096759
148.91013028 179.339849294451 18.9388410043725
148.93613028 156.345549479812 17.683073798399
148.96213028 170.303937178642 18.4555648615068
148.98813028 159.082512849661 17.8371809908214
149.01413028 162.488362102006 18.0271108113312
149.04013028 178.425026104229 18.89047517159
149.06613028 163.740345438809 18.096427572248
149.09213028 165.135085282908 18.17333680329
149.11813028 168.99627208737 18.3845735380166
149.14413028 163.898458957772 18.1051627420342
149.17013028 165.722373608922 18.2056240546114
149.19613028 157.730967099531 17.7612481036402
149.22213028 156.666666666667 17.7012240631357
149.24813028 165.327898922678 18.1839434074503
149.27413028 164.954264800629 18.1633843102341
149.30013028 154.511322981414 17.5790399613525
149.32613028 176.642215305221 18.7958620608484
149.35213028 170.865168633192 18.4859497258427
149.37813028 165.400619615894 18.187942138455
149.40413028 165.742119293483 18.206708614875
149.43013028 154.315548062898 17.5678995934572
149.45613028 164.445748082476 18.1353658955355
149.48213028 166.446354815265 18.2453476160508
149.50813028 180.315472262656 18.9902855303787
149.53413028 173.059670556206 18.6042828701461
149.56013028 163.854924759441 18.1027580638664
149.58613028 168.388489657685 18.3514843899715
149.61213028 154.668021818561 17.5879516612118
149.63813028 169.228946657144 18.3972251525682
149.66413028 154.226026219666 17.5628030917428
149.69013028 165.125031383633 18.1727835723443
149.71613028 175.375043918265 18.7283231453467
149.74213028 177.806932444137 18.8577269279273
149.76813028 173.325247674914 18.6185524504411
149.79413028 174.613197154994 18.6876000147153
149.82013028 158.959237105949 17.8302684840105
149.84613028 161.240995929524 17.9577836009639
149.87213028 162.557435568424 18.0309420479588
149.89813028 170.458519732452 18.4639388935542
149.92413028 165.170460963735 18.1752832695249
149.95013028 162.517918157789 18.0287502704868
149.97613028 180.511376155167 19.000598735575
