# Supplementary material for: Properties of a Prototype Corium of Nuclear Reactor
Source: Hindawi journal article supplement (doi:10.1155/2018/5208510), 2018-09-02
Supplement: f1 [file 5208510.f1.zip › 5208510.f1/Tac_2.ASC]

10.01813028 1081
10.04413028 957.240286572697
10.07013028 1052.05523065394
10.09613028 1054
10.12213028 1099.13460899466
10.14813028 1024.01852849554
10.17413028 1004.01207384325
10.20013028 1053.24937340416
10.22613028 1027.54010690089
10.25213028 1065.98147150439
10.27813028 980.823069655773
10.30413028 993.271369540063
10.33013028 1021.54704218154
10.35613028 1053.7433364825
10.38213028 996.862758826095
10.40813028 980.19067510979
10.43413028 1053.02941204506
10.46013028 991.349786623715
10.48613028 975.178601266469
10.51213028 992.04100525988
10.53813028 1001.61087903858
10.56413028 971.334725768534
10.59013028 998.176930344229
10.61613028 1007.22821272931
10.64213028 963.57369625161
10.66813028 998.124331869463
10.69413028 985.061204677662
10.72013028 1029.17525942199
10.74613028 1027.33472576853
10.77213028 1009.02845078812
10.79813028 1050.65152946583
10.82413028 1056.15182140058
10.85013028 1019.28810131748
10.87613028 960.610753242629
10.90213028 938.337357947774
10.92813028 972.594147261157
10.95413028 969.144886119797
10.98013028 934.849368893156
11.00613028 976.196900725272
11.03213028 977.735439944777
11.05813028 968.252841044455
11.08413028 946.527071800562
11.11013028 926.416736288427
11.13613028 974.160679195243
11.16213028 955.348344738215
11.18813028 953.405268869487
11.21413028 965.887741973861
11.24013028 953.802870237924
11.26613028 972.140708814262
11.29213028 970.613385421938
11.31813028 945.410636468761
11.34413028 929.554332294948
11.37013028 960.334977360297
11.39613028 960.54463903904
11.42213028 955.207303646353
11.44813028 978.374769771479
11.47413028 952.889538691982
11.50013028 939.876984220097
11.52613028 925.87746484866
11.55213028 922.585415262314
11.57813028 930.093248902033
11.60413028 930.157795424305
11.63013028 922.005264358482
11.65613028 918.130534929918
11.68213028 896.31417151807
11.70813028 914.934847053409
11.73413028 899.539981105006
11.76013028 888.078668675352
11.78613028 907.542613284246
11.81213028 893.153618118705
11.83813028 894.807528172028
11.86413028 898.366895788779
11.89013028 928.431316515108
11.91613028 919.99450660478
11.94213028 924.789228713224
11.96813028 882.046624451047
11.99413028 899.55757089857
12.02013028 927.920495863403
12.04613028 900.478776427276
12.07213028 888.890499948983
12.09813028 890.627004391617
12.12413028 848.692534725794
12.15013028 869.390791883662
12.17613028 859.588047441554
12.20213028 873.161514656366
12.22813028 905.25284104452
12.25413028 911.119902972099
12.28013028 893.828311459225
12.30613028 824.737133421984
12.33213028 879.753739403581
12.35813028 890.646139311542
12.38413028 871.194142750092
12.41013028 877.008857794722
12.43613028 913.439671126309
12.46213028 847.942262962573
12.48813028 859.565444881269
12.51413028 835.810160351329
12.54013028 833.313816685513
12.56613028 866.143924862804
12.59213028 836.707721376914
12.61813028 876.054395192889
12.64413028 882.984939144818
12.67013028 840.519175262783
12.69613028 886.944185476632
12.72213028 859.925634426065
12.74813028 820.673628842664
12.77413028 873.049508221995
12.80013028 773.723698379049
12.82613028 834.772645286769
12.85213028 806.935076090092
12.87813028 816.719669424356
12.90413028 773.967349351253
12.93013028 761.001670922188
12.95613028 831.181256000735
12.98213028 803.639078234939
13.00813028 841.805754008994
13.03413028 847.301971878871
13.06013028 802.528136298422
13.08613028 808.095881081336
13.11213028 808.542258451572
13.13813028 812.855949341257
13.16413028 817.99701298814
13.19013028 837.158047016068
13.21613028 845.897790062267
13.24213028 821.602021243854
13.26813028 835.271975964446
13.29413028 816.507101419463
13.32013028 825.016983369184
13.34613028 844.86898444158
13.37213028 812.558738637286
13.39813028 826.404078575691
13.42413028 825.396765907382
13.45013028 808.265624553081
13.47613028 817.287036819573
13.50213028 781.763993973758
13.52813028 780.154224543087
13.55413028 828.383524325289
13.58013028 808.63930727168
13.60613028 840.242231641723
13.63213028 866.412788019565
13.65813028 841.00835461114
13.68413028 781.928244050282
13.71013028 834.153789024638
13.73613028 824.753213664976
13.76213028 823.837569196618
13.78813028 816.34366424909
13.81413028 813.323990569856
13.84013028 817.425926360691
13.86613028 775.550967895447
13.89213028 759.737362458779
13.91813028 765.51165611271
13.94413028 766
13.97013028 773.377172913982
13.99613028 792.083452405341
14.02213028 789.840991726933
14.04813028 789.247473445181
14.07413028 793.436329281828
14.10013028 791.150402070052
14.12613028 778.740555952352
14.15213028 755.894219181107
14.17813028 798.384359786411
14.20413028 822.37740195072
14.23013028 788.341032069849
14.25613028 768.873310098086
14.28213028 791.85377523544
14.30813028 752.115348278857
14.33413028 738.646390903304
14.36013028 771.293514026821
14.38613028 803.342244918612
14.41213028 766.166504868122
14.43813028 752.41903619002
14.46413028 791.967120314514
14.49013028 784.706634324033
14.51613028 766.426510230103
14.54213028 721.726478909147
14.56813028 739.715514673777
14.59413028 789.716911449234
14.62013028 768.862255642521
14.64613028 738.094587546739
14.67213028 774.730530418914
14.69813028 760.275569400688
14.72413028 788.02032521361
14.75013028 785.01086099456
14.77613028 755.815779542431
14.80213028 759.008857794671
14.82813028 769.452454634867
14.85413028 726.772267899124
14.88013028 731
14.90613028 736.922795765061
14.93213028 769.887845214719
14.95813028 740.197278112916
14.98413028 782.862736271023
15.01013028 741.372995608381
15.03613028 762.470044428434
15.06213028 748.252257175112
15.08813028 773.068117403427
15.11413028 731.165691962027
15.14013028 734.906167228547
15.16613028 754.460018894943
15.19213028 766.796289789887
15.21813028 758.564838456888
15.24413028 730.735898018207
15.27013028 684.202245769541
15.29613028 770.74816532253
15.32213028 752.482953732875
15.34813028 772.284530436268
15.37413028 711.815505395592
15.40013028 673.048753446764
15.42613028 711.255015150286
15.45213028 707.516314046814
15.47813028 688.673628842666
15.50413028 677.936037347149
15.53013028 701.20479726295
15.55613028 685.382414717439
15.58213028 711.928769788833
15.60813028 732.467434804217
15.63413028 686.163266264452
15.66013028 738.974100705282
15.68613028 724.054853266366
15.71213028 712.383856602892
15.73813028 711
15.76413028 757.008880349749
15.79013028 712.989677764748
15.81613028 717.108561348992
15.84213028 701.787431995163
15.86813028 693.697547492571
15.89413028 704.363428148372
15.92013028 694.542487488365
15.94613028 688.524565417204
15.97213028 650.882455060313
15.99813028 685.815344023979
16.02413028 683.053537176747
16.05013028 699.827040479655
16.07613028 710.31189417151
16.10213028 693.045411602281
16.12813028 676.312603836656
16.15413028 639.083052462727
16.18013028 668.037582729636
16.20613028 674.483663398113
16.23213028 645.142837809978
16.25813028 682.254682872695
16.28413028 693.129447876943
16.31013028 666.628675313859
16.33613028 679.966433204298
16.36213028 701.210645490835
16.38813028 687.928850474665
16.41413028 686.182320498592
16.44013028 700.49193732348
16.46613028 688.821856806916
16.49213028 672.882603411261
16.51813028 634.64012017778
16.54413028 643.28887864779
16.57013028 667.513785108476
16.59613028 657.85523967602
16.62213028 643.411804207536
16.64813028 645.839846543156
16.67413028 674.540106900886
16.70013028 685.699240969835
16.72613028 677.557525788522
16.75213028 673.517194618031
16.77813028 678.266540700032
16.80413028 658.052391993056
16.83013028 692.00718687239
16.85613028 702.43825179583
16.88213028 686.301468695406
16.90813028 671.411849317588
16.93413028 683.278659653404
16.96013028 674.634294504959
16.98613028 654.865139413576
17.01213028 638.698257157725
17.03813028 630.962943008915
17.06413028 636.421645814289
17.09013028 646.710227760275
17.11613028 655.038498876587
17.14213028 663.938085657033
17.16813028 661.517001157073
17.19413028 629.830130732288
17.22013028 634.7484750451
17.24613028 634.241602662319
17.27213028 636.158401848686
17.29813028 649.313839240536
17.32413028 665.688644587798
17.35013028 609.240183331757
17.37613028 624.080088005892
17.40213028 614.361379838537
17.42813028 604.073507557791
17.45413028 586.431064923347
17.48013028 571.959852756196
17.50613028 601.54612603466
17.53213028 643.158734126195
17.55813028 618.612675756699
17.58413028 623.450451435033
17.61013028 625.665022639704
17.63613028 614.463841367975
17.66213028 615.354776835409
17.68813028 577.041863276092
17.71413028 605.772061417325
17.74013028 643.974491113691
17.76613028 591.078920267175
17.79213028 615.132938072422
17.81813028 618.487131038475
17.84413028 596.82593087175
17.87013028 584.201123140921
17.89613028 641.625630171189
17.92213028 620.36029278557
17.94813028 615.131496186921
17.97413028 627.529120110447
18.00013028 630.861568532358
18.02613028 590.410842950536
18.05213028 594.538081146028
18.07813028 555.264160112552
18.10413028 604.10751940613
18.13013028 608.095755285455
18.15613028 605.31703273411
18.18213028 602.346799611855
18.20813028 550.405807628795
18.23413028 581.904999489833
18.26013028 606.801931536013
18.28613028 599.0187575322
18.31213028 582.808592669948
18.33813028 584.949198243352
18.36413028 574.590782861653
18.39013028 625.936459844838
18.41613028 616.737214107874
18.44213028 577.237380246589
18.46813028 578.078313842795
18.49413028 571.050675960766
18.52013028 568.755410325821
18.54613028 571.981952132958
18.57213028 564.908776852763
18.59813028 575.061582065374
18.62413028 587.872932710362
18.65013028 547.946269362304
18.67613028 571.752594219888
18.70213028 570.107325945253
18.72813028 569.788415807188
18.75413028 550.020051066877
18.78013028 564.247496000207
18.80613028 532.115177372856
18.83213028 524.181256000731
18.85813028 545.901989922946
18.88413028 563.480469904538
18.91013028 546.950114390303
18.93613028 535.579921867094
18.96213028 562.0559854293
18.98813028 541.507411142013
19.01413028 518.535094134167
19.04013028 516.987319732296
19.06613028 541.993235625209
19.09213028 564.925760221948
19.11813028 538.167317774216
19.14413028 528.449157900438
19.17013028 548.102942157865
19.19613028 559.974307186997
19.22213028 545.499662955275
19.24813028 512.105174394513
19.27413028 514.368234433424
19.30013028 529.795809161386
19.32613028 564.064636742222
19.35213028 587.353563986654
19.37813028 548.012531916798
19.40413028 539.762471402424
19.43013028 535.613008034293
19.45613028 522
19.48213028 516.952288496069
19.50813028 519.97253302383
19.53413028 539.473763660556
19.56013028 536.622220661637
19.58613028 525.954211010072
19.61213028 522.306629813028
19.63813028 518.342496510374
19.66413028 524.97073630578
19.69013028 547.251421713968
19.71613028 541.359892842992
19.74213028 523.125005958908
19.76813028 571.904931824761
19.79413028 539.154408469779
19.82013028 517.112532172924
19.84613028 535.526317025272
19.87213028 517.648713359905
19.89813028 555.950365982068
19.92413028 537.682360841508
19.95013028 526.919157218821
19.97613028 508.794286590052
20.00213028 521.165772647858
20.02813028 484.803305756439
20.05413028 459.649777857768
20.08013028 505.483856859064
20.10613028 534.834801687239
20.13213028 460.078026675245
20.15813028 522.005928913673
20.18413028 483.926137609591
20.21013028 494.686160759464
20.23613028 475.640965173085
20.26213028 540.465947808671
20.28813028 506.855971896279
20.31413028 527.363050760776
20.34013028 517.1745046467
20.36613028 489.662058182869
20.39213028 502.861110458813
20.41813028 523.155414836826
20.44413028 526.434110066017
20.47013028 454.708018078725
20.49613028 516.948672504804
20.52213028 478.335641915485
20.54813028 478
20.57413028 494.516336601887
20.60013028 432.494250245825
20.62613028 498.522733123293
20.65213028 471.862965307814
20.67813028 505.410681578872
20.70413028 517.219377489677
20.73013028 493.375582677575
20.75613028 490.097906836195
20.78213028 447.175798181232
20.80813028 494.052666139841
20.83413028 459.12833826913
20.86013028 484.908947758694
20.88613028 481.475182991034
20.91213028 458.936014792123
20.93813028 482.477024819205
20.96413028 464.963984951684
20.99013028 509.580344364783
21.01613028 469.616304768727
21.04213028 462.550635617849
21.06813028 455.38671781892
21.09413028 453.773103360244
21.12013028 490.632691247792
21.14613028 513.298881626142
21.17213028 470.913138085059
21.19813028 467.468041228597
21.22413028 446.677783593243
21.25013028 480.527745890022
21.27613028 480.408817195678
21.30213028 485.487050352644
21.32813028 476.640142732732
21.35413028 472.695521737712
21.38013028 499.894367532012
21.40613028 488.800673577199
21.43213028 487.594044020299
21.45813028 471.803305756439
21.48413028 463.994151772098
21.51013028 468.843040036815
21.53613028 482.692912113494
21.56213028 503.484543969281
21.58813028 532.46029304178
21.61413028 527.461644707187
21.64013028 522.60049867252
21.66613028 516.684489837156
21.69213028 460.229187007148
21.71813028 448.748416914292
21.74413028 473.575138137113
21.77013028 481.181485037472
21.79613028 470.833553262684
21.82213028 451.533045824283
21.84813028 449.941427501451
21.87413028 456.754345827963
21.90013028 444.776045262057
21.92613028 438.21210993136
21.95213028 449.097655244433
21.97813028 460.429816498798
22.00413028 471.076952643125
22.03013028 446.681983453805
22.05613028 436.217935604175
22.08213028 444.73295611644
22.10813028 458.861339495619
22.13413028 460.485460116236
22.16013028 449.337106356012
22.18613028 438.010860994557
22.21213028 434.543116467712
22.23813028 453.413062166352
22.26413028 454.649790878593
22.29013028 420.149898886582
22.31613028 426.883735574193
22.34213028 445.3140006122
22.36813028 431.763351973594
22.39413028 448.535507097536
22.42013028 421.608395210241
22.44613028 423.885648553932
22.47213028 399.844423791507
22.49813028 436.067510979045
22.52413028 415.63573639046
22.55013028 422.090203759364
22.57613028 458.056879021227
22.60213028 438.059740237206
22.62813028 417.43693570621
22.65413028 416.066594832092
22.68013028 420.664312974466
22.70613028 420.263369761485
22.73213028 423.596024665053
22.75813028 407.037685970491
22.78413028 428.947549876137
22.81013028 443.797789806197
22.83613028 407.057885388274
22.86213028 425.47581197044
22.88813028 439.973116893259
22.91413028 448.114970891154
22.94013028 425.519655891342
22.96613028 420.643552242348
22.99213028 444.024663890932
23.01813028 387.204464985399
23.04413028 417.173588499749
23.07013028 422.087562045923
23.09613028 375.47251523595
23.12213028 426.956556021715
23.14813028 386.44106790176
23.17413028 442.800557315584
23.20013028 418.79566081048
23.22613028 406.486295577354
23.25213028 434.486592279167
23.27813028 420.965907465749
23.30413028 438.594169816122
23.33013028 401.36897967445
23.35613028 382.532313604021
23.38213028 419.697489361762
23.40813028 406.199613590347
23.43413028 415.441261362714
23.46013028 387.414058999137
23.48613028 447.518933205283
23.51213028 440.993396996876
23.53813028 405.224093554589
23.56413028 400.660971129986
23.59013028 420.693518537879
23.61613028 403.112693544588
23.64213028 406.807905559678
23.66813028 382.903718975996
23.69413028 384.589615122937
23.72013028 421.692831427663
23.74613028 393.187494636976
23.77213028 402.782109505874
23.79813028 410
23.82413028 381.480757072034
23.85013028 396.246912130846
23.87613028 400.308655567888
23.90213028 385.373076294216
23.92813028 396.597763252421
23.95413028 397.183488237307
23.98013028 402.732475487941
24.00613028 390.454835222294
24.03213028 398.948991761639
24.05813028 395.802721887083
24.08413028 379.519404299578
24.11013028 390.175052940276
24.13613028 390.817073077026
24.16213028 394.636365369867
24.18813028 394.484144026561
24.21413028 394.076997753174
24.24013028 376.389785516613
24.26613028 377.314926293418
24.29213028 391.657984118126
24.31813028 392.457260919873
24.34413028 389.335916062272
24.37013028 386.999999999948
24.39613028 391.61674982144
24.42213028 398.515249549003
24.44813028 395.082468593371
24.47413028 374.503840260874
24.50013028 367.51909457701
24.52613028 381.170246655219
24.55213028 374.66403882768
24.57813028 382.28877540694
24.60413028 400.328122765407
24.63013028 386.457970585111
24.65613028 381.345002893734
24.68213028 381.826788887895
24.70813028 373.788954566448
24.73413028 360.375753583503
24.76013028 372.366540956161
24.78613028 385.28275627317
24.81213028 393.395198226
24.83813028 388.098639056458
24.86413028 384.971984730328
24.89013028 366.351102713286
24.91613028 364.056420947749
24.94213028 371.442725803237
24.96813028 374.435048767989
24.99413028 338.542784190177
25.02013028 360.824511541273
25.04613028 373.861510401553
25.07213028 392.270340617937
25.09813028 370.498585436653
25.12413028 407.353963929315
25.15013028 393.216197016863
25.17613028 367.52137192363
25.20213028 381.946188676468
25.22813028 376.736423756802
25.25413028 383.91819596177
25.28013028 367.404914036867
25.30613028 374.331383924053
25.33213028 380.51732041391
25.35813028 407.479405406681
25.38413028 419.825198651488
25.41013028 402.345919040687
25.43613028 381.643219964703
25.46213028 414.66451945618
25.48813028 394.32634860231
25.51413028 385.49690498015
25.54013028 359.763913287926
25.56613028 368.135902529257
25.59213028 357.809495796089
25.61813028 386.694515370664
25.64413028 360.330319426195
25.67013028 369.401697988268
25.69613028 383.291981921275
25.72213028 342.208058421642
25.74813028 371.910389644195
25.77413028 365.090365131092
25.80013028 351.319642358279
25.82613028 368.410429987109
25.85213028 377.615914360321
25.87813028 369.473386272914
25.90413028 382.124709257105
25.93013028 378.362215299656
25.95613028 358.729672402768
25.98213028 386.954507711834
26.00813028 350.497237257747
26.03413028 368.196694243559
26.06013028 360.46465427407
26.08613028 352.923837707945
26.11213028 386.324035679906
26.13813028 358.072856023357
26.16413028 393.91281534167
26.19013028 362.239967315866
26.21613028 341.723824174932
26.24213028 355.169788581793
26.26813028 371.777074184129
26.29413028 356.072523745764
26.32013028 345.548942140586
26.34613028 354.763203622638
26.37213028 361.794389830909
26.39813028 357.757310284799
26.42413028 341.219332379628
26.45013028 341.103777619059
26.47613028 339.404056020723
26.50213028 342.964865522917
26.52813028 350.594753685491
26.55413028 356.447109590553
26.58013028 353.243502621297
26.60613028 374.435206653161
26.63213028 360.933108466097
26.65813028 357.745991216764
26.68413028 346.364928164684
26.71013028 345.818434276694
26.73613028 353.479863480158
26.76213028 355.610043577458
26.78813028 378.804608825299
26.81413028 359.178259454612
26.84013028 362.853281586237
26.86613028 372.73362067158
26.89213028 369.4834569164
26.91813028 374.101019643937
26.94413028 367.431774588584
26.97013028 371.0826394993
26.99613028 378.958514111553
27.02213028 380.554103258211
27.04813028 360.45957384223
27.07413028 348.310497396055
27.10013028 379.685312277582
27.12613028 395.875290742896
27.15213028 379.775816225318
27.17813028 384.795041365338
27.20413028 402.675906189287
27.23013028 411.786057774677
27.25613028 451.29120110446
27.28213028 459.65774554713
27.30813028 444.092148828456
27.33413028 486.010322235251
27.36013028 493.127044734533
27.38613028 471.586560446002
27.41213028 458.343835154957
27.43813028 473.745407347406
27.46413028 508.186358987549
27.49013028 536.036760289275
27.51613028 523.346615685166
27.54213028 546.436122800114
27.56813028 570.634887908582
27.59413028 604.026986347518
27.62013028 608.391259491398
27.64613028 644.273601776638
27.67213028 647.656196934265
27.69813028 708.090913424664
27.72413028 739.287562558175
27.75013028 770.154876077408
27.77613028 835.591830852253
27.80213028 967.015873761278
27.82813028 966.974397407096
27.85413028 1030.87718721538
27.88013028 1122.21785491834
27.90613028 1163.37668879899
27.93213028 1309.41323911986
27.95813028 1528.20522929495
27.98413028 1654.469385921
28.01013028 1862.86867123251
28.03613028 2040.97638061317
28.06213028 2399.91375311847
28.08813028 2902.30081879702
28.11413028 3685.0702175813
28.14013028 5324.68345863546
28.16613028 9774.3145208662
28.19213028 18103.6421568883
28.21813028 20090.9726448066
28.24413028 14749.0303872481
28.27013028 14128.4323867783
28.29613028 9863.48809549875
28.32213028 5332.76436993981
28.34813028 2965.4415061959
28.37413028 1608.04496932524
28.40013028 1174.52135029382
28.42613028 972.996629552723
28.45213028 878.246205952103
28.47813028 665.817273510961
28.50413028 646.547500254996
28.53013028 583.333045312033
28.55613028 511.445406579029
28.58213028 473.042608517115
28.60813028 487.205655279139
28.63413028 470.191591256743
28.66013028 410.428445764811
28.68613028 448.541284173859
28.71213028 456.731743267678
28.73813028 439.025063833596
28.76413028 431.769864756621
28.79013028 384.178133658725
28.81613028 400.611656368891
28.84213028 412.530081367392
28.86813028 409.161972729904
28.89413028 399.239428556555
28.92013028 408.797399397793
28.94613028 387.149727980652
28.97213028 369.266918087677
28.99813028 346.325113198522
29.02413028 354.189278334289
29.05013028 366.368818302782
29.07613028 375.542635839269
29.10213028 390.189633166956
29.12813028 375.907896281597
29.15413028 366.605614680096
29.18013028 378.370866612668
29.20613028 359.615469307554
29.23213028 341.325742177928
29.25813028 351.807573282137
29.28413028 380.370179502452
29.31013028 418.14401508296
29.33613028 436.766419671285
29.36213028 442.706885915796
29.38813028 446.215784053375
29.41413028 429.06090797592
29.44013028 406.41514605202
29.46613028 397.265624553081
29.49213028 388.613362866913
29.51813028 360.110496883803
29.54413028 335.419700745263
29.57013028 345.076207402055
29.59613028 342.67310310412
29.62213028 328.481408606517
29.64813028 333.086691009018
29.67413028 337.00250638336
29.70013028 345.287665799035
29.72613028 359.310120008365
29.75213028 366.813879583452
29.77813028 362.196020154105
29.80413028 353.898270690824
29.83013028 346.215738943387
29.85613028 342.297942924234
29.88213028 346.128841452655
29.90813028 322.85049152178
29.93413028 313.784764240135
29.96013028 336.116812719381
29.98613028 339.860962107977
30.01213028 335.041943961924
30.03813028 334.318016546135
30.06413028 325.554116278972
30.09013028 310.979535969648
30.11613028 329.457422291538
30.14213028 319.68713155073
30.16813028 347.726204762409
30.19413028 329.393378952854
30.22013028 319.517194618031
30.24613028 323.184026996614
30.27213028 313.149908420802
30.29813028 344.878587477329
30.32413028 320.253447468902
30.35013028 331.704550438364
30.37613028 352.075636553506
30.40213028 334.139702447214
30.42813028 317.211000323454
30.45413028 319.809702277809
30.48013028 327.573467214873
30.50613028 330.181233445709
30.53213028 329.629510774978
30.55813028 318.965278486346
30.58413028 299.514665679647
30.61013028 306.159924420019
30.63613028 299.080281466804
30.66213028 327.216996902199
30.68813028 336.894219181106
30.71413028 342.675883634263
30.74013028 330.172604687724
30.76613028 324.5423261167
30.79213028 348.890971043177
30.81813028 297.118986825145
30.84413028 314.78365463223
30.87013028 328.195894358225
30.89613028 310.356389626841
30.92213028 321.382104994867
30.94813028 338
30.97413028 337.986839103751
31.00013028 333.036450566659
31.02613028 322.189336465147
31.05213028 291.841175653621
31.07813028 302.555316106974
31.10413028 319.20135217766
31.13013028 305.853523643729
31.15613028 300.334119344151
31.18213028 323.081345964662
31.20813028 325
31.23413028 320.482953732875
31.26013028 309.27815646988
31.28613028 380.452302797466
31.31213028 356.801589724152
31.33813028 358.04604058169
31.36413028 361.561393371502
31.39013028 378.033634460772
31.41613028 354.313497428679
31.44213028 339.111629046734
31.46813028 334.557674139428
31.49413028 334
31.52013028 341.942640350276
31.54613028 313.410672044563
31.57213028 294.932547151764
31.59813028 294.293491471848
31.62413028 279.153927841275
31.65013028 329.10429033685
31.67613028 302.446722668643
31.70213028 290.348847921739
31.72813028 281.276714584339
31.75413028 293.214158241243
31.78013028 311.120657747385
31.80613028 297.50179195099
31.83213028 300.478340908823
31.85813028 283.380676130127
31.88413028 299.52478143314
31.91013028 289.473673440464
31.93613028 304.59783091749
31.96213028 302.858033226928
31.98813028 295.078313842795
32.01413028 306.691847615636
32.04013028 321.937272750938
32.06613028 320.96924931023
32.09213028 320.031815187629
32.11813028 309.980819970027
32.14413028 317.796128418225
32.17013028 321.075865590159
32.19613028 320.044266418592
32.22213028 331.210897082597
32.24813028 327.769842201598
32.27413028 320.493482449838
32.30013028 332.414881439495
32.32613028 347.92003778999
32.35213028 367.686273534583
32.37813028 393.469254077364
32.40413028 402.456906087254
32.43013028 434.735849421718
32.45613028 475.311184506271
32.48213028 487.678480237723
32.50813028 523.278062763139
32.53413028 593.322167810205
32.56013028 655.576350985874
32.58613028 674.1733013322
32.61213028 774.658354532737
32.63813028 1112.5942651588
32.66413028 1930.84201090012
32.69013028 2737.30897831122
32.71613028 2274.4450354534
32.74213028 1492.75912607145
32.76813028 1595.79939911115
32.79413028 1402.13905624971
32.82013028 719.188488908435
32.84613028 477.553464744537
32.87213028 424.207465017906
32.89813028 384.408075441167
32.92413028 347.28299484417
32.95013028 383.064330506238
32.97613028 336.876139224777
33.00213028 303.004267525691
33.02813028 326.280891889977
33.05413028 310.284965954721
33.08013028 300
33.10613028 299.054979062247
33.13213028 284.971413881728
33.15813028 246.781341709835
33.18413028 286.751610407866
33.21013028 296.746575086123
33.23613028 300.024250927421
33.26213028 292.705295679389
33.28813028 281.250392791973
33.31413028 265.933163110409
33.34013028 303.906225359358
33.36613028 286.795625234697
33.39213028 303.562538555244
33.41813028 285.671203145138
33.44413028 270.520604127579
33.47013028 309.098342354646
33.49613028 290.875245632849
33.52213028 265.391385287288
33.54813028 309.247967094444
33.57413028 273.135237973992
33.60013028 286.010573827006
33.62613028 307.792283390214
33.65213028 255.045653659782
33.67813028 246.234289993955
33.70413028 277.70611811975
33.73013028 289.459560821518
33.75613028 249.539284460524
33.78213028 267.482540769446
33.80813028 282.816534317719
33.83413028 255.753420146747
33.86013028 287.247792702022
33.88613028 271.390620977733
33.91213028 245.201845826916
33.93813028 291.674977021575
33.96413028 286.938040546904
33.99013028 280.741768801118
34.01613028 280.841723947195
34.04213028 310.113057911467
34.06813028 290.521739777011
34.09413028 280.940214652748
34.12013028 307.269182413538
34.14613028 324.297462295735
34.17213028 339.51504306729
34.19813028 342.227732100876
34.22413028 329.802470295321
34.25013028 323.742730058117
34.27613028 337.850020427586
34.30213028 381.094093897489
34.32813028 386.328122765302
34.35413028 420.062175468991
34.38013028 417.429703723682
34.40613028 423.164901610955
34.43213028 415.340654682208
34.45813028 384.097335987599
34.48413028 354.095687620386
34.51013028 347.61280155258
34.53613028 339.994106662114
34.56213028 347.667116059637
34.58813028 341.284462771191
34.61413028 306.005506415977
34.64013028 293.828711401898
34.66613028 308.873332653025
34.69213028 333.344841522067
34.71813028 298.520414153138
34.74413028 288.81158921607
34.77013028 292.488631054789
34.79613028 310.467089505862
34.82213028 314.634684913367
34.84813028 296.524210584584
34.87413028 313.971513636088
34.90013028 315.877752016205
34.92613028 310.899986723112
34.95213028 332.59755677071
34.97813028 343.152405269942
35.00413028 343.717414632759
35.03013028 331.62883668543
35.05613028 302.213690633507
35.08213028 310.440767713454
35.10813028 328.925234483401
35.13413028 320.490392197122
35.16013028 327.646287662447
35.18613028 322.329038912358
35.21213028 313.705969768841
35.23813028 322.246238041394
35.26413028 322.943624162299
35.29013028 339.26637932837
35.31613028 361.515591360862
35.34213028 385.643129744657
35.36813028 385.515294658944
35.39413028 410.686170293724
35.42013028 438.753281330103
35.44613028 458.319903484349
35.47213028 493.718982314139
35.49813028 506.866145780624
35.52413028 541.493249926611
35.55013028 629.504694790517
35.57613028 694.6668870229
35.60213028 725.95138188338
35.62813028 792.068388063729
35.65413028 881.546180678968
35.68013028 941.69284444842
35.70613028 941.003270692912
35.73213028 965.709157214393
35.75813028 850.268831067428
35.78413028 803.663935586823
35.81013028 779.09222346654
35.83613028 664.6045666895
35.86213028 544.275882609771
35.88813028 452.143331459241
35.91413028 408.830292104043
35.94013028 382.313142596058
35.96613028 355.610159839068
35.99213028 313.860813757071
36.01813028 302.854781602544
36.04413028 312.254363615855
36.07013028 300.958469001501
36.09613028 285.342335138626
36.12213028 311.087562045923
36.14813028 288
36.17413028 288.363473258468
36.20013028 308.008251370342
36.22613028 308.99832907776
36.25213028 310.976813570357
36.27813028 295.344248118447
36.30413028 289.188626799908
36.33013028 307.214158241245
36.35613028 309.897435229704
36.38213028 317.510362578166
36.40813028 304.066904554664
36.43413028 293.810492628924
36.46013028 315.725711113069
36.48613028 295.522346201395
36.51213028 302.781022452991
36.53813028 295.207384332189
36.56413028 267.919821774011
36.59013028 270.875335852943
36.61613028 278.795957512292
36.64213028 280.839572396455
36.66813028 261.08839750704
36.69413028 222.571431925752
36.72013028 245.772609710987
36.74613028 289.794628401909
36.77213028 272.141328259401
36.79813028 249.399227180694
36.82413028 238.068952864481
36.85013028 216.995148604953
36.87613028 251.514675213905
36.90213028 270.182446294473
36.92813028 278.573844602516
36.95413028 269.471921832386
36.98013028 240.129609248705
37.00613028 243.312545705942
37.03213028 253.144428046386
37.05813028 243.426132842457
37.08413028 252.759655296493
37.11013028 250.085433050204
37.13613028 255.416781398475
37.16213028 241.766203655302
37.18813028 243.624085044763
37.21413028 262.183075273877
37.24013028 264.109122663375
37.26613028 263.405749497987
37.29213028 248.43757770638
37.31813028 248.050262997337
37.34413028 231.989839136412
37.37013028 224.673215879238
37.39613028 230.240870442055
37.42213028 241.005686856174
37.44813028 239.232448165781
37.47413028 229.566177101532
37.50013028 239.194187860203
37.52613028 242.480069961807
37.55213028 251.784180370779
37.57813028 260.21156163779
37.60413028 229.90517388226
37.63013028 229.826466144554
37.65613028 275.030692558961
37.68213028 264.996477715335
37.70813028 246.579302421952
37.73413028 260.657458379579
37.76013028 257.780793416253
37.78613028 263.179059339946
37.81213028 258.606930769717
37.83813028 255.701118373788
37.86413028 258.344818967046
37.89013028 266.456883532157
37.91613028 252.458738381163
37.94213028 240.151866510632
37.96813028 252.334748323556
37.99413028 259.265292275486
38.02013028 270.273817792612
38.04613028 275.798247879672
38.07213028 258.469231522337
38.09813028 268.530252273379
38.12413028 278.697960456001
38.15013028 266.753429681012
38.17613028 284.574828414541
38.20213028 289.696015386969
38.22813028 256.736310981682
38.25413028 232.551219487144
38.28013028 232.286807782889
38.30613028 235.568180301368
38.33213028 234.670961087641
38.35813028 258.61752715175
38.38413028 272.533184640923
38.41013028 242
38.43613028 241.535197375024
38.46213028 241.900238314874
38.48813028 260.756165101109
38.51413028 273.627175297547
38.54013028 280.274953442036
38.56613028 246.317100399183
38.59213028 266.286201358435
38.61813028 266.264698871872
38.64413028 237.075555867673
38.67013028 239.640839377271
38.69613028 262.05290819734
38.72213028 245.587899090651
38.74813028 237.57386715754
38.77413028 253.207555238118
38.80013028 261.192265346197
38.82613028 273.030499098008
38.85213028 277.9808876351
38.87813028 278
38.90413028 268.236670581432
38.93013028 275.731285194203
38.95613028 260.696186292902
38.98213028 281.771019474504
39.00813028 266.140412112456
39.03413028 273.340493310539
39.06013028 251.080020340823
39.08613028 253.534384468928
39.11213028 240.545680981941
39.13813028 254.079549246582
39.16413028 264.771100160408
39.19013028 246.921870083895
39.21613028 223.425629658931
39.24213028 226.778745106369
39.26813028 245.58583776001
39.29413028 220.037550640344
39.32013028 241.797592858754
39.34613028 283.536774590596
39.37213028 234.563319372051
39.39813028 253.087994077872
39.42413028 254.999016187975
39.45013028 272.199119941083
39.47613028 299.983232646794
39.50213028 264.357147888631
39.52813028 253.690989599494
39.55413028 272.478615055608
39.58013028 257.449399957933
39.60613028 251.833724168615
39.63213028 248.808947502565
39.65813028 252.508691655926
39.68413028 271.966604110156
39.71013028 245.225422664967
39.73613028 241.835211164163
39.76213028 245.106616280013
39.78813028 269.197974757391
39.81413028 282.741894596997
39.84013028 282.61913040892
39.86613028 292.74732986141
39.89213028 273.829995402231
39.91813028 240.497821127101
39.94413028 242.906589726238
39.97013028 251.291443161965
39.99613028 250
40.02213028 240.655535865573
40.04813028 242.175785160471
40.07413028 250
40.10013028 235.442590473101
40.12613028 237.299555715663
40.15213028 241.998742041187
40.17813028 222.68732849818
40.20413028 225.485676132215
40.23013028 243.232664181762
40.25613028 246.158505089543
40.28213028 233.189165559217
40.30813028 234.53746170089
40.33413028 243.957256152741
40.36013028 234.10342278644
40.38613028 224.67713205881
40.41213028 226.240318661926
40.43813028 244.445222652341
40.46413028 229.904976934807
40.49013028 242.647900453874
40.51613028 258.277698396403
40.54213028 259.458599564516
40.56813028 256.832569450661
40.59413028 243.662767848107
40.62013028 254.643848944161
40.64613028 268.146134544407
40.67213028 241.236935193953
40.69813028 223.334232119278
40.72413028 240.646323238231
40.75013028 232.708853539783
40.77613028 253.762413271611
40.80213028 267.983955332793
40.82813028 250.137918749861
40.85413028 222.982922924222
40.88013028 255.555522588688
40.90613028 244.021128585495
40.93213028 213.274217735279
40.95813028 236.460225376709
40.98413028 226.714108364065
41.01013028 211.827372757252
41.03613028 217.508198006663
41.06213028 247.333216217957
41.08813028 227.714301825018
41.11413028 230.404743130877
41.14013028 222.091268257284
41.16613028 237.678560923551
41.19213028 242.174630442583
41.21813028 235.279746706286
41.24413028 237.500040342916
41.27013028 232.513830218526
41.29613028 239.380892146105
41.32213028 243.17896911985
41.34813028 211.392736952689
41.37413028 219.359412214487
41.40013028 202.617914073667
41.42613028 268.500659788059
41.45213028 233.142137679009
41.47813028 268.784935146068
41.50413028 263.09537789774
41.53013028 240.593828004327
41.55613028 256.392404675091
41.58213028 233.141579851166
41.60813028 246.166217700575
41.63413028 280.641719948447
41.66013028 254.338332225537
41.68613028 241.938876008102
41.71213028 230.143295883456
41.73813028 277.319364725051
41.76413028 276.805834694825
41.79013028 241.876619853271
41.81613028 252.570651108943
41.84213028 271.24716372254
41.86813028 284.987490638223
41.89413028 267.788806215594
41.92013028 286.284369064597
41.94613028 304.862220066788
41.97213028 329.748565265192
41.99813028 315.110496883803
42.02413028 306.071710839668
42.05013028 329.823537263511
42.07613028 327.81024103716
42.10213028 334.826582406181
42.12813028 365.600840484385
42.15413028 367.639536308416
42.18013028 333.050540630612
42.20613028 341.769851735768
42.23213028 324.573938309111
42.25813028 320.963571988319
42.28413028 328.118609437503
42.31013028 305.645545907926
42.33613028 278.001832293905
42.36213028 264.746655771955
42.38813028 259.413017056303
42.41413028 267.552351650136
42.44013028 251.685360874127
42.46613028 242.701873149076
42.49213028 250.46350909038
42.51813028 225.93468916823
42.54413028 212.284907823912
42.57013028 216.577289687795
42.59613028 234.588389253409
42.62213028 248
42.64813028 234.311929747297
42.67413028 234.28961086806
42.70013028 246.11071289978
42.72613028 213.310352531645
42.75213028 199.282011032145
42.77813028 226.958226944007
42.80413028 229.68016418072
42.83013028 222
42.85613028 217.7866997749
42.88213028 219.873332653111
42.90813028 227.103400231354
42.93413028 220.739468899472
42.96013028 216.570731794775
42.98613028 225.02239607857
43.01213028 223.010564292747
43.03813028 220.365898955993
43.06413028 231.334806454365
43.09013028 238.396065776405
43.11613028 249.087745972609
43.14213028 225.923002246826
43.16813028 224
43.19413028 225.35661866358
43.22013028 231.621556106448
43.24613028 229.740007658779
43.27213028 218.972245856294
43.29813028 229.117638646245
43.32413028 206.868629608961
43.35013028 218.786731864181
43.37613028 245.078794471295
43.40213028 238.907828616529
43.42813028 214.748978228624
43.45413028 218.080546079367
43.48013028 218.900283424923
43.50613028 235.837559662352
43.53213028 219.254121558357
43.55813028 233.993935756179
43.58413028 212.667758059802
43.61013028 211.149153645563
43.63613028 228.806670155884
43.66213028 223.160553399426
43.68813028 222.493688931554
43.71413028 214.984961699842
43.74013028 219.953707826549
43.76613028 215.417284581999
43.79213028 233.332825809555
43.81813028 236.202039287874
43.84413028 236.815734432384
43.87013028 225.974100705284
43.89613028 235.218680845194
43.92213028 212.245321894442
43.94813028 216.873939077494
43.97413028 232.543655227019
44.00013028 222.189381575194
44.02613028 228.367902155827
44.05213028 244.941404946487
44.07813028 240.043121234899
44.10413028 263.804986212945
44.13013028 209.010680554371
44.15613028 225.496537126772
44.18213028 251.976903790452
44.20813028 229.195368619673
44.23413028 248.72978517789
44.26013028 222.029779898503
44.28613028 229.224183774682
44.31213028 228.175007830226
44.33813028 243.343754469186
44.36413028 228.932273004914
44.39013028 255.247334628541
44.41613028 244.162282452477
44.44213028 257.531923195618
44.46813028 271.088510282162
44.49413028 287.331680625865
44.52013028 295.831824209637
44.54613028 285.475263676866
44.57213028 283.813273159071
44.59813028 289.623456065425
44.62413028 293.380285721723
44.65013028 287.731949749391
44.67613028 271.301904213856
44.70213028 283.800557315508
44.72813028 279.955127157028
44.75413028 280.719085554998
44.78013028 245.305259079106
44.80613028 240.687670310037
44.83213028 245.42810046651
44.85813028 249.520639703366
44.88413028 265.578318609929
44.91013028 244.628665779595
44.93613028 225.930750433642
44.96213028 216.35561229653
44.98813028 216.927098866593
45.01413028 232.53647788886
45.04013028 217.151811866314
45.06613028 225.866236000659
45.09213028 245.763100381829
45.11813028 230.643039524568
45.14413028 210.265224610414
45.17013028 223.136873320517
45.19613028 235.424861862887
45.22213028 218.043524664071
45.24813028 228.877622733829
45.27413028 256.725940149885
45.30013028 247.401082029622
45.32613028 237.729740067844
45.35213028 223.953846643187
45.37813028 217.619323869877
45.40413028 224.033921628319
45.43013028 233.603450108535
45.45613028 244.668593520923
45.48213028 230.748155788265
45.50813028 218.543929373866
45.53413028 224.692225003281
45.56013028 227.329061467385
45.58613028 223.8367337355
45.61213028 241.075062218409
45.63813028 255.967704183871
45.66413028 257.758442447729
45.69013028 256.881093860685
45.71613028 248.520307425771
45.74213028 250.131680113609
45.76813028 237.502066097711
45.79413028 236.816179485096
45.82013028 250.740062303092
45.84613028 274.793667144905
45.87213028 285.265134390316
45.89813028 265.530252273375
45.92413028 272.648348993091
45.95013028 258.27565008652
45.97613028 256.219754877321
46.00213028 269.75886494542
46.02813028 292.545748647012
46.05413028 286.348793277427
46.08013028 266.602350034959
46.10613028 305.4049947227
46.13213028 300.43587120827
46.15813028 301.167946753625
46.18413028 304.93318566543
46.21013028 323.779732404902
46.23613028 289.882132317021
46.26213028 315.148434446055
46.28813028 312.969681342183
46.31413028 351.187836448836
46.34013028 354.397511148406
46.36613028 336.63085895389
46.39213028 364.676045005929
46.41813028 339.129676913774
46.44413028 333.581889491145
46.47013028 353.158856435675
46.49613028 401.337613025937
46.52213028 348.727530386292
46.54813028 373.893725531839
46.57413028 404
46.60013028 404.668683741016
46.62613028 420.794115684122
46.65213028 415.305813420425
46.67813028 481.153079359396
46.70413028 496.994322678092
46.73013028 510.856120247187
46.75613028 554.111225617576
46.78213028 674.295029625218
46.80813028 814.313751581736
46.83413028 1108.81024615972
46.86013028 1784.89832255911
46.88613028 2397.20593013663
46.91213028 2140.91328131343
46.93813028 1660.73807746105
46.96413028 1313.45812683424
46.99013028 1356.58299561254
47.01613028 1434.68505719933
47.04213028 1174.96749257965
47.06813028 829.439759710346
47.09413028 582.611899351634
47.12013028 428.593834977306
47.14613028 370.268453679775
47.17213028 326.874068359865
47.19813028 293.855230141748
47.22413028 276.78320957944
47.25013028 267.669783814662
47.27613028 251.935614849459
47.30213028 285.800189462203
47.32813028 264.255063746835
47.35413028 245.732533618749
47.38013028 264.508301247519
47.40613028 269.073026929289
47.43213028 241.292623921443
47.45813028 240.254682872691
47.48413028 253.125693069129
47.51013028 248.00329673443
47.53613028 226.264573075984
47.56213028 229.427561707203
47.58813028 236.986861658756
47.61413028 234.738175364875
47.64013028 215.654048870024
47.66613028 243.318700169848
47.69213028 225.776322895335
47.71813028 205.063378783493
47.74413028 214.835795033524
47.77013028 221.185662343071
47.79613028 223.748726636862
47.82213028 218.697147549904
47.84813028 209.495485649672
47.87413028 210.425136009674
47.90013028 213.456780291372
47.92613028 207.133728423438
47.95213028 216.131128333538
47.97813028 219.757849044112
48.00413028 228.623568840543
48.03013028 228.230103154098
48.05613028 217.738975250209
48.08213028 220.314836073324
48.10813028 224.204510095448
48.13413028 233.730404623033
48.16013028 219.900080429706
48.18613028 206.43407449023
48.21213028 201.061869232919
48.23813028 195.485379430403
48.26413028 197.382769550058
48.29013028 194.605614680043
48.31613028 197.075704218576
48.34213028 218.854333063327
48.36813028 241.530723367617
48.39413028 224.551380858873
48.42013028 219.96412028189
48.44613028 234.6560390491
48.47213028 231.29971708733
48.49813028 230.219916248986
48.52413028 225.661016240033
48.55013028 229.867726482768
48.57613028 223.993361421092
48.60213028 240.332309605272
48.62813028 248.507343477011
48.65413028 220.912428419756
48.68013028 209.98220372472
48.70613028 207.816169950838
48.73213028 197.094071342455
48.75813028 215.194807305343
48.78413028 207.676202891098
48.81013028 222.506607770256
48.83613028 235.605501904974
48.86213028 212.352189766218
48.88813028 211.341238551562
48.91413028 204.406262215773
48.94013028 233.000551780066
48.96613028 199.909679978956
48.99213028 215.035602084763
49.01813028 234.834388723809
49.04413028 222.80083494887
49.07013028 198.708063188775
49.09613028 222.524497752133
49.12213028 208.844926975034
49.14813028 231.133899329423
49.17413028 232.429726278701
49.20013028 221.304217136264
49.22613028 187.632107378435
49.25213028 205.063159281018
49.27813028 242.462515744087
49.30413028 212.022247727666
49.33013028 214.992480849921
49.35613028 225.863284564647
49.38213028 237.731788377664
49.40813028 223.48409891657
49.43413028 213.421955536861
49.46013028 226.270350152251
49.48613028 233.565719028055
49.51213028 225.647661882876
49.53813028 209.39204030821
49.56413028 223.439280717905
49.59013028 227.694812072473
49.61613028 240.436877575402
49.64213028 235.851017260371
49.66813028 228.920473308441
49.69413028 219.414184795018
49.72013028 251.946369116669
49.74613028 224.45052258654
49.77213028 228.774590355793
49.79813028 226.08664589897
49.82413028 222.57308982723
49.85013028 229.990477650085
49.87613028 230.421749055146
49.90213028 233.896015899227
49.92813028 241.154247098111
49.95413028 229.331545295716
49.98013028 225.749436302101
50.00613028 237.832224152308
50.03213028 249.295917169376
50.05813028 212.418181660413
50.08413028 214.033931162526
50.11013028 239.19544581901
50.13613028 235.271656707613
50.16213028 214.36045415732
50.18813028 193.598840771043
50.21413028 208.124341403725
50.24013028 209.24679935573
50.26613028 191.834469409638
50.29213028 185
50.31813028 209.817859941604
50.34413028 218.284233734458
50.37013028 196.582544512068
50.39613028 197.994951657495
50.42213028 221.518933205345
50.44813028 205.170753325229
50.47413028 191.170040173554
50.50013028 200.95891405422
50.52613028 202.835727368451
50.55213028 196.219687212248
50.57813028 195.127341436344
50.60413028 202.090410241141
50.63013028 220.539990639267
50.65613028 234.508543305021
50.68213028 220.99857113526
50.70813028 204.170327341102
50.73413028 212.542245430866
50.76013028 213.802276834364
50.78613028 216.673809282859
50.81213028 226.906157694222
50.83813028 205.513991590195
50.86413028 206.653645440859
50.89013028 209.750410579861
50.91613028 201.099038999125
50.94213028 204.029950804434
50.96813028 224.673967168025
50.99413028 254.151721646218
51.02013028 218.53218780814
51.04613028 216.39835614379
51.07213028 212.349799644475
51.09813028 199.841665816389
51.12413028 210
51.15013028 205.758936096935
51.17613028 205.962368673813
51.20213028 228.018380144638
51.22813028 220.541503676341
51.25413028 216.895683621631
51.28013028 222.213461596767
51.30613028 224.222773978468
51.33213028 244.559622694958
51.35813028 208.788438362212
51.38413028 218.204487540427
51.41013028 231.018551050567
51.43613028 228.411210803913
51.46213028 207.067565623359
51.48813028 228.259870031829
51.51413028 198.375663363356
51.54013028 188.69836993293
51.56613028 204.963059270537
51.59213028 186.101658157605
51.61813028 218.751336261079
51.64413028 216.084723384967
51.67013028 209.41794913719
51.69613028 213
51.72213028 214.438925885282
51.74813028 226.488140892018
51.77413028 184.101567937508
51.80013028 199.94512417861
51.82613028 199.404581759274
51.85213028 208.350312362265
51.87813028 218.376634154613
51.90413028 232.924066744685
51.93013028 227.899977188849
51.95613028 209.088500747901
51.98213028 209.985419773318
52.00813028 171.955598251266
52.03413028 193.208229327573
52.06013028 217.891322389341
52.08613028 215.217077588031
52.11213028 203.770300275074
52.13813028 205.777658053487
52.16413028 211.495782351484
52.19013028 236.463118681979
52.21613028 241.688357420253
52.24213028 263.268724339994
52.26813028 266.876274554921
52.29413028 261.801886425964
52.32013028 312.385798185473
52.34613028 289.679215944482
52.37213028 284
52.39813028 263.333422699675
52.42413028 227.147108822168
52.45013028 254.693195794544
52.47613028 219.967604429505
52.50213028 226.313426277108
52.52813028 244.986929323895
52.55413028 214.479179856439
52.58013028 198.699550692405
52.60613028 223.902251048912
52.63213028 232.262637541221
52.65813028 223.270718005636
52.68413028 222.152553620847
52.71013028 218.046830932763
52.73613028 227.162772615239
52.76213028 224.434739045419
52.78813028 199.987310198033
52.81413028 215.380443606897
52.84013028 206.286524101838
52.86613028 221.570534847331
52.89213028 231.533023269259
52.91813028 220.83317587504
52.94413028 219.709769686739
52.97013028 232.950707793926
52.99613028 220.849588395636
53.02213028 209.765584210165
53.04813028 212.157211554946
53.07413028 202.195013787056
53.10013028 218.026731269334
53.12613028 229.316255403799
53.15213028 231.622665714351
53.17813028 240.057988629131
53.20413028 242.038144043968
53.23013028 228.743807576734
53.25613028 216.497682310463
53.28213028 215.553474278804
53.30813028 201.015428708505
53.33413028 211.942488512865
53.36013028 224.754313738676
53.38613028 200.806144417398
53.41213028 204.751116758604
53.43813028 225.297713887495
53.46413028 224.282414461311
53.49013028 213.360292785655
53.51613028 211.80000902201
53.54213028 220.801644368464
53.56813028 227.297601112374
53.59413028 225.404752665201
53.62013028 248.088829539
53.64613028 253.385850268512
53.67213028 225.573880178241
53.69813028 216.338903074133
53.72413028 217.244383192464
53.75013028 223.864223266623
53.77613028 227.097655244433
53.80213028 230.235467266934
53.82813028 231.762519998971
53.85413028 196.224632313893
53.88013028 195.754284210655
53.90613028 240.474257309815
53.93213028 222.311265192104
53.95813028 215.612046777292
53.98413028 222.734371960422
54.01013028 258.290014297156
54.03613028 234.379737428153
54.06213028 230.515636470908
54.08813028 256.001145183693
54.11413028 238.238619136959
54.14013028 200.532345693303
54.16613028 226.431155143442
54.19213028 242.556448269906
54.21813028 256.150563441773
54.24413028 243.633459043838
54.27013028 242.010322235249
54.29613028 247.646278128181
54.32213028 229.12550914244
54.34813028 247.690247844962
54.37413028 224.249634530119
54.40013028 253.689112195539
54.42613028 262.418271880527
54.45213028 235.369663298165
54.47813028 264.816331322506
54.50413028 230.849423537466
54.53013028 267.039105300968
54.55613028 269.928405421949
54.58213028 247.156618151328
54.60813028 257.81595044836
54.63413028 247.293194770036
54.66013028 292.280910958507
54.68613028 283.51148520683
54.71213028 299.040843888282
54.73813028 324.275075751432
54.76413028 327.847468934089
54.79013028 298.758010415775
54.81613028 306.846678583104
54.84213028 342.864735984412
54.86813028 321.362686393897
54.89413028 324.992984033446
54.92013028 348.469218501575
54.94613028 387.025415179721
54.97213028 379.490301977026
54.99813028 398.695279680215
55.02413028 406.298046165091
55.05013028 396.410339767013
55.07613028 411.702673034411
55.10213028 430.305403943389
55.12813028 458.329493499339
55.15413028 484.372501959118
55.18013028 491.529955571567
55.20613028 482.18427858838
55.23213028 493.902664012403
55.25813028 520.321116333114
55.28413028 573.69318277379
55.31013028 598.869029551628
55.33613028 624.574208969402
55.36213028 705.638738984348
55.38813028 793.904753945846
55.41413028 863.243337763134
55.44013028 897.31509719935
55.46613028 963.024931064455
55.49213028 1149.01846595299
55.51813028 1418.43651484449
55.54413028 1798.21677206274
55.57013028 2543.63936682418
55.59613028 3745.61622970176
55.62213028 4968.99174912617
55.64813028 5140.0891290165
55.67413028 4212.39703699635
55.70013028 3078.3430859311
55.72613028 2505.00824276128
55.75213028 2621.6478179176
55.77813028 2830.57355394848
55.80413028 2657.00447934434
55.83013028 2063.63282771697
55.85613028 1324.05928586478
55.88213028 809.479578163084
55.90813028 568.901268162202
55.93413028 465.79781584772
55.96013028 416.840330658245
55.98613028 384.937492253411
56.01213028 351.521707687728
56.03813028 324.562457869409
56.06413028 317.585702429858
56.09013028 298.557561364306
56.11613028 286.446651517078
56.14213028 289.204294079471
56.16813028 265.112090606632
56.19413028 236.182159126922
56.22013028 249.104258247559
56.24613028 259.954094748451
56.27213028 284.009554439202
56.29813028 292.571935109277
56.32413028 270.47648954639
56.35013028 242.719659890095
56.37613028 228.085523270303
56.40213028 239.778080551177
56.42813028 244.648429678923
56.45413028 234.296923536423
56.48013028 246.65568421648
56.50613028 246.625172097716
56.53213028 243.054959993659
56.55813028 217.258546969221
56.58413028 268.312478040868
56.61013028 265.342244918612
56.63613028 253.370847544144
56.66213028 223.779841693516
56.68813028 248.157727759233
56.71413028 236.718250093879
56.74013028 241.526762077992
56.76613028 250.916615259678
56.79213028 258.902860959853
56.81813028 247.699366765717
56.84413028 251.350244697192
56.87013028 248.560373983743
56.89613028 260.220212950726
56.92213028 264.304236204786
56.94813028 282.382405183182
56.97413028 258.329848331956
57.00013028 282.253725102184
57.02613028 247.935840399696
57.05213028 276.331100243001
57.07813028 243.861788034834
57.10413028 218.782231815263
57.13013028 274.729524051865
57.15613028 261.869397405007
57.18213028 249.980774859979
57.20813028 230.179220711608
57.23413028 251.584566780434
57.26013028 269.481498826543
57.28613028 256.542190786557
57.31213028 239.827053500418
57.33813028 255.945695027204
57.36413028 242.095916657122
57.39013028 269.569070406794
57.41613028 263.795054386099
57.44213028 258.491308344073
57.46813028 291.889009466937
57.49413028 275.71644384149
57.52013028 279.975771627524
57.54613028 287.896393286872
57.57213028 269.401082029622
57.59813028 273.579841181263
57.62413028 287.484234246634
57.65013028 267.796280255624
57.67613028 269.499501583606
57.70213028 254.949691892614
57.72813028 259.718524240663
57.75413028 264.348012460618
57.78013028 248.772280919887
57.80613028 256.205219760688
57.83213028 273.552270964303
57.85813028 270.570183501202
57.88413028 282.661187145963
57.91013028 270.6447104468
57.93613028 265.42642954427
57.96213028 275.846094713749
57.98813028 277.919889439009
58.01413028 292.719301570973
58.04013028 306.061730416278
58.06613028 318.954049638404
58.09213028 345.571473549302
58.11813028 361.506311068447
58.14413028 365.901509294447
58.17013028 409.426161445245
58.19613028 469.997535240196
58.22213028 572.34125064709
58.24813028 729.569917963469
58.27413028 1000.22071428386
58.30013028 1511.85092333944
58.32613028 2238.63306749509
58.35213028 2415.56353375202
58.37813028 2063.54196708676
58.40413028 1653.51235204647
58.43013028 1327.64818249888
58.45613028 1245.37136630969
58.48213028 1372.44509244474
58.50813028 1420.99233947201
58.53413028 1214.37433610345
58.56013028 913.027510450113
58.58613028 650.10610797392
58.61213028 467.468896683473
58.63813028 365.140589991362
58.66413028 302.550626083585
58.69013028 277.937824530931
58.71613028 248.040344191261
58.74213028 232.67873182948
58.76813028 234.273076038091
58.79413028 235.187594391335
58.82013028 249.617288580752
58.84613028 240.706589213985
58.87213028 239.984171348772
58.89813028 241.386021174442
58.92413028 229.353173578244
58.95013028 228.453828855297
58.97613028 218.89793841323
59.00213028 219.32319068452
59.02813028 204.77395184212
59.05413028 201.462247645012
59.08013028 230.55326779709
59.10613028 224.265363427061
59.13213028 207.108629014112
59.15813028 212.334590438393
59.18413028 196.265005107939
59.21013028 210.681067306911
59.23613028 211.046098712499
59.26213028 208.557912710427
59.28813028 227.972555578925
59.31413028 229.443335714112
59.34013028 204.370808481858
59.36613028 216.147760356597
59.39213028 198.733230263172
59.41813028 208.442932284954
59.44413028 212.790383431237
59.47013028 217.48222499911
59.49613028 175.829053213752
59.52213028 198.079549246582
59.54813028 207.882293688689
59.57413028 213.268579475653
59.60013028 189.925846955542
59.62613028 244.518446529072
59.65213028 200.442264243263
59.67813028 254.983155447456
59.70413028 235
59.73013028 234.399891735882
59.75613028 214.09327145706
59.78213028 218.982536002316
59.80813028 217.002380587478
59.83413028 205.133351035851
59.86013028 202.063104636707
59.88613028 170.021586658975
59.91213028 207.364821437379
59.93813028 196.660422836414
59.96413028 192.242896196915
59.99013028 209.657719505602
60.01613028 199.047392247094
60.04213028 187.085891123683
60.06813028 190.497933902225
60.09413028 213.241612196583
60.12013028 246.790976834865
60.14613028 200.550445643339
60.17213028 215.35733786308
60.19813028 227.499753175367
60.22413028 218.919363700536
60.25013028 234.432745379851
60.27613028 199.450203329769
60.30213028 207.205722944214
60.32813028 188.589812070388
60.35413028 203.551480613236
60.38013028 199.63376876641
60.40613028 205.476566745728
60.43213028 210.282024052908
60.45813028 225.264295442704
60.48413028 194.440155241253
60.51013028 202.465418583619
60.53613028 217.930840653737
60.56213028 191.135344701423
60.58813028 228.079865016908
60.61413028 224.116129095665
60.64013028 229.351112247596
60.66613028 228.272137336111
60.69213028 218.708385932107
60.71813028 202.969410681895
60.74413028 208.832143466476
60.77013028 206.524726788869
60.79613028 199.756474823679
60.82213028 197.776319408842
60.84813028 215.659458092861
60.87413028 215.568090081274
60.90013028 207.582073417834
60.92613028 192.551919618186
60.95213028 193.36903431876
60.97813028 205.209226160357
61.00413028 197.779467792368
61.03013028 210.23355428719
61.05613028 210.233651480283
61.08213028 212.966842681228
61.10813028 218.432623070463
61.13413028 210.434955061398
61.16013028 216.931401968073
61.18613028 218.054143601126
61.21213028 205.887858235424
61.23813028 214.294929870853
61.26413028 224.93251506248
61.29013028 196.901980388683
61.31613028 188.809850628757
61.34213028 196.066972219736
61.36813028 192.544445578153
61.39413028 195.987145339872
61.42013028 216
61.44613028 205.162547064995
61.47213028 195.003225582861
61.49813028 206.522975180796
61.52413028 212.31815187628
61.55013028 222.647549107697
61.57613028 205.620469053563
61.60213028 209.314171518131
61.62813028 209.391501548901
61.65413028 196.521249614248
61.68013028 178.10094849237
61.70613028 200.45103530439
61.73213028 204.026641049245
61.75813028 223.347393015476
61.78413028 231.413820428132
61.81013028 210.113138597307
61.83613028 216.100516460412
61.86213028 209.990719707585
61.88813028 200.845236697606
61.91413028 209.56083205716
61.94013028 215.444454856288
61.96613028 215.804150751821
61.99213028 229
62.01813028 228.067510979046
62.04413028 223.872955265465
62.07013028 227.508727231712
62.09613028 221.392494895189
62.12213028 246.620159330995
62.14813028 257.201342643395
62.17413028 243.054691894701
62.20013028 252.054453323697
62.22613028 240.099087595666
62.25213028 221.165194826197
62.27813028 278.482818402732
62.30413028 252.953730381572
62.33013028 252.617904539395
62.35613028 269.264250332651
62.38213028 278.950491777949
62.40813028 276.164511202548
62.43413028 300.916453888012
62.46013028 290.145905507674
62.48613028 290.976813570357
62.51213028 264.893935500058
62.53813028 289.838162600243
62.56413028 256.906319065951
62.59013028 263.434119600279
62.61613028 274.199223181945
62.64213028 269.49632111072
62.66813028 253.574922121135
62.69413028 229.564119257389
62.72013028 216.349844754524
62.74613028 235.18458482445
62.77213028 234.529326592161
62.79813028 208.267618218655
62.82413028 209.08694260078
62.85013028 193.2419705157
62.87613028 201.59170854287
62.90213028 236.722275562074
62.92813028 218.947827509417
62.95413028 209.008938480556
62.98013028 215.094610101765
63.00613028 203.767748781611
63.03213028 215.368908522877
63.05813028 186.624982123254
63.08413028 213.430042049035
63.11013028 196.45285806403
63.13613028 213.692737721067
63.16213028 198.1219773235
63.18813028 192.253470023926
63.21413028 207.979787561459
63.24013028 206.420262059596
63.26613028 207.754013550369
63.29213028 198.623217494422
63.31813028 215.416207063386
63.34413028 211.414930035986
63.37013028 204.278911245166
63.39613028 204.370466669998
63.42213028 210.196110374201
63.44813028 237.777861048697
63.47413028 240.404904502604
63.50013028 211.355454411358
63.52613028 220.196874683751
63.55213028 234.720001701951
63.57813028 233
63.60413028 243.452944797635
63.63013028 250.379301909698
63.65613028 242.105964745581
63.68213028 245.887374120482
63.70813028 245.301149438501
63.73413028 230.994564735591
63.76013028 217.16881779053
63.78613028 220.9788714145
63.81213028 243.003203027837
63.83813028 237.252660604332
63.86413028 235.331690160128
63.89013028 242.533745955262
63.91613028 220.24042538934
63.94213028 219.265634087343
63.96813028 211.849098232863
63.99413028 203.467350631834
64.02013028 234.782796616087
64.04613028 231.040811798994
64.07213028 216.312032988155
64.09813028 214.040785757465
64.12413028 227.889745173695
64.15013028 229.126802677036
64.17613028 241.654916420432
64.20213028 235.73202090097
64.22813028 219.800499184778
64.25413028 238.208390699238
64.28013028 239.246947706634
64.30613028 231.330709834602
64.33213028 224.178646376519
64.35813028 225.539055423787
64.38413028 215.524862119014
64.41013028 220.089232968164
64.43613028 213.791699520862
64.46213028 224.113596670784
64.48813028 221.828885794322
64.51413028 193.725256526158
64.54013028 181.489908082138
64.56613028 219.379392129797
64.59213028 228.268921287393
64.61813028 213.798948010651
64.64413028 189.509901018184
64.67013028 231.143340993504
64.69613028 234.401536616595
64.72213028 243.70168317462
64.74813028 201.157908199423
64.77413028 216.652526298694
64.80013028 206.874590611913
64.82613028 227.011373712348
64.85213028 247.67007098221
64.87813028 231.447738569957
64.90413028 235.568183787854
64.93013028 195.029431113657
64.95613028 239.136783100426
64.98213028 241.956240251435
65.00813028 200.703208307237
65.03413028 248.960139923743
65.06013028 240.049440556978
65.08613028 209.477886321847
65.11213028 216.797296156938
65.13813028 198.669945186324
65.16413028 193.225912827731
65.19013028 196.779580567489
65.21613028 208.219674191492
65.24213028 198.824443876198
65.26813028 190.678973886979
65.29413028 198.146853743913
65.32013028 212.429255184471
65.34613028 187.439158408411
65.37213028 205.885977345019
65.39813028 196.882764782926
65.42413028 200.989161560465
65.45013028 213.839411024786
65.47613028 212.657000306102
65.50213028 202.090068429281
65.52813028 190.209135940261
65.55413028 221.851287920654
65.58013028 226.019696234259
65.60613028 189.623769274486
65.63213028 193.195674855749
65.65813028 206.195526504843
65.68413028 211.269114748466
65.71013028 215.732246451203
65.73613028 222.892215981272
65.76213028 208.288091783223
65.78813028 187.666351750089
65.81413028 208.856884556746
65.84013028 207.456919108012
65.86613028 179.331787353219
65.89213028 187.278817538584
65.91813028 209.341418991761
65.94413028 191.028351033758
65.97013028 189.650074559644
65.99613028 199.823824431061
66.02213028 200.117854662215
66.04813028 189.12064821302
66.07413028 196.97335546425
66.10013028 187.473938052984
66.12613028 203.796937837812
66.15213028 204.355809243991
66.17813028 197.949872332801
66.20413028 188.37807952667
66.23013028 192.988106596868
66.25613028 195.162214787408
66.28213028 188.168953120671
66.30813028 201.364731217281
66.33413028 211
66.36013028 207.511256170096
66.38613028 200.092242535044
66.41213028 202.221116076991
66.43813028 213.217625881604
66.46413028 204.697618644145
66.49013028 211.887806152451
66.51613028 212.351932126679
66.54213028 183.862974842076
66.56813028 193
66.59413028 199.954552821936
66.62013028 213.592521448966
66.64613028 217.053766213483
66.67213028 206.792835170287
66.69813028 197.585815204984
66.72413028 208.470637832059
66.75013028 214.057521021279
66.77613028 196.886564700882
66.80213028 179.394878969167
66.82813028 168.959372127696
66.85413028 180.605920916159
66.88013028 198.100700387101
66.90613028 203.501191574371
66.93213028 230.036750755018
66.95813028 205.378924522056
66.98413028 201.520513907486
67.01013028 198.243641437939
67.03613028 186.404123685794
67.06213028 202.528132811915
67.08813028 226.368076548253
67.11413028 210
67.14013028 206.386982431444
67.16613028 193.3356063397
67.19213028 201.894057809444
67.21813028 216.025737923051
67.24413028 217.296217357684
67.27013028 198.302223470691
67.29613028 199.435242228944
67.32213028 197.18140435164
67.34813028 205
67.37413028 207.117028735367
67.40013028 221.563993461497
67.42613028 201.465247677695
67.45213028 215.020131752599
67.47813028 202.780532290228
67.50413028 186.629133387335
67.53013028 182.867997143047
67.55613028 216.286569211895
67.58213028 200.41657491676
67.60813028 213.044243863569
67.63413028 214.658410102322
67.66013028 187.011386733105
67.68613028 191.961775270199
67.71213028 218.525684559371
67.73813028 223.862552344382
67.76413028 224
67.79013028 229.715995302282
67.81613028 217.744333315286
67.84213028 202.074859223197
67.86813028 197.308403976124
67.89413028 216.172510981133
67.92013028 209.87251021275
67.94613028 236.68709597494
67.97213028 206.438026245577
67.99813028 207.239725258366
68.02413028 231.310861762941
68.05013028 237.560328873693
68.07613028 248.965768649113
68.10213028 235.995229290776
68.12813028 234.647352160306
68.15413028 252.088829538997
68.18013028 239.119538605208
68.20613028 252.466002452846
68.23213028 242.104248713303
68.25813028 262.770067751839
68.28413028 299.037408337204
68.31013028 289.144499197961
68.33613028 303.096038966496
68.36213028 297.515617402383
68.38813028 351.680705501294
68.41413028 397.579518437923
68.44013028 451.390339857933
68.46613028 606.853196488697
68.49213028 928.579841892072
68.51813028 1227.15820653724
68.54413028 1100.22579236888
68.57013028 782.090931782325
68.59613028 532.953989871547
68.62213028 451.283627310076
68.64813028 492.391346225025
68.67413028 587.914488825254
68.70013028 669.139295531558
68.72613028 705.909267015527
68.75213028 565.272571218424
68.77813028 392.652604423224
68.80413028 312.452390456285
68.83013028 272.882548766949
68.85613028 266.004370766558
68.88213028 269.928140809426
68.90813028 269.526007302559
68.93413028 249.872684605195
68.96013028 234.036976305252
68.98613028 237.992480849921
69.01213028 221.006229101991
69.03813028 202.476395839797
69.06413028 209.997103208236
69.09013028 225.304820074144
69.11613028 229.533710379477
69.14213028 222.689879991587
69.16813028 226.121412522673
69.19413028 225.079620398153
69.22013028 207.488963332384
69.24613028 196.014912504276
69.27213028 201.903189750952
69.29813028 217.508691655926
69.32413028 215.592992543203
69.35013028 206.928015013544
69.37613028 214.379962978395
69.40213028 225.925292614208
69.42813028 208.103893880678
69.45413028 196.317639158492
69.48013028 194.845981938626
69.50613028 180.470573653477
69.53213028 171.817869475862
69.55813028 207.945649917162
69.58413028 212.731972304416
69.61013028 204.514943312828
69.63613028 191.686408864729
69.66213028 209.660871375631
69.68813028 187.110093454633
69.71413028 200.126335069297
69.74013028 197.208493940095
69.76613028 200.382859770154
69.79213028 205.849714191516
69.81813028 190.680905935241
69.84413028 205.700876316292
69.87013028 216.298997887829
69.89613028 198.722875938694
69.92213028 185.561515680924
69.94813028 218.450612806697
69.97413028 207.642420079419
70.00013028 202.486766671595
70.02613028 183.390882103755
70.05213028 196.804837862041
70.07813028 205
70.10413028 206.530800566948
70.13013028 228.312510130163
70.15613028 247.408407718742
70.18213028 216.601850337924
70.20813028 207.986458229655
70.23413028 239.420858949703
70.26013028 211.030144265389
70.28613028 213.999874204119
70.31213028 213.0097964967
70.33813028 203.197187892816
70.36413028 201.059282163618
70.39013028 229.813098766634
70.41613028 212.940227673518
70.44213028 201.653487555693
70.46813028 226.128083190867
70.49413028 222.475515268631
70.52013028 202.872671584413
70.54613028 228.027086101959
70.57213028 206.05254383046
70.59813028 217.09693255843
70.62413028 209.417504084472
70.65013028 216.61213699739
70.67613028 211.189668742742
70.70213028 196.538094166791
70.72813028 206.471702329916
70.75413028 207.356950941175
70.78013028 205.376795526338
70.80613028 204.198320055751
70.83213028 179.455512798289
70.85813028 198.800566849851
70.88413028 200.596608534467
70.91013028 211.95384315669
70.93613028 193.437945559746
70.96213028 180.062830489919
70.98813028 186.786686754141
71.01413028 199.389920846764
71.04013028 192.314310334767
71.06613028 184.487714907732
71.09213028 197.543229242882
71.11813028 191.030363767863
71.14413028 197.108422532396
71.17013028 205.651071392428
71.19613028 202.430081111323
71.22213028 206.429232629441
71.24813028 210
71.27413028 213.115393388903
71.30013028 219.905251081592
71.32613028 212.745020425498
71.35213028 192.947140399207
71.37813028 181.666441970183
71.40413028 194.910147586689
71.43013028 203.745820310834
71.45613028 208.643471556517
71.48213028 209.650397302976
71.50813028 219.344451113672
71.53413028 228.904576992139
71.56013028 204.900861246511
71.58613028 198.616323837251
71.61213028 218.434977616426
71.63813028 219.158334183611
71.66413028 213.051511421886
71.69013028 209.678390017623
71.71613028 214.724794966203
71.74213028 219.555225886874
71.76813028 210.089003931311
71.79413028 196.507343477028
71.82013028 184.170578932865
71.84613028 195.143647229572
71.87213028 212.210268103192
71.89813028 205.99573247431
71.92413028 195.749871820553
71.95013028 192
71.97613028 195.551767780777
72.00213028 203.726272427483
72.02813028 203.311345877937
72.05413028 204.460657408661
72.08013028 216.636710668226
72.10613028 207.750087836532
72.13213028 212.521784887057
72.15813028 206.714234159945
72.18413028 206.791767185927
72.21013028 219.607114696404
72.23613028 213.767861556787
72.26213028 214.277779082236
72.28813028 212.541639006482
72.31413028 221.285756305788
72.34013028 207.025912315473
72.36613028 192.714163008376
72.39213028 206.803579903227
72.41813028 206.186497804191
72.44413028 209.118906139316
72.47013028 215.500282400414
72.49613028 194.865381470968
72.52213028 180.055320874103
72.54813028 194.46395414309
72.57413028 209.365179756495
72.60013028 209.447586732557
72.62613028 238.500982531395
72.65213028 202.166366051478
72.67813028 211.167227554129
72.70413028 192.309410343174
72.73013028 196
72.75613028 197.322684014495
72.78213028 219.333099956339
72.80813028 225.472712183458
72.83413028 212.221928983085
72.86013028 220.071275321216
72.88613028 223.73941425515
72.91213028 191.066849910346
72.93813028 231.510130054932
72.96413028 188.962294960986
72.99013028 202.523110510946
73.01613028 194.375434326668
73.04213028 183.568009395437
73.06813028 210.214774199888
73.09413028 199.929263438088
73.12013028 235.743836179537
73.14613028 214.465812478519
73.17213028 209.303746042025
73.19813028 201.000538759306
73.22413028 215.8203212148
73.25013028 213.655077792101
73.27613028 209.563751404007
73.30213028 207.301720287166
73.32813028 217.070610766023
73.35413028 204.072685117436
73.38013028 195.264389149293
73.40613028 207.760661663542
73.43213028 219.794812328599
73.45813028 203.049453577746
73.48413028 226.848300908806
73.51013028 213.446677558597
73.53613028 238.15340815049
73.56213028 212.753904261755
73.58813028 199.52001072396
73.61413028 180.748191364048
73.64013028 224.410503699946
73.66613028 206.357928705443
73.69213028 216.210996836966
73.71813028 229.071149525335
73.74413028 223.195391174699
73.77013028 204.577612431188
73.79613028 221.442803002586
73.82213028 225.540977937789
73.84813028 219.718456575592
73.87413028 222.785096517736
73.90013028 229.346489889286
73.92613028 222.834927482995
73.95213028 216.398917458123
73.97813028 221.911602492958
74.00413028 227.162475913428
74.03013028 228.571315664132
74.05613028 229
74.08213028 241.132363737328
74.10813028 247.750707281673
74.13413028 238.620482074327
74.16013028 241.347267219589
74.18613028 246.952872365427
74.21213028 257.044630785475
74.23813028 262.112877471284
74.26413028 252.107909814609
74.29013028 265.52324584109
74.31613028 258.118455038831
74.34213028 241.11519644145
74.36813028 261.865584466295
74.39413028 263.675964320094
74.42013028 260.957368927862
74.44613028 277.376769484814
74.47213028 289.363086336556
74.49813028 267.254996081751
74.52413028 246.382792105083
74.55013028 264.52488118754
74.57613028 268.956621125542
74.60213028 246.181513640278
74.62813028 279.5103530439
74.65413028 262.0032065142
74.68013028 256.727975439007
74.70613028 272.493311543911
74.73213028 268.820482586576
74.75813028 271.532542640759
74.78413028 269.134276717066
74.81013028 272.820940660054
74.83613028 269.725508117938
74.86213028 249.416349366517
74.88813028 238.609240205625
74.91413028 254.128338269132
74.94013028 254.048956441974
74.96613028 274.785886868804
74.99213028 273.591618322772
75.01813028 272.971342730161
75.04413028 274.972191212044
75.07013028 267.220967726085
75.09613028 273.658006673151
75.12213028 278.545793757059
75.14813028 293.364911657465
75.17413028 323.320116939046
75.20013028 277.869187436801
75.22613028 309.480718009805
75.25213028 344.104967912798
75.27813028 345.475228101084
75.30413028 352.809069811956
75.33013028 387.28645899804
75.35613028 440.261114969648
75.38213028 445.494624147027
75.40813028 471.181736629233
75.43413028 475.852284753436
75.46013028 501.251882348788
75.48613028 587.266343752581
75.51213028 604.608968620081
75.53813028 709.55720560642
75.56413028 869.715865094681
75.59013028 1189.19288550212
75.61613028 1600.81133136204
75.64213028 2153.3031740536
75.66813028 2858.32587544326
75.69413028 3152.6068803227
75.72013028 2634.56007842167
75.74613028 1824.01963155907
75.77213028 1300.73896941679
75.79813028 1113.2338363322
75.82413028 1148.42729360817
75.85013028 1206.72855582189
75.87613028 1398.63540574894
75.90213028 1639.51382836808
75.92813028 1508.14330378169
75.95413028 1255.34044051659
75.98013028 904.30253596886
76.00613028 641.415193012498
76.03213028 467.024839208586
76.05813028 406.497056817539
76.08413028 377.738727144736
76.11013028 333.123387119737
76.13613028 322
76.16213028 293.207868447189
76.18813028 271.287988542369
76.21413028 251.505295167142
76.24013028 248.911683178791
76.26613028 237.794025464027
76.29213028 249.285752819291
76.31813028 250.414768664379
76.34413028 243.870610253771
76.37013028 237.251834677471
76.39613028 243.020644470497
76.42213028 247.658464746626
76.44813028 246.70291509191
76.47413028 248.554480645854
76.50013028 240.569531966773
76.52613028 246.137960373401
76.55213028 239.605227758184
76.57813028 244.176481805018
76.60413028 248.876939110112
76.63013028 234.997358286488
76.65613028 230.984148793748
76.68213028 227.84833997108
76.70813028 227.943875754063
76.73413028 228.763616586112
76.76013028 228.117899772265
76.78613028 229.480447349391
76.81213028 227.980739284195
76.83813028 230.497956457248
76.86413028 250.652716273141
76.89013028 259.842320837318
76.91613028 256.639294250912
76.94213028 248.739414255159
76.96813028 242.352221855503
76.99413028 247.957211042697
77.02013028 248.465544379494
77.04613028 256.376373028646
77.07213028 251.231222296261
77.09813028 256.203881116041
77.12413028 262.171688540772
77.15013028 257.909751130524
77.17613028 254.302210449929
77.20213028 253.815324955456
77.22813028 246.631452357516
77.25413028 266.249534775824
77.28013028 259.662058182869
77.30613028 257.788932011475
77.33213028 250.688815493729
77.35813028 250.903786641069
77.38413028 259.409478264375
77.41013028 277.532758656736
77.43613028 282.642523320275
77.46213028 274.553258262823
77.48813028 266.52971351407
77.51413028 276.857530043249
77.54013028 269.318061656182
77.56613028 279.218838730365
77.59213028 286.152153678181
77.61813028 280.171449969769
77.64413028 277.453147792845
77.67013028 310.084884756636
77.69613028 296.310910359486
77.72213028 294.623501175473
77.74813028 307.115551274072
77.77413028 329.002461273313
77.80013028 322.734833520396
77.82613028 322.594592313874
77.85213028 340.087887350524
77.87813028 397.767554395474
77.90413028 486.251292431657
77.93013028 532.85194806416
77.95613028 706.423383476382
77.98213028 844.054376835159
78.00813028 1120.99162795638
78.03413028 1275.15684811326
78.06013028 1137.72664213129
78.08613028 892.937387376515
78.11213028 679.986156405246
78.13813028 532.920944402673
78.16413028 511.13923483947
78.19013028 570.024931064724
78.21613028 612.874542015395
78.24213028 708.462618059368
78.26813028 795.950413653356
78.29413028 721.643046497594
78.32013028 520.83114848415
78.34613028 437.683867830825
78.37213028 355.199404547387
78.39813028 339.86066540617
78.42413028 284.438658711491
78.45013028 275.346422224212
78.47613028 236.517440162036
78.50213028 256.075758862895
78.52813028 267.692831427663
78.55413028 252.948101656208
78.58013028 254.174572311773
78.60613028 250.875039151132
78.63213028 244.294510859657
78.65813028 224.481605553968
78.68413028 231.133154088398
78.71013028 215.938031012714
78.73613028 209.449238586269
78.76213028 216.654584142838
78.78813028 227.310897338723
78.81413028 223.289475537912
78.84013028 212.171701561529
78.86613028 220.61230790332
78.89213028 206.387979264229
78.91813028 205.353321929152
78.94413028 195.471957408065
78.97013028 224.990083755164
78.99613028 226.800686597961
79.02213028 198.680464369031
79.04813028 213.596214639557
79.07413028 234.110299936348
79.10013028 225.270627785536
79.12613028 212.361083136727
79.15213028 204.683631821082
79.17813028 194.112877471285
79.20413028 214.06473649667
79.23013028 202.830856904871
79.25613028 196.26950167037
79.28213028 207.701037687955
79.30813028 195.629833518306
79.33413028 199.226367414711
79.36013028 213.148982739629
79.38613028 210.254089469066
79.41213028 212.208813196932
79.43813028 204.29807220661
79.46413028 212.394930126978
79.49013028 227.173120892004
79.51613028 209.012625623386
79.54213028 202.613475642035
79.56813028 197.553316393636
79.59413028 190.719175775101
79.62013028 192.867681372716
79.64613028 194.41821026322
79.67213028 206.163643652033
79.69813028 206.22476764404
79.72413028 208.79666717753
79.75013028 204.562241853436
79.77613028 195.243021992797
79.80213028 202.477034353466
79.82813028 203.730156517774
79.85413028 183.487221258568
79.88013028 198.808795665168
79.90613028 218.631020325552
79.93213028 217.301939789643
79.95813028 206.090329555305
79.98413028 221.375098562582
80.01013028 226.251393111249
80.03613028 189.441467844428
80.06213028 191.501469207655
80.08813028 206.447851345085
80.11413028 223.247496000207
80.14013028 216.937769886695
80.16613028 189.822746912437
80.19213028 202.923747487845
80.21813028 197.664870802307
80.24413028 215.4020207316
80.27013028 198.530449220829
80.29613028 189.620388367734
80.32213028 199.72193375022
80.34813028 208.67463869621
80.37413028 186.450828822575
80.40013028 186.333274348771
80.42613028 171.173885201557
80.45213028 181.169169136644
80.47813028 197.995283935091
80.50413028 206.503324056587
80.53013028 209.094407106552
80.55613028 191.373943844617
80.58213028 205.794735129263
80.60813028 189.39024359009
80.63413028 179.387359819088
80.66013028 170.344470182174
80.68613028 224.1261546291
80.71213028 197.80888588526
80.73813028 234.443155273932
80.76413028 186
80.79013028 186
80.81613028 197.779167604061
80.84213028 207.716750077567
80.86813028 176.262160399207
80.89413028 173.096339154812
80.92013028 223.863039020655
80.94613028 174.808793103896
80.97213028 194.051588621231
80.99813028 173.196468693311
81.02413028 195.359911911518
81.05013028 184.615549993438
81.07613028 196.235615617844
81.10213028 197.127547917952
81.12813028 200.450119157436
81.15413028 214.641719948437
81.18013028 211.101203570627
81.20613028 187.515401386411
81.23213028 194.519768666458
81.25813028 202.690428285161
81.28413028 216.044940508047
81.31013028 211.069262587119
81.33613028 224.663028974128
81.36213028 201.163750379492
81.38813028 198.343148044805
81.41413028 213.560922277312
81.44013028 209.078452659439
81.46613028 227.272659588169
81.49213028 219.804028442439
81.51813028 210.431522996822
81.54413028 218.852823512753
81.57013028 225.081552446418
81.59613028 210.9535724964
81.62213028 230.960249212368
81.64813028 216.108474615445
81.67413028 219.662364418951
81.70013028 241.884787051292
81.72613028 229.970488200513
81.75213028 208.385288954171
81.77813028 223.506536618701
81.80413028 207.981591252561
81.83013028 208.622720358548
81.85613028 220.83058880585
81.88213028 211.953033737095
81.90813028 208.824305059557
81.93413028 201.566041771394
81.96013028 214.165607789698
81.98613028 216.552458377494
82.01213028 203.474828158415
82.03813028 211.243992784055
82.06413028 221.526636282111
82.09013028 208.147041157101
82.11613028 203.651584110213
82.14213028 208.391033941165
82.16813028 208.381485549728
82.19413028 203.872810401057
82.22013028 187
82.24613028 203.998977125705
82.27213028 215.777226021527
82.29813028 199.91986688406
82.32413028 209.183129918188
82.35013028 211.548900517021
82.37613028 190.31755847266
82.40213028 190.612962924245
82.42813028 194.526794167279
82.45413028 210.643507132301
82.48013028 206.534294248829
82.50613028 203.029834542818
82.53213028 202.465480200824
82.55813028 201.038540500135
82.58413028 219.021083475453
82.61013028 196.248654204663
82.63613028 189.879625933656
82.66213028 204.494030743411
82.68813028 207.793693186433
82.71413028 197.713650290589
82.74013028 191.279175857688
82.76613028 188.460783204545
82.79213028 205.544993871725
82.81813028 200.736288426661
82.84413028 197.098680680016
82.87013028 225.627165763283
82.89613028 212.807163805207
82.92213028 197.221083987704
82.94813028 191.687508938376
82.97413028 205.790235080334
83.00013028 206.593131359844
83.02613028 192.942704528844
83.05213028 224.868794467113
83.07813028 191.065220611664
83.10413028 194.987884533126
83.13013028 167.31971607119
83.15613028 213.873816768099
83.18213028 193.809379534526
83.20813028 212.043905538205
83.23413028 173.05883362442
83.26013028 190.342312583683
83.28613028 196.805102474563
83.31213028 192.203400487539
83.33813028 199.038269839849
83.36413028 201.036850509371
83.39013028 204.997161339044
83.41613028 194.116951536028
83.44213028 182.246651004822
83.46813028 194.603804941214
83.49413028 187.323190684522
83.52013028 228.785870361533
83.54613028 196.229006566942
83.57213028 187.491159993169
83.59813028 194.359295952867
83.62413028 210.469824925963
83.65013028 188.598247367416
83.67613028 177.988693952725
83.70213028 191.083565180514
83.72813028 198.221803187206
83.75413028 207.603782386192
83.78013028 216.654103514338
83.80613028 223.883735574191
83.83213028 219.185720473877
83.85813028 232.772403229273
83.88413028 193.029360887305
83.91013028 193.410978280684
83.93613028 218.145821335354
83.96213028 210.723001734567
83.98813028 212.397543237579
84.01413028 196.493427805538
84.04013028 174.472873555127
84.06613028 180.860971642237
84.09213028 182.805834694826
84.11813028 195.707856707062
84.14413028 205.980806949266
84.17013028 210.806486229254
84.19613028 194.015819116973
84.22213028 194.863100637958
84.24813028 203.031128077413
84.27413028 221.54830967468
84.30013028 206.527636601402
84.32613028 212.620546252905
84.35213028 217.310510416816
84.37813028 199.688406016799
84.40413028 192.836962772238
84.43013028 199.421587683482
84.45613028 208.332287050247
84.48213028 198.601256934304
84.50813028 193.581054030023
84.53413028 183.494972931879
84.56013028 177.42229734872
84.58613028 184.25718925605
84.61213028 189.664712917136
84.63813028 190.430939127464
84.66413028 196.696469973956
84.69013028 206.012702822615
84.71613028 209.479760239301
84.74213028 217.76663568726
84.76813028 203.223193914904
84.79413028 193.831569131365
84.82013028 215.989206670514
84.84613028 223.774567800769
84.87213028 203.880297461861
84.89813028 190.256705141039
84.92413028 212.241625217343
84.95013028 207.132802742278
84.97613028 204.880609745685
85.00213028 213.158918052969
85.02813028 214.109532140306
85.05413028 221.628836685524
85.08013028 205.495808393009
85.10613028 204.810018048202
85.13213028 221.961607850762
85.15813028 205.193191027414
85.18413028 215.370695706737
85.21013028 214
85.23613028 211.051924385312
85.26213028 207.133737957758
85.28813028 208.400888568671
85.31413028 195.240650939587
85.34013028 210.316539084852
85.36613028 218.774019507196
85.39213028 215.470547611841
85.41813028 212.943672758847
85.44413028 198.138283116737
85.47013028 198.699124708211
85.49613028 212.413246093042
85.52213028 215.755532635203
85.54813028 234.146138030915
85.57413028 205.316355158153
85.60013028 219.34977708945
85.62613028 209.087248836853
85.65213028 231.23133855788
85.67813028 223.405471864696
85.70413028 246.418968524999
85.73013028 238.917763929865
85.75613028 215.794489585266
85.78213028 242
85.80813028 239.934037633805
85.83413028 216.664870802304
85.86013028 239.263256986364
85.88613028 227.280501481572
85.91213028 232.484408639134
85.93813028 219.45739625002
85.96413028 236.033966738368
85.99013028 237.901144927558
86.01613028 224.040057023702
86.04213028 224.98721649144
86.06813028 244.545883977157
86.09413028 227.58730568702
86.12013028 218.382953476627
86.14613028 239.793128385593
86.17213028 272.878570970054
86.19813028 250.880248865304
86.22413028 248.082239556632
86.25013028 256.170543357078
86.27613028 228.266692537449
86.30213028 280.05560106866
86.32813028 288.756142546084
86.35413028 280.318510195399
86.38013028 259.260786178797
86.40613028 251.758478023514
86.43213028 276.151463081466
86.45813028 297.569196202676
86.48413028 274.806799438315
86.51013028 277.89476747468
86.53613028 296.772551580174
86.56213028 304.943853199038
86.58813028 308.336545041679
86.61413028 355.904489333323
86.64013028 364.686973665559
86.66613028 366.745407347406
86.69213028 358.390930700299
86.71813028 370.313974570685
86.74413028 392.544235609943
86.77013028 400.41878459831
86.79613028 403.797880026295
86.82213028 421.549145135809
86.84813028 401.814983143376
86.87413028 439.897437790975
86.90013028 490.071671777383
86.92613028 551.73939077489
86.95213028 625.355282580178
86.97813028 720.041507518251
87.00413028 828.830174917188
87.03013028 987.54235030773
87.05613028 1255.87980708457
87.08213028 1656.54940256097
87.10813028 2320.93004638733
87.13413028 3384.37553599889
87.16013028 4584.6555447563
87.18613028 5263.43750726567
87.21213028 4762.82469611116
87.23813028 3565.75753740362
87.26413028 2473.06950343761
87.29013028 1755.16908005609
87.31613028 1389.73986464481
87.34213028 1273.31313910956
87.36813028 1401.40781502603
87.39413028 1737.23823107552
87.42013028 2237.72895113848
87.44613028 2682.52098222604
87.47213028 2695.89326418614
87.49813028 2231.52268403016
87.52413028 1582.43755465483
87.55013028 1049.24917318415
87.57613028 758.585717301091
87.60213028 579.068953789794
87.62813028 484.971295058867
87.65413028 426.838969458583
87.68013028 380.117371472447
87.70613028 328.182481870259
87.73213028 317.86598789546
87.75813028 302.682477103132
87.78413028 281.037621791915
87.81013028 247.687480335584
87.83613028 241.036650075412
87.86213028 258.977359302647
87.88813028 208.758994227798
87.91413028 204.274662787997
87.94013028 223.628891329834
87.96613028 235.55340312724
87.99213028 245.354331782693
88.01813028 230.969410681896
88.04413028 221.892799850628
88.07013028 227.772609710987
88.09613028 242.473818304872
88.12213028 256.9050706414
88.14813028 237.210100683762
88.17413028 206.652823000501
88.20013028 209.091655179197
88.22613028 229.846256085414
88.25213028 226.698854047813
88.27813028 208.447422799626
88.30413028 188.546231836761
88.33013028 251.323755485367
88.35613028 214.375205289931
88.38213028 213.051036841148
88.40813028 249.808515470616
88.43413028 224.735785243138
88.46013028 208.871113437296
88.48613028 206.94547901123
88.51213028 207.73934915135
88.53813028 244.722588771146
88.56413028 237.396065776409
88.59013028 252.258409077807
88.61613028 203.162014353451
88.64213028 235.834578698254
88.66813028 217.283766126714
88.69413028 251.129992684115
88.72013028 196.017219378921
88.74613028 201.642384503637
88.77213028 221.852891177832
88.79813028 202.420023488592
88.82413028 202.851062370419
88.85013028 206.662435570514
88.87613028 231.45353820126
88.90213028 226.83388554028
88.92813028 221.570789925584
88.95413028 220.124080277698
88.98013028 210.474028273076
89.00613028 213.280375685577
89.03213028 245.307655248587
89.05813028 248.491308344074
89.08413028 210.816128327291
89.11013028 230.757122871602
89.13613028 219.257799166938
89.16213028 211.813834473404
89.18813028 215.719714534403
89.21413028 203.796154459746
89.24013028 193.099029464861
89.26613028 211.435009705711
89.29213028 228.457018862373
89.31813028 208.415755962905
89.34413028 215.995877338717
89.37013028 227.020141286974
89.39613028 211.318981289634
89.42213028 220.038324484157
89.44813028 220.813434530734
89.47413028 249.841271921492
89.50013028 242.970797923085
89.52613028 200.433794295682
89.55213028 208.612865731167
89.57813028 239.857971609625
89.60413028 229.280540543853
89.63013028 224.415281382164
89.65613028 208.935411854228
89.68213028 210.354292720419
89.70813028 202.354802876825
89.73413028 194.626007558832
89.76013028 207.093258436357
89.78613028 213.441593640309
89.81213028 194.351541718298
89.83813028 203.773841628275
89.86413028 208.612176059674
89.89013028 184.144373402078
89.91613028 173.982410206435
89.94213028 173
89.96813028 180.334254674296
89.99413028 190.874168114228
90.02013028 202.913008802669
90.04613028 204.734698190248
90.07213028 200.391133695521
90.09813028 192.941156841226
90.12413028 187.882496683916
90.15013028 226.813701704539
90.17613028 233.244825683908
90.20213028 211.389140029947
90.22813028 228.441090456783
90.25413028 218.783703228772
90.28013028 205.520468797437
90.30613028 208.399407620886
90.33213028 204.348509596361
90.35813028 188.86336176399
90.38413028 207.009419109056
90.41013028 196.993216556583
90.43613028 190.551867535137
90.46213028 208.291891701182
90.48813028 196.743026759926
90.51413028 201
90.54013028 201.54131974965
90.56613028 195.960085279437
90.59213028 182.521197531196
90.61813028 204.408929970802
90.64413028 206.456703092036
90.67013028 189.768387295334
90.69613028 199.589144028696
90.72213028 209.177127291676
90.74813028 193.426155397483
90.77413028 188.279611376143
90.80013028 182.514604062333
90.82613028 210.123648245738
90.85213028 192.880254913072
90.87813028 206.024928503452
90.90413028 188.922234450777
90.93013028 194.512698055595
90.95613028 190.776193612961
90.98213028 188.184152792497
91.00813028 183.025289383836
91.03413028 201.275137368725
91.06013028 183.877564603026
91.08613028 205.695205967372
91.11213028 172.361605388791
91.13813028 197.679154327064
91.16413028 212.902425441401
91.19013028 210
91.21613028 210.114122409332
91.24213028 218.895196945369
91.26813028 181.272244063474
91.29413028 194.760787459418
91.32013028 194.027008902623
91.34613028 241.190371434982
91.37213028 190.576941828238
91.39813028 190.829672658896
91.42413028 179.800376875388
91.45013028 184.540277806816
91.47613028 194.134573418875
91.50213028 188.675254654859
91.52813028 196.042514810522
91.55413028 205.83690464143
91.58013028 182.534491196285
91.60613028 200.596146974502
91.63213028 195.460764136016
91.65813028 202.440012938167
91.68413028 214.843027016054
91.71013028 217.824156708654
91.73613028 215.557296751784
91.76213028 196.500821159722
91.78813028 207.887796618173
91.81413028 220.629142921602
91.84013028 185.821828204203
91.86613028 181.881606578377
91.89213028 208.150421138618
91.91813028 198.870097535985
91.94413028 210.636545810054
91.97013028 207.575860823116
91.99613028 225.450344707681
92.02213028 217.077859255816
92.04813028 202.353164043981
92.07413028 218.186849150306
92.10013028 217.545487520984
92.12613028 216.992400164088
92.15213028 221.621910939065
92.17813028 219.772222789077
92.20413028 214.821834251983
92.23013028 202.36291543063
92.25613028 195.38421143556
92.28213028 194.394133728142
92.30813028 199.363495813494
92.33413028 201.827956626609
92.36013028 209.641490911706
92.38613028 203.544103766296
92.41213028 221.256485638592
92.43813028 209.127383985113
92.46413028 198.701537384985
92.49013028 208.735120687937
92.51613028 202.966868722751
92.54213028 198.960139923743
92.56813028 202.457373694882
92.59413028 213.381188847915
92.62013028 206.554964760855
92.64613028 212.67816702864
92.67213028 212.519501492689
92.69813028 200.860397307147
92.72413028 218.874374595943
92.75013028 212.736494908375
92.77613028 213.850910533008
92.80213028 229
92.82813028 220.255041191808
92.85413028 207
92.88013028 208.510614169927
92.90613028 215.045043748906
92.93213028 223.431235829275
92.95813028 234.001393288953
92.98413028 238.861068835322
93.01013028 218.015873761277
93.03613028 205.183927242255
93.06213028 201.724639642291
93.08813028 237.64829434877
93.11413028 222.901999457215
93.14013028 233.886277533335
93.16613028 236.638674805774
93.19213028 249.155553653463
93.21813028 251.195213295786
93.24413028 275.076498056143
93.27013028 252.999999999863
93.29613028 251.686618832941
93.32213028 242.820508628104
93.34813028 232.17535917634
93.37413028 253
93.40013028 251.207923091498
93.42613028 248.58641814286
93.45213028 271.856559252144
93.47813028 255.230428458696
93.50413028 282.907222192142
93.53013028 270.518384911769
93.55613028 274.239347870721
93.58213028 274.243973715531
93.60813028 260.299488050593
93.63413028 267.405445823178
93.66013028 309.920396109112
93.68613028 286.70062472453
93.71213028 297.142663417555
93.73813028 316.908279717004
93.76413028 354.490937004191
93.79013028 390.334106323394
93.81613028 402.063452496339
93.84213028 453.484320980311
93.86813028 499.037598311691
93.89413028 560.422416171625
93.92013028 707.133514043584
93.94613028 959.505763485703
93.97213028 1342.71864633582
93.99813028 1610.96465975211
94.02413028 1592.0035292568
94.05013028 1251.99241339942
94.07613028 911.018767280964
94.10213028 700.827535979401
94.12813028 613.593470610453
94.15413028 486.544198398166
94.18013028 494.920011748469
94.20613028 525.02011524545
94.23213028 542.787109251828
94.25813028 699.170738454014
94.28413028 845.542663516844
94.31013028 941.20961564353
94.33613028 845.851308839665
94.36213028 665.268006990967
94.38813028 533.542891842742
94.41413028 429.191695422828
94.44013028 361.843356732388
94.46613028 304.201165689682
94.49213028 274.988100549101
94.51813028 264.732156231106
94.54413028 257.801612279178
94.57013028 233.286159734946
94.59613028 206.930444197563
94.62213028 222.811518064504
94.64813028 212.317745885847
94.67413028 224.790460630586
94.70013028 223.070511011661
94.72613028 213.960975384749
94.75213028 224.601721055537
94.77813028 222.506759607662
94.80413028 200.628094931003
94.83013028 206.837039971565
94.85613028 206.023051099497
94.88213028 218.409110410992
94.90813028 220.340564462112
94.93413028 216.968962142682
94.96013028 208.490337552807
94.98613028 219.940278831323
95.01213028 210.874952417539
95.03813028 201.31154887315
95.06413028 206.911638068742
95.09013028 208.137034692189
95.11613028 207.902654478138
95.14213028 200.855859121163
95.16813028 206.594327701353
95.19413028 213.043443978233
95.22013028 204.153527898609
95.24613028 192.828576071754
95.27213028 196.690460374454
95.29813028 189.895026039429
95.32413028 191.917650229518
95.35013028 220.38978551661
95.37613028 217
95.40213028 207.035412110362
95.42813028 200.700108520129
95.45413028 206.069801346428
95.48013028 202.781364264847
95.50613028 212.751003983483
95.53213028 210.709782707563
95.55813028 193.974620396066
95.58413028 191.632490813837
95.61013028 226.679064107075
95.63613028 227.718766298166
95.66213028 216.048698802451
95.68813028 193.348851408237
95.71413028 187.844946043552
95.74013028 213.424187773431
95.76613028 205.342325604445
95.79213028 202.065427093377
95.81813028 202.179220711613
95.84413028 195.232560940907
95.87013028 197.343870730803
95.89613028 194.040008427161
95.92213028 208.802831175703
95.94813028 224.383795910843
95.97413028 184.269830461479
96.00013028 213.138560750018
96.02613028 193.947617541209
96.05213028 204.33707078023
96.07813028 212.414903994523
96.10413028 218.821685901078
96.13013028 205.13165151082
96.15613028 163.147002094729
96.18213028 176.170984923288
96.20813028 212.847998159231
96.23413028 193.92554420597
96.26013028 183.473466958746
96.28613028 179.634497500171
96.31213028 198.04924709603
96.33813028 184.42011370869
96.36413028 175.769061384789
96.39013028 191.267008307773
96.41613028 198.366882768016
96.44213028 210.743807576734
96.46813028 196.790570844425
96.49413028 172.038628158968
96.52013028 204.621575174966
96.54613028 222.614985192611
96.57213028 191.033296135409
96.59813028 182.32987437348
96.62413028 175.358096124867
96.65013028 200.350870190107
96.67613028 192.710011744296
96.70213028 194.757229598966
96.72813028 206.819005125298
96.75413028 186.418433252181
96.78013028 175.996213102803
96.80613028 203.140395605196
96.83213028 208.738930140162
96.85813028 189.230516117512
96.88413028 206.390891637913
96.91013028 175.572374114243
96.93613028 193.893276992631
96.96213028 202.279414428691
96.98813028 198.950343427045
97.01413028 206.000090220092
97.04013028 208.790086729428
97.06613028 182.474409147224
97.09213028 190.404842885293
97.11813028 195.760319851683
97.14413028 189.996819527186
97.17013028 179.854772068279
97.19613028 209.874883827226
97.22213028 210.469909098285
97.24813028 176.15024767143
97.27413028 169.60628876955
97.30013028 187.889867483077
97.32613028 202.49035662134
97.35213028 199.960827033958
97.37813028 201.627678481072
97.40413028 196.837079033857
97.43013028 214.802579583956
97.45613028 214.373399037543
97.48213028 192.086213867012
97.50813028 186.668912777757
97.53413028 196.820321214918
97.56013028 183.06749191051
97.58613028 177.562341607694
97.61213028 183.571796292633
97.63813028 192.428110000772
97.66413028 196.240241462651
97.69013028 190.205794095784
97.71613028 194.981606834603
97.74213028 196.778151702749
97.76813028 195.073575222861
97.79413028 197.497659755438
97.82013028 200.446925663864
97.84613028 197.245060768416
97.87213028 198.033747235891
97.89813028 195.89637421835
97.92413028 195.676405886319
97.95013028 177.346706830487
97.97613028 157.509978217523
98.00213028 199.265895213364
98.02813028 213.108722720704
98.05413028 200.131418987583
98.08013028 186.606804973835
98.10613028 185.233454532833
98.13213028 184.373350441002
98.15813028 176.277724437922
98.18413028 165.949081981735
98.21013028 182.902421954912
98.23613028 191.326774586493
98.26213028 182.532345693311
98.28813028 198.276333710239
98.31413028 205.618217748351
98.34013028 193.351776802788
98.36613028 205.817195386403
98.39213028 216.146812120373
98.41813028 195.357947773961
98.44413028 183.168624329578
98.47013028 171.932327649286
98.49613028 191.784163863504
98.52213028 218.917422118006
98.54813028 190.141624961216
98.57413028 190.479414940941
98.60013028 201.663009905604
98.62613028 191.815173118049
98.65213028 191.524713768109
98.67813028 196.474734451818
98.70413028 208.224699978966
98.73013028 201.38752119075
98.75613028 187.21693877139
98.78213028 195.877051885231
98.80813028 199.807954156272
98.83413028 184.581728119481
98.86013028 198.668683741019
98.88613028 206.4552672543
98.91213028 222.983861626204
98.93813028 233.421775096662
98.96413028 209.939095510577
98.99013028 192.45914785809
99.01613028 201.568090081163
99.04213028 190.651755016139
99.06813028 214.854668827425
99.09413028 205.863036459381
99.12013028 184.081326896178
99.14613028 173.149808666488
99.17213028 193.505633492489
99.19813028 192.066927109687
99.22413028 183.390472626828
99.25013028 188.680151159958
99.27613028 208.672160915637
99.30213028 204.438916351019
99.32813028 199.415375088758
99.35413028 186.301962344667
99.38013028 200.250366750444
99.40613028 202.887158104504
99.43213028 220.544716238442
99.45813028 218.663432403298
99.48413028 187.133915836669
99.51013028 209.11900589368
99.53613028 214
99.56213028 194.964639972676
99.58813028 203.265530846494
99.61413028 191.459964250678
99.64013028 211.137866666815
99.66613028 223.303481429502
99.69213028 203.993652075122
99.71813028 218.738446025172
99.74413028 230.307178106477
99.77013028 204.314897690645
99.79613028 200.906589726238
99.82213028 184.789964420049
99.84813028 206.739165224654
99.87413028 213.748658971792
99.90013028 192.438232727303
99.92613028 193.641971540205
99.95213028 208.860639364641
99.97813028 214.668867667709
100.00413028 210.38738237411
100.03013028 193.721492184
100.05613028 191.751907109674
100.08213028 194.370821502617
100.10813028 212.577686144026
100.13413028 197.798641774576
100.16013028 200.181171828398
100.18613028 217.126425289394
100.21213028 221.738701103424
100.23813028 213.316039387821
100.26413028 212.156946942423
100.29013028 212.05179858943
100.31613028 198.82207630948
100.34213028 183.580621998068
100.36813028 193.641064927515
100.39413028 222.772996632899
100.42013028 210.990565308902
100.44613028 192.373463216123
100.47213028 203.803441086478
100.49813028 190.653549173004
100.52413028 183.814985704854
100.55013028 194.593073229039
100.57613028 188.881309876664
100.60213028 198.18392026926
100.62813028 203.529465408805
100.65413028 198.87621642411
100.68013028 201.396136927976
100.70613028 200.955217377121
100.73213028 202.856636451472
100.75813028 192.09122663374
100.78413028 176.277446804641
100.81013028 184.837920542742
100.83613028 201.292839937419
100.86213028 194.35339308072
100.88813028 195.361273111187
100.91413028 204.585041361166
100.94013028 195.655770950078
100.96613028 215.66543560313
100.99213028 200.697357518108
101.01813028 177
101.04413028 186.958039530818
101.07013028 218.529839309954
101.09613028 222.702563745781
101.12213028 204.858294352952
101.14813028 214.113103021523
101.17413028 222.450693492411
101.20013028 208.544561839774
101.22613028 194.466757228259
101.25213028 210.644077980894
101.27813028 216.445222652336
101.30413028 204.766400602762
101.33013028 189.880880405965
101.35613028 222.137567403726
101.38213028 190.99191604909
101.40813028 215.399159515623
101.43413028 206.377604945931
101.46013028 225.206593981117
101.48613028 228.587369865604
101.51213028 241.66333264894
101.53813028 214.602927856547
101.56413028 196.300313977447
101.59013028 188.791647437821
101.61613028 236.905919123282
101.64213028 214.049069217097
101.66813028 243.449871052166
101.69413028 221.503868863668
101.72013028 256.890000251955
101.74613028 230.157902151661
101.77213028 214.252328326728
101.79813028 231.537529365961
101.82413028 232
101.85013028 217.683060972476
101.87613028 237.779886803571
101.90213028 247.411562149909
101.92813028 261.870435861339
101.95413028 263
101.98013028 236.759316971135
102.00613028 204.467348070626
102.03213028 204.540026215052
102.05813028 221.626600962454
102.08413028 196.314817004797
102.11013028 225.354347364717
102.13613028 225.082778315943
102.16213028 220.658419636578
102.18813028 226.60378238619
102.21413028 231.262202022768
102.24013028 198.163615049365
102.26613028 196.365647364234
102.29213028 189.356380092578
102.31813028 180.793109317074
102.34413028 198.9144151124
102.37013028 201.219916248986
102.39613028 210.445322406697
102.42213028 211.791483504882
102.44813028 187.033754208876
102.47413028 213.81637899383
102.50013028 205.395030806564
102.52613028 191.124619037008
102.55213028 185.56719648934
102.57813028 188.736468866852
102.60413028 188.999851648993
102.63013028 199.822288838954
102.65613028 191.768826300286
102.68213028 182.08915228233
102.70813028 174.102703586941
102.73413028 195.918395470521
102.76013028 196.820440963028
102.78613028 206.112322204709
102.81213028 211.364608907899
102.83813028 205.422584516266
102.86413028 186.272724691965
102.89013028 178.69085078285
102.91613028 191.667080483848
102.94213028 196.386821059776
102.96813028 198.166824124958
102.99413028 183.392021239685
103.02013028 171.063675485303
103.04613028 180.478408573898
103.07213028 184.5356554485
103.09813028 188.738310695019
103.12413028 195
103.15013028 205.542003373374
103.17613028 204.54722959479
103.20213028 190.631020325552
103.22813028 190.999932334925
103.25413028 187
103.28013028 202.5319873742
103.30613028 214.232016133827
103.33213028 197.222216150525
103.35813028 198.652787424716
103.38413028 197.833337246713
103.41013028 194.746000751021
103.43613028 203.952391736927
103.46213028 199.964317229344
103.48813028 199.622939861136
103.51413028 209.874922889513
103.54013028 213.214377743718
103.56613028 201.607356753907
103.59213028 194.793379977358
103.61813028 207.321519762283
103.64413028 203
103.67013028 207.158433937973
103.69613028 216.250221886042
103.72213028 207.279827392119
103.74813028 199.47675415891
103.77413028 184.74362016355
103.80013028 194.214768152124
103.82613028 183.806998947049
103.85213028 200.904460730524
103.87813028 212.249428048473
103.90413028 221.881955363329
103.93013028 194.911170460998
103.95613028 186.864381151797
103.98213028 204.971684542022
104.00813028 213.858104378495
104.03413028 196.871680799288
104.06013028 225.333203197198
104.08613028 224.459909606384
104.11213028 194.733239797482
104.13813028 211.918699145345
104.16413028 209.715185882686
104.19013028 192.201068496613
104.21613028 182.782834753147
104.24213028 232.293920942535
104.26813028 193.570409051441
104.29413028 210.60819221503
104.32013028 193.213206518509
104.34613028 210.998077485998
104.37213028 210.00799977858
104.39813028 217.85662343071
104.42413028 214.11137745497
104.45013028 203.415433219566
104.47613028 252.520174656893
104.50213028 224.843559727603
104.52813028 223
104.55413028 219.309823306602
104.58013028 192.533965457734
104.60613028 219.789086410159
104.63213028 206.930008679111
104.65813028 208.531420012093
104.68413028 205.508269158234
104.71013028 217.945156267905
104.73613028 220
104.76213028 268.90361829627
104.78813028 233.004848833808
104.81413028 210.003538791931
104.84013028 208.626797909904
104.86613028 195.340896739709
104.89213028 211.045304874921
104.91813028 194.841933915406
104.94413028 192.868548923127
104.97013028 226.079074665838
104.99613028 214.1379092156
105.02213028 194.352970583025
105.04813028 219.360824571967
105.07413028 203.932460418171
105.10013028 176.145599271592
105.12613028 197.170149462184
105.15213028 212.471657219864
105.17813028 199.627407820785
105.20413028 200.41935544691
105.23013028 204.664564566228
105.25613028 214.819634104699
105.28213028 203.237280492313
105.30813028 207.965549146641
105.33413028 206.62686906147
105.36013028 207.764484136523
105.38613028 207.159753514091
105.41213028 221.853255544722
105.43813028 195.377709112004
105.46413028 191.585821252753
105.49013028 203.34658359577
105.51613028 220.661354565392
105.54213028 230.908538281765
105.56813028 213.75292998399
105.59413028 194.012603068367
105.62013028 205.62920710017
105.64613028 222.470960575387
105.67213028 231.405368623839
105.69813028 210.926422215862
105.72413028 174.143753956932
105.75013028 181.720730435714
105.77613028 196.280982110073
105.80213028 211.495675624134
105.82813028 200.382537952049
105.85413028 184.336470403608
105.88013028 214.831101523635
105.90613028 216.494640654287
105.93213028 198.273421336442
105.95813028 190.027624861267
105.98413028 202.521816976343
106.01013028 211.467583155123
106.03613028 214.713946992398
106.06213028 204.894361484245
106.08813028 195.799511886266
106.11413028 212.455867630911
106.14013028 200.269137303491
106.16613028 196.545397300888
106.19213028 178.728162852099
106.21813028 179.625523443829
106.24413028 200.722404844454
106.27013028 200.535345725928
106.29613028 200.968997718468
106.32213028 207.417474556451
106.34813028 227.435384532094
106.37413028 201.823869541103
106.40013028 208.436122800113
106.42613028 208.959304462625
106.45213028 210.748287631906
106.47813028 222.890623183583
106.50413028 179.1025612838
106.53013028 201.200548805826
106.55613028 212.71975359669
106.58213028 192.823501687731
106.60813028 211.912344247487
106.63413028 227.424784663551
106.66013028 212.020254062092
106.68613028 227.326748544979
106.71213028 226.040244436886
106.73813028 193.741007052837
106.76413028 229.30892366691
106.79013028 199.453767237998
106.81613028 218.940695281248
106.84213028 215.925938100867
106.86813028 176.828662805351
106.89413028 197.797521707066
106.92013028 223.901922257876
106.94613028 218.970920232471
106.97213028 216.000687110215
106.99813028 220.949243353401
107.02413028 219.040147243803
107.05013028 207.3599509738
107.07613028 197.399182070645
107.10213028 214.102871006369
107.12813028 207.478102337823
107.15413028 205.139370169619
107.18013028 208.681570490437
107.20613028 217.194232970248
107.23213028 213.497259812771
107.25813028 226.359386172961
107.28413028 228.880703452283
107.31013028 220.292188402988
107.33613028 213.834846797283
107.36213028 217.254682872689
107.38813028 204.543771488694
107.41413028 211.973103872499
107.44013028 203.324793941688
107.46613028 202.622494808424
107.49213028 219.827827344237
107.51813028 208.171943619028
107.54413028 196.966675261798
107.57013028 189.5990923628
107.59613028 226.843433006505
107.62213028 234.489718107666
107.64813028 200.361180329711
107.67413028 200.709905016942
107.70013028 220.882828961498
107.72613028 207.775339083322
107.75213028 208.425226229765
107.77813028 195.387682562418
107.80413028 208.467728019526
107.83013028 215.310658767723
107.85613028 203.401391752201
107.88213028 200.609962891625
107.90813028 225.132463491685
107.93413028 234.204123173543
107.96013028 207.091046193532
107.98613028 205.48163415676
108.01213028 215.808637779995
108.03813028 230.045053283165
108.06413028 226.756271828457
108.09013028 205.391527590419
108.11613028 208.390181972784
108.14213028 214.127125420368
108.16813028 214.260073027055
108.19413028 213.266037516508
108.22013028 215.758510112802
108.24613028 214.837056478832
108.27213028 209.503656334183
108.29813028 212.962404249607
108.32413028 215.032376501961
108.35013028 203.574431958255
108.37613028 197.103638802416
108.40213028 208.448538455291
108.42813028 210.114651634382
108.45413028 226.14421459168
108.48013028 238.028880258814
108.50613028 219.972268411375
108.53213028 224.573399549803
108.55813028 239.936533557683
108.58413028 260.923634712729
108.61013028 231.889339183269
108.63613028 214.848094427078
108.66213028 219.936053854402
108.68813028 208.691889239189
108.71413028 222.970407514684
108.74013028 219.126376692841
108.76613028 232.21840669841
108.79213028 234.071945924175
108.81813028 246.960201541052
108.84413028 215.009754873139
108.87013028 198.029879652868
108.89613028 210.513862307816
108.92213028 218.399217646431
108.94813028 207.702443997677
108.97413028 220.007825386158
109.00013028 233.225832141898
109.02613028 229.465893164355
109.05213028 213.411975113354
109.07813028 215.980326320765
109.10413028 222.233715658856
109.13013028 225.303614198395
109.15613028 199.820443524295
109.18213028 231.814769688881
109.20813028 240.116671341484
109.23413028 201.911441121286
109.26013028 215.012873728657
109.28613028 218.966139988989
109.31213028 197.494704832862
109.33813028 209.709472984987
109.36413028 207.521520274535
109.39013028 214.077968544438
109.41613028 226.329245394076
109.44213028 217.571531680112
109.46813028 227.188923501718
109.49413028 231.111925748543
109.52013028 232.931934679621
109.54613028 195
109.57213028 195.045250230619
109.59813028 200.985716475129
109.62413028 234.581702077954
109.65013028 199.800106215089
109.67613028 201.903557604331
109.70213028 199.126209273414
109.72813028 213.220119244203
109.75413028 234.637884454712
109.78013028 171.028564488455
109.80613028 217.42150002454
109.83213028 197.475392959245
109.85813028 191.406414053178
109.88413028 208.769483882476
109.91013028 200.457377181495
109.93613028 204.211777653766
109.96213028 188.684560988795
109.98813028 210.614765690127
110.01413028 214.161137268784
110.04013028 207.368476490923
110.06613028 215.009199606582
110.09213028 233.181917069424
110.11813028 253.782644778679
110.14413028 234.32246195075
110.17013028 206.178788679655
110.19613028 206.155253465159
110.22213028 218.632781467892
110.24813028 221.250437902018
110.27413028 226.177478637802
110.30013028 208.297627153898
110.32613028 204.598976101187
110.35213028 196.06177901282
110.37813028 196.199703810444
110.40413028 210.420510164861
110.43013028 211.239257650622
110.45613028 202.298162426706
110.48213028 202.301307323739
110.50813028 224.810853509184
110.53413028 236.640416879584
110.56013028 228.173075781964
110.58613028 213.070843289266
110.61213028 214.32780002207
110.63813028 229.212371057386
110.66413028 221.229864583093
110.69013028 215.647064992757
110.71613028 213.290391684866
110.74213028 211.244154155727
110.76813028 210.7955350146
110.79413028 222.529848844207
110.82013028 225.499653421006
110.84613028 218.521349368605
110.87213028 211.328593859645
110.89813028 219.546648286701
110.92413028 228.60942761881
110.95013028 220.555019405163
110.97613028 205.319600734776
111.00213028 199.236312262313
111.02813028 217.682186449086
111.05413028 224.348173832283
111.08013028 219.703853793887
111.10613028 231.08591972647
111.13213028 237.870487944379
111.15813028 224.011409288132
111.18413028 222.291685219463
111.21013028 224.943369083923
111.23613028 230.197065583441
111.26213028 225.053336742787
111.28813028 250.468692763026
111.31413028 251.229770876496
111.34013028 237.010657999344
111.36613028 226.551938686707
111.39213028 230.870187756084
111.41813028 217.938821363791
111.44413028 222.174471632183
111.47013028 254.954640480765
111.49613028 233.012425189437
111.52213028 236.094881687276
111.54813028 207.603424067074
111.57413028 235.601079055377
111.60013028 248.795148092697
111.62613028 231.421110541474
111.65213028 225.412748957285
111.67813028 245.738623904089
111.70413028 232.030431432934
111.73013028 229.103948524989
111.75613028 237.307313436747
111.78213028 254.313174685345
111.80813028 258.223958224434
111.83413028 241.989884246463
111.86013028 232.774881009835
111.88613028 213.866864980128
111.91213028 231.008738046482
111.93813028 261.790773839643
111.96413028 259.621236849613
111.99013028 255.915231504985
112.01613028 254.401230380529
112.04213028 247.973858647782
112.06813028 261.394982210025
112.09413028 252.307300415988
112.12013028 279.789057807355
112.14613028 274.90845062293
112.17213028 309.341564781403
112.19813028 266.951488610733
112.22413028 258.040789243969
112.25013028 245.187907600406
112.27613028 273.293075021917
112.30213028 311.662338377429
112.32813028 303.442213085451
112.35413028 332.32154836507
112.38013028 301.242306279797
112.40613028 344.374578871807
112.43213028 376.398775154988
112.45813028 371.750662171625
112.48413028 407.746042374574
112.51013028 425.294839650761
112.53613028 462.932414382896
112.56213028 516.522771260355
112.58813028 559.118786391218
112.61413028 730.093527246261
112.64013028 902.240900680926
112.66613028 1010.19852212519
112.69213028 1265.52504583128
112.71813028 1530.4194073155
112.74413028 1777.0674144967
112.77013028 1911.21966977972
112.79613028 1885.81499965085
112.82213028 1709.34191193022
112.84813028 1402.50683446022
112.87413028 1121.93620498109
112.90013028 867.677983316356
112.92613028 782.083284985964
112.95213028 673.094598931483
112.97813028 619.553293838617
113.00413028 607.719808240997
113.03013028 562.351638911376
113.05613028 585.711133447729
113.08213028 656.102415494185
113.10813028 766.554288820964
113.13413028 852.484007771245
113.16013028 985.419901890011
113.18613028 1051.77005821758
113.21213028 1091.10524462087
113.23813028 1000.21078964441
113.26413028 887.493973537832
113.29013028 766.226727584219
113.31613028 644.441768957937
113.34213028 547.119071922689
113.36813028 438.610222381397
113.39413028 369.43312974049
113.42013028 356.078084806056
113.44613028 335.306075471703
113.47213028 303.539252371251
113.49813028 284.360867120749
113.52413028 282.99223879242
113.55013028 289.48943094012
113.57613028 282.807370286918
113.60213028 268.895377385558
113.62813028 241.774781255483
113.65413028 245.883989727207
113.68013028 258.448845616588
113.70613028 238.308252138723
113.73213028 244.220225971558
113.75813028 245.970894190945
113.78413028 250.398175703593
113.81013028 242.780416028609
113.83613028 237.15485700899
113.86213028 227.111090287423
113.88813028 238.731910687117
113.91413028 246.185472368611
113.94013028 235.152527579326
113.96613028 248.669325741185
113.99213028 234.207665451955
114.01813028 214.635719883209
114.04413028 233.893648332509
114.07013028 229.581970176853
114.09613028 228.189372040932
114.12213028 218.8308759734
114.14813028 215.35096389669
114.17413028 219.487040818378
114.20013028 214.655109881385
114.22613028 220.916938003011
114.25213028 218.209051767924
114.27813028 232.576786504328
114.30413028 226.764626439663
114.33013028 209.041189186638
114.35613028 202.999761429002
114.38213028 197.094516395172
114.40813028 214.105938704062
114.43413028 221.198175191346
114.46013028 204.690973092244
114.48613028 230.752117077884
114.51213028 212.942347134961
114.53813028 195.832504346853
114.56413028 235.331999882703
114.59013028 244.408901368005
114.61613028 219.330467777101
114.64213028 224.308503730484
114.66813028 239.870097535977
114.69413028 222.682899600816
114.72013028 215.669239007582
114.74613028 186.891147996916
114.77213028 212.330587525204
114.79813028 184.552757640461
114.82413028 225.889887476848
114.85013028 192.227245424626
114.87613028 252.970429144473
114.90213028 234.530565482449
114.92813028 221.473857367154
114.95413028 221.953627140715
114.98013028 230.493343633196
115.00613028 197.383828000156
115.03213028 250.431615778171
115.05813028 270.536945496602
115.08413028 245.783545343608
115.11013028 249.258653696574
115.13613028 242.926631258854
115.16213028 287.460937603226
115.18813028 312.150856657087
115.21413028 345.758551736351
115.24013028 358.600337300852
115.26613028 366.676477037886
115.29213028 375.421736034386
115.31813028 394.923730980591
115.34413028 308.863211777051
115.37013028 294.948704594094
115.39613028 293.860207332689
115.42213028 277.499482515079
115.44813028 247.75158180506
115.47413028 254.34844449258
115.50013028 247.075856055977
115.52613028 239.323316480273
115.55213028 246.704972936056
115.57813028 283.628129581546
115.60413028 275.832905214762
115.63013028 254.478344395328
115.65613028 297.00076687082
115.68213028 291.9678820628
115.70813028 277.002358032455
115.73413028 271.408291457134
115.76013028 270.938108212056
115.78613028 266.274975997067
115.81213028 257.990468115824
115.83813028 237.744462597657
115.86413028 213.660368192099
115.89013028 216.332067547771
115.91613028 237.489553249501
115.94213028 216.44125880143
115.96813028 217.799624661378
115.99413028 223.195084938625
116.02013028 213.546813144869
116.04613028 218.832017670594
116.07213028 241.443899589728
116.09813028 245.07384332188
116.12413028 217.786280763707
116.15013028 211.452428593353
116.17613028 225.847352672563
116.20213028 229.135857419209
116.22813028 213.846695090255
116.25413028 201.372537534905
116.28013028 205.237951095267
116.30613028 222.005373647093
116.33213028 216.473990136023
116.35813028 194.609936850102
116.38413028 198.618275879277
116.41013028 195.347447659779
116.43613028 197.418023775253
116.46213028 190.747232668317
116.48813028 206.162914918381
116.51413028 199.240660473838
116.54013028 205.639184962291
116.56613028 198.122680015748
116.59213028 209.729204795032
116.61813028 187.300182133811
116.64413028 171.273159285199
116.67013028 201.89626749099
116.69613028 205.155334150993
116.72213028 201.863952606338
116.74813028 193.800679624974
116.77413028 216.295333300018
116.80013028 215.266257018984
116.82613028 199.086223401274
116.85213028 192.312100653223
116.87813028 196.361947200641
116.90413028 217.11490322614
116.93013028 208.403736763885
116.95613028 200.293504492501
116.98213028 200.367221093368
117.00813028 229.586083304013
117.03413028 208.63937493675
117.06013028 210.20094270073
117.08613028 201.119993192193
117.11213028 207.609769430673
117.13813028 203.07752697822
117.16413028 190.763716340473
117.19013028 204.398140127813
117.21613028 201.44046752515
117.24213028 223.505572800416
117.26813028 197.962810240037
117.29413028 234.150822006537
117.32013028 190
117.34613028 190.203881116043
117.37213028 195.40110109815
117.39813028 208.125589828271
117.42413028 214.110093454641
117.45013028 223.983694206765
117.47613028 209.13252859549
117.50213028 206.056272596843
117.52813028 234.168285078995
117.55413028 179.238922811748
117.58013028 195.078036209513
117.60613028 201.649319784356
117.63213028 178.709224879713
117.65813028 187.138795834527
117.68413028 208.059301232144
117.71013028 195.570173966938
117.73613028 228.785731544901
117.76213028 228.589902290485
117.78813028 213.174346761539
117.81413028 223.932624351101
117.84013028 222.590989343367
117.86613028 207.680383683197
117.89213028 191.681470736081
117.91813028 193.112428932069
117.94413028 228.127666740945
117.97013028 203.091710748737
117.99613028 204.512626904023
118.02213028 226.569915402186
118.04813028 214.223890559368
118.07413028 213.577712185544
118.10013028 205.21061340155
118.12613028 204.972429783045
118.15213028 215.531406991333
118.17813028 216.106948557609
118.20413028 227.840130224298
118.23013028 209.78719691065
118.25613028 218.724391537035
118.28213028 210.594231433486
118.30813028 206.368256988451
118.33413028 199.371521633589
118.36013028 217.883238438439
118.38613028 220.985616720651
118.41213028 220.437735591544
118.43813028 215.51152078262
118.46413028 204.2447059358
118.49013028 218.125860488548
118.51613028 204.446258547404
118.54213028 201.02441834693
118.56813028 218.467570134358
118.59413028 222.870987641416
118.62013028 210.908322265784
118.64613028 202.544661594129
118.67213028 223.320093458801
118.69813028 220.532136650317
118.72413028 182.434000777388
118.75013028 176.62431059507
118.77613028 197.91090236198
118.80213028 199.723082420401
118.82813028 208.156988565979
118.85413028 211.110935888752
118.88013028 199.919692491632
118.90613028 201.209297311923
118.93213028 194.435516375732
118.95813028 203.937475746154
118.98413028 203.114174492377
119.01013028 195.143737449683
119.03613028 202.479283097293
119.06213028 201.033527733422
119.08813028 216.624017379757
119.11413028 218.562422293507
119.14013028 226.205242315709
119.16613028 215.727860102638
119.19213028 186.345173799664
119.21813028 196.83290777602
119.24413028 210.151960217228
119.27013028 200.321681133951
119.29613028 199.11850271015
119.32213028 219.153501857087
119.34813028 218.973968861641
119.37413028 194.531113776022
119.40013028 185.77074532779
119.42613028 192.198877883587
119.45213028 204.051717903601
119.47813028 198.955665916337
119.50413028 198.734004107047
119.53013028 219.683141658315
119.55613028 206.605237292453
119.58213028 204.812540938808
119.60813028 209.326103058321
119.63413028 226.624963054725
119.66013028 195.361534237207
119.68613028 220.896832291812
119.71213028 202.586457205147
119.73813028 201.790954279838
119.76413028 216.596066288661
119.79013028 231.352529016788
119.81613028 194.374217991301
119.84213028 204.529388209476
119.86813028 180.722904541471
119.89413028 200.31608449787
119.92013028 193.631116593406
119.94613028 233.718292642671
119.97213028 191.31748034807
119.99813028 247.79450004476
120.02413028 206.436597380851
120.05013028 177.265733841697
120.07613028 206.968065064262
120.10213028 200.076907533077
120.12813028 230.351818426338
120.15413028 196.10992952171
120.18013028 192.122261004553
120.20613028 211.935804823915
120.23213028 199.848375546867
120.25813028 196.211561637788
120.28413028 215.310700391279
120.31013028 227.915618426893
120.33613028 238.896838339587
120.36213028 247.118322269955
120.38813028 199.607260486025
120.41413028 206.049185478722
120.44013028 212.300117029999
120.46613028 206.199191092656
120.49213028 209.200894104184
120.51813028 205.848717358724
120.54413028 204.999999999889
120.57013028 195.275056682899
120.59613028 197.00244825255
120.62213028 198
120.64813028 209.709675980199
120.67413028 200.668435635753
120.70013028 222.106415846063
120.72613028 211.978923497551
120.75213028 233.415368115752
120.77813028 226.1862271439
120.80413028 215.673332140855
120.83013028 210.444054913621
120.85613028 222.324067769186
120.88213028 214.173111357743
120.90813028 213.451377116249
120.93413028 199.212503826264
120.96013028 214.155214402889
120.98613028 214.270205287842
121.01213028 208.641732969205
121.03813028 219.740781502593
121.06413028 213.562232319161
121.09013028 208.447864365841
121.11613028 194.346861229158
121.14213028 201.171523682608
121.16813028 212.417800786284
121.19413028 203.415846182991
121.22013028 227.367149941821
121.24613028 234.979462256735
121.27213028 212.234819219001
121.29813028 200.804473495157
121.32413028 199.045330916451
121.35013028 189.745136687126
121.37613028 200.615655795563
121.40213028 218.535507097596
121.42813028 201.510711363027
121.45413028 186.473053995318
121.48013028 195.799502351988
121.50613028 210.078884691391
121.53213028 214.556712882427
121.55813028 219.633742724891
121.58413028 214.296724027703
121.61013028 192.037757122062
121.63613028 199.93312404812
121.66213028 207.434000777383
121.68813028 191.523807155421
121.71413028 210.224283529042
121.74013028 227.275178992282
121.76613028 218.4865541421
121.79213028 197.16096287636
121.81813028 211.343844689283
121.84413028 217.730462753843
121.87013028 215.514378512102
121.89613028 217.347499742828
121.92213028 199.283059947973
121.94813028 188.23480875953
121.97413028 214.057053413536
122.00013028 198.617827340062
122.02613028 198.878616080106
122.05213028 216.061904808704
122.07813028 207.704756920079
122.10413028 214.049940254002
122.13013028 232.731636540316
122.15613028 246.30726227893
122.18213028 224.386037681702
122.20813028 196.706150209031
122.23413028 212.123073910651
122.26013028 213.791202385104
122.28613028 238.178240386084
122.31213028 212.145618340125
122.33813028 212.864303952456
122.36413028 212.50309501985
122.39013028 214.26222806429
122.41613028 201.317787509397
122.44213028 204.576041263307
122.46813028 211.119099600269
122.49413028 221.552916450967
122.52013028 203.602560003164
122.54613028 198.337906241349
122.57213028 204.463954143098
122.59813028 213.890580634816
122.62413028 210.601737562804
122.65013028 196.116399755956
122.67613028 203.147537367515
122.70213028 224.929246930717
122.72813028 226.973723317639
122.75413028 191.830182815419
122.78013028 197.769119515597
122.80613028 203.74256868645
122.83213028 240.939727051257
122.85813028 214.882494122638
122.88413028 211.145344193339
122.91013028 246.778818819197
122.93613028 214.608150591469
122.96213028 202.921950769728
122.98813028 218.865135927077
123.01413028 249.964642533937
123.04013028 228.833969712606
123.06613028 214.705537736886
123.09213028 201.128706122511
123.11813028 214.922518131825
123.14413028 223.796734842604
123.17013028 220.090903890401
123.19613028 244.864332555246
123.22213028 217.469799809671
123.24813028 206.634752578434
123.27413028 215.341922175282
123.30013028 211.851430223799
123.32613028 209.241351070556
123.35213028 200.015280357653
123.37813028 202.171630409964
123.40413028 203.99999999989
123.43013028 198.96728168618
123.45613028 195.581925066929
123.48213028 200.59292139163
123.50813028 197.486456949024
123.53413028 203.830517654281
123.56013028 227.411100590065
123.58613028 216.55779388755
123.61213028 227.433622464508
123.63813028 231.325022978425
123.66413028 232.037273007063
123.69013028 234.380263166699
123.71613028 223.63315280777
123.74213028 211.600969766756
123.76813028 200.920360533322
123.79413028 201.800476629748
123.82013028 197.448119444095
123.84613028 203.884670789675
123.87213028 210.698315288619
123.89813028 191.248886727896
123.92413028 214.660970204782
123.95013028 245.397430462572
123.97613028 238.915267080769
124.00213028 238.504685256256
124.02813028 230.712818315956
124.05413028 219.961649474319
124.08013028 227.121731779509
124.10613028 232.156079392016
124.13213028 220.527784952177
124.15813028 213.411355668325
124.18413028 202.61389557847
124.21013028 199.53680319344
124.23613028 220.063575730945
124.26213028 220.226035137112
124.28813028 215.730559946945
124.31413028 188.183981886567
124.34013028 197.238860269226
124.36613028 222.63824277382
124.39213028 219.537155464813
124.41813028 223.547816025426
124.44413028 233.028202682858
124.47013028 227.05170139634
124.49613028 237.757084734562
124.52213028 229.137799001742
124.54813028 236.907783506474
124.57413028 217.681496777599
124.60013028 202.446154381313
124.62613028 226.575205802187
124.65213028 230.747387992217
124.67813028 230.242689715201
124.70413028 231.69830226786
124.73013028 226.86895583878
124.75613028 207.535993773867
124.78213028 232.466011987243
124.80813028 243.43533942202
124.83413028 220.212587073243
124.86013028 239.692934668518
124.88613028 245.123047869122
124.91213028 255.5398327541
124.93813028 250.561064580455
124.96413028 239.071523426475
124.99013028 253.43700081003
125.01613028 217.069897614291
125.04213028 236.952672856711
125.06813028 202.563131958862
125.09413028 211.273388321915
125.12013028 249.960429652564
125.14613028 285.013258089296
125.17213028 254.862510720836
125.19813028 235.840633407821
125.22413028 253.656784290122
125.25013028 244.268392062467
125.27613028 254.522259467796
125.30213028 222
125.32813028 222
125.35413028 250.556593134314
125.38013028 257.823514708486
125.40613028 255.105403431249
125.43213028 246.405510926983
125.45813028 293.251046887674
125.48413028 259.531152838301
125.51013028 276.428703404403
125.53613028 320.101686760409
125.56213028 299.556042279305
125.58813028 306.849504223294
125.61413028 315.969384640374
125.64013028 360.778244484103
125.66613028 417.20727063182
125.69213028 495.169064970572
125.71813028 556.90208270431
125.74413028 635.377684706527
125.77013028 750.592271493207
125.79613028 855.235175687673
125.82213028 1020.71180917323
125.84813028 934.183457998494
125.87413028 785.060361532839
125.90013028 708.748508059605
125.92613028 594.832603390398
125.95213028 500.454220188935
125.97813028 443.417820780049
126.00413028 409.637068987332
126.03013028 367.116935953989
126.05613028 331.778945540318
126.08213028 342.085919726469
126.10813028 340.939472898218
126.13413028 330.81662802431
126.16013028 315.13473827704
126.18613028 296.990458581551
126.21213028 317.290978115507
126.23813028 325.173830557246
126.26413028 369.807240079319
126.29013028 425.865348456342
126.31613028 465.23307017219
126.34213028 530.651354148225
126.36813028 543.676816288488
126.39413028 555.864009811915
126.42013028 524.878830460065
126.44613028 462.87320429597
126.47213028 427.93260876908
126.49813028 383.660375165094
126.52413028 338.162757033212
126.55013028 298.755475429633
126.57613028 281.628536497217
126.60213028 271.780558331745
126.62813028 265.979248802147
126.65413028 256.876349192993
126.68013028 254.838868778991
126.70613028 256.468722291042
126.73213028 233.117570981166
126.75813028 228.142344160717
126.78413028 224.098287710331
126.81013028 223.010296193732
126.83613028 243.382788618587
126.86213028 236.585228774357
126.88813028 211.597179383066
126.91413028 225.291804042357
126.94013028 232.754842963718
126.96613028 218.217167808128
126.99213028 221.64039432444
127.01813028 233.938285165742
127.04413028 259.019283270829
127.07013028 246.157254103724
127.09613028 219.83899806136
127.12213028 227.070017362405
127.14813028 223.7997123202
127.17413028 214.036408943151
127.20013028 193.637271982556
127.22613028 202.299522701139
127.25213028 243.271579508281
127.27813028 224.495395429576
127.30413028 220.36753430245
127.33013028 228.924457153089
127.35613028 217.806821993351
127.38213028 209.112367314767
127.40813028 231.598302011731
127.43413028 229.809073298447
127.46013028 225.560916229551
127.48613028 210.855410581949
127.51213028 217.256237533314
127.53813028 226.277724437925
127.56413028 213.261043818324
127.59013028 227.656964730318
127.61613028 230.177940197773
127.64213028 218.338580330801
127.66813028 230.422764956465
127.69413028 243.183407551342
127.72013028 246.14494076417
127.74613028 256.556787520509
127.77213028 225.557432081929
127.79813028 234.832233686566
127.82413028 249.410707620399
127.85013028 235.067069412838
127.87613028 207.489450008647
127.90213028 228.889071084243
127.92813028 220.045659707545
127.95413028 238.857136148493
127.98013028 254.720936917432
128.00613028 251.109454940967
128.03213028 225.006722751246
128.05813028 226.858375038785
128.08413028 215.685567355848
128.11013028 226.195365133178
128.13613028 236.230248018503
128.16213028 238.826205018536
128.18813028 206.485512199272
128.21413028 205.679773772317
128.24013028 226.31671952504
128.26613028 232.493653355769
128.29213028 233.86349104636
128.31813028 210.95364364797
128.34413028 216.280111073175
128.37013028 231.339586697847
128.39613028 226.585783115691
128.42213028 244.533110002875
128.44813028 209.606092747327
128.47413028 210.322454977766
128.50013028 208.295323765749
128.52613028 208.548380826253
128.55213028 202.121586915094
128.57813028 206.789112451666
128.60413028 209.744423535382
128.63013028 233.504039769617
128.65613028 208.66936828996
128.68213028 225.300922963121
128.70813028 225.019515794049
128.73413028 216.525939637632
128.76013028 227.328016038065
128.78613028 225.575357639347
128.81213028 220.004864415816
128.83813028 230.137089336496
128.86413028 222.450787199144
128.89013028 199.118042075415
128.91613028 213.138172902883
128.94213028 233.76977105002
128.96813028 227.100794093701
128.99413028 221.191178293315
129.02013028 216.143331459246
129.04613028 213.727233684483
129.07213028 215
129.09813028 224.450299597624
129.12413028 231.45402231625
129.15013028 224.031279914824
129.17613028 217.473866901414
129.20213028 215.96757838799
129.22813028 218.037731080537
129.25413028 207.101745816434
129.28013028 225.10529926512
129.30613028 245.180872565332
129.33213028 229.066801313806
129.35813028 228.456677050515
129.38413028 224.532452420664
129.41013028 223.805157118877
129.43613028 234.696011900472
129.46213028 229.741327234896
129.48813028 211.964672061961
129.51413028 209.397143295026
129.54013028 214.646652029333
129.56613028 214.831324512618
129.59213028 208.143269841934
129.61813028 217.3574541247
129.64413028 221.475318321176
129.67013028 231.376095395364
129.69613028 221.287950405281
129.72213028 192.402004224341
129.74813028 204.307842661792
129.77413028 213.043849968659
129.80013028 229.408017310344
129.82613028 216.604256966913
129.85213028 200.53630698293
129.87813028 208.972242369864
129.90413028 227.510146562184
129.93013028 225.860639364645
129.95613028 235.685392963418
129.98213028 236.033121742977
130.00813028 230.043098679879
130.03413028 233.602605113211
130.06013028 227.469396380502
130.08613028 212.471321455781
130.11213028 229.959249818299
130.13813028 216.749091003746
130.16413028 226.298171960973
130.19013028 224.799235178174
130.21613028 206.93862092961
130.24213028 221.073871924669
130.26813028 225.389905264762
130.29413028 199.183184562482
130.32013028 226.746268850051
130.34613028 213.601850337929
130.37213028 208.372631241503
130.39813028 200.059785347252
130.42413028 202.545754694756
130.45013028 231.720414665381
130.47613028 225.420258573101
130.50213028 238.778942053825
130.52813028 227.969478346969
130.55413028 224.997484082385
130.58013028 215.096707008196
130.60613028 247.353431217774
130.63213028 217.914973865475
130.65813028 244.856310221638
130.68413028 260.259601932819
130.71013028 218.667697367744
130.73613028 223.44636434953
130.76213028 205.5825349778
130.78813028 209.465705751167
130.81413028 227.119544652985
130.84013028 228.108893626636
130.86613028 231.524736323133
130.89213028 232.871261788202
130.91813028 226.109284035042
130.94413028 237.771258045579
130.97013028 245.890464373202
130.99613028 240.347419056999
131.02213028 246.394852927646
131.04813028 230.953711313053
131.07413028 234.216251661175
131.10013028 239.959417237747
131.12613028 241
131.15213028 237.13980568807
131.17813028 225.330368022733
131.20413028 229.521942772226
131.23013028 232.742271984641
131.25613028 239.591147228542
131.28213028 222.494460214095
131.30813028 211.437474465516
131.33413028 206.487085928427
131.36013028 204.307339478267
131.38613028 216.972026353892
131.41213028 216.94465657087
131.43813028 213.337106356011
131.46413028 221.488627568299
131.49013028 232.430490588254
131.51613028 236
131.54213028 234.753591052676
131.56813028 234
131.59413028 240.033598884996
131.62013028 244
131.64613028 235.830785753044
131.67213028 219.675325806429
131.69813028 208.054304972798
131.72413028 218.843710639763
131.75013028 227.824695467963
131.77613028 239.347596010678
131.80213028 231.6126827297
131.82813028 206.803170426308
131.85413028 225.206848134126
131.88013028 232.208271876351
131.90613028 225.138724682939
131.93213028 237
131.95813028 238.857791169427
131.98413028 248.272407996392
132.01013028 239.215871712267
132.03613028 221.781490060722
132.06213028 233.097103464359
132.08813028 237.510982023308
132.11413028 229.950859631335
132.14013028 220.445074301432
132.16613028 217.695486161929
132.19213028 227.252060227707
132.21813028 229.425952402267
132.24413028 226.17195920107
132.27013028 239.273098593113
132.29613028 243.715533742311
132.32213028 246.304107847658
132.34813028 224.102974247225
132.37413028 231.471544444742
132.40013028 226.521155907653
132.42613028 223
132.45213028 221.068530366851
132.47813028 224.246060162466
132.50413028 242.64664598156
132.53013028 227.292269088826
132.55613028 222.779761007682
132.58213028 238.168378785585
132.60813028 251.5966857338
132.63413028 252.121868034872
132.66013028 220.162004819198
132.68613028 231.239483200865
132.71213028 237.996077772654
132.73813028 223.83322098509
132.76413028 225.980277724223
132.79013028 237.738901537356
132.81613028 215.32920633179
132.84213028 232.795976580825
132.86813028 252.937340416014
132.89413028 258.176830589868
132.92013028 242.805354066323
132.94613028 240.912599325743
132.97213028 239.53512970995
132.99813028 234.608004801844
133.02413028 242.481295831396
133.05013028 234.715672558955
133.07613028 248.130848138725
133.10213028 225.916399243702
133.12813028 222.910276869077
133.15413028 218.240670008105
133.18013028 247.943001230637
133.20613028 223.295556288998
133.23213028 227.891277279295
133.25813028 243.493330612426
133.28413028 244.958410870695
133.31013028 267.763725874718
133.33613028 240.843011434038
133.36213028 239.928643992951
133.38813028 262.049320808847
133.41413028 254.003206514338
133.44013028 236.820211926286
133.46613028 233.222090354752
133.49213028 243.548390360515
133.51813028 258.90576379937
133.54413028 265.295939724397
133.57013028 298.272094787335
133.59613028 239.370561301865
133.62213028 230.317684268539
133.64813028 243.292481618306
133.67413028 252.476611855772
133.70013028 235.607953644023
133.72613028 264.168739665983
133.75213028 258.963427123916
133.77813028 266.548309674685
133.80413028 237.321504180272
133.83013028 254.751580879844
133.85613028 249.197591321978
133.88213028 252.762377695826
133.90813028 253.118896605049
133.93413028 264.076010454661
133.96013028 251.489218410643
133.98613028 264.0247601588
134.01213028 262.110613145426
134.03813028 267.730630173275
134.06413028 272.339257906751
134.09013028 262.888522790672
134.11613028 256.71820498383
134.14213028 256
134.16813028 273.389481841807
134.19413028 266.888342350466
134.22013028 266.220541741909
134.24613028 277.730288361417
134.27213028 277.511817484425
134.29813028 292.714685260423
134.32413028 296.454174153648
134.35013028 294.515968748513
134.37613028 299.541674582269
134.40213028 314.357311821573
134.42813028 325.43451000868
134.45413028 308.130861159741
134.48013028 319.605226832995
134.50613028 362.238082938951
134.53213028 381.410704133484
134.55813028 415.166423257044
134.58413028 444.452445100615
134.61013028 447.047478980684
134.63613028 492.953680859791
134.66213028 534.404823816775
134.68813028 541.142569710951
134.71413028 571.507391148338
134.74013028 624.804423973339
134.76613028 651.715031484018
134.79213028 596.664075328754
134.81813028 560.697885817922
134.84413028 555.941747683574
134.87013028 509.818073396327
134.89613028 474.808877276238
134.92213028 419.001694402481
134.94813028 377
134.97413028 373.238457765291
135.00013028 366.821237361868
135.02613028 363.659568306775
135.05213028 339.4750155716
135.07813028 325.737726825656
135.10413028 325.348338690452
135.13013028 300.191078538951
135.15613028 294.612133510883
135.18213028 319.724755903915
135.20813028 333.343616577749
135.23413028 311.210308801495
135.26013028 367.375535006247
135.28613028 331.054252889738
135.31213028 355.873913035968
135.33813028 372.650900486499
135.36413028 366.88431339579
135.39013028 355.437015466821
135.41613028 401.932599234788
135.44213028 374.022908796357
135.46813028 392.122470047549
135.49413028 420.408943916742
135.52013028 365.993560929811
135.54613028 396.193143356078
135.57213028 355.396547330147
135.59813028 307.054575633085
135.62413028 320
135.65013028 317.614263431838
135.67613028 276.95444004681
135.70213028 274.218116969556
135.72813028 228.21152165029
135.75413028 311.352483906736
135.78013028 270.870842777009
135.80613028 249.089133213795
135.83213028 265.762445360915
135.85813028 253.310649233458
135.88413028 280.053085151048
135.91013028 281
135.93613028 228.951463494429
135.96213028 230.682073673714
135.98813028 231.926492442211
136.01413028 257.663964189594
136.04013028 260
136.06613028 264.483627822325
136.09213028 251.697950921744
136.11813028 216.678522786501
136.14413028 225.004380300805
136.17013028 244.140727882783
136.19613028 225.82214746105
136.22213028 255.48767235903
136.24813028 242.972801122925
136.27413028 255.346944476247
136.30013028 242.851501375377
136.32613028 255.74755541165
136.35213028 268.663383806745
136.37813028 244.559626181456
136.40413028 237.767735760905
136.43013028 229.664051848445
136.45613028 250.932517623744
136.48213028 261.951875532643
136.50813028 261.543906818843
136.53413028 259.563751404005
136.56013028 250.501575935018
136.58613028 256.775915979676
136.61213028 269.948646463286
136.63813028 251.611640786872
136.66413028 230.972307473659
136.69013028 235.878858137623
136.71613028 249.432687249038
136.74213028 238.03135106638
136.76813028 245.349415283826
136.79413028 255.618901372181
136.82013028 259.653874477601
136.84613028 263.198113574036
136.87213028 259.286924044506
136.89813028 260.633697614845
136.92413028 262.29213027218
136.95013028 273.86545518392
136.97613028 282.901109351778
137.00213028 263.656216928022
137.02813028 263.888022168428
137.05413028 255.134148359924
137.08013028 249.80244076731
137.10613028 254.503488914737
137.13213028 262.126728038968
137.15813028 266.600321718812
137.18413028 257.11087078496
137.21013028 287.007234543809
137.23613028 293.739992076725
137.26213028 272.082100739989
137.28813028 274.708866560605
137.31413028 282.67047697266
137.34013028 296.410533227968
137.36613028 305.813440578514
137.39213028 322.125509142093
137.41813028 311.388579640878
137.44413028 306.025579112631
137.47013028 329.894190578316
137.49613028 316.211993669735
137.52213028 329.457234878348
137.54813028 348.278872182862
137.57413028 369.818488921
137.60013028 386.848826647347
137.62613028 399.890283933011
137.65213028 407.824491547504
137.67813028 437.029196029147
137.70413028 448.297267909518
137.73013028 499.850965177324
137.75613028 535.595933519742
137.78213028 582.046356352018
137.80813028 607.262162960488
137.83413028 640.654551128286
137.86013028 689.241747526722
137.88613028 709.447631842609
137.91213028 734.11298327339
137.93813028 742.850822163382
137.96413028 652.999547974301
137.99013028 660.102505003476
138.01613028 580.170020179806
138.04213028 615.150534839
138.06813028 577.772039787622
138.09413028 521.667051881055
138.12013028 505.677186703121
138.14613028 501.529321469618
138.17213028 416.767523231414
138.19813028 393.753536408367
138.22413028 380.804928082138
138.25013028 390.746988049547
138.27613028 384.920102893794
138.30213028 347.305465560804
138.32813028 333.038069405893
138.35413028 363.023563817286
138.38013028 364.600227087027
138.40613028 407.918176893296
138.43213028 386.136467330082
138.45813028 384.032250706079
138.48413028 400.557190024432
138.51013028 427.028811668523
138.53613028 423.229461153925
138.56213028 470.209273831687
138.58813028 430.958156717635
138.61413028 456.65456763558
138.64013028 460.828837197778
138.66613028 474.56744459462
138.69213028 476.894574013726
138.71813028 442.498582875362
138.74413028 419.630682000169
138.77013028 422.188842815887
138.79613028 430.6939635906
138.82213028 402.42631072095
138.84813028 361.928309154111
138.87413028 348.399056274766
138.90013028 345.369608653856
138.92613028 341.778906478037
138.95213028 326.683680417625
138.97813028 320.643713614018
139.00413028 315.346960983522
139.03013028 305.578573688196
139.05613028 316.601914516492
139.08213028 277.0013621249
139.10813028 273.037259986292
139.13413028 269.015154561779
139.16013028 250.248599560344
139.18613028 265.88756409492
139.21213028 254.11615513719
139.23813028 236.76552956585
139.26413028 260.051343077211
139.29013028 249.677355047782
139.31613028 228.809854115264
139.34213028 242.102467577199
139.36813028 252.636594406605
139.39413028 211.012968360509
139.42013028 207.586243750438
139.44613028 240.418480923517
139.47213028 244.643326692113
139.49813028 243.108880605875
139.52413028 250.616485208914
139.55013028 255.134276717066
139.57613028 242.069598351202
139.60213028 253.986338481525
139.62813028 259.028341499499
139.65413028 246.472550811793
139.68013028 236.166988983124
139.70613028 228.522813809132
139.73213028 220.046353790746
139.75813028 227.559360643697
139.78413028 256.034592231285
139.81013028 252.494621585771
139.83613028 235.084013719728
139.86213028 238.032637627992
139.88813028 239.49481156022
139.91413028 244.420977772608
139.94013028 249.470528543418
139.96613028 245.534106835646
139.99213028 247.827731076359
140.01813028 240.49683382858
140.04413028 250.164762794316
140.07013028 258.106077520706
140.09613028 251.030744642003
140.12213028 236.046543765216
140.14813028 234.610743708425
140.17413028 228.329003336575
140.20013028 237.296107143847
140.22613028 253.763364994348
140.25213028 243.519088528988
140.27813028 231.49696915872
140.30413028 240.809121895007
140.33013028 239.431435337975
140.35613028 257.992223210396
140.38213028 238.748874987765
140.40813028 240.280891889979
140.43413028 243.055169036704
140.46013028 257.141844463699
140.48613028 242.591347662488
140.51213028 226.400027066027
140.53813028 227.049543797838
140.56413028 228.405068435537
140.59013028 247.381860376123
140.61613028 230.421083574708
140.64213028 277.780700634881
140.66813028 237.561919110098
140.69413028 241
140.72013028 239.793648076379
140.74613028 229.450019403083
140.77213028 218.612649715178
140.79813028 234.908234606944
140.82413028 252.13824149319
140.85013028 230.857952541092
140.87613028 229.061101436872
140.90213028 230.511791442906
140.92813028 240.495082220514
140.95413028 252.125338236509
140.98013028 255.700228268355
141.00613028 242.114899739638
141.03213028 251.918480568104
141.05813028 200.434439782324
141.08413028 228.469969790357
141.11013028 220.253792767258
141.13613028 254.627626398047
141.16213028 239.816744285932
141.18813028 227.695592889279
141.21413028 207.425655700442
141.24013028 236.432248244091
141.26613028 219.842391988874
141.29213028 220.7070342667
141.31813028 254.912053593446
141.34413028 238.702496080702
141.37013028 239.490311511288
141.39613028 220.158921539461
141.42213028 222.116399755958
141.44813028 228.899677000542
141.47413028 228.334222585007
141.50013028 253.511958862334
141.52613028 245.991294042675
141.55213028 231.756294383477
141.57813028 236.138795834525
141.60413028 241.133108978353
141.63013028 256.693744088134
141.65613028 230.462693623007
141.68213028 222.507020733687
141.70813028 238.615349559248
141.73413028 227.859352803059
141.76013028 256.739687476703
141.78613028 268.572357606969
141.81213028 250.402527401636
141.83813028 232.590350829699
141.86413028 251.257846838219
141.89013028 268.7413202619
141.91613028 243.438981454821
141.94213028 227.691425117947
141.96813028 241.176033265798
141.99413028 228.697828612345
142.02013028 233.862055208613
142.04613028 229.249641503181
142.07213028 236.326251409201
142.09813028 249.379014742149
142.12413028 251
142.15013028 243.526181695139
142.17613028 239.129973615586
142.20213028 231.118967756614
142.22813028 213.642297770042
142.25413028 203.394340209855
142.28013028 228.790179510763
142.30613028 250.423123275576
142.33213028 230.814596221678
142.35813028 228.370392031919
142.38413028 238.143915328598
142.41013028 245.367840538534
142.43613028 246.890139068604
142.46213028 245.763564503077
142.48813028 256.094887735041
142.51413028 236.484092868803
142.54013028 227.947568944671
142.56613028 258.726858858094
142.59213028 272.000635952397
142.61813028 247.45169032531
142.64413028 238.613614458676
142.67013028 250.046823959776
142.69613028 256.071443665851
142.72213028 247.691221197501
142.74813028 260.051966934073
142.77413028 234.37806301941
142.80013028 241.03888928499
142.82613028 240.486224425792
142.85213028 241.245841585226
142.87813028 231.347528345627
142.90413028 252.040553234258
142.93013028 271.168279031219
142.95613028 259.911186968243
142.98213028 228.822502293649
143.00813028 223.126198813937
143.03413028 255.961630405779
143.06013028 244.365773160114
143.08613028 252.047891944129
143.11213028 261.961078625438
143.13813028 251.074830620435
143.16413028 222.436180930924
143.19013028 223.916382736441
143.21613028 244.857616776988
143.24213028 254.729334077417
143.26813028 232.444751558096
143.29413028 237.489908082114
143.32013028 251.202316921159
143.34613028 240.540287341069
143.37213028 252
143.39813028 251.605443774167
143.42413028 246.580531777982
143.45013028 233.024328126834
143.47613028 246.515187931703
143.50213028 265.231503416055
143.52813028 237.735413903255
143.55413028 251.648052291287
143.58013028 243
143.60613028 243.269650021281
143.63213028 257.21478373414
143.65813028 279.986571004774
143.68413028 247.346703343982
143.71013028 232.306426817816
143.73613028 226.182104482614
143.76213028 240.395904404732
143.78813028 245.749023338672
143.81413028 221.563058246018
143.84013028 254.408523055123
143.86613028 222.95860177038
143.89213028 240.022540942988
143.91813028 226.696715517953
143.94413028 225
143.97013028 250.530109970255
143.99613028 274.01980552288
144.02213028 255.487399137486
144.04813028 223.930802516696
144.07413028 229.928572841383
144.10013028 224.523365589196
144.12613028 221.358370271653
144.15213028 215.323751998852
144.17813028 241.232989486387
144.20413028 253.537335905004
144.23013028 251.875497224608
144.25613028 245.60157619114
144.28213028 263.793308825798
144.30813028 240.697006171969
144.33413028 263.623207034929
144.36013028 261.832743843081
144.38613028 257.721591938359
144.41213028 250.171633896458
144.43813028 250.508736765977
144.46413028 246.465399515087
144.49013028 254.910444288511
144.51613028 249.248312392788
144.54213028 238.041476354183
144.56813028 239.564951231749
144.59413028 252.917631160987
144.62013028 248.251047812912
144.64613028 252.580273213208
144.67213028 260.224893439921
144.69813028 259.192426717865
144.72413028 246.740559438855
144.75013028 233.173201577852
144.77613028 224.417939602931
144.80213028 230.568199369892
144.82813028 241.317477786821
144.85413028 241.828037312444
144.88013028 240
144.90613028 250.462921734513
144.93213028 266.671909323878
144.95813028 261.927366965607
144.98413028 251.493379208981
145.01013028 252.4834569164
145.03613028 244.9499113951
145.06213028 255.008105580695
145.08813028 267.018819149583
145.11413028 242.130735363882
145.14013028 231.206145441903
145.16613028 243.511001091839
145.19213028 257.210013024927
145.21813028 255.089878454823
145.24413028 239
145.27013028 244.379275868174
145.29613028 244.765142643941
145.32213028 232.093168216261
145.34813028 231.164263097286
145.37413028 232.890896405162
145.40013028 244.326887361621
145.42613028 239.051798589432
145.45213028 234.685222057486
145.47813028 233.085433050206
145.50413028 241.912534221954
145.53013028 256.884568474054
145.55613028 229
145.58213028 225.818002244734
145.60813028 220.573418618326
145.63413028 231
145.66013028 227.939805175808
145.68613028 221.156682329901
145.71213028 228.982229766235
145.73813028 220.056327241163
145.76413028 234.262733809091
145.79013028 257.770542332565
145.81613028 243.955085533475
145.84213028 226.991322645474
145.86813028 238.560212612083
145.89413028 243.493624752974
145.92013028 223
145.94613028 228.302684105477
145.97213028 261.742701455319
145.99813028 238.91537636913
146.02413028 249.210749656981
146.05013028 196.731304262716
146.07613028 216.302929649429
146.10213028 231.532955604193
146.12813028 225.681580024695
146.15413028 237.28125625686
146.18013028 242.223971245216
146.20613028 222.837975187046
146.23213028 252.692035028822
146.25813028 234.985626255034
146.28413028 233.005470840196
146.31013028 216.215181115564
146.33613028 238.480659878988
146.36213028 221.585041361166
146.38813028 241.109083601079
146.41413028 235.366428181042
146.44013028 259.381001434734
146.46613028 242.443829363388
146.49213028 218.970730258013
146.51813028 235.159278933344
146.54413028 230.713708421398
146.57013028 247.762387230097
146.59613028 240.339832241851
146.62213028 225.107603578537
146.64813028 239.308697191445
146.67413028 231.818837705864
146.70013028 235.031047391581
146.72613028 240.142928030078
146.75213028 241.818663313433
146.77813028 245.234964083409
146.80413028 234.01771907595
146.83013028 245.989032278088
146.85613028 230.525646422308
146.88213028 231.921466654729
146.90813028 243.109554695331
146.93413028 237.758720081006
146.96013028 243.132134700589
146.98613028 240.894461238602
147.01213028 231.805596123826
147.03813028 247.447470470942
147.06413028 245.205658765629
147.09013028 254.793470197456
147.11613028 238.568209829376
147.14213028 242.06640741892
147.16813028 235.801867357436
147.19413028 244.599624149129
147.22013028 259.400620469659
147.24613028 249.767065157944
147.27213028 237.658477767383
147.29813028 246.595608215184
147.32413028 246.795525480332
147.35013028 224.286482478264
147.37613028 212.580528291476
147.40213028 220.417877985628
147.42813028 225.439316293443
147.45413028 232.710659792219
147.48013028 230.34657406162
147.50613028 232.025586085631
147.53213028 240.520994535985
147.55813028 245.599650190638
147.58413028 247.49425024589
147.61013028 235.175446835185
147.63613028 229.813053656596
147.66213028 234.528616926923
147.68813028 241.383372487939
147.71413028 245.936153608765
147.74013028 234.375757070009
147.76613028 222.114754875236
147.79213028 217.843543220339
147.81813028 219.823698635176
147.84413028 234.665518850238
147.87013028 253.039976337876
147.89613028 233.188372646883
147.92213028 208.605121030837
147.94813028 223.504897785725
147.97413028 237.772213254812
148.00013028 235.135899042751
148.02613028 237.020696553546
148.05213028 228.418619740151
148.07813028 240.873736082279
148.10413028 243.38382707492
148.13013028 242.455800891045
148.15613028 202.708694729433
148.18213028 242.183497771571
148.20813028 248.52602985773
148.23413028 247.722166273453
148.26013028 234.677571063753
148.28613028 221.064449329108
148.31213028 239.66004544877
148.33813028 236.067017329786
148.36413028 241.22088704025
148.39013028 246
148.41613028 239.572719412558
148.44213028 218.122286120845
148.46813028 249.215535948164
148.49413028 235.461609131401
148.52013028 236.560525821142
148.54613028 230.412452255483
148.57213028 247.116925494501
148.59813028 252.488028116894
148.62413028 234.35535721828
148.65013028 244.679296630311
148.67613028 231.155863376034
148.70213028 221.329577671661
148.72813028 216.163884784426
148.75413028 259.049073628791
148.78013028 208.536693904837
148.80613028 219.51276920716
148.83213028 207.144475717741
148.85813028 251.655974870273
148.88413028 229.08560046963
148.91013028 245.91692149575
148.93613028 207.5775612734
148.96213028 238.208590207946
148.98813028 232.24257694008
149.01413028 250.153053317863
149.04013028 255.727507831269
149.06613028 234.481676705556
149.09213028 245.959197735264
149.11813028 232.348244983854
149.14413028 253.645309898172
149.17013028 239.873978139777
149.19613028 231.798225324648
149.22213028 252.025092436375
149.24813028 255.866123225601
149.27413028 244.013186937736
149.30013028 241.153721359562
149.32613028 236.818218260717
149.35213028 222.777055115611
149.37813028 226.532094101545
149.40413028 236.872484171232
149.43013028 233.423329757292
149.45613028 254.028856778559
149.48213028 258.446354815265
149.50813028 234.992991006446
149.53413028 246.924450180099
149.56013028 251.505888570757
149.58613028 233.308797871027
149.61213028 252.452389531078
149.63813028 243.350490241195
149.66413028 218.315836392602
149.69013028 231.923327551443
149.71613028 247.875219591325
149.74213028 217.120016672433
149.76813028 219.027289097166
149.79413028 236.550816058043
149.82013028 215.08668844773
149.84613028 221.413135879184
149.87213028 236.76792922186
149.89813028 240.854197733187
149.92413028 252.338441514159
149.95013028 268.57154121438
149.97613028 257.93932803379
