# Supplementary material for: Properties of a Prototype Corium of Nuclear Reactor
Source: Hindawi journal article supplement (doi:10.1155/2018/5208510), 2018-09-02
Supplement: f1 [file 5208510.f1.zip › 5208510.f1/Tac_2.xrdml]

<?xml version="1.0" encoding="UTF-8"?>
<xrdMeasurements xmlns="http://www.xrdml.com/XRDMeasurement/1.5" xmlns:xsi="http://www.w3.org/2001/XMLSchema-instance" xsi:schemaLocation="http://www.xrdml.com/XRDMeasurement/1.5 http://www.xrdml.com/XRDMeasurement/1.5/XRDMeasurement.xsd" status="Completed">
	<comment>
		<entry>RT-7 for Corium, 45 kV/40 mA. Divergence slit - 1, antiscatter slit - 2; 5 - 153,0000. Step 0,0262606, time per step 30,6 s. mask - 10</entry>
		<entry>Configuration=Reflection-transmission spinner, Owner=User-1, Creation date=08.12.2014 11:29:11</entry>
		<entry>Goniometer=Theta/Theta; Minimum step size 2Theta:0.0001; Minimum step size Omega:0.0001</entry>
		<entry>Sample stage=Reflection-transmission spinner; Minimum step size Phi:0.1</entry>
		<entry>Diffractometer system=EMPYREAN</entry>
		<entry>Measurement program=C:\PANalytical\Data Collector\Programs\RT-7 -for Corium.xrdmp, Identifier={BD797D80-0950-4105-924F-DCB7646D456E}</entry>
	</comment>
	<sample type="To be analyzed">
		<id></id>
		<name></name>
		<preparedBy></preparedBy>
	</sample>
	<xrdMeasurement measurementType="Scan" status="Completed" sampleMode="Reflection">
		<comment>
			<entry/>
		</comment>
		<usedWavelength intended="K-Alpha">
			<kAlpha1 unit="Angstrom">1.5405980</kAlpha1>
			<kAlpha2 unit="Angstrom">1.5444260</kAlpha2>
			<kBeta unit="Angstrom">1.3922500</kBeta>
			<ratioKAlpha2KAlpha1>0.5000</ratioKAlpha2KAlpha1>
		</usedWavelength>
		<incidentBeamPath>
			<radius unit="mm">240.00</radius>
			<xRayTube id="1010041" name="Empyrean Cu LFF (9430 033 7300x) DK405615">
				<tension unit="kV">45</tension>
				<current unit="mA">40</current>
				<anodeMaterial>Cu</anodeMaterial>
				<focus type="Line">
					<length unit="mm">12.0</length>
					<width unit="mm">0.4</width>
					<takeOffAngle unit="deg">6.0</takeOffAngle>
				</focus>
			</xRayTube>
			<sollerSlit id="21010001" name="Soller slits 0.02 rad.">
				<opening unit="rad">0.0200</opening>
			</sollerSlit>
			<mask id="22080002" name="Fixed incident beam mask 10 mm">
				<distanceToSample unit="mm">144.00</distanceToSample>
				<width unit="mm">6.60</width>
			</mask>
			<antiScatterSlit id="22010002" name="Fixed slit 2°" xsi:type="fixedAntiScatterSlitType">
				<height unit="mm">3.03</height>
			</antiScatterSlit>
			<divergenceSlit id="22010003" name="Fixed slit 1°" xsi:type="fixedDivergenceSlitType">
				<distanceToSample unit="mm">153.00</distanceToSample>
				<height unit="mm">1.52</height>
			</divergenceSlit>
		</incidentBeamPath>
		<diffractedBeamPath>
			<radius unit="mm">240.00</radius>
			<sollerSlit id="21020002" name="Large Soller slits 0.02 rad.">
				<opening unit="rad">0.0200</opening>
			</sollerSlit>
			<monochromator id="23010033" name="Diffracted beam monochr. for PIXcel and Cu" hybrid="false">
				<crystal type="Symmetric" shape="Flat">C</crystal>
				<numberOfReflections>1</numberOfReflections>
				<hkl>
					<h>0</h>
					<k>0</k>
					<l>2</l>
				</hkl>
			</monochromator>
			<filter id="20030001" name="Large beta-filter Nickel">
				<material>Ni</material>
				<thickness unit="mm">0.020</thickness>
			</filter>
			<detector id="7010019" name="PIXcel1D-Medipix3 detector" xsi:type="rtmsDetectorType">
				<phd>
					<lowerLevel unit="%">40.0</lowerLevel>
					<upperLevel unit="%">60.0</upperLevel>
				</phd>
				<mode>Scanning</mode>
				<activeLength unit="deg">3.3473</activeLength>
			</detector>
		</diffractedBeamPath>
		<scan appendNumber="0" mode="Continuous" scanAxis="Gonio" status="Completed">
			<header>
				<startTimeStamp>2017-04-14T11:16:15+06:00</startTimeStamp>
				<endTimeStamp>2017-04-14T11:27:18+06:00</endTimeStamp>
				<author>
					<name>EmpyreanUser</name>
				</author>
				<source>
					<applicationSoftware version="5.1a">Data Collector</applicationSoftware>
					<instrumentControlSoftware version="7.6  20140701">EMPYREAN</instrumentControlSoftware>
					<instrumentID>0000000011164593</instrumentID>
				</source>
			</header>
			<dataPoints>
				<positions axis="2Theta" unit="deg">
					<startPosition>10.01813028</startPosition>
					<endPosition>149.98694178</endPosition>
				</positions>
				<positions axis="Omega" unit="deg">
					<startPosition>5.00906514</startPosition>
					<endPosition>74.99347089</endPosition>
				</positions>
				<positions axis="Phi" unit="deg">
					<commonPosition>0.0</commonPosition>
				</positions>
				<commonCountingTime unit="seconds">27.540</commonCountingTime>
				<intensities unit="counts">1081 956 1054 1054 1101 1020 1003 1057 1025 1070 971 996 1025 1058 987 979 1067 976 975 996 1003 963 1008 1007 950 1014 975 1049 1019 1005 1070 1050 1005 939 938 991 957 922 1009 958 975 927 926 1010 913 986 949 958 985 957 934 925 998 919 997 956 949 928 923 922 942 912 938 885 916 913 874 916 890 900 883 935 912 941 880 888 935 905 885 903 843 872 858 867 904 912 906 817 878 893 871 873 919 847 861 836 832 867 836 876 883 840 888 859 819 876 767 840 804 818 769 760 841 798 849 847 794 811 808 814 819 842 847 814 842 808 831 850 798 838 820 803 824 761 790 849 786 872 863 827 752 891 777 859 783 838 800 754 765 766 766 781 804 774 807 777 809 739 779 826 817 744 809 763 733 749 814 782 733 795 785 784 722 721 792 783 725 781 753 787 792 756 755 778 726 731 731 775 734 788 739 764 746 776 731 734 754 767 759 731 684 772 752 773 709 671 714 707 687 677 704 683 716 735 678 750 719 711 711 768 699 722 696 693 708 690 688 637 705 674 711 710 685 672 622 693 664 634 712 681 657 696 705 675 695 705 675 671 601 684 651 665 620 675 674 700 649 706 640 684 704 700 664 684 682 661 643 630 633 644 653 660 674 628 635 634 635 640 682 605 626 616 607 590 568 594 647 618 623 627 614 619 575 603 647 590 615 619 597 584 642 620 615 628 631 588 595 552 609 608 605 602 543 588 610 597 580 586 572 639 611 568 581 568 569 573 562 580 591 530 590 561 574 538 578 507 534 553 570 532 538 579 514 522 513 566 564 515 541 555 565 525 498 533 526 611 557 536 545 522 522 509 538 542 527 524 519 517 542 559 500 580 551 507 546 504 561 539 533 504 528 492 452 497 550 449 528 482 498 468 544 505 528 519 489 502 523 528 454 517 478 478 495 430 502 470 508 518 491 490 442 501 453 490 480 455 488 460 521 457 464 453 454 502 517 455 472 437 498 473 491 470 474 513 476 494 459 467 470 491 512 547 513 530 506 422 472 475 487 455 448 452 462 425 454 443 483 455 435 438 455 465 453 443 429 445 470 423 414 456 420 461 416 437 386 442 417 411 462 443 418 415 421 419 427 404 426 449 405 424 439 450 426 419 447 386 417 423 375 427 386 444 418 406 436 420 440 398 381 424 404 417 383 458 438 399 401 425 398 409 376 387 432 381 410 410 371 406 398 380 404 394 407 382 408 389 374 400 385 401 390 397 361 390 393 392 387 387 396 401 389 359 377 386 361 409 389 383 379 386 355 369 378 398 385 394 367 365 362 393 330 360 363 404 358 409 402 363 384 374 388 366 374 376 405 422 406 377 417 395 388 359 369 356 388 360 369 384 342 372 365 351 369 378 369 383 378 357 390 346 371 359 352 392 352 402 354 339 359 375 351 344 358 363 356 336 343 338 345 353 358 351 386 348 363 337 351 355 356 394 335 383 365 373 375 361 380 378 383 338 359 402 389 369 404 401 426 486 422 477 500 482 454 466 488 547 514 543 554 609 592 650 629 700 732 762 797 970 956 1010 1118 1141 1270 1511 1623 1842 1998 2345 2827 3551 4976 9119 17946 20397 14771 14277 9977 5368 2972 1601 1168 968 875 656 646 579 506 470 489 468 403 455 457 436 431 375 406 414 408 397 412 380 366 340 359 369 378 395 368 366 384 348 338 359 392 433 439 445 447 417 399 396 383 342 330 358 329 328 338 336 355 364 370 353 355 335 352 338 301 333 341 338 330 342 295 342 304 353 336 314 333 298 354 319 324 356 339 317 318 327 330 331 323 298 308 295 326 336 344 331 322 353 296 314 329 310 321 338 338 333 322 291 303 320 305 300 325 325 320 308 390 352 359 362 381 349 337 334 334 344 305 292 295 274 348 286 292 277 300 316 289 306 272 314 276 321 292 297 313 328 316 323 300 332 312 327 335 321 320 345 351 386 402 403 474 477 502 553 652 661 695 906 1468 2762 2691 1458 1564 1664 814 496 432 404 331 394 350 295 330 313 300 300 295 239 285 296 301 294 284 261 306 285 305 287 268 310 292 264 310 273 286 308 254 246 279 290 247 269 284 253 291 269 242 299 285 280 281 316 285 280 314 327 343 342 326 323 343 395 383 435 410 429 409 372 345 349 335 355 333 289 297 317 345 264 308 280 336 296 297 330 302 320 346 340 348 312 290 337 318 324 333 306 326 316 335 347 389 379 399 436 445 490 503 517 609 689 712 771 864 945 929 990 860 805 797 683 558 458 412 385 360 315 302 313 302 284 312 288 288 308 309 311 295 289 308 310 318 303 293 318 293 304 294 264 272 280 281 257 215 253 299 265 245 236 211 265 272 281 265 230 249 255 238 260 245 261 231 251 269 261 265 237 256 214 233 228 252 228 231 247 238 266 254 203 261 292 231 267 252 266 259 258 252 269 262 235 250 257 264 284 257 262 285 262 280 298 264 233 231 237 230 254 279 242 242 239 259 272 285 244 266 269 237 238 263 246 237 253 261 273 278 278 268 276 260 283 265 274 249 254 239 256 266 244 220 228 249 214 248 292 220 262 253 278 307 250 255 279 249 253 247 255 280 228 249 243 284 282 283 299 257 229 253 250 250 233 250 250 222 252 232 213 239 248 244 220 253 232 237 207 255 228 233 259 257 264 243 245 275 253 214 246 227 248 270 262 213 256 254 207 238 230 212 211 251 227 232 220 237 243 235 238 232 239 245 211 220 201 269 233 269 263 240 257 232 247 283 252 241 229 283 276 237 255 274 287 264 291 308 335 310 305 337 325 338 375 365 321 350 314 324 330 294 270 262 258 273 239 245 254 207 216 217 248 248 223 244 248 181 217 237 222 222 213 228 226 214 220 232 210 236 224 262 227 224 224 228 239 210 239 206 209 244 248 213 220 212 242 214 239 214 207 230 223 224 214 221 213 233 236 238 225 237 212 216 233 222 228 245 240 264 208 226 253 228 250 220 230 228 245 227 259 242 260 273 290 297 283 284 291 294 286 267 289 277 282 232 244 246 251 272 232 223 213 219 240 204 239 250 218 205 236 235 205 248 264 233 242 207 228 220 248 241 219 218 233 220 229 258 253 265 244 256 240 233 244 264 297 260 278 260 254 262 291 297 254 307 300 302 298 333 284 317 306 350 358 332 368 340 332 348 406 347 372 404 404 421 414 481 497 511 555 678 820 1124 1827 2440 2115 1616 1280 1366 1444 1135 780 548 406 363 319 288 274 266 248 297 254 243 272 268 231 244 257 244 218 235 238 233 206 265 202 207 220 222 225 214 206 214 213 202 229 211 246 210 226 214 236 231 206 207 193 199 195 194 202 247 232 211 237 230 234 222 234 220 234 257 225 209 213 191 218 205 218 241 212 214 198 239 198 212 236 226 196 224 207 231 233 223 187 204 243 212 215 226 238 223 213 227 234 225 208 225 228 242 235 228 218 258 218 231 225 222 232 230 235 243 225 226 242 252 197 221 247 230 207 187 219 204 185 185 225 214 185 207 232 185 196 205 201 192 198 206 235 234 207 201 226 199 239 211 198 219 196 209 196 273 221 214 221 195 210 210 196 230 223 214 225 214 256 207 215 230 235 201 234 201 185 209 181 219 217 209 213 213 230 183 200 199 208 218 233 228 209 210 171 194 219 215 203 206 212 239 242 266 267 261 321 284 284 259 220 263 209 231 249 204 197 233 232 220 223 216 232 221 190 228 195 236 229 216 222 240 208 211 213 194 237 223 239 241 243 215 218 213 188 239 208 192 221 231 215 211 213 233 218 238 266 230 217 215 222 228 225 243 203 178 246 224 217 211 264 237 224 258 247 196 224 240 258 244 241 250 227 250 222 253 264 234 266 230 267 270 247 258 247 294 283 300 326 328 296 308 347 318 326 352 393 377 403 407 394 416 434 465 490 492 479 499 528 591 602 634 737 820 884 904 994 1234 1524 1962 2906 4291 5428 4937 3680 2618 2415 2793 2863 2472 1682 976 641 493 436 395 373 325 324 309 284 290 288 229 248 251 276 299 280 251 225 235 251 229 248 243 257 201 269 266 263 217 251 236 240 249 261 247 252 247 260 262 285 256 285 246 278 245 217 275 262 250 230 252 270 256 239 257 241 272 263 258 296 273 281 289 266 275 290 263 271 251 262 265 244 260 278 268 288 264 266 280 277 300 309 324 357 364 367 435 492 625 801 1142 1786 2588 2277 1885 1452 1215 1274 1469 1372 1047 765 518 407 313 289 263 227 241 224 253 244 235 249 227 234 217 223 211 190 230 232 203 219 192 210 213 204 226 236 201 220 197 208 211 224 173 197 207 216 185 248 197 256 235 235 214 219 217 205 202 169 209 196 192 211 198 186 191 216 251 193 219 229 217 238 191 211 183 209 197 208 211 230 182 210 221 179 249 213 237 224 216 196 216 201 199 197 228 207 208 181 203 207 190 228 194 231 206 215 219 217 193 240 206 185 194 199 183 216 216 187 209 202 232 204 209 210 208 169 201 199 218 239 208 217 213 199 208 216 213 229 229 223 229 218 245 259 242 253 242 217 280 253 252 269 279 276 301 290 291 264 291 255 264 275 269 252 227 215 238 234 204 210 190 204 244 213 208 217 200 220 176 226 186 224 188 194 214 203 210 193 227 203 205 204 214 253 232 197 237 233 233 252 249 236 255 236 226 208 235 252 220 254 228 210 232 183 234 236 223 205 230 224 239 247 212 237 241 235 222 230 213 223 211 223 228 199 173 217 230 220 182 231 232 250 199 218 205 225 249 231 238 193 239 243 200 249 240 209 217 198 193 197 209 198 190 199 214 184 209 195 202 216 212 200 188 230 225 180 197 209 212 217 225 202 182 220 202 169 196 216 178 196 202 199 183 206 175 224 190 204 176 207 185 191 211 211 204 196 209 218 189 240 177 193 193 210 219 214 195 202 220 203 185 168 171 202 189 239 207 201 203 184 194 231 210 210 192 199 215 221 198 200 196 205 205 224 200 216 204 187 181 217 200 213 215 187 192 219 224 224 230 217 201 197 218 209 240 202 208 235 238 251 233 235 256 235 257 238 270 308 283 310 293 374 407 470 667 1049 1313 993 671 457 448 519 631 694 714 460 343 289 260 271 269 270 231 237 239 202 203 218 234 224 221 233 214 198 193 216 220 208 205 232 214 196 197 190 158 206 213 212 183 218 183 201 197 198 210 188 203 219 202 180 220 208 205 182 196 205 205 227 249 217 207 240 211 214 213 203 201 231 212 201 228 222 201 231 203 219 208 218 210 194 209 207 205 204 173 206 199 216 186 178 190 203 188 183 204 185 203 207 200 210 210 215 223 206 184 180 206 202 214 206 231 227 184 213 224 214 212 207 224 214 205 185 183 213 211 198 192 192 202 207 196 222 205 214 209 201 222 213 216 209 224 212 189 207 206 207 219 198 178 192 210 205 243 201 213 192 196 196 219 226 212 220 224 191 232 188 203 194 183 212 199 239 212 209 200 218 213 209 207 219 201 194 211 222 198 235 207 248 201 199 174 244 191 227 230 220 197 234 221 219 225 232 217 216 226 228 229 229 251 245 233 249 245 269 255 249 284 228 257 268 258 265 295 281 246 247 294 225 285 269 248 275 267 273 268 272 275 255 233 256 248 275 274 272 277 266 273 277 287 331 274 305 344 345 350 383 440 444 471 475 499 587 604 710 872 1197 1615 2178 2897 3170 2592 1754 1254 1097 1155 1214 1427 1675 1478 1212 840 597 436 399 372 322 322 284 267 246 250 233 256 248 242 235 247 248 246 250 235 253 231 253 246 227 234 223 232 226 230 229 227 234 268 251 263 232 255 239 261 250 253 261 264 248 265 234 270 259 261 251 250 253 275 284 279 262 280 267 277 287 283 269 313 297 293 303 330 323 321 334 388 483 518 697 826 1112 1281 1146 898 682 533 511 571 614 712 800 717 507 432 348 339 278 275 231 260 269 250 255 250 243 220 234 211 209 219 230 221 209 225 199 208 190 241 220 188 227 238 218 209 202 189 231 183 206 209 185 211 215 206 218 191 234 220 197 209 184 199 185 207 205 208 210 196 194 217 180 190 216 224 203 213 241 190 188 201 222 227 185 206 192 219 201 188 197 213 186 189 170 179 197 206 211 190 207 190 180 168 225 197 235 186 186 198 208 175 173 227 171 196 171 198 183 198 197 201 217 210 183 197 204 219 209 229 193 200 218 206 235 214 209 223 226 204 244 202 229 249 219 202 237 189 222 220 206 211 194 231 204 203 219 224 192 216 200 218 187 187 226 202 197 227 188 194 185 211 210 200 209 189 227 201 185 202 211 199 194 183 206 204 189 228 216 199 189 205 210 187 230 190 199 162 216 192 215 172 190 197 192 199 201 205 194 182 195 187 231 194 187 195 212 186 177 193 199 209 218 225 218 236 183 196 224 207 214 191 169 185 182 201 208 212 186 199 205 230 194 223 214 191 194 203 212 189 197 173 181 187 192 189 204 208 211 225 179 211 222 226 175 211 214 197 217 207 226 214 190 233 200 216 214 214 204 215 191 207 220 215 217 199 195 213 210 241 202 222 205 233 220 247 242 213 242 242 215 240 227 233 219 236 238 224 225 245 227 218 241 275 249 248 257 225 287 289 279 256 251 281 301 269 280 301 306 309 370 363 368 355 376 399 401 405 429 389 465 503 578 652 760 871 1062 1385 1845 2665 3926 5101 5396 4225 2983 2004 1517 1263 1284 1528 1972 2548 2846 2506 1870 1188 851 621 514 438 408 331 323 308 292 258 225 278 213 198 221 231 249 234 221 225 238 260 244 207 205 230 229 213 179 256 215 209 252 226 209 207 206 245 237 253 203 236 217 252 194 202 223 201 203 207 234 226 221 220 209 214 251 248 203 237 215 211 217 200 191 218 232 200 222 229 204 227 218 265 232 184 222 250 217 229 196 220 190 198 214 213 179 225 194 175 173 173 188 194 213 195 207 175 205 257 199 230 226 207 203 218 179 208 205 180 214 195 201 201 203 176 202 212 188 196 213 194 191 176 214 190 209 188 195 191 189 181 203 182 208 171 197 213 210 210 219 181 195 194 243 188 191 179 185 195 188 197 207 179 204 194 204 217 218 215 192 212 223 175 184 216 193 217 204 234 210 199 227 213 219 223 218 213 196 195 194 203 201 216 194 243 181 214 204 202 196 209 218 194 234 187 218 220 203 229 229 207 207 211 222 226 249 219 216 182 246 218 235 231 252 241 282 253 253 247 227 253 253 243 276 250 285 270 274 276 260 263 312 286 296 315 353 390 401 453 499 561 710 967 1358 1624 1590 1227 884 683 606 472 498 529 545 726 868 956 822 629 510 408 349 291 270 263 256 225 200 232 204 234 218 212 231 218 191 216 200 230 214 219 201 234 193 208 206 210 206 196 217 209 199 186 209 167 223 217 217 193 212 197 212 214 205 174 225 230 223 201 176 216 207 201 205 194 199 192 201 237 176 218 192 203 211 220 212 162 171 215 195 184 178 199 185 175 191 198 211 197 172 205 223 190 182 175 202 192 195 208 184 175 207 209 186 210 169 199 203 198 208 209 175 195 196 188 177 222 206 164 172 195 206 197 204 193 227 207 183 189 202 170 183 184 199 194 187 202 192 198 197 204 190 207 183 211 135 187 216 209 187 186 184 185 161 175 198 178 192 212 191 199 223 198 188 169 181 227 191 187 204 192 191 194 209 204 186 195 202 183 198 205 222 235 211 192 202 190 215 206 184 173 194 192 183 189 210 204 199 185 202 203 223 218 182 214 214 191 206 188 217 225 198 225 232 195 203 178 218 212 184 198 214 215 208 186 195 194 224 181 213 220 223 206 217 208 191 177 209 236 186 199 209 170 200 188 190 209 196 203 199 204 201 177 175 203 198 187 213 186 218 210 177 177 215 229 203 211 225 213 191 209 218 209 183 228 187 217 204 225 227 244 216 197 186 238 213 244 221 257 230 214 232 232 217 239 248 263 263 234 201 205 224 192 231 224 220 228 232 190 198 187 179 205 200 214 211 178 228 196 189 184 191 188 206 184 181 170 212 187 219 206 205 172 184 198 195 201 167 175 186 183 195 195 218 188 194 187 187 225 198 196 203 189 205 202 196 207 216 207 189 209 203 203 219 208 205 181 198 180 199 209 227 197 184 203 217 193 225 228 193 212 211 193 180 234 193 211 193 211 210 218 214 203 255 223 223 219 190 223 205 209 205 220 220 278 224 207 209 192 216 189 194 236 207 190 230 194 169 209 214 193 204 205 220 194 216 201 212 204 234 168 209 199 238 225 204 185 225 220 243 177 171 194 199 227 166 209 223 207 185 198 210 214 216 184 219 199 203 182 171 201 200 202 198 236 200 208 210 205 234 175 198 217 190 209 230 210 227 230 190 232 198 219 218 176 197 224 219 216 221 219 207 197 215 207 205 209 218 213 228 229 219 213 218 202 214 201 203 224 204 195 188 239 233 189 205 227 200 212 188 218 214 198 202 238 232 192 214 217 239 218 196 218 211 217 210 221 209 210 216 214 192 203 215 204 255 215 227 221 269 248 205 232 198 229 211 236 224 257 223 195 206 223 205 216 233 234 213 215 220 232 194 229 247 200 214 222 196 210 207 213 227 217 227 231 234 195 195 201 235 199 202 199 214 236 166 222 195 191 211 199 205 186 215 214 206 217 237 258 228 200 208 222 221 228 201 206 192 198 216 209 199 204 236 237 223 207 219 236 211 219 209 213 209 234 218 219 204 235 222 219 190 210 227 221 218 249 222 227 215 241 212 248 255 244 223 234 224 204 266 227 249 200 230 253 235 219 249 233 228 234 253 261 243 236 212 227 262 260 256 255 247 262 251 280 274 310 267 258 245 274 313 303 334 299 348 379 371 412 427 468 524 565 760 930 1027 1319 1581 1827 1934 1872 1660 1320 1055 801 775 633 614 605 543 606 681 811 875 1048 1054 1114 927 861 700 604 504 387 355 357 316 292 277 289 290 275 262 218 280 231 248 239 256 242 244 226 229 256 228 249 248 205 236 229 231 221 213 222 212 223 214 233 231 210 205 194 212 225 200 233 216 191 234 247 219 223 241 223 217 186 213 184 226 192 254 234 221 222 231 195 255 272 243 250 242 294 315 351 360 368 377 399 287 297 293 273 240 259 243 238 250 297 267 249 319 279 276 269 272 263 255 227 205 224 247 194 236 213 214 223 258 233 203 220 232 226 200 203 208 240 185 208 185 211 176 215 191 214 190 214 201 158 201 204 208 186 215 220 201 193 190 219 210 202 193 234 208 212 200 208 205 189 205 199 226 195 237 190 190 195 208 214 224 209 206 235 177 196 202 177 188 210 194 233 228 211 226 222 205 189 194 236 195 207 232 209 215 202 206 219 215 233 200 227 203 208 195 230 216 223 211 200 230 187 211 224 222 202 203 241 202 164 189 207 192 226 194 207 194 195 216 185 210 191 217 216 223 232 185 189 213 204 192 216 227 198 185 188 205 201 192 223 207 205 204 234 190 224 203 200 214 236 193 207 179 201 191 236 189 249 207 177 207 200 231 195 192 213 199 196 217 229 240 248 193 208 213 205 210 205 205 193 198 198 213 197 230 206 243 220 214 209 228 208 216 191 226 208 209 226 206 210 184 213 212 197 251 222 204 198 200 180 221 216 186 187 206 215 214 227 197 185 222 185 202 224 233 192 207 220 213 221 209 176 219 201 192 219 207 210 228 250 232 193 213 208 243 212 213 212 216 201 204 210 223 204 198 204 214 211 196 203 225 227 191 198 204 243 213 211 250 211 202 221 254 225 213 199 218 225 219 251 209 206 218 210 209 197 204 204 197 195 203 195 208 237 206 239 227 235 234 217 208 196 206 191 214 208 177 248 243 235 242 219 221 234 230 209 219 181 225 213 231 192 182 223 222 215 240 219 244 224 241 227 194 225 231 230 231 234 202 228 250 216 239 243 256 253 236 259 214 241 202 208 247 287 256 235 254 244 255 222 222 251 258 255 246 296 257 278 324 297 308 317 367 425 507 566 649 772 874 1056 903 753 696 564 480 431 402 354 323 350 337 328 309 291 331 322 397 443 479 564 530 574 489 443 416 357 322 278 285 259 273 240 271 240 225 232 214 235 255 210 214 243 216 222 221 258 261 216 228 225 221 197 185 249 227 217 231 222 203 232 230 229 210 215 229 211 227 232 217 229 243 245 259 225 234 250 236 207 229 220 239 255 251 224 227 215 227 237 239 203 206 229 233 234 207 218 234 225 249 200 213 207 209 200 209 210 242 196 237 220 215 233 222 219 236 215 190 227 238 220 222 212 215 215 232 231 218 217 215 221 193 259 230 228 229 219 230 241 214 209 210 222 203 217 218 228 238 187 204 205 232 223 200 202 229 223 235 238 229 234 232 208 233 215 226 228 205 220 229 196 228 214 209 200 201 232 225 239 228 225 215 248 217 246 261 216 224 204 210 229 228 232 233 225 240 247 239 248 227 236 241 241 236 222 232 233 242 215 210 205 204 223 214 213 226 236 236 234 234 244 244 230 212 205 230 226 251 214 200 250 214 237 237 241 257 217 228 240 234 224 215 222 236 218 241 236 259 220 233 228 223 223 216 247 230 219 235 249 261 218 229 241 224 223 242 213 230 252 260 243 241 240 234 243 234 249 226 223 218 248 223 228 244 245 269 239 240 264 253 235 233 245 261 266 304 227 231 246 254 231 273 255 270 227 264 244 256 252 269 244 273 257 273 272 258 256 256 284 256 273 281 275 306 289 299 300 327 324 293 346 379 384 450 438 458 537 531 555 595 669 625 551 577 519 493 440 377 377 365 371 346 323 333 304 289 312 345 293 378 326 352 373 371 346 407 372 387 428 362 400 360 306 320 320 277 276 226 312 271 249 266 253 281 281 226 231 232 260 260 265 250 212 227 247 222 262 239 259 239 260 271 237 238 227 259 263 261 259 247 261 274 241 226 241 254 229 255 256 262 264 256 264 261 284 282 248 278 234 265 244 281 251 264 314 269 276 273 296 297 319 327 286 340 312 324 340 365 380 402 395 439 432 492 522 576 601 628 685 705 727 764 648 677 573 620 586 524 505 511 419 395 380 391 387 348 332 363 364 408 386 384 401 428 423 473 428 459 461 476 477 438 417 423 432 397 355 347 345 341 323 320 314 303 321 262 277 266 244 275 245 233 273 238 224 252 253 186 221 253 239 246 254 256 231 273 247 246 227 230 210 246 267 236 234 243 235 257 239 255 237 246 257 260 235 238 228 229 255 251 226 245 230 265 238 241 238 260 247 226 228 223 253 220 285 237 241 241 231 217 233 254 231 229 230 240 252 256 242 252 200 229 220 256 239 227 206 239 218 221 259 236 240 217 223 230 228 259 243 229 238 242 261 221 223 244 222 270 268 243 228 262 272 229 227 249 217 244 220 247 251 251 238 240 224 205 202 253 248 214 243 233 259 233 261 250 219 240 285 253 239 238 270 232 276 230 243 237 248 226 244 272 269 235 211 260 243 249 263 258 223 220 242 259 232 235 253 239 252 252 248 232 245 267 237 252 243 243 257 280 247 232 226 241 246 220 257 220 242 225 225 254 277 252 219 232 223 221 214 248 255 251 244 270 231 275 257 258 247 252 244 260 244 235 242 259 242 259 261 258 239 229 221 238 244 240 240 260 273 251 252 253 236 277 255 226 238 251 266 239 239 253 231 234 226 246 241 235 234 231 268 229 229 217 231 231 218 232 218 228 260 248 225 237 247 223 223 265 237 255 195 215 232 225 237 243 222 253 235 233 216 239 221 242 235 261 241 217 237 230 250 239 223 242 230 236 241 242 246 231 250 225 234 246 235 246 239 229 255 241 261 228 249 229 253 263 242 235 254 242 212 213 226 225 239 223 240 241 250 245 225 235 234 250 241 226 217 219 221 255 250 206 213 242 230 245 221 244 234 265 188 240 248 250 241 215 241 235 240 246 246 211 252 235 238 228 246 255 233 246 232 222 213 262 208 220 206 252 229 246 207 239 232 251 256 233 247 231 256 238 231 255 256 242 241 236 220 228 239 232 260 258 228 253 251 227 262 236 211 241 251 201 228 241 201 233 239 242 259 275 246</intensities>
			</dataPoints>
		</scan>
	</xrdMeasurement>
</xrdMeasurements>
