# Supplementary material for: Properties of a Prototype Corium of Nuclear Reactor
Source: Hindawi journal article supplement (doi:10.1155/2018/5208510), 2018-09-02
Supplement: f1 [file 5208510.f1.zip › 5208510.f1/Tac_2_kA1.ASC]

10.01813028 720.666666666667 37.9648960664103
10.04413028 638.160191048465 35.7256264059418
10.07013028 701.370153769293 37.4531748659388
10.09613028 702.666666666667 37.4877757853588
10.12213028 732.75640599644 38.2820168224309
10.14813028 682.679018997025 36.9507515213703
10.17413028 669.341382562169 36.5880139543586
10.20013028 702.166248936107 37.4744245836039
10.22613028 685.026737933924 37.0142334226693
10.25213028 710.654314336258 37.7002470638127
10.27813028 653.882046437182 36.1630210695175
10.30413028 662.180913026709 36.3917823973135
10.33013028 681.031361454359 36.9061339469297
10.35613028 702.495557654998 37.4832111125767
10.38213028 664.57517255073 36.4575142474286
10.40813028 653.460450073193 36.1513609722564
10.43413028 702.019608030039 37.4705112863446
10.46013028 660.899857749143 36.3565635820863
10.48613028 650.119067510979 36.0588149420077
10.51213028 661.360670173253 36.3692361804109
10.53813028 667.740586025718 36.5442358252493
10.56413028 647.556483845689 35.9876779980506
10.59013028 665.451286896152 36.4815374373436
10.61613028 671.485475152872 36.6465680563098
10.64213028 642.38246416774 35.8436176792394
10.66813028 665.416221246308 36.4805762357534
10.69413028 656.707469785108 36.2410670313419
10.72013028 686.116839614659 37.043672593701
10.74613028 684.889817179022 37.0105340998755
10.77213028 672.685633858749 36.6793029884361
10.79813028 700.434352977223 37.428180639118
10.82413028 704.101214267056 37.5260233509243
10.85013028 679.525400878322 36.8653062072817
10.87613028 640.407168828419 35.7884665451991
10.90213028 625.558238631849 35.3711249080899
10.92813028 648.396098174105 36.0110010461832
10.95413028 646.096590746531 35.9470886372327
10.98013028 623.232912595437 35.3053229016656
11.00613028 650.797933816848 36.0776366691846
11.03213028 651.823626629851 36.106055631427
11.05813028 645.501894029637 35.9305411601227
11.08413028 631.018047867042 35.5251473710396
11.11013028 617.611157525618 35.145729684433
11.13613028 649.440452796829 36.0399903661704
11.16213028 636.898896492143 35.6903039071438
11.18813028 635.603512579658 35.6539903118756
11.21413028 643.925161315907 35.8866315308614
11.24013028 635.868580158616 35.6614239805035
11.26613028 648.093805876175 36.0026056244871
11.29213028 647.075590281292 35.9743127879128
11.31813028 630.27375764584 35.504190108939
11.34413028 619.702888196632 35.2051953040068
11.37013028 640.223318240198 35.7833290301559
11.39613028 640.363092692693 35.7872349502639
11.42213028 636.804869097569 35.6876692737861
11.44813028 652.249846514319 36.117858367138
11.47413028 635.259692461321 35.6443457637062
11.50013028 626.584656146731 35.4001315293243
11.52613028 617.25164323244 35.1354989499919
11.55213028 615.056943508209 35.0729794431043
11.57813028 620.062165934688 35.2153990729819
11.60413028 620.105196949536 35.21662098923
11.63013028 614.670176238988 35.0619502092792
11.65613028 612.087023286612 34.9881986757424
11.68213028 597.542781012047 34.570009575123
11.70813028 609.956564702273 34.9272548220519
11.73413028 599.69332073667 34.6321619520546
11.76013028 592.052445783568 34.4108252090405
11.78613028 605.028408856164 34.7858709494577
11.81213028 595.43574541247 34.5090059379423
11.83813028 596.538352114685 34.5409424340068
11.86413028 598.911263859186 34.6095727757274
11.89013028 618.954211010072 35.1839227776004
11.91613028 613.329671069853 35.0236968656895
11.94213028 616.526152475482 35.1148445098503
11.96813028 588.031082967365 34.2937627847212
11.99413028 599.705047265713 34.6325005526807
12.02013028 618.613663908936 35.1742423915267
12.04613028 600.319184284851 34.6502289829332
12.07213028 592.593666632655 34.4265498309853
12.09813028 593.751336261078 34.4601606572308
12.12413028 565.795023150529 33.6391148263604
12.15013028 579.593861255775 34.0468459994689
12.17613028 573.058698294369 33.8543556516549
12.20213028 582.107676437578 34.1206001247803
12.22813028 603.50189402968 34.7419600491878
12.25413028 607.413268648066 34.8543618116317
12.28013028 595.885540972817 34.5220376273712
12.30613028 549.824755614656 33.1609636655709
12.33213028 586.502492935721 34.2491603673936
12.35813028 593.764092874361 34.4605308396247
12.38413028 580.796095166728 34.0821388755673
12.41013028 584.672571863148 34.1956889640536
12.43613028 608.959780750873 34.8987042954569
12.46213028 565.294841975049 33.6242425037368
12.48813028 573.043629920846 33.8539105546419
12.51413028 557.206773567553 33.3828331202597
12.54013028 555.542544457008 33.3329429980915
12.56613028 577.429283241869 33.9832100673809
12.59213028 557.805147584609 33.4007529132087
12.61813028 584.036263461926 34.177076044095
12.64413028 588.656626096545 34.3119986621749
12.67013028 560.346116841856 33.4767416826027
12.69613028 591.296123651088 34.3888389932282
12.72213028 573.283756284044 33.8610028287422
12.74813028 547.115752561776 33.0791702605061
12.77413028 582.03300548133 34.1184116125394
12.80013028 515.815798919366 32.1190223674185
12.82613028 556.515096857846 33.3621071534112
12.85213028 537.956717393395 32.8011194136235
12.87813028 544.479779616237 32.9993872554094
12.90413028 515.978232900835 32.1240792210714
12.93013028 507.334447281459 31.8538678116633
12.95613028 554.120837333823 33.2902639621203
12.98213028 535.759385489959 32.7340613273073
13.00813028 561.203836005996 33.5023532309596
13.03413028 564.867981252581 33.6115450776242
13.06013028 535.018757532281 32.7114278970601
13.08613028 538.730587387558 32.8247037271491
13.11213028 539.028172301048 32.8337683582329
13.13813028 541.903966227505 32.921238318979
13.16413028 545.331341992093 33.0251825730636
13.19013028 558.105364677379 33.409740037222
13.21613028 563.931860041511 33.5836823484713
13.24213028 547.734680829236 33.0978754855727
13.26813028 556.847983976297 33.3720836621359
13.29413028 544.338067612975 32.9950925930804
13.32013028 550.011322246122 33.1665892803623
13.34613028 563.24598962772 33.5632534068949
13.37213028 541.705825758191 32.9152191473243
13.39813028 550.936052383794 33.1944589467518
13.42413028 550.264510604921 33.1742222397126
13.45013028 538.843749702054 32.8281510201855
13.47613028 544.858024546382 33.0108474458437
13.50213028 521.175995982505 32.2854764865723
13.52813028 520.102816362058 32.2522190356589
13.55413028 552.255682883526 33.2341897113056
13.58013028 539.092871514453 32.8357388074169
13.60613028 560.161487761148 33.4712260833435
13.63213028 577.608525346377 33.9884840893611
13.65813028 560.672236407427 33.486481941447
13.68413028 521.285496033521 32.2888679279259
13.71013028 556.102526016425 33.3497384102612
13.73613028 549.83547577665 33.1612869405471
13.76213028 549.225046131079 33.1428739288276
13.78813028 544.229109499393 32.9917901757208
13.81413028 542.215993713237 32.9307149546814
13.84013028 544.950617573794 33.0136522539932
13.86613028 517.033978596964 32.1569270483659
13.89213028 506.491574972519 31.8273962168607
13.91813028 510.34110407514 31.9481174429775
13.94413028 510.666666666667 31.9583061712184
13.97013028 515.584781942654 32.1118290336335
13.99613028 528.055634936894 32.4978656202802
14.02213028 526.560661151289 32.4518308004738
14.04813028 526.164982296788 32.4396357037741
14.07413028 528.957552854552 32.5256069229938
14.10013028 527.433601380035 32.4787192290593
14.12613028 519.160370634901 32.2229846735184
14.15213028 503.929479454071 31.7467944666567
14.17813028 532.256239857607 32.6268674517676
14.20413028 548.25160130048 33.1134897375822
14.23013028 525.560688046566 32.4210020834201
14.25613028 512.582206732057 32.0181887911249
14.28213028 527.902516823627 32.4931536426868
14.30813028 501.410232185905 31.6673406583472
14.33413028 492.43092726887 31.3825087355638
14.36013028 514.195676017881 32.0685414703532
14.38613028 535.561496612408 32.7280154183662
14.41213028 510.777669912081 31.9617793594813
14.43813028 501.612690793347 31.6737333067432
14.46413028 527.978080209676 32.4954790766247
14.49013028 523.137756216022 32.3461823471031
14.51613028 510.951006820069 31.9672021553363
14.54213028 481.150985939432 31.0209924386513
14.56813028 493.143676449185 31.4052121931753
14.59413028 526.477940966156 32.449281685922
14.62013028 512.574837095014 32.0179586199687
14.64613028 492.063058364493 31.3707844455472
14.67213028 516.487020279276 32.1399135119955
14.69813028 506.850379600458 31.8386676731442
14.72413028 525.34688347574 32.4144067808047
14.75013028 523.340573996373 32.3524519626063
14.77613028 503.87718636162 31.7451472310846
14.80213028 506.005905196447 31.812133068892
14.82813028 512.968303089912 32.0302451782659
14.85413028 484.514845266083 31.1292417275488
14.88013028 487.333333333333 31.2196519305816
14.90613028 491.281863843374 31.3458725781681
14.93213028 513.258563476479 32.0393059686529
14.95813028 493.464852075278 31.4154373541187
14.98413028 521.908490847349 32.3081565814996
15.01013028 494.248663738921 31.4403773431211
15.03613028 508.313362952289 31.8845844555732
15.06213028 498.834838116741 31.5859094571216
15.08813028 515.378744935618 32.1054121585635
15.11413028 487.443794641351 31.2231899280439
15.14013028 489.937444819031 31.3029533692599
15.16613028 502.973345929962 31.716662684777
15.19213028 511.197526526591 31.9749128701422
15.21813028 505.709892304592 31.8028266764007
15.24413028 487.157265345471 31.2140117686103
15.27013028 456.134830513027 30.2038020955319
15.29613028 513.83211021502 32.0572023175766
15.32213028 501.655302488583 31.6750786104339
15.34813028 514.856353624179 32.0891369040733
15.37413028 474.543670263728 30.807261165632
15.40013028 448.699168964509 29.9566075837872
15.42613028 474.17001010019 30.795129813014
15.45213028 471.677542697876 30.7140861071228
15.47813028 459.115752561778 30.3023349780764
15.50413028 451.957358231433 30.0651744791688
15.53013028 467.469864841966 30.5767841619084
15.55613028 456.921609811626 30.2298398874895
15.58213028 474.619179859222 30.8097121005446
15.60813028 488.311623202812 31.2509719273757
15.63413028 457.442177509635 30.2470553115385
15.66013028 492.649400470188 31.3894695867958
15.68613028 482.70323551091 31.0709908278095
15.71213028 474.922571068595 30.8195577862044
15.73813028 474 30.7896086366813
15.76413028 504.672586899833 31.7701931659168
15.79013028 475.326451843165 30.8326596920592
15.81613028 478.072374232662 30.9215903288515
15.84213028 467.858287996775 30.5894847291279
15.86813028 462.465031661714 30.4126628778775
15.89413028 469.575618765582 30.6455745178837
15.92013028 463.028324992243 30.4311789121698
15.94613028 459.016376944802 30.2990553299869
15.97213028 433.921636706875 29.4591797817548
15.99813028 457.210229349319 30.2393858849454
16.02413028 455.369024784498 30.178436831105
16.05013028 466.55136031977 30.5467301137051
16.07613028 473.541262781007 30.7747059378642
16.10213028 462.030274401521 30.3983642455156
16.12813028 450.875069224437 30.0291548074346
16.15413028 426.055368308485 29.1909358640138
16.18013028 445.358388486424 29.8448785719233
16.20613028 449.655775598742 29.9885236581844
16.23213028 430.095225206652 29.3290035700721
16.25813028 454.836455248463 30.1607843150162
16.28413028 462.086298584628 30.4002071895778
16.31013028 444.419116875906 29.8133901754197
16.33613028 453.310955469532 30.1101629178433
16.36213028 467.473763660556 30.5769116707543
16.38813028 458.619233649777 30.2859450455084
16.41413028 457.454880332394 30.24747527753
16.44013028 466.99462488232 30.561237700143
16.46613028 459.214571204611 30.3055958926602
16.49213028 448.588402274174 29.9529097843323
16.51813028 423.093413451853 29.0892905878385
16.54413028 428.85925243186 29.2868315948264
16.57013028 445.009190072317 29.8331758306861
16.59613028 438.570159784013 29.6165548227343
16.62213028 428.941202805024 29.2896296598309
16.64813028 430.559897695437 29.3448427392425
16.67413028 449.693404600591 29.9897784120053
16.70013028 457.132827313223 30.2368261334824
16.72613028 451.705017192348 30.056780173277
16.75213028 449.011463078687 29.9670306529922
16.77813028 452.177693800021 30.0725021838896
16.80413028 438.701594662037 29.6209923757472
16.83013028 461.338124581593 30.375586400318
16.85613028 468.292167863887 30.6036653969385
16.88213028 457.534312463604 30.2501012382968
16.90813028 447.607899545058 29.920157069944
16.93413028 455.519106435603 30.1834095633877
16.96013028 449.756196336639 29.9918721101781
16.98613028 436.576759609051 29.5491712103419
17.01213028 425.79883810515 29.1821465319174
17.03813028 420.641962005943 29.0048948284921
17.06413028 424.281097209526 29.1300908755715
17.09013028 431.140151840183 29.3646097144227
17.11613028 436.692332584392 29.5530821602212
17.14213028 442.625390438022 29.753164216198
17.16813028 441.011334104715 29.6988664465402
17.19413028 419.886753821526 28.9788458645794
17.22013028 423.165650030066 29.091773752388
17.24613028 422.827735108212 29.0801559524089
17.27213028 424.105601232457 29.1240656925663
17.29813028 432.875892827024 29.4236603034709
17.32413028 443.792429725199 29.7923624348657
17.35013028 406.160122221171 28.5012323319947
17.37613028 416.053392003928 28.8462611790134
17.40213028 409.574253225692 28.6207705425864
17.42813028 402.715671705194 28.3801223290244
17.45413028 390.954043282231 27.962619451054
17.48013028 381.306568504131 27.6154510556728
17.50613028 401.030750689773 28.3206903408011
17.53213028 428.772489417463 29.2838689184835
17.55813028 412.408450504466 28.7196257115049
17.58413028 415.633634290022 28.83170596028
17.61013028 417.110015093136 28.8828674162776
17.63613028 409.642560911983 28.6231570904393
17.66213028 410.236517890273 28.6439004987195
17.68813028 384.694575517395 27.7378649328817
17.71413028 403.848040944883 28.4199944034084
17.74013028 429.316327409127 29.3024342814425
17.76613028 394.05261351145 28.0732119114094
17.79213028 410.088625381614 28.6387368918957
17.81813028 412.32475402565 28.7167113028512
17.84413028 397.8839539145 28.2093585150212
17.87013028 389.46741542728 27.9094039860145
17.89613028 427.750420114126 29.2489459678166
17.92213028 413.573528523713 28.7601644127329
17.94813028 410.087664124614 28.638703326953
17.97413028 418.352746740298 28.9258620179347
18.00013028 420.574379021572 29.0025646804407
18.02613028 393.607228633691 28.0573423058454
18.05213028 396.358720764018 28.1552382608998
18.07813028 370.176106741701 27.2094140599058
18.10413028 402.738346270753 28.3809212771803
18.13013028 405.397170190303 28.4744506598566
18.15613028 403.544688489407 28.409318488461
18.18213028 401.56453307457 28.3395318618558
18.20813028 366.937205085863 27.0901164665589
18.23413028 387.936666326555 27.8545029152041
18.26013028 404.534621024008 28.4441424909948
18.28613028 399.3458383548 28.2611336770059
18.31213028 388.539061779965 27.8761210278606
18.33813028 389.966132162235 27.9272673980909
18.36413028 383.060521907769 27.67889166523
18.39013028 417.290973229892 28.8891319783026
18.41613028 411.158142738583 28.6760577045933
18.44213028 384.824920164393 27.7425636942368
18.46813028 385.385542561863 27.7627643638692
18.49413028 380.700450640511 27.59349382157
18.52013028 379.170273550547 27.5379837152449
18.54613028 381.321301421972 27.6159845532247
18.57213028 376.605851235175 27.4447026303866
18.59813028 383.374388043583 27.6902288919244
18.62413028 391.915288473575 27.9969744248758
18.65013028 365.297512908203 27.0295213760141
18.67613028 381.168396146592 27.6104471585156
18.70213028 380.071550630169 27.570692796162
18.72813028 379.858943871459 27.5629803857079
18.75413028 366.680034044585 27.0806216340979
18.78013028 376.164997333471 27.4286345753292
18.80613028 354.743451581904 26.6361953582678
18.83213028 349.454170667154 26.4368746514089
18.85813028 363.934659948631 26.9790533543574
18.88413028 375.653646603026 27.40998528285
18.91013028 364.633409593535 27.0049406440205
18.93613028 357.05328124473 26.7227723578498
18.96213028 374.7039902862 27.3753169949208
18.98813028 361.004940761342 26.870241560557
19.01413028 345.690062756111 26.2941081900912
19.04013028 344.658213154864 26.2548362461039
19.06613028 361.328823750139 26.8822924524728
19.09213028 376.617173481298 27.4451151748831
19.11813028 358.778211849478 26.7872436749091
19.14413028 352.299438600292 26.5442814406528
19.17013028 365.401961438576 27.0333853388205
19.19613028 373.316204791331 27.3245751949168
19.22213028 363.666441970183 26.9691098099356
19.24813028 341.403449596342 26.1305740310596
19.27413028 342.912156288949 26.1882476041811
19.30013028 353.197206107591 26.5780814246473
19.32613028 376.043091161482 27.4241897295611
19.35213028 391.569042657769 27.9846044337871
19.37813028 365.341687944532 27.0311556521186
19.40413028 359.841647601616 26.8269136354377
19.43013028 357.075338689529 26.723597762634
19.45613028 348 26.3818119165458
19.48213028 344.634858997379 26.253946712728
19.50813028 346.64835534922 26.3305281127903
19.53413028 359.649175773704 26.8197380961748
19.56013028 357.748147107758 26.7487624800759
19.58613028 350.636140673381 26.4815460528037
19.61213028 348.204419875352 26.3895592943631
19.63813028 345.56166434025 26.2892245735872
19.66413028 349.98049087052 26.456775724586
19.69013028 364.834281142646 27.0123779457731
19.71613028 360.906595228661 26.8665812945623
19.74213028 348.750003972606 26.4102254429077
19.76813028 381.269954549841 27.6141251735354
19.79413028 359.436272313186 26.8117986085673
19.82013028 344.741688115282 26.2580154663403
19.84613028 357.017544683515 26.7214350169864
19.87213028 345.099142239937 26.2716250825843
19.89813028 370.633577321379 27.226221820935
19.92413028 358.454907227672 26.7751716045919
19.95013028 351.279438145881 26.5058272138743
19.97613028 339.196191060035 26.0459667150227
20.00213028 347.443848431906 26.3607226164954
20.02813028 323.202203837626 25.4244844131646
20.05413028 306.433185238512 24.7561380363946
20.08013028 336.989237906043 25.9610954278144
20.10613028 356.556534458159 26.7041769938023
20.13213028 306.718684450163 24.7676678131052
20.15813028 348.003952609115 26.3819617393823
20.18413028 322.617425073061 25.4014733853397
20.21013028 329.790773839643 25.6823197487938
20.23613028 317.093976782057 25.1830886422637
20.26213028 360.310631872447 26.8443898001965
20.28813028 337.903981264186 25.9963067093842
20.31413028 351.575367173851 26.5169895415694
20.34013028 344.7830030978 26.2595888428513
20.36613028 326.441372121913 25.551570289198
20.39213028 335.240740305875 25.8936571501932
20.41813028 348.770276557884 26.4109930353966
20.44413028 350.956073377344 26.4936246435758
20.47013028 303.13867871915 24.6227000436244
20.49613028 344.632448336536 26.2538548916739
20.52213028 318.890427943657 25.2543235088037
20.54813028 318.666666666667 25.2454616383487
20.57413028 329.677557734591 25.6779110417725
20.60013028 288.329500163883 24.0137252488606
20.62613028 332.348488748862 25.7817178926798
20.65213028 314.575310205209 25.0828750427541
20.67813028 336.940454385914 25.9592162588131
20.70413028 344.812918326451 26.2607280297577
20.73013028 328.917055118384 25.6482769447924
20.75613028 326.731937890797 25.5629394980623
20.78213028 298.117198787488 24.4179114089427
20.80813028 329.368444093227 25.6658701038257
20.83413028 306.085558846086 24.7420920233551
20.86013028 323.27263183913 25.4272543480074
20.88613028 320.983455327356 25.337065944081
20.91213028 305.957343194749 24.7369093944554
20.93813028 321.65134987947 25.3634126205237
20.96413028 309.975989967789 24.8988349112078
20.99013028 339.720229576522 26.0660787068758
21.01613028 313.077536512485 25.0230907968015
21.04213028 308.3670904119 24.8341333817752
21.06813028 303.591145212613 24.6410691818603
21.09413028 302.515402240163 24.5973739346363
21.12013028 327.088460831862 25.5768825634346
21.14613028 342.199254417428 26.1610112349438
21.17213028 313.942092056706 25.0576172872325
21.19813028 311.645360819065 24.9657910276869
21.22413028 297.785189062162 24.4043106463658
21.25013028 320.351830593348 25.3121247860921
21.27613028 320.272544797118 25.3089922674578
21.30213028 323.658033568429 25.4424068660349
21.32813028 317.760095155155 25.2095257851136
21.35413028 315.130347825141 25.1049934405545
21.38013028 333.262911688008 25.8171614120533
21.40613028 325.867115718133 25.5290859890492
21.43213028 325.062696013533 25.4975565893492
21.45813028 314.53553717096 25.0812893277423
21.48413028 309.329434514732 24.8728540587819
21.51013028 312.56202669121 25.0024809445467
21.53613028 321.795274742329 25.3690864929082
21.56213028 335.656362646187 25.9097033038276
21.58813028 368.295020562029 26.3936652536462
21.61413028 355.438478747617 26.4477751553275
21.64013028 348.400332448346 26.3969821172174
21.66613028 344.456326558104 26.2471456184517
21.69213028 306.819458004765 24.7717362332464
21.71813028 299.165611276195 24.4608099324693
21.74413028 315.716758758075 25.1283409224754
21.77013028 320.787656691648 25.3293370103384
21.79613028 313.889035508456 25.0554998157473
21.82213028 301.022030549522 24.5365861745077
21.84813028 299.960951667634 24.4933032344612
21.87413028 304.502897218642 24.6780427594508
21.90013028 296.517363508038 24.352304347147
21.92613028 292.141406620907 24.1719426865491
21.95213028 299.398436829622 24.4703263905336
21.97813028 306.953210999199 24.7771350643774
22.00413028 314.051301762083 25.0619752518465
22.03013028 297.787988969203 24.4044253761158
22.05613028 290.81195706945 24.1168802737605
22.08213028 296.48863741096 24.3511247136948
22.10813028 305.907559663746 24.7348967923356
22.13413028 306.990306744157 24.7786321956704
22.16013028 299.558070904008 24.4768490988529
22.18613028 292.007240663038 24.1663915661001
22.21213028 289.695410978475 24.0705384642087
22.23813028 302.275374777568 24.5876137425968
22.26413028 303.099860585728 24.6211234750053
22.29013028 280.099932591054 23.668541678399
22.31613028 284.589157049462 23.8574582489192
22.34213028 296.876000408133 24.3670269178713
22.36813028 287.842234649063 23.9934255432217
22.39413028 299.023671398357 24.4550064975807
22.42013028 281.072263473494 23.7095872369594
22.44613028 282.590432369288 23.7735328619576
22.47213028 266.562949194338 23.0895192325149
22.49813028 290.71167398603 24.1127217039483
22.52413028 277.090490926974 23.5410488690276
22.55013028 281.39346917291 23.7231308714895
22.57613028 305.371252680818 24.7132050807182
22.60213028 292.039826824804 24.167739936734
22.62813028 278.291290470806 23.5920024784166
22.65413028 277.377729888062 23.5532473297446
22.68013028 280.44287531631 23.6830266358129
22.70613028 280.17557984099 23.6717375720917
22.73213028 282.397349776702 23.765409728288
22.75813028 271.35845731366 23.2962854255205
22.78413028 285.965033250758 23.915059408279
22.81013028 295.865193204132 24.3255089650404
22.83613028 271.371923592183 23.2968634623712
22.86213028 283.650541313627 23.8180831014432
22.88813028 293.315411262172 24.2204628883171
22.91413028 298.743313927436 24.4435395934155
22.94013028 283.679770594228 23.8193102584532
22.96613028 280.429034828232 23.6824422232266
22.99213028 296.016442593955 24.331725898257
23.01813028 258.136309990266 22.7216333035399
23.04413028 278.115725666499 23.5845595959093
23.07013028 281.391708030615 23.7230566340265
23.09613028 250.3150101573 22.374763022535
23.12213028 284.637704014477 23.8594930379703
23.14813028 257.627378601173 22.6992237136503
23.17413028 295.200371543723 24.2981633686056
23.20013028 279.197107206987 23.6303663622461
23.22613028 270.990863718236 23.2805010134334
23.25213028 289.657728186112 24.0689728981571
23.27813028 280.643938310499 23.6915148654745
23.30413028 292.396113210748 24.1824776733381
23.33013028 267.579319782967 23.1334960515252
23.35613028 255.021542402681 22.5841334747508
23.38213028 279.798326241175 23.6557953255085
23.40813028 270.799742393565 23.2722900632303
23.43413028 276.960840908476 23.5355408226994
23.46013028 258.276039332758 22.7277820885698
23.48613028 298.345955470189 24.4272780092334
23.51213028 293.995597997917 24.2485297697785
23.53813028 270.149395703059 23.2443281556193
23.56413028 267.107314086658 23.1130834847563
23.59013028 280.462345691919 23.6838487451647
23.61613028 268.741795696392 23.1836923589144
23.64213028 271.205270373119 23.2897089021361
23.66813028 255.269145983998 22.5950944226395
23.69413028 256.393076748625 22.6447820368678
23.72013028 281.128554285109 23.7119612974173
23.74613028 262.12499642465 22.896506127558
23.77213028 268.521406337249 23.1741841857378
23.79813028 273.333333333333 23.3809038890002
23.82413028 254.320504714689 22.5530709534063
23.85013028 264.164608087231 22.985413117333
23.87613028 266.872437045258 23.1029191681596
23.90213028 256.915384196144 22.6678355471423
23.92813028 264.398508834948 22.9955869172738
23.95413028 264.788992158205 23.0125614462278
23.98013028 268.48831699196 23.1727562880189
24.00613028 260.303223481529 22.8168018565937
24.03213028 265.965994507759 23.0636508171521
24.05813028 263.868481258055 22.9725262545526
24.08413028 253.012936199719 22.4950188352764
24.11013028 260.116701960184 22.8086256473372
24.13613028 260.544715384684 22.8273833535376
24.16213028 263.090910246578 22.9386534149927
24.18813028 262.98942935104 22.9342289755309
24.21413028 262.717998502116 22.9223907349175
24.24013028 250.926523677742 22.4020768536197
24.26613028 251.543284195612 22.4295913558679
24.29213028 261.105322745417 22.8519287039592
24.31813028 261.638173946582 22.8752343789777
24.34413028 259.557277374848 22.7840855587776
24.37013028 257.999999999965 22.7156333831996
24.39613028 261.077833214294 22.850725730895
24.42213028 265.676833032669 23.0511098662372
24.44813028 263.38831239558 22.951614862383
24.47413028 249.669226840582 22.345882253363
24.50013028 245.012729718007 22.13651868375
24.52613028 254.113497770146 22.5438904260177
24.55213028 249.77602588512 22.3506611036506
24.57813028 254.859183604626 22.5769432654036
24.60413028 266.885415176938 23.1034809142232
24.63013028 257.638647056741 22.699720132933
24.65613028 254.230001929156 22.5490577155302
24.68213028 254.55119259193 22.5632973030065
24.70813028 249.192636377632 22.3245441779953
24.73413028 240.250502389002 21.9203331356529
24.76013028 248.24436063744 22.282026866398
24.78613028 256.85517084878 22.6651790572579
24.81213028 262.263465484 22.9025529356009
24.83813028 258.732426037639 22.7478537905288
24.86413028 256.647989820219 22.6560362738154
24.89013028 244.234068475524 22.1013152764954
24.91613028 242.704280631832 22.0319894985375
24.94213028 247.628483868824 22.2543696324486
24.96813028 249.623365845326 22.3438298348929
24.99413028 225.695189460118 21.2459497062437
25.02013028 240.549674360849 21.9339770384146
25.04613028 249.241006934369 22.3267107713773
25.07213028 261.513560411958 22.8697861997859
25.09813028 246.999056957769 22.2260683413765
25.12413028 272.771614401335 23.2795256278408
25.15013028 262.144131344576 22.8973418258354
25.17613028 245.014247949086 22.136587268551
25.20213028 254.630792450979 22.5668248741811
25.22813028 251.157615837868 22.4123901375051
25.25413028 255.945463974513 22.6250066950051
25.28013028 244.936609357911 22.1330797386135
25.30613028 249.554255949369 22.3407366015254
25.33213028 253.678213609273 22.5245738520964
25.35813028 285.753512374591 23.0044625766126
25.38413028 294.778633301976 23.3424883849387
25.41013028 266.908595509978 23.1901540005968
25.43613028 254.428813309802 22.5578728301142
25.46213028 275.058353765444 23.5429540446163
25.48813028 262.88423240154 22.9296416195954
25.51413028 256.997936653433 22.671477087011
25.54013028 239.842608858617 21.9017172321541
25.56613028 245.423935019505 22.1550867757048
25.59213028 238.539663864059 21.8421456759202
25.61813028 257.796343580443 22.7066661392835
25.64413028 240.220212950797 21.9189512956618
25.67013028 246.267798658846 22.1931430247654
25.69613028 255.527987947517 22.6065471909143
25.72213028 228.138705614428 21.3606510019909
25.74813028 247.940259762797 22.2683748739236
25.77413028 243.393576754061 22.0632534660717
25.80013028 234.213094905519 21.6431557267197
25.82613028 245.60695332474 22.1633460165535
25.85213028 251.74394290688 22.4385357323904
25.87813028 246.315590848609 22.1952963867847
25.90413028 254.749806171404 22.5720980935049
25.93013028 252.241476866437 22.460697979646
25.95613028 239.153114935179 21.8702133018944
25.98213028 257.969671807889 22.7142982197509
26.00813028 233.664824838498 21.617808623378
26.03413028 245.464462829039 22.1569159780435
26.06013028 240.309769516047 21.9230367201283
26.08613028 235.282558471964 21.6925129236778
26.11213028 257.549357119937 22.6957862661745
26.13813028 238.715237348905 21.850182486602
26.16413028 262.608543561113 22.9176152145512
26.19013028 241.493311543911 21.9769566384389
26.21613028 227.815882783288 21.3455326840671
26.24213028 236.779859054528 21.7614272994456
26.26813028 247.851382789419 22.2643833415354
26.29413028 237.381682497176 21.789065262061
26.32013028 230.365961427057 21.4646668470329
26.34613028 236.508802415092 21.7489679026427
26.37213028 241.196259887273 21.9634359737848
26.39813028 238.504873523199 21.84055281
26.42413028 227.479554919752 21.3297705060205
26.45013028 227.402518412706 21.3261585107448
26.47613028 226.269370680482 21.2729579833403
26.50213028 228.643243681945 21.38425793344
26.52813028 233.729835790327 21.6208157010936
26.55413028 237.631406393702 21.80052322279
26.58013028 235.495668414198 21.7023348243546
26.60613028 249.623471102107 22.3438345456686
26.63213028 240.622072310731 21.9372775116117
26.65813028 238.497327477843 21.8402073011152
26.68413028 230.909952109789 21.4899954448478
26.71013028 230.545622851129 21.4730353164675
26.73613028 235.653242320105 21.7095942993003
26.76213028 237.073362384972 21.7749104422944
26.78813028 252.536405883533 22.4738250364077
26.81413028 239.452172969741 21.883883246341
26.84013028 241.902187724158 21.9955535381203
26.86613028 248.48908044772 22.2930069953661
26.89213028 246.322304610933 22.1955988705389
26.91813028 249.400679762625 22.3338612766635
26.94413028 244.95451639239 22.1338887858591
26.97013028 247.388426332867 22.2435800325787
26.99613028 252.639009407702 22.4783900405568
27.02213028 253.702735505474 22.5256624988245
27.04813028 240.306382561487 21.9228822266365
27.07413028 232.206998264037 21.5502667391398
27.10013028 253.123541518388 22.4999351785016
27.12613028 263.916860495264 22.9746321187202
27.15213028 253.183877483545 22.502616624897
27.17813028 256.530027576892 22.6508290169209
27.20413028 265.700255567208 23.2304015637131
27.23013028 282.199147853541 23.2674228847075
27.25613028 322.874215620557 24.0771299491522
27.28213028 324.291010021189 24.3931236432129
27.30813028 296.351433770235 24.3276152527673
27.33413028 324.755640203772 25.441403347039
27.36013028 336.151537897336 25.4971086904325
27.38613028 319.016082261922 24.9831350840939
27.41213028 294.488778121141 24.9439149330808
27.43813028 308.953527994991 25.2692953344533
27.46413028 353.133127556519 25.7534384193369
27.49013028 386.819636384997 26.1773544154781
27.51613028 362.125296426597 26.1642491759984
27.54213028 364.92611290969 26.9804768803396
27.56813028 381.666772025052 27.5608962806385
27.59413028 422.999026298618 28.0188319955779
27.62013028 423.787316969934 28.1601704897691
27.64613028 447.524801934705 29.000386232231
27.67213028 436.592674034705 29.303919871475
27.69813028 493.132212632033 30.3817315868812
27.72413028 517.76934180656 30.9968673144528
27.75013028 543.952337811478 31.5651297216301
27.77613028 586.012374533007 32.9419381210563
27.80213028 704.955063855973 35.0581899656354
27.82813028 689.572245447204 35.2757218121329
27.85413028 721.428090912463 36.6104668574207
27.88013028 772.876245744842 38.3609106264677
27.90613028 814.973334204148 38.8816157508126
27.93213028 942.407858183006 40.9440913937129
27.95813028 1136.91575473383 43.8120383439992
27.98413028 1230.4537510058 45.5904049207309
28.01013028 1366.29496624826 48.5740916149418
28.03613028 1461.34411569426 51.1918806602383
28.06213028 1768.08314378703 55.0612782493279
28.08813028 2208.32822629811 59.968937053244
28.11413028 2915.9776365538 66.7395145218243
28.14013028 4385.64589205235 79.1436733113809
28.16613028 8581.84800640682 104.722399873788
28.19213028 16461.9998412724 140.51791513008
28.21813028 17374.1211255103 151.022594879385
28.24413028 9484.88743833229 141.467923347181
28.27013028 5806.42355274098 149.834713003415
28.29613028 2164.22656553069 132.524524618905
28.32213028 1047.86488124333 98.0696887862722
28.34813028 505.713447374287 73.6557503866297
28.37413028 660.895891168325 50.5489272634163
28.40013028 715.412444039177 40.4181921484431
28.42613028 702.855333552215 35.258161119849
28.45213028 542.437092970341 34.8432966140385
28.47813028 310.476565459831 31.9555626075038
28.50413028 313.971810996602 31.2909442093618
28.53013028 338.440581488822 28.7789073652084
28.55613028 356.23655140497 25.8196487534801
28.58213028 313.83541785124 25.1445779281138
28.60813028 316.539075545069 25.6490201569808
28.63413028 297.001432161821 25.3649709314177
28.66013028 253.645453935258 23.8162011579169
28.68613028 292.692559591152 24.5843447900603
28.71213028 313.009116117236 24.5041704699041
28.73813028 308.640646003409 23.8623025222585
28.76413028 283.810112438556 24.0775749832637
28.79013028 256.118755772483 22.6326647027027
28.81613028 249.079876232984 23.4977325822046
28.84213028 276.227522875828 23.4271773771182
28.86813028 293.29166581002 22.9135828636594
28.89413028 272.535447196187 22.9334561267359
28.92013028 269.504565760668 23.4113270242188
28.94613028 258.099818653768 22.7200272294629
28.97213028 246.177945391785 22.1890939604025
28.99813028 230.883408799015 21.4887602620074
29.02413028 236.126185556193 21.7313683672332
29.05013028 244.245878868521 22.1018496451551
29.07613028 250.36175722618 22.3768522016024
29.10213028 272.113509051735 22.5447501046735
29.12813028 250.605264187731 22.3877316487281
29.15413028 244.403743120064 22.108991072415
29.18013028 252.247244408445 22.4609547619172
29.20613028 239.743646205036 21.8971982776352
29.23213028 227.550494785286 21.333096108408
29.25813028 234.538382188091 21.6581800799648
29.28413028 253.580119668301 22.5202184566803
29.31013028 305.867080255975 23.0308694996508
29.33613028 319.553831188026 23.5367586586289
29.36213028 308.515754054568 24.0187014173752
29.38813028 292.775877499143 24.4878682332213
29.41413028 270.429558468833 24.2423649317266
29.44013028 253.574541819932 23.6485887588268
29.46613028 252.667316567363 23.2779709712595
29.49213028 254.79196855291 22.8568317397866
29.51813028 240.073664589202 21.9122643553423
29.54413028 223.613133830175 21.1477248814228
29.57013028 230.050804934703 21.4499792510251
29.59613028 228.448735402747 21.3751601352012
29.62213028 218.987605737678 20.9278573073154
29.64813028 222.057794006012 21.0740501093649
29.67413028 224.668337588906 21.197562953741
29.70013028 230.191777199356 21.4565503844097
29.72613028 239.540080005576 21.8878998538268
29.75213028 244.542586388968 22.1152701267232
29.77813028 241.46401343607 21.975623469475
29.80413028 235.93218046055 21.7224391107697
29.83013028 230.810492628925 21.4853667703823
29.85613028 228.198628616156 21.3634561162821
29.88213028 230.752560968437 21.4826702701706
29.90813028 215.23366101452 20.7477064281583
29.93413028 209.189842826757 20.4543317087974
29.96013028 224.077875146254 21.1696894236195
29.98613028 226.573974738651 21.2872720064667
30.01213028 223.361295974616 21.135813018411
30.03813028 222.878677697423 21.1129665228467
30.06413028 217.036077519314 20.834398360371
30.09013028 207.319690646432 20.3626958257708
30.11613028 219.638281527692 20.9589256178695
30.14213028 213.124754367153 20.6458109245994
30.16813028 231.817469841606 21.5321838112908
30.19413028 219.595585968569 20.9568884125754
30.22013028 213.011463078687 20.6403228210553
30.24613028 215.456017997742 20.758420845418
30.27213028 208.766605613868 20.4336294188707
30.29813028 229.919058318219 21.4438363320661
30.32413028 213.502298312602 20.6640895426148
30.35013028 221.13636695891 21.030281356126
30.37613028 234.71709103567 21.6664298413777
30.40213028 222.759801631476 21.1073352951753
30.42813028 211.474000215636 20.565699609575
30.45413028 213.206468185206 20.6497684338206
30.48013028 218.382311476582 20.8989143965222
30.50613028 220.12082229714 20.9819361497999
30.53213028 219.753007183319 20.9643987361106
30.55813028 212.643518990897 20.6224886466642
30.58413028 199.676443786431 19.9838156409847
30.61013028 204.106616280013 20.2042874796422
30.63613028 199.386854311203 19.9693191827465
30.66213028 218.144664601466 20.8875400467104
30.68813028 224.596146120737 21.1941570306883
30.71413028 228.450589089509 21.3752468565633
30.74013028 220.115069791816 20.9816619833518
30.76613028 216.361550744467 20.8019975360284
30.79213028 232.593980695451 21.5682164629091
30.81813028 198.079324550097 19.9037345515909
30.84413028 209.85576975482 20.4868626077699
30.87013028 218.797262905483 20.9187601403851
30.89613028 206.904259751227 20.3422840286546
30.92213028 214.254736663245 20.700470364861
30.94813028 225.333333333333 21.2289111041209
30.97413028 225.324559402501 21.2284977990672
31.00013028 222.024300377772 21.0724607190415
31.02613028 214.792890976765 20.7264512629039
31.05213028 194.560783769081 19.7261645420026
31.07813028 201.703544071316 20.0849965930451
31.10413028 212.800901451773 20.6301188291184
31.13013028 203.90234909582 20.1941748579049
31.15613028 200.222746229434 20.0111342122047
31.18213028 215.387563976441 20.7551229327335
31.20813028 216.666666666667 20.8166599946613
31.23413028 213.655302488584 20.6714925677167
31.26013028 206.185437646586 20.3069169322468
31.28613028 272.367234642887 22.102881507895
31.31213028 248.348976881565 21.5697520284017
31.33813028 256.967573775729 21.4271908421905
31.36413028 228.005656587255 22.2512276100837
31.39013028 253.390403156592 22.4204564129491
31.41613028 236.208998285786 21.7351787793791
31.44213028 226.074419364489 21.2637917298157
31.46813028 223.038449426285 21.1205326365736
31.49413028 222.666666666667 21.1029223884592
31.52013028 227.961760233517 21.352365687835
31.54613028 208.940448029709 20.4421353106621
31.57213028 196.621698101176 19.8303655085415
31.59813028 196.195660981232 19.808869780037
31.62413028 186.10261856085 19.2926213128673
31.65013028 219.402860224567 20.9476900981739
31.67613028 201.631148445762 20.0813918066334
31.70213028 193.565898614492 19.6756651025826
31.72813028 187.517809722893 19.3658363993344
31.75413028 195.476105494162 19.7725114992589
31.78013028 207.41377183159 20.3673155733194
31.80613028 198.334527967326 19.916552310444
31.83213028 200.318893939216 20.0159383461888
31.85813028 188.920450753418 19.4381300928571
31.88413028 199.683187622093 19.984153103001
31.91013028 192.982448960309 19.645989359679
31.93613028 203.06522061166 20.1526782642735
31.96213028 201.905355484618 20.0950419499248
31.98813028 196.718875895197 19.8352653571963
32.01413028 204.461231743758 20.2218313583987
32.04013028 214.624848500625 20.7183420427709
32.06613028 213.979499540154 20.6871699147154
32.09213028 213.354543458419 20.656937985017
32.11813028 206.653879980018 20.3299719616146
32.14413028 211.86408561215 20.5846586375461
32.17013028 214.050577060106 20.6906054556219
32.19613028 213.362844279061 20.6573398228843
32.22213028 220.807264721732 21.0146265596956
32.24813028 218.513228134399 20.9051777382733
32.27413028 213.662321633226 20.6718321216686
32.30013028 221.609920959664 21.0527870344838
32.32613028 236.557221481716 21.430885518295
32.35213028 260.973202843749 21.7807103700825
32.37813028 284.574649427159 22.4134749364655
32.40413028 285.950263369352 22.7807714708075
32.43013028 306.72793271104 23.7222209359157
32.45613028 335.495226427349 24.8017568447316
32.48213028 345.212237449169 25.1026835821646
32.50813028 372.221608125297 25.9679517367269
32.53413028 428.688012607441 27.5310065746418
32.56013028 484.347625826373 28.7542184060944
32.58613028 491.135788054291 29.2781627601547
32.61213028 566.344439430487 31.3523885794207
32.63813028 876.522842658095 36.7241839617914
32.66413028 1686.61030335858 46.6376856034008
32.69013028 2462.46669674664 54.8830689728244
32.71613028 1868.98835881518 51.7677671151809
32.74213028 735.409805382374 47.4353080179788
32.76813028 449.080176571314 52.3690616838891
32.79413028 407.260955586989 48.9593418758098
32.82013028 230.791085835447 34.7503365736423
32.84613028 222.496787056302 27.0667719248671
32.87213028 216.524857914394 25.1374237367598
32.89813028 249.666101496655 22.7848644803009
32.92413028 235.39995716667 21.4281598025045
32.95013028 274.413004701961 22.1746624847035
32.97613028 224.584092816518 21.1935883142293
33.00213028 202.002845017127 20.0998927866358
33.02813028 217.520594593318 20.8576410264113
33.05413028 206.856643969814 20.3399431646116
33.08013028 200 20
33.10613028 199.369986041498 19.9684744555761
33.13213028 189.980942587818 19.492611040485
33.15813028 164.520894473223 18.1395090602377
33.18413028 191.167740271911 19.5534007411453
33.21013028 197.831050057415 19.8912568761964
33.23613028 200.016167284947 20.0008083479117
33.26213028 195.136863786259 19.7553468097252
33.28813028 187.500261861315 19.3649302534925
33.31413028 177.28877540694 18.8302297068804
33.34013028 202.604150239572 20.1297863992429
33.36613028 191.197083489798 19.5549013543816
33.39213028 202.375025703496 20.118400816342
33.41813028 190.447468763425 19.51652985361
33.44413028 180.347069418386 18.9919493164017
33.47013028 206.065561569764 20.3010128599419
33.49613028 193.916830421899 19.693492855352
33.52213028 176.927590191525 18.8110387906423
33.54813028 206.165311396296 20.3059258048628
33.57413028 182.090158649328 19.083509040495
33.60013028 190.67371588467 19.5281190023346
33.62613028 205.194855593476 20.2580776774834
33.65213028 170.030435773188 18.4407394522664
33.67813028 164.156193329303 18.1193925576606
33.70413028 185.137412079833 19.2425264494989
33.73013028 192.973040547678 19.6455104564722
33.75613028 166.359522973682 18.2405878728555
33.78213028 178.321693846297 18.885004307455
33.80813028 188.544356211813 19.4187721657067
33.83413028 170.502280097831 18.4663087864268
33.86013028 191.498528468014 19.5703105988645
33.88613028 180.927080651822 19.0224646485056
33.91213028 163.467897217944 18.0813659449691
33.93813028 194.44998468105 19.7205468829366
33.96413028 191.292027031269 19.5597559816716
33.99013028 187.161179200745 19.3474121887525
34.01613028 187.227815964797 19.3508561032734
34.04213028 206.742038607645 20.334307886311
34.06813028 193.681159851341 19.6815222912935
34.09413028 187.293476435165 19.3542489616707
34.12013028 204.846121609025 20.2408557926302
34.14613028 216.198308197157 20.7941486095082
34.17213028 245.854416312036 20.8128726951025
34.19813028 243.359552516638 21.0022834874
34.22413028 219.868313530214 20.96989811755
34.25013028 215.828486705411 20.7763561148442
34.27613028 216.044167198391 21.4395866018163
34.30213028 266.713399329527 22.2592629811827
34.32813028 281.108474997017 22.170876629795
34.35413028 314.407879270815 22.9285078377806
34.38013028 293.995610298484 23.2564786059472
34.40613028 285.728787748146 23.6770144966329
34.43213028 264.937902461251 23.7853611892518
34.45813028 233.565374858526 23.1220521822063
34.48413028 210.015719029654 22.3198489289493
34.51013028 211.440628071501 21.9951125260513
34.53613028 217.354347260802 21.5089252651876
34.56213028 238.27788727347 21.3788761361725
34.58813028 236.136613804926 21.1289448798906
34.61413028 204.003670943985 20.1991916147149
34.64013028 195.885807601265 19.7932214458014
34.66613028 205.915555102017 20.2936224022237
34.69213028 226.557681928145 20.9793231805983
34.71813028 199.013609435425 19.9506195109538
34.74413028 192.54105947738 19.6235093435084
34.77013028 194.992420703192 19.7480338617895
34.79613028 206.978059670575 20.3459116124382
34.82213028 209.756456608911 20.482014383791
34.84813028 197.68280705639 19.8838028081345
34.87413028 209.314342424059 20.4604175140225
34.90013028 210.585168010804 20.5224349437782
34.92613028 207.266657815408 20.3600912480965
34.95213028 228.103789917255 20.9067291469557
34.97813028 236.807263536624 21.2013571971999
35.00413028 239.432803249262 21.166058348598
35.03013028 222.46672459059 20.9950219999949
35.05613028 201.475793755671 20.0736540647522
35.08213028 206.960511808969 20.3450491181009
35.10813028 214.147126987622 21.0642669461622
35.13413028 213.660261464748 20.6717324607662
35.16013028 233.362816130495 20.5409288785682
35.18613028 220.745429248132 20.5891390926523
35.21213028 209.137313179228 20.4517634046176
35.23813028 209.146937528839 20.8649356230483
35.26413028 209.907084427429 20.8801380239013
35.29013028 233.186246048059 21.1032346480032
35.31613028 258.089166875262 21.5625141355655
35.34213028 281.158589861671 22.1388271963002
35.36813028 274.840457977302 22.2753256169374
35.39413028 288.018633838023 23.09445186077
35.42013028 304.170730014373 23.9444321846611
35.44613028 319.730348905044 24.4317305581012
35.47213028 353.345846794094 25.1811857908674
35.49813028 359.192834874057 25.5839687438676
35.52413028 385.936250239109 26.4017092176646
35.55013028 461.723265230413 28.2362554944989
35.57613028 517.032965330633 29.5347390155249
35.60213028 540.274070346251 30.1931895204947
35.62813028 581.105862970833 31.6706632888644
35.65413028 637.874830431133 33.5442622653533
35.68013028 678.268436042636 34.7147987586592
35.70613028 661.795098843394 34.9315250532013
35.73213028 662.389328444826 35.6234331021585
35.75813028 522.610436877576 34.3209444109174
35.78413028 469.350841046197 33.733915131918
35.81013028 448.963034095453 33.3049757969831
35.83613028 366.948982627576 31.0203183534829
35.86213028 296.047756005918 28.1514477285561
35.88813028 222.815488295818 26.1050028657854
35.91413028 203.772877545963 24.7767573879659
35.94013028 215.504469192856 23.4333483736162
35.96613028 224.585632079472 22.0597979954184
35.99213028 207.047551978206 20.510340697705
36.01813028 201.903187735029 20.0949340747876
36.04413028 202.77798689638 20.5360838607396
36.07013028 200.638979334334 20.031923488988
36.09613028 190.228223425751 19.5052927907146
36.12213028 211.142037395746 20.2739509394716
36.14813028 192 19.5959179422654
36.17413028 192.242315505645 19.6082796545564
36.20013028 210.46012916244 20.1384302659925
36.22613028 208.42105834172 20.2379742023208
36.25213028 215.64141226287 20.1571876728338
36.27813028 196.896165412298 19.844201440839
36.30413028 192.792417866605 19.6363142094745
36.33013028 201.793376952673 20.313417721541
36.35613028 206.600406132903 20.3271853518018
36.38213028 222.356580610937 20.3141365690348
36.40813028 208.50547094796 19.9907062947102
36.43413028 195.873661752616 19.7926077995102
36.46013028 209.551642837868 20.5401991078049
36.48613028 197.014897467596 19.8501837506657
36.51213028 202.034778467986 20.087988113248
36.53813028 196.804922888126 19.8396029641788
36.56413028 178.613214516007 18.9004346254792
36.59013028 180.583557235296 19.0043972403913
36.61613028 185.863971674861 19.2802474919209
36.64213028 187.226381597636 19.3507819789091
36.66813028 174.05893167136 18.6579169079166
36.69413028 148.380954617168 17.2267788409307
36.72013028 163.848406473991 18.1023979888848
36.74613028 193.196418934606 19.6568776225832
36.77213028 181.427552172934 19.0487559789575
36.79813028 166.266151453796 18.2354682667485
36.82413028 158.712635242987 17.816432597071
36.85013028 144.663432403302 17.0096109540049
36.87613028 167.676450142603 18.3126431812889
36.90213028 180.121630862982 18.980075387784
36.92813028 185.715896401677 19.2725658074724
36.95413028 179.647947888257 18.955102104091
36.98013028 160.086406165803 17.8933734195541
37.00613028 162.208363803961 18.0115720471013
37.03213028 168.762952030924 18.3718780766107
37.05813028 162.284088561638 18.0157757846637
37.08413028 168.506436864329 18.35791038568
37.11013028 166.723622033469 18.2605378909532
37.13613028 170.27785426565 18.4541515256405
37.16213028 161.177469103535 17.9542456874988
37.18813028 162.416056696509 18.0230994391369
37.21413028 174.788716849252 18.6969899635878
37.24013028 176.07274844225 18.7655401436916
37.26613028 175.603832998658 18.7405353711498
37.29213028 165.625051804254 18.2002775695457
37.31813028 165.366841998225 18.1860849001771
37.34413028 154.659892757608 17.587489460273
37.37013028 149.782143919492 17.3079255787337
37.39613028 153.493913628037 17.5210680968962
37.42213028 160.670457904116 17.9259843748741
37.44813028 159.488298777187 17.8599159447735
37.47413028 153.044118067688 17.4953775648134
37.50013028 159.462791906802 17.8584877247096
37.52613028 161.653379974538 17.9807330203492
37.55213028 167.856120247186 18.3224518144917
37.57813028 173.474374425193 18.6265603064652
37.60413028 153.270115921506 17.5082903746486
37.63013028 153.217644096369 17.5052931478664
37.65613028 183.353795039307 19.1496107030565
37.68213028 176.66431847689 18.797037983517
37.70813028 164.386201614635 18.1320821537205
37.73413028 173.771638919719 18.6425126482306
37.76013028 171.853862277502 18.5393560987162
37.78613028 175.45270622663 18.7324694702343
37.81213028 172.404620513144 18.5690398520303
37.83813028 170.467412249192 18.4644205026419
37.86413028 172.229879311364 18.5596271143234
37.89013028 177.637922354771 18.8487624185129
37.91613028 168.305825587442 18.3469793474262
37.94213028 160.101244340421 17.8942026556324
37.96813028 168.223165549038 18.3424734182191
37.99413028 172.843528183657 18.59266135784
38.02013028 180.182545195075 18.9832844995314
38.04613028 183.865498586448 19.1763134406198
38.07213028 172.312821014892 18.5640955079902
38.09813028 179.020168182252 18.9219538199549
38.12413028 185.798640304 19.2768586810196
38.15013028 177.835619787341 18.8592481179575
38.17613028 189.716552276361 19.4790427011371
38.20213028 193.130676924646 19.6535328592417
38.22813028 171.157540654454 18.5017588706833
38.25413028 155.034146324763 17.6087561357844
38.28013028 154.857871855259 17.5987426741378
38.30613028 157.045453534245 17.7226100523735
38.33213028 156.447307391761 17.6888273999019
38.35813028 172.411684767833 18.5694202800105
38.38413028 181.688789760615 19.0624652005251
38.41013028 161.333333333333 17.96292478041
38.43613028 161.023464916682 17.9456660459668
38.46213028 161.266825543249 17.9592218953522
38.48813028 173.83744340074 18.6460421216268
38.51413028 182.418116865031 19.1006867345146
38.54013028 186.849968961357 19.3313201288147
38.56613028 164.211400266122 18.1224391441175
38.59213028 177.524134238957 18.842724550285
38.61813028 177.509799247915 18.8419637643169
38.64413028 158.050370578448 17.7792221752499
38.67013028 159.760559584847 17.8751536824077
38.69613028 174.701938798227 18.6923481028054
38.72213028 163.725266060434 18.0955942737692
38.74813028 158.382578105027 17.7978975221809
38.77413028 168.805036825412 18.3741686519642
38.80013028 174.128176897465 18.6616278441868
38.82613028 182.020332732006 19.0798497233079
38.85213028 185.320591756733 19.2520436191451
38.87813028 185.333333333333 19.2527054375915
38.90413028 178.824447054288 18.9116073909273
38.93013028 183.820856796135 19.1739853340997
38.95613028 173.797457528601 18.6438975286071
38.98213028 187.847346316336 19.3828453182878
39.00813028 177.426941408304 18.8375657348981
39.03413028 182.226995540359 19.0906781199809
39.06013028 167.386680227215 18.2968128496312
39.08613028 169.022922979285 18.3860231142727
39.11213028 160.363787321294 17.9088686030857
39.13813028 169.386366164388 18.4057798620101
39.16413028 176.514066773605 18.789042911953
39.19013028 164.61458005593 18.1446730505639
39.21613028 148.95041977262 17.2598041572099
39.24213028 151.185830070913 17.3888372279985
39.26813028 163.723891840006 18.0955183313442
39.29413028 146.691700426896 17.1284383658812
39.32013028 161.198395239169 17.9554111754184
39.34613028 189.024516393731 19.4434830415608
39.37213028 156.375546248034 17.6847700719028
39.39813028 168.725329385248 18.3698301236156
39.42413028 169.999344125316 18.4390533447526
39.45013028 181.466079960722 19.0507784597229
39.47613028 220.357367995697 19.4835596670088
39.50213028 176.23809859242 18.774349447713
39.52813028 169.127326399662 18.3917006500031
39.55413028 181.652410037072 19.0605566569852
39.58013028 171.632933305289 18.5274355109005
39.60613028 167.889149445744 18.3242543884188
39.63213028 165.872631668377 18.2138755715733
39.65813028 168.339127770617 18.3487943893116
39.68413028 181.311069406771 19.0426400169079
39.71013028 163.483615109978 18.0822352108348
39.73613028 161.223474109442 17.9568078515889
39.76213028 163.404410853342 18.077854455291
39.78813028 179.465316504927 18.9454647082054
39.81413028 188.494596397998 19.4162095372912
39.84013028 188.412753605946 19.4119939009854
39.86613028 195.164886574273 19.756765250125
39.89213028 182.553330268154 19.1077644044589
39.91813028 160.331880751401 17.907086907222
39.94413028 161.937726484159 17.9965400276919
39.97013028 167.527628774643 18.3045146766935
39.99613028 166.666666666667 18.2574185835055
40.02213028 160.437023910382 17.9129575397466
40.04813028 161.450523440314 17.969447595311
40.07413028 166.666666666667 18.2574185835055
40.10013028 156.961726982067 17.7178851436658
40.12613028 158.199703810442 17.7876195040507
40.15213028 161.332494694125 17.9628780931189
40.17813028 148.458218998787 17.2312633894782
40.20413028 150.323784088143 17.3391916817448
40.23013028 162.155109454508 18.0086151302374
40.25613028 164.105670059695 18.1166039896938
40.28213028 155.459443706144 17.63289220214
40.30813028 156.358307800593 17.683795282721
40.33413028 162.638170768494 18.0354190840409
40.36013028 156.068948524294 17.6674247429722
40.38613028 149.784754705873 17.3080764214787
40.41213028 150.826879107951 17.368182352103
40.43813028 162.963481768227 18.053447414177
40.46413028 153.269984623205 17.5082828754396
40.49013028 161.765266969249 17.9869545487417
40.51613028 172.185132264269 18.5572159692271
40.54213028 172.972399709678 18.5995913777522
40.56813028 171.221712967107 18.505226989535
40.59413028 162.441845232071 18.0245302425373
40.62013028 169.762565962774 18.4262077467272
40.64613028 178.764089696271 18.9084155706538
40.67213028 160.824623462636 17.9345824296322
40.69813028 148.889488079519 17.2562735304885
40.72413028 160.430882158821 17.9126146700486
40.75013028 155.139235693189 17.6147231424845
40.77613028 169.174942181074 18.3942894497762
40.80213028 178.655970221862 18.9026966447574
40.82813028 166.758612499907 18.2624539698206
40.85413028 148.655281949481 17.2426959579691
40.88013028 170.370348392459 18.4591629491946
40.90613028 162.68075239033 18.0377799293777
40.93213028 142.182811823519 16.8631439431394
40.95813028 157.640150251139 17.756134165473
40.98413028 151.142738909377 17.3863589580669
41.01013028 141.218248504834 16.8058471077678
41.03613028 145.005465337775 17.0297072985871
41.06213028 164.888810811971 18.1597803297271
41.08813028 151.809534550012 17.4246684071756
41.11413028 153.603162087251 17.5273022503323
41.14013028 148.060845504856 17.2081867438064
41.16613028 158.452373949034 17.8018186682729
41.19213028 161.449753628389 17.9694047552159
41.21813028 156.853164470857 17.7117567999822
41.24413028 158.333360228611 17.7951319314362
41.27013028 155.009220145684 17.6073405229571
41.29613028 159.587261430737 17.8654561335968
41.32213028 162.119312746567 18.0066272659022
41.34813028 140.928491301793 16.7885968026987
41.37413028 146.239608142991 17.1020237482581
41.40013028 135.078609382445 16.4364600436009
41.42613028 179.000439858706 18.9209111756652
41.45213028 155.428091786006 17.6311140763144
41.47813028 179.189956764045 18.9309247932606
41.50413028 175.396918598493 18.7294911088632
41.53013028 160.395885336218 17.910660810602
41.55613028 170.928269783394 18.4893628761726
41.58213028 155.427719900777 17.6310929837476
41.60813028 164.110811800383 18.1168878011861
41.63413028 187.094479965632 19.3439644316067
41.66013028 169.558888150358 18.4151507270702
41.68613028 161.292584005402 17.9606561130378
41.71213028 153.428863922304 17.5173550470557
41.73813028 184.879576483367 19.2291225220168
41.76413028 184.537223129883 19.2113103733131
41.79013028 161.25107990218 17.9583451298933
41.81613028 168.380434072629 18.3510454237697
41.84213028 180.831442481694 19.0174363404584
41.86813028 191.232508475224 19.4613070681602
41.89413028 178.525870810396 18.8958128065662
41.92013028 201.640064247015 19.2595086614944
41.94613028 214.639644110965 19.8767400753396
41.97213028 235.190691440013 20.5986999368982
41.99813028 221.567776689958 20.2151729420663
42.02413028 206.972984517971 20.1288458974022
42.05013028 224.08174704469 20.8702019032479
42.07613028 212.590514513636 21.0482770686982
42.10213028 222.986772103343 21.1344834975691
42.12813028 260.918979423048 21.686002433499
42.15413028 257.690058816394 21.8538100522641
42.18013028 225.852218741426 20.9821081524188
42.20613028 231.700948944761 21.2564991126661
42.23213028 198.577368582441 21.2266461796437
42.25813028 192.133602576801 21.2083366014366
42.28413028 211.990772200326 21.0771546152387
42.31013028 190.78171347378 20.5063253251789
42.33613028 175.235658765114 19.5132776801515
42.36213028 176.497770514637 18.7881755641487
42.38813028 172.942011370869 18.5979574884378
42.41413028 178.368234433424 18.8874685669321
42.44013028 167.790240582751 18.3188558912805
42.46613028 161.80124876605 17.9889548760372
42.49213028 166.97567272692 18.2743357048578
42.51813028 150.623126112153 17.3564469931005
42.54413028 141.523271882608 16.8239871542157
42.57013028 144.384859791863 16.9932256968395
42.59613028 156.392259502273 17.6857151114832
42.62213028 165.333333333333 18.1842422626478
42.64813028 156.207953164865 17.6752908414467
42.67413028 156.19307391204 17.6744490104806
42.70013028 164.073808599853 18.1148452160019
42.72613028 142.206901687763 16.864572433819
42.75213028 132.85467402143 16.3005934874427
42.77813028 151.305484629338 17.3957169802994
42.80413028 153.120109453813 17.4997205379865
42.83013028 148 17.2046505340853
42.85613028 145.191133183267 17.0406063966789
42.88213028 146.582221768741 17.1220455418586
42.90813028 151.402266820903 17.4012796552956
42.93413028 147.159645932982 17.1557364128143
42.96013028 144.380487863183 16.9929684200956
42.98613028 150.014930719047 17.3213700797048
43.01213028 148.673709528498 17.2437646428208
43.03813028 146.910599303995 17.1412134520281
43.06413028 154.22320430291 17.5626424152466
43.09013028 158.930710517604 17.8286685154895
43.11613028 166.058497315072 18.2240773327525
43.14213028 150.615334831217 17.3559980889154
43.16813028 149.333333333333 17.2819751957543
43.19413028 150.23774577572 17.3342288998224
43.22013028 154.414370737632 17.5735238775626
43.24613028 153.160005105853 17.502000177457
43.27213028 145.981497237529 17.0869246640541
43.29813028 152.74509243083 17.4782775141505
43.32413028 137.912419739307 16.6079751769628
43.35013028 145.857821242787 17.0796850815691
43.37613028 163.385862980863 18.0768284265168
43.40213028 159.271885744353 17.8477945833289
43.42813028 143.165985485749 16.9213466063283
43.45413028 145.387030719578 17.052098446794
43.48013028 145.933522283282 17.0841167335793
43.50613028 157.225039774901 17.7327403282686
43.53213028 146.169414372238 17.097918842493
43.55813028 155.995957170786 17.6632928510392
43.58413028 141.778505373201 16.8391511290327
43.61013028 140.766102430375 16.7789214450974
43.63613028 152.537780103923 17.4664123450652
43.66213028 148.773702266284 17.24956244467
43.68813028 148.32912595437 17.2237699679466
43.71413028 143.323307799895 16.9306413227553
43.74013028 146.635805217699 17.1251747563462
43.76613028 143.611523054666 16.9476560653482
43.79213028 155.55521720637 17.6383228911578
43.81813028 157.468026191916 17.7464377378625
43.84413028 157.877156288256 17.7694769922052
43.87013028 150.649400470189 17.3579607368025
43.89613028 156.812453896796 17.7094581451153
43.92213028 141.496881262961 16.8224184505654
43.94813028 144.582626051663 17.0048596613829
43.97413028 155.029103484679 17.6084697509283
44.00013028 148.126254383463 17.211987356692
44.02613028 152.245268103885 17.4496571945632
44.05213028 163.294269964325 18.0717608419503
44.07813028 160.028747489933 17.890150781362
44.10413028 190.096313699887 18.3715448105488
44.13013028 139.340453702914 16.6937385688715
44.15613028 150.331024751181 17.3396092661387
44.18213028 167.984602526968 18.3294627595556
44.20813028 152.796912413116 17.4812420847671
44.23413028 165.81985678526 18.2109778312566
44.26013028 148.019853265668 17.2058044430168
44.28613028 152.816122516455 17.4823409483087
44.31213028 152.116671886818 17.4422860822094
44.33813028 162.229169646124 18.0127271475545
44.36413028 152.621515336609 17.4712057589972
44.39013028 170.164889752361 18.4480291496062
44.41613028 162.774854968318 18.0429961463343
44.44213028 171.687948797078 18.5304046797191
44.46813028 193.040145670489 18.6852047056979
44.49413028 205.082465794502 19.2244868711034
44.52013028 209.397175594085 19.5516360651785
44.54613028 199.054297550209 19.2846112173288
44.57213028 191.152825996739 19.4029307147503
44.59813028 190.255195138964 19.7228729396071
44.62413028 190.022092046002 19.9182950926389
44.65013028 185.994103157575 19.7349891396273
44.67613028 174.081937683345 19.196923470816
44.70213028 188.729682830371 19.4646200014448
44.72813028 185.162709055707 19.3583972802076
44.75413028 186.995348529142 19.3505251241627
44.78013028 163.536839386071 18.0851784279874
44.80613028 160.458446873358 17.9141534476714
44.83213028 163.61873364434 18.0897061139389
44.85813028 166.347093135578 18.2399064216666
44.88413028 180.018326898358 18.7386848610435
44.91013028 163.085777186396 18.0602202193881
44.93613028 150.620500289095 17.3562957043889
44.96213028 144.237074864353 16.984526773764
44.98813028 144.618065911062 17.0069436355309
45.01413028 155.024318592574 17.608198010732
45.04013028 144.767874577543 17.0157500321051
45.06613028 150.577490667106 17.3538174859082
45.09213028 163.842066921219 18.1020477803601
45.11813028 153.762026349712 17.536363725112
45.14413028 140.176816406943 16.7437639977959
45.17013028 148.757915547012 17.2486472250441
45.19613028 156.949907908592 17.7172180608916
45.22213028 145.362349776047 17.0506510008297
45.24813028 152.585081822553 17.4691202882431
45.27413028 171.15062676659 18.5013851787692
45.30013028 164.934054686415 18.1622715917594
45.32613028 158.486493378563 17.803735191165
45.35213028 149.302564428791 17.2801946996434
45.37813028 145.079549246585 17.0340570180204
45.40413028 149.355947752213 17.283283701439
45.43013028 155.73563340569 17.6485485752053
45.45613028 163.112395680616 18.0616940335405
45.48213028 153.832103858844 17.5403593953399
45.50813028 145.695952915911 17.0702052076658
45.53413028 149.794816668854 17.3086577566751
45.56013028 151.552707644924 17.4099228972976
45.58613028 149.224489157 17.2756759148231
45.61213028 160.716708145606 17.9285642562703
45.63813028 170.645136122581 18.4740432024276
45.66413028 171.838961631819 18.5385523508077
45.69013028 171.25406257379 18.506975040443
45.71613028 165.680204950514 18.2033076637469
45.74213028 166.754453409072 18.2622262284242
45.76813028 158.334710731807 17.7952078229959
45.79413028 157.877452990064 17.7694936894704
45.82013028 167.160041535395 18.2844218686506
45.84613028 189.934727963268 18.9645091243233
45.87213028 206.179585074156 19.0879722261553
45.89813028 177.02016818225 18.8159596184861
45.92413028 197.08149499679 18.6605252602758
45.95013028 172.183766724347 18.557142383694
45.97613028 170.813169918214 18.4831366341438
46.00213028 179.839243296947 18.9651914462758
46.02813028 195.817137376384 19.7300369973713
46.05413028 192.45277535926 19.4998669532793
46.08013028 177.734900023306 18.8539067581924
46.10613028 224.442491657235 19.6562330518379
46.13213028 211.369522423224 19.7358105988408
46.15813028 204.126147654248 19.9551934556647
46.18413028 210.598715504666 19.9816830078498
46.21013028 225.524370799386 20.5434927412652
46.23613028 180.184212018285 19.9894985583871
46.26213028 210.978976361323 20.4772530513931
46.28813028 210.139354041775 20.3911747734796
46.31413028 243.759071948806 21.4153356487557
46.34013028 249.308700250465 21.4356320654733
46.36613028 241.862273924285 20.7701575339114
46.39213028 259.630229759524 21.673067624412
46.41813028 229.073245137595 21.1940111515011
46.44413028 211.194855357844 21.3534288493545
46.47013028 230.022305855719 21.824193158411
46.49613028 278.041952849046 22.9048744419791
46.52213028 223.92799582675 21.7606770332596
46.54813028 262.378949837879 22.0319881360216
46.57413028 295.914031225535 22.6293165777154
46.60013028 282.92687841851 22.9436372239347
46.62613028 290.069490030841 23.4844361511492
46.65213028 298.124274222001 23.0756874787914
46.67813028 345.561413310709 24.8343460837623
46.70413028 351.308793697904 25.3511311711782
46.73013028 368.810795913218 25.5519362198084
46.75613028 408.389513412705 26.4543557438552
46.78213028 519.178220614927 28.799511083272
46.80813028 641.264328683594 31.4223355987406
46.83413028 931.329627380768 35.8648973919998
46.86013028 1595.79378821287 44.4297519338715
46.88613028 2179.10033978501 51.1401165474646
46.91213028 1866.27719698604 49.1482386829967
46.93813028 1303.90994157912 44.9173264269254
46.96413028 765.065446986465 43.1491692467192
46.99013028 488.073614168308 47.1708848449632
47.01613028 387.024521146184 49.8231431490675
47.04213028 313.274452518403 45.1293754957998
47.06813028 244.430504234104 37.6091613199043
47.09413028 234.223377827396 30.5122995016087
47.12013028 197.172761290384 25.6907553151757
47.14613028 185.900318275381 23.5507237486275
47.17213028 178.599967254928 21.797893693309
47.19813028 173.157704133033 20.3605686598008
47.22413028 164.159978031923 19.7333839248862
47.25013028 178.446522543108 18.8916130885167
47.27613028 167.957076566306 18.3279609649468
47.30213028 197.348830965985 19.3455821302545
47.32813028 176.17004249789 18.7707241468138
47.35413028 163.821689079166 18.1009220250884
47.38013028 176.338867498346 18.7797160520784
47.40613028 185.50003399427 18.7788716344808
47.43213028 160.861749280962 17.9366523789118
47.45813028 160.169788581794 17.8980327735645
47.48413028 168.750462046086 18.3711982214599
47.51013028 165.335531156287 18.1843631263944
47.53613028 150.843048717323 17.3691133174565
47.56213028 152.951707804802 17.4900947856095
47.58813028 157.991241105837 17.7758961015099
47.61413028 156.492116909917 17.691360428747
47.64013028 143.76936591335 16.9569670586075
47.66613028 162.212466779899 18.01179984232
47.69213028 150.51754859689 17.3503630277231
47.71813028 136.708919188996 16.5353511718981
47.74413028 143.223863355683 16.9247666663788
47.77013028 147.457108228714 17.1730666002735
47.79613028 149.165817757908 17.2722793954885
47.82213028 145.798098366603 17.0761880035682
47.84813028 139.663657099782 16.713088110806
47.87413028 140.283424006449 16.7501297909269
47.90013028 142.304520194248 16.8703598179913
47.92613028 138.089152282292 16.6186131961901
47.95213028 144.087418889025 16.9757131743574
47.97813028 146.505232696075 17.1175484632628
48.00413028 152.415712560362 17.4594222447572
48.03013028 152.153402102732 17.4443917694331
48.05613028 145.159316833473 17.0387392041473
48.08213028 146.876557382216 17.1392273677792
48.10813028 149.469673396966 17.2898625441017
48.13413028 155.820269748688 17.6533435784096
48.16013028 146.600053619804 17.1230869658367
48.18613028 137.62271632682 16.590522374345
48.21213028 134.04124615528 16.3732248598301
48.23813028 130.323586286935 16.1445709938007
48.26413028 131.588513033372 16.2227317695493
48.29013028 129.737076453362 16.1082014174992
48.31613028 131.383802812384 16.2101081311868
48.34213028 145.902888708885 17.0823235368544
48.36813028 161.020482245078 17.9454998395184
48.39413028 149.700920572582 17.3032321011181
48.42013028 146.642746854593 17.1255800984722
48.44613028 156.437359366067 17.6882650006193
48.47213028 154.199811391554 17.561310394817
48.49813028 153.479944165991 17.5202707836375
48.52413028 150.440677493356 17.3459319434475
48.55013028 153.245150988512 17.5068644244772
48.57613028 149.328907614061 17.2817191051157
48.60213028 160.221539736848 17.9009239837975
48.62813028 165.671562318007 18.2028328739242
48.65413028 147.274952279837 17.1624562507723
48.68013028 139.98813581648 16.7324914950811
48.70613028 138.544113300558 16.6459672774254
48.73213028 131.396047561637 16.2108634909826
48.75813028 143.463204870229 16.9389022590148
48.78413028 138.450801927399 16.6403606888432
48.81013028 148.337738513504 17.224269999829
48.83613028 157.070334603316 17.7240139135195
48.86213028 141.568126510812 16.8266530546518
48.88813028 140.894159034374 16.7865517027396
48.91413028 136.270841477182 16.5088365112253
48.94013028 155.33370118671 17.6257596254295
48.96613028 133.27311998597 16.3262439027457
48.99213028 143.357068056508 16.9326352382911
49.01813028 156.556259149206 17.6949856823455
49.04413028 148.533889965913 17.2356543227064
49.07013028 132.47204212585 16.2771030669373
49.09613028 148.349665168089 17.2249624190062
49.12213028 139.229951316689 16.6871178647896
49.14813028 154.089266219615 17.5550144528346
49.17413028 154.953150852467 17.6041558077897
49.20013028 147.536144757509 17.1776683375544
49.22613028 125.088071585624 15.8169574562002
49.25213028 136.708772854012 16.5353423220695
49.27813028 161.641677162725 17.9800821556924
49.30413028 141.348165151777 16.8135757738666
49.33013028 143.328320566614 16.9309373967666
49.35613028 150.575523043098 17.3537041027613
49.38213028 158.487858918442 17.8038118906285
49.40813028 148.989399277713 17.2620624073552
49.43413028 142.281303691241 16.8689835906756
49.46013028 150.846900101501 17.369335053565
49.48613028 155.710479352037 17.6471232415959
49.51213028 150.431774588584 17.3454186797889
49.53813028 139.594693538807 16.7089612806306
49.56413028 148.959520478603 17.2603314266328
49.59013028 151.796541381649 17.4239227145697
49.61613028 160.291251716935 17.9048178832925
49.64213028 157.234011506914 17.7332462627074
49.66813028 152.613648872294 17.470755500109
49.69413028 146.276123196679 17.1041587455612
49.72013028 177.756045603471 18.0592550408334
49.74613028 149.63368172436 17.2993457520428
49.77213028 152.516393570529 17.4651878644651
49.79813028 150.724430599314 17.3622827185433
49.82413028 148.38205988482 17.2268430006673
49.85013028 153.326985100056 17.5115382020002
49.87613028 153.614499370097 17.5279490739845
49.90213028 155.930677266151 17.6595966695817
49.92813028 168.229039649333 17.7222869446042
49.95413028 152.887696863811 17.4864345630441
49.98013028 150.4996242014 17.3493299122128
50.00613028 158.554816101539 17.8075723276105
50.03213028 169.085361513407 18.152313153572
50.05813028 141.612121106942 16.8292674295076
50.08413028 142.689287441684 16.8931517155138
50.11013028 162.234480189569 17.7807877060734
50.13613028 156.847771138409 17.7114522915773
50.16213028 142.906969438214 16.9060326178683
50.18813028 129.065893847362 16.0664802522122
50.21413028 138.749560935817 16.658304891904
50.24013028 139.497866237153 16.7031653429614
50.26613028 127.889646273092 15.9931014048615
50.29213028 123.333333333333 15.7056253191863
50.31813028 139.878573294403 16.7259423228949
50.34413028 145.522822489638 17.0600599348091
50.37013028 131.055029674712 16.1898134439352
50.39613028 131.99663443833 16.2478696719496
50.42213028 147.679288803563 17.1859994648879
50.44813028 136.780502216819 16.539679695618
50.47413028 127.446693449036 15.9653808879736
50.50013028 133.97260936948 16.3690323091794
50.52613028 135.223818245634 16.4452922288194
50.55213028 130.813124808165 16.1748647480073
50.57813028 130.084894290896 16.1297795577557
50.60413028 134.726940160761 16.4150504209254
50.63013028 147.026660426178 17.1479829966196
50.65613028 156.339028870014 17.6827050458924
50.68213028 147.33238075684 17.1658020935137
50.70813028 136.113551560735 16.4993061406069
50.73413028 141.694830287244 16.8341813158374
50.76013028 142.534851222909 16.8840072982044
50.78613028 144.449206188573 16.9970118661236
50.81213028 151.270771796148 17.3937213842322
50.83813028 137.009327726797 16.5535088562393
50.86413028 137.769096960573 16.5993431774015
50.89013028 139.833607053241 16.7232536937786
50.91613028 134.066025999417 16.3747382268796
50.94213028 136.019967202956 16.4936331475485
50.96813028 149.782644778683 17.3079545168505
50.99413028 186.904317469663 17.9276079224969
51.02013028 145.688125205427 17.0697466416714
51.04613028 144.265570762527 16.9862044472876
51.07213028 141.566533096317 16.8265583585187
51.09813028 133.227777210926 16.3234663727363
51.12413028 140 16.7332005306815
51.15013028 137.172624064623 16.5633706753561
51.17613028 137.308245782542 16.571556703131
51.20213028 152.012253429759 17.4362985423947
51.22813028 147.027669117561 17.1480418192609
51.25413028 144.597122414421 17.0057121235437
51.28013028 148.142307731178 17.2129200155684
51.30613028 149.481849318979 17.2905667529424
51.33213028 170.21583597605 17.8578668774819
51.35813028 139.192292241475 16.6848609368778
51.38413028 145.469658360285 17.0569433580747
51.41013028 154.012367367045 17.5506334567756
51.43613028 152.274140535942 17.4513117292622
51.46213028 138.045043748906 16.6159588196953
51.48813028 152.173246687886 17.445529323462
51.51413028 132.250442242237 16.2634831596579
51.54013028 125.79891328862 15.8618355361931
51.56613028 136.642039513691 16.5313060290886
51.59213028 124.06777210507 15.7523186931366
51.61813028 145.834224174053 17.078303438811
51.64413028 144.056482256645 16.9738906710657
51.67013028 139.61196609146 16.7099949785426
51.69613028 142 16.8522995463527
51.72213028 142.959283923521 16.9091267618125
51.74813028 150.992093928012 17.3776922477072
51.77413028 122.734378625006 15.6674425880554
51.80013028 133.296749452407 16.3276911688338
51.82613028 132.936387839516 16.3056056520153
51.85213028 138.90020824151 16.6673458139867
51.87813028 145.584422769742 17.0636703419717
51.90413028 155.282711163123 17.6228664616811
51.93013028 151.933318125899 17.4317708868548
51.95613028 139.392333831934 16.6968460394132
51.98213028 139.990279848879 16.7326196304631
52.00813028 114.637065500844 15.1418007846388
52.03413028 128.805486218382 16.0502639366698
52.06013028 145.260881592894 17.0446989760977
52.08613028 143.478051725354 16.9397787308662
52.11213028 135.846866850049 16.4831348262428
52.13813028 137.185105368991 16.5641242067905
52.16413028 140.997188234323 16.7926881847025
52.19013028 157.642079121319 17.7562427963418
52.21613028 161.125571613502 17.9513549134043
52.24213028 196.605155666452 18.164038455518
52.26813028 196.373969646407 18.3678681251645
52.29413028 185.377280053949 18.3909350713328
52.32013028 228.992066991373 19.8942084381252
52.34613028 203.248791313127 19.393546364083
52.37213028 190.265985078722 19.4353804933497
52.39813028 165.406433135325 19.006851718894
52.42413028 151.431405881446 17.4029541102334
52.45013028 148.785293493671 18.9894996799657
52.47613028 146.64506961967 17.1257157292576
52.50213028 150.875617518072 17.3709883148928
52.52813028 157.730406994768 18.2275465066756
52.55413028 142.986119904293 16.9107137581057
52.58013028 132.46636712827 16.2767544140882
52.60613028 149.268167365941 17.2782040366435
52.63213028 154.841758360814 17.5978270454516
52.65813028 148.847145337091 17.2538195966627
52.68413028 148.101702413898 17.210560851634
52.71013028 145.364553955175 17.050780272772
52.73613028 151.441848410159 17.4035541433443
52.76213028 149.623159363613 17.2987374894015
52.78813028 133.324873465355 16.3294135513407
52.81413028 143.586962404598 16.946206797074
52.84013028 137.524349401226 16.5845922109183
52.86613028 147.713689898221 17.1880010413207
52.89213028 154.355348846173 17.5701649876245
52.91813028 147.222117250027 17.15937745083
52.94413028 146.473179791159 17.1156758435745
52.97013028 155.300471862617 17.6238742541257
52.99613028 147.233058930424 17.1600150891789
53.02213028 139.843722806777 16.7238585743109
53.04813028 141.438141036631 16.8189263056017
53.07413028 134.796675858037 16.4192981493143
53.10013028 145.351154179556 17.0499943800317
53.12613028 152.877503602533 17.4858516293907
53.15213028 154.415110476234 17.5735659714376
53.17813028 160.038659086087 17.8907047980837
53.20413028 161.358762695978 17.9643403828795
53.23013028 152.495871717823 17.4640128102234
53.25613028 144.331788206975 16.9901023073421
53.28213028 143.702316185869 16.9530124866272
53.30813028 134.01028580567 16.37133383727
53.33413028 141.29499234191 16.8104129837378
53.36013028 149.836209159117 17.3110490241994
53.38613028 133.870762944932 16.3628092297705
53.41213028 136.500744505736 16.5227567013338
53.43813028 150.198475924997 17.3319633005033
53.46413028 149.521609640874 17.2928661384326
53.49013028 142.240195190436 16.8665464864884
53.51613028 141.200006014673 16.8047615879948
53.54213028 147.201096245642 17.1581523623986
53.56813028 151.531734074916 17.4087181650411
53.59413028 150.269835110134 17.3360800130903
53.62013028 165.392553026 18.1874986199862
53.64613028 168.923900179008 18.3806365601961
53.67213028 150.382586785494 17.3425826672669
53.69813028 144.225935382755 16.9838709005194
53.72413028 144.829588794976 17.0193765335265
53.75013028 149.242815511082 17.2767367006088
53.77613028 151.398436829622 17.401059555649
53.80213028 153.490311511289 17.5208625079526
53.82813028 154.508346665981 17.578870650072
53.85413028 130.816421542595 16.1750685650847
53.88013028 130.502856140436 16.1556712110909
53.90613028 160.316171539877 17.9062096234729
53.93213028 148.207510128069 17.2167075904814
53.95813028 143.741364518195 16.9553156572324
53.98413028 148.489581306948 17.2330833751217
54.01013028 172.19334286477 18.5576584118132
54.03613028 156.253158285435 17.6778481883647
54.06213028 153.677090980605 17.5315196706164
54.08813028 170.667430122462 18.4752499372789
54.11413028 158.825746091306 17.8227801474016
54.14013028 133.688230462202 16.3516500979077
54.16613028 150.954103428961 17.3755059453796
54.19213028 161.704298846604 17.9835646547954
54.21813028 170.767042294515 18.4806408056926
54.24413028 162.422306029226 18.0234461759801
54.27013028 161.3402148235 17.9633078704062
54.29613028 165.09751875212 18.1712695622579
54.32213028 152.750339428293 17.478577712634
54.34813028 165.126831896641 18.1728826495216
54.37413028 149.499756353413 17.2916023753389
54.40013028 169.126074797026 18.3916325972996
54.42613028 174.945514587018 18.7053743393185
54.45213028 156.913108865443 17.715140917613
54.47813028 176.544220881671 18.7906477206972
54.50413028 153.899615691644 17.5442079155284
54.53013028 178.026070200646 18.8693439313955
54.55613028 179.952270281299 18.9711502171745
54.58213028 164.771078767552 18.1532960515468
54.60813028 171.877300298907 18.5406202862206
54.63413028 164.86212984669 18.1583110363652
54.66013028 209.180102665271 19.3747701728754
54.68613028 189.750144294275 19.4235121983483
54.71213028 210.928319020384 19.6762132727865
54.73813028 240.003809729108 20.2125293264786
54.76413028 242.393799708457 20.3298091028844
54.79013028 210.509225906514 19.6724882748735
54.81613028 205.845212086944 20.1952505574767
54.84213028 244.769991856295 20.9990352186125
54.86813028 211.446012112889 20.7672665672424
54.89413028 204.980012352837 21.095164273218
54.92013028 232.801475754913 21.543838127136
54.94613028 282.84844557366 22.1630860844284
54.97213028 270.732164261251 22.0963444871047
54.99813028 281.918040412798 22.7040198852017
55.02413028 301.911811163936 22.5983247424725
55.05013028 289.972702576979 22.4242720496574
55.07613028 288.065166203854 23.1374194729008
55.10213028 291.149983996447 23.8633783000298
55.12813028 321.726962291357 24.3912284378488
55.15413028 340.915921022506 25.0565177727419
55.18013028 342.790053030723 25.3035542584912
55.20613028 337.931295339176 25.0287287299532
55.23213028 349.886303351386 25.2570589078265
55.25813028 370.899135950571 25.8793952154152
55.28413028 410.6659235204 27.1425946075017
55.31013028 428.692656157719 27.7316678716866
55.33613028 454.383384068682 28.1915773569008
55.36213028 535.599796907794 29.5918515990619
55.38813028 616.721962564137 31.1622776017344
55.41413028 673.156998845002 32.4550408516345
55.44013028 690.293265561955 33.2315652480702
55.46613028 746.064461244893 34.3509155756294
55.49213028 912.263496558929 37.2259779636082
55.51813028 1141.34292363856 41.1768151518597
55.54413028 1483.86730550959 45.9626613526228
55.57013028 2206.04077381607 53.6771642305394
55.59613028 3394.85732215873 64.0029306926237
55.62213028 4577.41814079016 73.2158818663149
55.64813028 4658.5808319735 74.977312742319
55.67413028 3603.9728787171 69.4321337370211
55.70013028 2256.49480933504 62.4515120915992
55.72613028 1271.94923951574 61.1397354100164
55.75213028 798.653383919108 66.6681502061973
55.77813028 540.282709235021 71.5602151943519
55.80413028 448.560399149544 69.752767396994
55.83013028 410.17599818664 60.9679395850581
55.85613028 302.171344389934 48.4349793779209
55.88213028 224.179747023309 37.3467456320207
55.90813028 196.992799064583 30.6726219495468
55.93413028 205.652881218951 26.9433247851205
55.96013028 197.036719295651 25.2318041768883
55.98613028 190.91686701607 24.0615485264509
56.01213028 208.313306211766 22.2425292888127
56.03813028 215.364626722702 20.8269126136381
56.06413028 218.609713282418 20.4098430071693
56.09013028 196.834881611446 20.0070048012481
56.11613028 188.783847337075 19.5987105621028
56.14213028 192.539437065632 19.6435524051356
56.16813028 176.741393737755 18.8011379303357
56.19413028 157.454772751282 17.7456908995554
56.22013028 166.069505498373 18.2246813688675
56.24613028 173.3027298323 18.6173429807962
56.27213028 189.62293660284 19.4524078786037
56.29813028 199.07128012924 19.6487299866764
56.32413028 180.317659697594 18.9904007170778
56.35013028 161.813106593397 17.9896140366266
56.37613028 152.057015513535 17.4388655315382
56.40213028 159.852053700785 17.8802714577148
56.42813028 163.098953119282 18.0609497601473
56.45413028 156.197949024282 17.6747248365728
56.48013028 164.437122810987 18.1348902842552
56.50613028 164.416781398477 18.1337685768004
56.53213028 162.036639995773 18.0020354402369
56.55813028 144.839031312814 17.0199313343394
56.58413028 178.874985360578 18.91427954539
56.61013028 176.894829945741 18.8092971663346
56.63613028 168.913898362762 18.3800924025296
56.66213028 149.186561129011 17.273480316891
56.68813028 165.438485172822 18.1900239237238
56.71413028 157.812166729252 17.7658192453516
56.74013028 161.017841385328 17.9453526789154
56.76613028 167.277743506452 18.290858017406
56.79213028 172.601907306568 18.5796613158889
56.81813028 165.132911177145 18.173217171274
56.84413028 167.566829798128 18.306656155515
56.87013028 165.706915989162 18.2047749774152
56.89613028 173.480141967151 18.6268699446338
56.92213028 176.202824136524 18.7724704893375
56.94813028 196.523699713009 19.1896094450449
56.97413028 172.219898887971 18.5590893573996
57.00013028 198.461347170101 19.1323313538697
57.02613028 165.290560266464 18.1818899054232
57.05213028 184.220733495334 19.1948291732609
57.07813028 162.574525356556 18.0318898264467
57.10413028 145.854821210175 17.0795094314899
57.13013028 183.153016034577 19.1391230747167
57.15613028 174.579598270005 18.6858020041958
57.18213028 166.653849906653 18.2567165671515
57.20813028 153.452813807738 17.5187222027029
57.23413028 167.723044520289 18.3151873875366
57.26013028 179.654332551029 18.9554389319282
57.28613028 171.028127191038 18.4947628906692
57.31213028 159.884702333612 17.8820973229435
57.33813028 170.630463351469 18.4732489482207
57.36413028 161.397277771414 17.9664842287752
57.39013028 179.712713604529 18.9585185921542
57.41613028 175.863369590733 18.7543792001086
57.44213028 172.327538896049 18.5648883054032
57.46813028 213.007310892456 19.2554072416404
57.49413028 183.810962560994 19.1734693032322
57.52013028 194.239621249739 19.1235959485999
57.54613028 197.711591719956 19.4443100894269
57.57213028 179.600721353081 18.9526104456923
57.59813028 182.386560787508 19.0990345718054
57.62413028 181.378187772058 19.8391098772402
57.65013028 178.530853503749 18.8960764977151
57.67613028 179.666334389071 18.9560720820043
57.70213028 169.966461261743 18.4372699314049
57.72813028 173.145682827109 18.6089055469207
57.75413028 176.232008307079 18.7740250509622
57.78013028 165.848187279925 18.2125334470482
57.80613028 170.803479840459 18.4826123608357
57.83213028 182.368180642869 19.0980721876774
57.85813028 180.380122334134 18.9936896012404
57.88413028 200.385192947749 19.1033290644373
57.91013028 180.429806964533 18.9963052704747
57.93613028 176.950953029514 18.8122807245434
57.96213028 191.486474923537 18.9790862399632
57.98813028 184.917679482579 19.259337979158
58.01413028 196.985157278096 19.7092223556347
58.04013028 206.414974615424 20.1422065875895
58.06613028 226.287607159263 20.288432470685
58.09213028 252.795511480571 20.9367484490318
58.11813028 266.243987433633 21.372146235305
58.14413028 273.520497521508 21.4075342126875
58.17013028 311.682726543006 22.5204262026162
58.19613028 367.476204223704 23.9273664714002
58.22213028 460.336433559521 26.1600089398811
58.24813028 604.654882395361 29.2315745989089
58.27413028 868.097492254945 33.6503185172559
58.30013028 1375.85374947309 40.5936952888721
58.32613028 2085.02800415123 48.9105114555037
58.35213028 2235.04228935815 50.9517887629659
58.37813028 1838.63278994225 47.8377585619484
58.40413028 1359.41313164657 44.1317524289074
58.43013028 908.665086254409 41.7927180109567
58.45613028 586.825471218869 43.6339003688704
58.48213028 372.390579214607 48.7083114640087
58.50813028 315.624234605301 50.2629132098283
58.53413028 274.931998874633 46.4092304755451
58.56013028 206.80058293667 40.2399607102636
58.58613028 169.489659577173 33.6262182882742
58.61213028 154.662773934053 27.9334032912729
58.63813028 165.643512328405 23.7621057074982
58.66413028 141.479117455443 21.5318864643052
58.69013028 138.14853826538 20.4383734870582
58.71613028 165.360229460841 18.1857212923129
58.74213028 155.119154552987 17.6135830853911
58.76813028 156.182050692061 17.6738253183662
58.79413028 156.791729594223 17.7082878672233
58.82013028 166.411525720501 18.2434385859959
58.84613028 160.47105947599 17.9148574918133
58.87213028 159.989447565848 17.8879539112693
58.89813028 160.924014116294 17.9401234174291
58.92413028 152.902115718829 17.4872591173591
58.95013028 152.302552570198 17.4529397277477
58.97613028 145.931958942153 17.0840252248791
59.00213028 146.215460456347 17.1006117116521
59.02813028 136.515967894747 16.5236780345507
59.05413028 134.308165096674 16.3895189128098
59.08013028 153.702178531394 17.532950609147
59.10613028 149.510242284707 17.2922087822642
59.13213028 138.072419342741 16.6176062862701
59.15813028 141.556393625595 16.8259557604075
59.18413028 130.843336738626 16.1767324722038
59.21013028 140.454044871274 16.760312936892
59.23613028 140.697399141666 16.774826326473
59.26213028 139.038608473618 16.6756474221314
59.28813028 151.981703719284 17.4345463789158
59.31413028 152.962223809408 17.4906960301417
59.34013028 136.247205654572 16.5074047417862
59.36613028 144.098506904398 16.9763663311321
59.39213028 132.488820175448 16.2781338104494
59.41813028 138.961954856636 16.6710500483104
59.44413028 141.860255620824 16.8440052019004
59.47013028 144.988149999407 17.0286904957138
59.49613028 117.219368809168 15.3113924127865
59.52213028 132.053032831055 16.2513404266267
59.54813028 138.588195792459 16.6486153053315
59.57413028 142.179052983768 16.8629210389996
59.60013028 126.617231303695 15.9133422827321
59.62613028 163.012297686048 18.0561511782577
59.65213028 133.628176162175 16.3479770101487
59.67813028 194.13031564694 17.771775241882
59.70413028 156.666666666667 17.7012240631357
59.73013028 156.266594490588 17.6786082308867
59.75613028 142.72884763804 16.8954933421928
59.78213028 145.988357334877 17.0873261416102
59.80813028 144.668253724986 17.0098943985544
59.83413028 136.755567357234 16.5381720487625
59.86013028 134.708736424471 16.4139414172509
59.88613028 113.347724439317 15.0564088971651
59.91213028 138.243214291586 16.6278810611326
59.93813028 131.106948557609 16.193020012191
59.96413028 128.161930797943 16.0101174760177
59.99013028 139.771813003735 16.719558188166
60.01613028 132.698261498063 16.2909951505771
60.04213028 124.723927415788 15.7939182862131
60.06813028 126.998622601483 15.9372910246054
60.09413028 142.161074797722 16.8618548681764
60.12013028 185.316729650157 17.5574834193165
60.14613028 133.700297095559 16.3523880271696
60.17213028 143.571558575386 16.94529778879
60.19813028 151.666502116912 17.4164578555406
60.22413028 145.946242467024 17.0848612793329
60.25013028 156.288496919901 17.679847110193
60.27613028 132.966802219846 16.3074708167665
60.30213028 138.137148629476 16.6215010531225
60.32813028 125.726541380259 15.8572722358077
60.35413028 135.700987075491 16.4742822044234
60.38013028 133.089179177607 16.314973440224
60.40613028 136.984377830486 16.5520015605658
60.43213028 140.188016035272 16.7444328679876
60.45813028 150.176196961803 17.3306778264327
60.48413028 129.626770160835 16.1013521271249
60.51013028 134.976945722413 16.4302736265963
60.53613028 145.287227102492 17.046244577765
60.56213028 127.423563134282 15.9639320428447
60.58813028 152.053243344605 17.4386492220358
60.61413028 149.410752730443 17.2864543924104
60.64013028 152.900741498397 17.4871805330875
60.66613028 152.181424890741 17.4459981021861
60.69213028 145.805590621404 17.0766267524593
60.71813028 135.312940454597 16.4507106505827
60.74413028 139.221428977651 16.6866071433141
60.77013028 137.683151192579 16.5941647088716
60.79613028 133.170983215786 16.3199867166481
60.82213028 131.850879605895 16.2388964899648
60.84813028 143.772972061907 16.9571797219884
60.87413028 143.712060054183 16.9535872342217
60.90013028 138.388048945223 16.6365891303009
60.92613028 128.367946412124 16.0229801480326
60.95213028 128.91268954584 16.0569417726938
60.97813028 136.806150773571 16.541230351674
61.00413028 131.852978528245 16.2390257422202
61.03013028 140.155702858127 16.7425029704717
61.05613028 140.155767653522 16.7425068405852
61.08213028 141.977895120819 16.8509878120435
61.10813028 145.621748713642 17.0658576528484
61.13413028 140.289970040932 16.7505205913686
61.16013028 144.620934645382 17.0071123148747
61.18613028 145.369429067417 17.0510661876269
61.21213028 137.258572156949 16.5685589087856
61.23813028 142.863286580569 16.9034485582421
61.26413028 149.955010041654 17.3179103844346
61.29013028 131.267986925789 16.2029618851486
61.31613028 125.873233752505 15.8665203338668
61.34213028 130.711314813157 16.1685691892113
61.36813028 128.362963718768 16.0226691733162
61.39413028 130.658096893248 16.1652774113684
61.42013028 144 16.9705627484771
61.44613028 136.775031376663 16.5393489216875
61.47213028 130.002150388574 16.1246488574836
61.49813028 137.681983453864 16.5940943382797
61.52413028 141.545434584187 16.8253044301841
61.55013028 148.431699405131 17.2297242813187
61.57613028 137.080312702375 16.5577965141727
61.60213028 139.542781012087 16.7058541243534
61.62813028 139.594334365934 16.7089397847939
61.65413028 131.014166409499 16.1872892362803
61.68013028 118.73396566158 15.4099945270321
61.70613028 133.63402353626 16.3483346880507
61.73213028 136.017760699496 16.4934993679023
61.75813028 148.898262010317 17.2567819717534
61.78413028 154.275880285421 17.5656414790591
61.81013028 140.075425731538 16.7377074733392
61.83613028 144.067010973608 16.9745109486906
61.86213028 139.99381313839 16.7328307908967
61.88813028 133.89682446507 16.364401881222
61.91413028 139.70722137144 16.7156945037554
61.94013028 143.629636570859 16.9487248234703
61.96613028 143.869433834547 16.9628673186197
61.99213028 152.666666666667 17.4737898961082
62.01813028 152.045007319364 17.4381769299066
62.04413028 149.248636843644 17.2770736436263
62.07013028 151.672484821141 17.4168013608206
62.09613028 147.594996596793 17.1810940627652
62.12213028 177.839945020419 17.759515017071
62.14813028 184.615392238958 18.1600466146933
62.17413028 167.026721002705 17.8628850633569
62.20013028 177.174276074083 18.0813337609069
62.22613028 160.066058397111 17.8922362155831
62.25213028 147.443463217465 17.172272023088
62.27813028 197.448930734372 18.9609257704125
62.30413028 162.987969893791 18.5180855076693
62.33013028 164.091083870775 18.4701035516322
62.35613028 184.050789497436 18.8275784732893
62.38213028 193.312461891432 19.0942012575668
62.40813028 198.535440437442 18.8094014250229
62.43413028 219.146046991892 19.5623838216137
62.46013028 198.25858338281 19.5456703039967
62.48613028 209.553468635186 19.2976723597829
62.51213028 179.429236355236 18.7178693938408
62.53813028 196.425417517692 19.5767951330853
62.56413028 159.628848972887 18.8197712302519
62.59013028 160.790589146609 19.1331557787509
62.61613028 168.726823441062 19.4851641749006
62.64213028 168.707806723235 19.242786583502
62.66813028 154.428651199302 18.7808730639171
62.69413028 153.042746171592 17.4952991498627
62.72013028 144.233229836349 16.9843003880848
62.74613028 156.7897232163 17.7081745652283
62.77213028 156.352884394774 17.683488592174
62.79813028 138.845078812437 16.66403785476
62.82413028 139.391295067187 16.6967838260658
62.85013028 128.8279803438 16.0516653555823
62.87613028 134.394472361913 16.3947840706679
62.90213028 157.814850374716 17.7659703013776
62.92813028 145.965218339611 17.0859719266778
62.95413028 139.339292320371 16.6936689987774
62.98013028 143.39640673451 16.9349583249862
63.00613028 135.845165854408 16.4830316297948
63.03213028 143.579272348585 16.9457529988245
63.05813028 124.416654748836 15.7744511631205
63.08413028 142.286694699356 16.8693031687356
63.11013028 130.968572042687 16.1844723140847
63.13613028 142.461825147378 16.879681581557
63.16213028 132.081318215667 16.2530808289178
63.18813028 128.168980015951 16.0105577676701
63.21413028 138.653191707639 16.652518830954
63.24013028 137.613508039731 16.5899673320794
63.26613028 138.502675700246 16.6434777435634
63.29213028 132.415478329615 16.2736276428837
63.31813028 143.610804708924 16.947613679154
63.34413028 140.943286690658 16.7894780556548
63.37013028 136.185940830111 16.5036929703694
63.39613028 136.246977779999 16.5073909373952
63.42213028 140.130740249467 16.7410119317482
63.44813028 158.518574032464 17.8055370058004
63.47413028 160.26993633507 17.9036273606814
63.50013028 140.903636274238 16.7871162666039
63.52613028 146.797916455834 17.1346383945407
63.55213028 156.480001134634 17.6906755741342
63.57813028 155.333333333333 17.625738755203
63.60413028 162.301963198423 18.0167679231555
63.63013028 166.206309847432 18.2907707320376
63.65613028 161.403976497054 17.9668570705649
63.68213028 163.924916080322 18.1066239857308
63.70813028 163.534099625667 18.0850269353224
63.73413028 153.996376490394 17.549722304948
63.76013028 144.779211860353 17.0164163007581
63.78613028 147.319247609666 17.165037000232
63.81213028 162.002135351892 18.0001186302697
63.83813028 158.168440402888 17.7858618235321
63.86413028 156.887793440085 17.7137118323679
63.89013028 161.689163970175 17.9827230401947
63.91613028 146.82695025956 17.1363327616827
63.94213028 146.177089391562 17.0983677227718
63.96813028 141.232732155242 16.8067089077691
63.99413028 135.644900421222 16.4708773549694
64.02013028 156.521864410725 17.6930418193551
64.04613028 154.027207865996 17.5514790183617
64.07213028 144.208021992103 16.9828161382088
64.09813028 142.693857171643 16.8934222211868
64.12413028 151.926496782464 17.4313795657408
64.15013028 152.75120178469 17.4786270504688
64.17613028 161.103277613621 17.9501129586207
64.20213028 157.154680600647 17.7287721289799
64.22813028 146.533666123185 17.1192094515597
64.25413028 158.805593799492 17.8216494073636
64.28013028 159.497965137756 17.8604571687152
64.30613028 154.220473223068 17.5624869094937
64.33213028 149.452430917679 17.2888652558622
64.35813028 150.359370282525 17.3412439163126
64.38413028 143.683241412676 16.9518872939078
64.41013028 146.726155312109 17.1304498079945
64.43613028 142.527799680575 16.8835896467887
64.46213028 149.409064447189 17.286356727037
64.48813028 147.885923862881 17.1980187151242
64.51413028 129.150171017438 16.071724924067
64.54013028 120.993272054759 15.5559166913916
64.56613028 146.252928086531 17.102802582415
64.59213028 152.179280858262 17.4458752063783
64.61813028 142.5326320071 16.8838758587654
64.64413028 126.339934012122 15.8959072727619
64.67013028 154.095560662336 17.5553730044301
64.69613028 156.26769107773 17.6786702598205
64.72213028 186.157931264641 17.3564234531368
64.74813028 134.105272132948 16.3771348002603
64.77413028 144.435017532463 16.9961770720632
64.80013028 137.916393741275 16.6082144579889
64.82613028 151.340915808232 17.3977536370781
64.85213028 167.678523549632 18.1014258668976
64.87813028 154.298492379972 17.5669287230279
64.90413028 157.04545585857 17.7226101835237
64.93013028 130.019620742438 16.1257322774774
64.95613028 159.424522066951 17.8563446464807
64.98213028 161.304160167623 17.96130063039
65.00813028 133.802138871491 16.3586147868022
65.03413028 165.834128598604 18.2232310869638
65.06013028 160.032960371319 17.890386265887
65.08613028 139.651924214565 16.7123860782693
65.11213028 144.531530771292 17.001854650084
65.13813028 132.446630124216 16.2755417804887
65.16413028 128.817275218487 16.0509984249259
65.19013028 131.186387044992 16.1979249933436
65.21613028 138.813116127661 16.6621196807406
65.24213028 132.549629250799 16.2818690113143
65.26813028 127.119315924653 15.9448622398974
65.29413028 132.097902495942 16.2541011745308
65.32013028 141.619503456314 16.8297060851527
65.34613028 124.95943893894 15.8088227859598
65.37213028 137.257318230012 16.5684832275023
65.39813028 131.255176521951 16.2021712447407
65.42413028 133.992774373643 16.3702641624162
65.45013028 142.559607349857 16.8854734816562
65.47613028 141.771333537401 16.8387252211919
65.50213028 134.726712286187 16.4150365388681
65.52813028 126.806090626841 15.9252058465089
65.55413028 147.900858613769 17.1988870927028
65.58013028 150.679797489506 17.3597118345614
65.60613028 126.415846182991 15.9006821352413
65.63213028 128.7971165705 16.0497424633855
65.65813028 137.463684336562 16.5809338902585
65.68413028 140.846076498977 16.783687109749
65.71013028 143.821497634136 16.9600411340383
65.73613028 148.594810654181 17.2391885339294
65.76213028 138.858727855482 16.6648569064053
65.78813028 125.110901166726 15.8184007514493
65.81413028 139.237923037831 16.687595575027
65.84013028 138.304612738675 16.6315731510086
65.86613028 119.554524902146 15.4631513542451
65.89213028 124.852545025723 15.8020596775055
65.91813028 139.560945994508 16.7069414313038
65.94413028 127.352234022506 15.9594632755933
65.97013028 126.433383039762 15.901784996645
65.99613028 133.215882954041 16.3227376964798
66.02213028 133.411903108143 16.3347423063936
66.04813028 126.080432142013 15.8795738067502
66.07413028 131.3155703095 16.2058983280471
66.10013028 124.982625368656 15.8102893944833
66.12613028 135.864625225208 16.4842121574073
66.15213028 136.23720616266 16.5067989727058
66.17813028 131.966581555201 16.2460199159795
66.20413028 125.585386351114 15.8483681400398
66.23013028 128.658737731245 16.04111827344
66.25613028 130.108143191605 16.1312208584227
66.28213028 125.445968747114 15.8395687281639
66.30813028 134.243154144854 16.3855518152337
66.33413028 140.666666666667 16.7729941672122
66.36013028 138.34083744673 16.633751077056
66.38613028 133.394828356696 16.3336969701716
66.41213028 134.81407738466 16.4203579366992
66.43813028 142.145083921069 16.8609064952671
66.46413028 136.465079096096 16.520597997415
66.49013028 141.258537434967 16.8082442530424
66.51613028 141.567954751119 16.8266428470518
66.54213028 122.575316561384 15.6572869017198
66.56813028 128.666666666667 16.0416125540213
66.59413028 133.303035214624 16.3280761398656
66.62013028 142.395014299311 16.8757230540982
66.64613028 144.702510808989 17.0119082297659
66.67213028 137.861890113525 16.6049324065788
66.69813028 131.723876803323 16.2310737046766
66.72413028 138.980425221373 16.6721579419926
66.75013028 142.705014014186 16.894082633525
66.77613028 131.257709800588 16.202327598255
66.80213028 119.596585979445 15.4658711994795
66.82813028 112.639581418464 15.0093025433205
66.85413028 120.403947277439 15.5179861629942
66.88013028 132.067133591401 16.2522080709915
66.90613028 135.66746104958 16.4722470264127
66.93213028 153.357833836678 17.5132997368673
66.95813028 136.919283014704 16.5480683473754
66.98413028 134.347009271657 16.3918888034087
67.01013028 132.162427625293 16.2580704651747
67.03613028 124.269415790529 15.7651143852831
67.06213028 135.018755207943 16.4328180911214
67.08813028 150.912051032169 17.3730855654468
67.11413028 140 16.7332005306815
67.14013028 137.591321620963 16.5886299386636
67.16613028 128.890404226466 16.0555538195645
67.19213028 134.596038539629 16.4070739950565
67.21813028 144.017158615367 16.9715737994664
67.24413028 144.864144905122 17.0214068105502
67.27013028 132.201482313794 16.260472460159
67.29613028 132.95682815263 16.3068591796599
67.32213028 131.45426956776 16.2144546357724
67.34813028 136.666666666667 16.532795690183
67.37413028 138.078019156912 16.617943263648
67.40013028 147.709328974331 17.1877473203635
67.42613028 134.310165118463 16.3896409428921
67.45213028 143.346754501733 16.9320261340297
67.47813028 135.187021526818 16.4430545536295
67.50413028 124.419422258224 15.77462660466
67.53013028 121.911998095364 15.6148645908547
67.55613028 144.191046141263 16.9818165189277
67.58213028 133.611049944507 16.3469293718733
67.60813028 142.029495909046 16.8540497156645
67.63413028 143.105606734882 16.9177780299235
67.66013028 124.67425782207 15.7907731173664
67.68613028 127.9745168468 15.9984072236457
67.71213028 145.683789706247 17.0694926524632
67.73813028 149.241701562922 17.2766722237196
67.76413028 149.333333333333 17.2819751957543
67.79013028 153.143996868188 17.5010855016589
67.81613028 145.162888876857 17.0389488453283
67.84213028 134.716572815465 16.4144188331762
67.86813028 131.538935984083 16.2196754581639
67.89413028 144.115007320755 16.9773382672759
67.92013028 139.9150068085 16.7281204448378
67.94613028 157.791397316627 17.7646501410316
67.97213028 137.625350830385 16.590681169282
67.99813028 138.159816838911 16.6228647855242
68.02413028 154.207241175294 17.5617334665627
68.05013028 158.373552582462 17.7973904032283
68.07613028 179.470895372995 17.8454655844344
68.10213028 157.330152860517 17.7386669657287
68.12813028 156.431568106871 17.6879375907351
68.15413028 182.832555965662 17.926101168752
68.18013028 159.413025736805 17.8557008116067
68.20613028 178.058371465427 18.0796469390379
68.23213028 159.498901217954 18.0197002252716
68.25813028 175.393082660988 18.7122166736785
68.28413028 212.846343256753 19.6272380486317
68.31013028 207.396769052564 19.2585624942091
68.33613028 216.478222880067 19.7411715724504
68.36213028 208.914087174619 19.6498638069109
68.38813028 263.749606658568 20.9669216706702
68.41413028 314.227021017275 21.9301622396774
68.44013028 367.374739082535 23.1388405205043
68.46613028 508.807968394085 26.5499232500455
68.49213028 824.085645050037 32.1414691439907
68.51813028 1121.28325312361 36.5107266423291
68.54413028 994.493415695939 34.7269084290817
68.57013028 662.794557395252 30.0231128660803
68.59613028 387.64113670101 26.0435566511582
68.62213028 280.184529576054 24.9475995848117
68.64813028 270.890925485473 26.7187530952434
68.67413028 249.22889866948 30.4401064219728
68.70013028 178.817202072537 34.0508647319063
68.72613028 181.115478488984 35.0813776175063
68.75213028 157.67151988736 31.1909221176529
68.77813028 134.822011917967 25.5045720789132
68.80413028 147.401141199885 21.8518566651139
68.83013028 135.711523440661 20.2497796060411
68.85613028 136.631266826237 19.8841010535271
68.88213028 163.771208897291 19.3929129509097
68.90813028 179.860528385707 18.9523477759198
68.93413028 165.554192892295 18.2808964856239
68.96013028 156.024650870168 17.6649172582363
68.98613028 158.661653899947 17.8135708885078
69.01213028 147.337486067994 17.1660995026823
69.03813028 134.984263893198 16.4307190282835
69.06413028 139.998068805491 16.7330851193371
69.09013028 150.203213382763 17.3322366348237
69.11613028 153.022473586318 17.494140366781
69.14213028 148.459919994391 17.2313621048593
69.16813028 150.747608348449 17.3636176154884
69.19413028 150.053080265435 17.323572395175
69.22013028 138.325975554922 16.6328575749883
69.24613028 130.676608336184 16.1664225069237
69.27213028 134.602126500635 16.407445047943
69.29813028 145.005794437284 17.0297266236005
69.32413028 143.728661695469 16.9545664465635
69.35013028 137.95201000903 16.6103588166559
69.37613028 142.91997531893 16.9068019044957
69.40213028 150.616861742805 17.3560860647097
69.42813028 138.735929253786 16.6574865603299
69.45413028 130.878426105662 16.17890145255
69.48013028 129.897321292417 16.1181463755866
69.50613028 120.313715768985 15.5121704328559
69.53213028 114.545246317241 15.1357356159019
69.55813028 138.630433278108 16.6511521089748
69.58413028 141.82131486961 16.8416931969212
69.61013028 136.343295541885 16.5132247330366
69.63613028 127.790939243152 15.9869283630817
69.66213028 139.773914250421 16.7196838636633
69.68813028 124.740062303089 15.7949398418031
69.71413028 133.417556712865 16.3350884119349
69.74013028 131.472329293396 16.2155684015946
69.76613028 133.588573180102 16.3455543301598
69.79213028 137.233142794344 16.5670240414109
69.81813028 127.120603956827 15.9449430200818
69.84413028 137.133917544194 16.5610336358691
69.87013028 144.19933192522 16.982304432863
69.89613028 132.481917292463 16.2777097463042
69.92213028 123.707677120616 15.7294422736864
69.94813028 145.633741871131 17.0665603957641
69.97413028 138.428280052946 16.6390071851025
70.00013028 134.991177781063 16.4311398132365
70.02613028 122.26058806917 15.6371728946872
70.05213028 131.20322524136 16.1989644879764
70.07813028 136.666666666667 16.532795690183
70.10413028 137.687200377966 16.5944087196842
70.13013028 165.568105927824 17.0603902163022
70.15613028 173.994247896695 17.9115205256502
70.18213028 144.401233558616 16.994189216236
70.20813028 138.65763881977 16.6527858822342
70.23413028 179.480102458814 17.3020696866182
70.26013028 140.686762843593 16.7741922514077
70.28613028 142.666582802746 16.8918076476584
70.31213028 142.0065309978 16.8526870853167
70.33813028 135.464791928544 16.4599387561767
70.36413028 134.039521442412 16.3731195220955
70.39013028 157.044579044999 17.3948733392419
70.41613028 141.960151782345 16.849934823752
70.44213028 134.435658370462 16.3972960191894
70.46813028 150.752055460578 17.3638737302814
70.49413028 148.317010179087 17.2230665201692
70.52013028 135.248447722942 16.446789821904
70.54613028 152.018057401306 17.4366314063988
70.57213028 137.36836255364 16.5751840142811
70.59813028 144.731288372287 17.0135997585629
70.62413028 139.611669389648 16.7099772225846
70.65013028 144.408091331593 16.9945927477885
70.67613028 140.793112495161 16.7805311295657
70.70213028 131.025396111194 16.1879829571935
70.72813028 137.647801553277 16.592034326946
70.75413028 138.237967294116 16.6275655039525
70.78013028 136.917863684225 16.5479825769926
70.80613028 136.1322133705 16.5004371681783
70.83213028 119.637008532193 15.4684846402091
70.85813028 132.533711233234 16.2808913289926
70.88413028 133.731072356312 16.3542699229474
70.91013028 141.30256210446 16.8108632797046
70.93613028 128.958630373164 16.0598026372159
70.96213028 120.04188699328 15.4946369427153
70.98813028 124.524457836094 15.7812837143303
71.01413028 132.926613897842 16.3050062188177
71.04013028 128.209540223178 16.0130909085772
71.06613028 122.991809938488 15.6838649534155
71.09213028 131.695486161922 16.2293244567925
71.11813028 127.353575845242 15.9595473523056
71.14413028 131.405615021597 16.2114536684159
71.17013028 137.100714261619 16.5590286104964
71.19613028 134.953387407549 16.4288397282065
71.22213028 137.619488419627 16.5903278098793
71.24813028 140 16.7332005306815
71.27413028 142.076928925935 16.8568638201734
71.30013028 146.603500721061 17.1232882777264
71.32613028 141.830013616999 16.8422096897645
71.35213028 128.631426932804 16.039415633545
71.37813028 121.110961313455 15.5634804149621
71.40413028 129.940098391126 16.1208001284754
71.43013028 135.830546873889 16.4821446950262
71.45613028 139.095647704345 16.6790675821129
71.48213028 139.766931535317 16.7192662240493
71.50813028 146.229634075781 17.1014405285509
71.53413028 152.603051328093 17.4701489019466
71.56013028 136.600574164341 16.5287975463638
71.58613028 132.410882558167 16.2733452343498
71.61213028 145.623318410951 17.0659496314123
71.63813028 146.105556122408 17.0941835793587
71.66413028 142.034340947924 16.8543371835219
71.69013028 139.785593345082 16.7203823727259
71.71613028 143.149863310802 16.9203938081123
71.74213028 146.37015059125 17.1096552034955
71.76813028 140.059335954208 16.7367461565388
71.79413028 131.004895651352 16.1867165077635
71.82013028 122.780385955243 15.6703788055837
71.84613028 130.095764819715 16.1304534852381
71.87213028 141.473512068795 16.8210292234925
71.89813028 137.330488316207 16.5728988602602
71.92413028 130.499914547035 16.1554891319969
71.95013028 128 16
71.97613028 130.367845187185 16.1473121718251
72.00213028 135.817514951655 16.4813540069774
72.02813028 135.540897251958 16.4645617768562
72.05413028 136.307104939108 16.5110329742937
72.08013028 144.424473778817 16.995556700433
72.10613028 138.500058557688 16.6433204954834
72.13213028 141.681189924705 16.8333710185871
72.15813028 137.809489439964 16.6017763772413
72.18413028 137.861178123952 16.6048895283258
72.21013028 146.404743130936 17.1116768980095
72.23613028 142.511907704524 16.8826483529406
72.26213028 142.851852721491 16.9027721230271
72.28813028 141.694426004321 16.8341573002228
72.31413028 147.523837537192 17.1769518563214
72.34013028 138.017274876982 16.614287518698
72.36613028 128.476108672251 16.0297291725251
72.39213028 137.869053268818 16.6053637881751
72.41813028 137.457665202794 16.5805708709196
72.44413028 139.412604092877 16.6980600126408
72.47013028 143.666854933609 16.9509206200495
72.49613028 129.910254313979 16.1189487445043
72.52213028 120.036880582735 15.4943138333219
72.54813028 129.642636095394 16.1023374759936
72.57413028 139.57678650433 16.7078895438251
72.60013028 139.631724488371 16.7111773665635
72.62613028 172.628289575316 17.4463083627303
72.65213028 134.777577367652 16.4181349347392
72.67813028 140.778151702753 16.779639549332
72.70413028 128.206273562116 16.0128869078699
72.73013028 130.666666666667 16.1658075373095
72.75613028 131.548456009663 16.2202623905819
72.78213028 146.22206663756 17.100998019856
72.80813028 150.315141455638 17.3386932296317
72.83413028 141.481285988723 16.8214913719755
72.86013028 146.714183547477 17.1297509349948
72.88613028 149.159609503433 17.2719199571694
72.91213028 127.377899940231 15.9610713888655
72.93813028 154.340086703288 17.569296326449
72.96413028 125.974863307324 15.8729243246053
72.99013028 135.015407007298 16.4326143390087
73.01613028 129.583622884445 16.0986721740922
73.04213028 122.378672930291 15.6447226201228
73.06813028 140.143182799925 16.7417551529059
73.09413028 133.286175625392 16.32704355512
73.12013028 157.162557453024 17.7292164210957
73.14613028 142.977208319013 16.9101867712342
73.17213028 139.535830694683 16.7054380783434
73.19813028 134.00035917287 16.3707274837052
73.22413028 143.8802141432 16.9635028306774
73.25013028 142.436718528067 16.8781941289978
73.27613028 139.709167602672 16.7158109347212
73.30213028 138.201146858111 16.6253509351298
73.32813028 144.713740510682 17.0125683252519
73.35413028 136.048456744957 16.4953603625357
73.38013028 130.176259432862 16.1354429398676
73.40613028 138.507107775694 16.6437440364657
73.43213028 146.529874885732 17.118987989115
73.45813028 135.366302385164 16.45395407707
73.48413028 151.23220060587 17.3915037076079
73.51013028 142.297785039065 16.8699605831825
73.53613028 158.768938766993 17.8195925187415
73.56213028 141.835936174503 16.842561335765
73.58813028 133.01334048264 16.3103243672614
73.61413028 120.498794242699 15.5240970264102
73.64013028 149.607002466631 17.2978034713446
73.66613028 137.571952470295 16.5874622815122
73.69213028 144.140664557977 16.9788494638463
73.71813028 152.714099683557 17.4765042089977
73.74413028 148.796927449799 17.2509088137292
73.77013028 136.385074954125 16.5157545969977
73.79613028 147.628535335058 17.1830460242099
73.82213028 150.360651958526 17.3413178252707
73.84813028 146.478971050395 17.1160142001808
73.87413028 148.52339767849 17.2350455571484
73.90013028 152.897659926191 17.4870043132717
73.92613028 148.556618321996 17.2369729547851
73.95213028 144.265944972082 16.9862264774777
73.97813028 147.941068328638 17.201224859215
74.00413028 151.441650608952 17.4035427777767
74.03013028 152.380877109422 17.4574269071603
74.05613028 152.666666666667 17.4737898961082
74.08213028 160.754909158219 17.9306948642945
74.10813028 165.167138187782 18.1751004502194
74.13413028 159.080321382885 17.8370581309186
74.16013028 160.898178146393 17.9386832374282
74.18613028 164.635248243618 18.1458120922497
74.21213028 180.116665590594 18.2749171264976
74.23813028 187.971712438669 18.3372310478954
74.26413028 168.071939876406 18.3342270017803
74.29013028 184.386158772175 18.6188166355976
74.31613028 174.068769814866 18.4977874423618
74.34213028 160.7434642943 17.9300565695873
74.36813028 178.260456153845 18.5868424639245
74.39413028 178.875340558212 18.6675276371023
74.42013028 172.601634170249 18.6899198416011
74.44613028 184.897521686463 19.2316410449854
74.47213028 199.752929616744 19.467235115865
74.49813028 176.588447265692 18.9188145743281
74.52413028 164.255194736722 18.1248555711058
74.55013028 183.192225708595 18.5972454053412
74.57613028 183.227280980551 18.8331081149802
74.60213028 164.121009093519 18.1174506536388
74.62813028 192.552821705174 19.1433509183378
74.65413028 171.892560037398 18.7646969863892
74.68013028 171.151983626004 18.5014585168848
74.70613028 180.734065957952 19.0854016758849
74.73213028 186.991336227855 18.7256409488513
74.75813028 184.518724790393 18.9353204485988
74.78413028 177.886950051229 18.9837194296298
74.81013028 190.045408997734 18.857265770052
74.83613028 179.994746919086 18.9593319849827
74.86213028 166.277566244345 18.236094222412
74.88813028 159.07282680375 17.8366379569554
74.91413028 169.418892179421 18.4075469402863
74.94013028 169.365970961316 18.4046717417788
74.96613028 182.434743202658 19.1608201947346
74.99213028 183.764067537337 19.0635560457174
75.01813028 180.611535104334 19.1136378106311
75.04413028 183.418874616553 19.1448559098139
75.07013028 183.644886599119 18.7295768466095
75.09613028 194.880341245449 18.77327014936
75.12213028 197.076708377575 18.9740580566347
75.14813028 211.49450268091 19.3709917307819
75.17413028 236.538447320453 20.2509700152274
75.20013028 186.619099032983 19.2124770875757
75.22613028 218.889199548238 20.0018058302587
75.25213028 253.336717970632 20.8536140238321
75.27813028 254.063344461173 20.9018446970834
75.30413028 258.113370388185 21.1543085265325
75.33013028 289.603940517512 22.0220112042149
75.35613028 338.016679702324 23.291748544001
75.38213028 333.100366160662 23.6196715077368
75.40813028 367.367642111971 23.9790706898014
75.43413028 373.93579006597 24.0368213256433
75.46013028 382.727141144407 24.895313284897
75.48613028 460.901673987764 26.7138730534791
75.51213028 476.979310471648 27.0599081071705
75.53813028 572.503103566392 29.0965858417521
75.56413028 712.502306024767 32.0457395633896
75.59013028 1022.16561920271 36.8268944088629
75.61613028 1425.86739066633 42.1397113428385
75.64213028 1968.62744853957 48.3526514223121
75.66813028 2669.81377292891 55.1981700598636
75.69413028 2941.81190735811 57.9948433335869
75.72013028 2400.90615283063 53.5557093502897
75.74613028 1562.18593584982 45.6711432664907
75.77213028 980.301792580182 40.2638317383406
75.79813028 680.881854411123 39.3139392360175
75.82413028 539.1252421903 41.9252828854624
75.85013028 362.930025801906 45.2827460059775
75.87613028 246.91204802401 50.5010768545967
75.90213028 244.016149291443 55.0909385239054
75.92813028 173.12584532139 53.3212974546006
75.95413028 259.604692459792 47.4455075699838
75.98013028 263.868904153089 39.3031317808725
76.00613028 223.3980315662 32.5489224776919
76.03213028 160.885086631332 27.8058373689022
76.05813028 178.60228569763 25.1871361599021
76.08413028 223.494365892065 23.0647585809478
76.11013028 210.81725279898 21.3407947705912
76.13613028 216.385488878271 20.6788421126941
76.16213028 187.762867141718 19.9662933403439
76.18813028 141.066362765807 20.0377048166433
76.21413028 167.670196778094 18.3123017001192
76.24013028 165.941122119194 18.2176355282015
76.26613028 158.529350309351 17.8061422160642
76.29213028 166.190501879527 18.2313193093384
76.31813028 166.943179109586 18.2725575171942
76.34413028 162.580406835847 18.0322159944832
76.37013028 158.167889784981 17.7858308653254
76.39613028 162.013762980331 18.0007645937794
76.42213028 165.105643164418 18.171716658831
76.44813028 164.468610061273 18.1366264813098
76.47413028 165.702987097236 18.2045591595752
76.50013028 160.379687977849 17.9097564460184
76.52613028 164.091973582267 18.1158479559897
76.55213028 159.736818505456 17.8738254722069
76.57813028 162.784321203345 18.0435207874375
76.60413028 165.917959406741 18.2163640393324
76.63013028 156.664905524325 17.7011245701693
76.65613028 153.989432529165 17.5493266269202
76.68213028 151.898893314053 17.4297959433869
76.70813028 151.962583836042 17.4334496779061
76.73413028 152.509077724075 17.4647689778064
76.76013028 152.078599848177 17.4401032019984
76.78613028 152.986964899594 17.4921105015715
76.81213028 151.987159522797 17.4348593067336
76.83813028 153.665304304832 17.5308473443147
76.86413028 167.101810848761 18.2812368754831
76.89013028 173.228213891546 18.6133400490909
76.91613028 171.092862833942 18.4982627743224
76.94213028 165.826276170106 18.2113303286776
76.96813028 161.568147903668 17.9759922064774
76.99413028 165.304807361798 18.182673475691
77.02013028 165.643696252996 18.2013019453552
77.04613028 170.917582019097 18.4887848177806
77.07213028 167.48748153084 18.3023212479095
77.09813028 170.802587410694 18.4825640759443
77.12413028 174.781125693848 18.6965839496871
77.15013028 171.939834087016 18.543992778634
77.17613028 169.53480696662 18.4138429974093
77.20213028 169.210216636971 18.3962070349825
77.22813028 164.420968238344 18.1339994616932
77.25413028 177.49968985055 18.8414272203859
77.28013028 173.108038788579 18.6068825324706
77.30613028 171.85928800765 18.5396487565245
77.33213028 167.125876995819 18.2825532678463
77.35813028 167.269191094046 18.2903904329047
77.38413028 172.93965217625 18.5978306356548
77.41013028 194.201622269118 18.9964179529814
77.43613028 200.131164708051 19.1090000243994
77.46213028 193.401020009442 18.8601563226874
77.48813028 177.686475676047 18.8513381846513
77.51413028 192.36822496433 19.0091250488329
77.54013028 179.545374437455 18.9496899413924
77.56613028 195.781889330675 19.0435235219235
77.59213028 201.814362742966 19.2481153522467
77.61813028 190.381406043017 19.2343831171296
77.64413028 180.11538659143 19.3595172717261
77.67013028 211.13478714124 20.2246132811491
77.69613028 201.44179352642 19.7782715926481
77.72213028 203.966018592081 19.6285756935868
77.74813028 212.146101891817 20.0520572674309
77.77413028 236.216473087444 20.5374888791006
77.80013028 224.674168681102 20.5133005233114
77.82613028 223.160047656842 20.543347754709
77.85213028 246.217391772427 20.8316677903768
77.87813028 305.334055281991 22.1404844912879
77.90413028 381.955315426892 24.3011783548951
77.93013028 432.331683500735 25.1668872256301
77.95613028 604.185794473189 28.4369648957053
77.98213028 736.484681948564 30.848404686819
78.00813028 1004.27202556848 35.1811203679512
78.03413028 1163.39717290673 37.2413281626714
78.06013028 1024.89671234969 35.3632092988305
78.08613028 766.075335577986 31.9342987894684
78.11213028 522.584001204698 28.9376625110909
78.13813028 339.307201457126 26.9543073987854
78.16413028 284.541787664542 27.161308547535
78.19013028 260.733711110619 29.6532654360161
78.21613028 229.612071710554 31.5616383022212
78.24213028 198.898667827251 34.9002373672656
78.26813028 224.634841045261 36.976559957106
78.29413028 225.693065270782 34.8940256738085
78.32013028 152.403478820211 29.8204429569396
78.34613028 186.899062549667 26.2386865736832
78.37213028 188.950919102533 22.8352335217366
78.39813028 199.304256989693 21.9184185976691
78.42413028 156.018883056472 20.3189181396675
78.45013028 162.341273650906 19.706637734467
78.47613028 157.678293441357 17.7582822052899
78.50213028 170.717172575263 18.4779421243418
78.52813028 158.022358937833 19.425841137966
78.55413028 168.632067770806 18.3647525314558
78.58013028 169.449714874516 18.4092213238103
78.60613028 167.250026100755 18.2893425852738
78.63213028 162.863007239772 18.0478811631599
78.65813028 149.654403702645 17.3005435580877
78.68413028 154.088769392265 17.5549861516473
78.71013028 143.958687341809 16.9681282021211
78.73613028 139.632825724179 16.7112432645916
78.76213028 144.436389428559 16.9962577897935
78.78813028 151.540598225815 17.4092273364337
78.81413028 148.859650358608 17.2545443497421
78.84013028 141.44780104102 16.8195006490097
78.86613028 147.074871935547 17.1507942635638
78.89213028 137.591986176153 16.5886699994998
78.91813028 136.902214619434 16.5470368718653
78.94413028 130.314638272043 16.144016741322
78.97013028 149.993389170109 17.3201263950417
78.99613028 151.200457731974 17.3896784174966
79.02213028 132.453642912687 16.2759726537425
79.04813028 142.397476426371 16.875868951042
79.07413028 156.073533290899 17.667684245022
79.10013028 150.180418523691 17.3309214136866
79.12613028 141.574055424484 16.8270054034866
79.15213028 136.455754547388 16.5200335682097
79.17813028 129.408584980857 16.0877956837385
79.20413028 142.709824331113 16.89436736496
79.23013028 135.220571269914 16.4450947865869
79.25613028 130.846334446913 16.1769177810183
79.28213028 138.467358458637 16.6413556213811
79.30813028 130.419889012204 16.1505349144977
79.33413028 132.817578276474 16.2983175988489
79.36013028 142.099321826419 16.8581921822252
79.38613028 140.169392979377 16.7433206371602
79.41213028 141.472542131288 16.8209715611963
79.43813028 136.198714804407 16.5044669592451
79.46413028 141.596620084652 16.8283463290159
79.49013028 151.448747261336 17.4039505435597
79.51613028 139.341750415591 16.6938162452802
79.54213028 135.075650428024 16.4362800187891
79.56813028 131.70221092909 16.2297388105348
79.59413028 127.146117183401 15.9465430224485
79.62013028 128.578454248477 16.0361126367008
79.64613028 129.61214017548 16.1004434830522
79.67213028 137.442429101355 16.5796519324958
79.69813028 137.48317842936 16.5821095418743
79.72413028 139.197778118353 16.6851897273212
79.75013028 136.374827902291 16.5151341443108
79.77613028 130.162014661865 16.1345600908029
79.80213028 134.984689568977 16.430744935576
79.82813028 135.820104345182 16.4815111167139
79.85413028 122.324814172379 15.6412796261929
79.88013028 132.539197110112 16.281228277382
79.90613028 145.754013550368 17.0736061539657
79.93213028 144.867959859762 17.0216309359451
79.95813028 137.39355303687 16.5767037155684
79.98413028 147.583399041722 17.1804190310785
80.01013028 150.834262074166 17.3686074326162
80.03613028 126.294311896285 15.8930369593911
80.06213028 127.667646138437 15.9792143823429
80.08813028 137.631900896723 16.5910759685274
80.11413028 148.831664000138 17.2529223032006
80.14013028 144.625179924463 17.0073619309088
80.16613028 126.548497941625 15.9090224678718
80.19213028 135.28249832523 16.4488600410624
80.21813028 131.776580534871 16.2343204683702
80.24413028 143.6013471544 16.9470556235825
80.27013028 132.353632813886 16.2698268468897
80.29613028 126.413592245156 15.9005403835943
80.32213028 133.14795583348 16.3185756629358
80.34813028 139.116425797473 16.6803132942684
80.37413028 124.300552548384 15.7670893032534
80.40013028 124.222182899181 15.7621180619345
80.42613028 114.115923467705 15.1073441390408
80.45213028 120.779446091096 15.5421649773187
80.47813028 131.996855956728 16.2478833056326
80.50413028 137.668882704391 16.5933048368546
80.53013028 139.396271404368 16.6970818650666
80.55613028 127.582629229744 15.9738930276714
80.58213028 137.196490086176 16.5648115042807
80.60813028 126.260162393393 15.8908881056657
80.63413028 119.591573212725 15.4655470781169
80.66013028 113.562980121449 15.0706987310774
80.68613028 149.4174364194 17.2868410312237
80.71213028 131.872590590173 16.2402334090476
80.73813028 156.295436849288 17.6802396391728
80.76413028 124 15.7480157480236
80.79013028 124 15.7480157480236
80.81613028 131.852778402707 16.2390134184751
80.84213028 138.477833385045 16.6419850609863
80.86813028 117.508106932804 15.3302385456199
80.89413028 115.397559436542 15.1919425641714
80.92013028 149.24202601377 17.2766910034167
80.94613028 116.539195402598 15.2669050827335
80.97213028 129.367725747488 16.0852557174257
80.99813028 115.464312462208 15.1963359045664
81.02413028 130.239941274345 16.1393891628119
81.05013028 123.077033328959 15.6892978382692
81.07613028 130.82374374523 16.1755212432385
81.10213028 131.418365278635 16.2122401461757
81.12813028 133.633412771624 16.3482973285675
81.15413028 143.094479965624 16.9171203202924
81.18013028 140.734135713751 16.7770161657997
81.20613028 125.010267590941 15.8120376669764
81.23213028 129.679845777638 16.1046481350968
81.25813028 135.126952190107 16.4394009738863
81.28413028 144.029960338698 16.9723280865471
81.31013028 140.712841724746 16.7757468820167
81.33613028 149.775352649419 17.3075331950812
81.36213028 134.109166919661 16.3773726170996
81.38813028 132.228765363203 16.2621502491647
81.41413028 142.373948184875 16.8744746990758
81.44013028 139.385635106293 16.6964448375271
81.46613028 151.515106392113 17.4077630034483
81.49213028 146.536018961626 17.1193468895064
81.51813028 140.287681997882 16.750383995472
81.54413028 145.901882341835 17.0822646239798
81.57013028 150.054368297612 17.3236467464337
81.59613028 140.6357149976 16.7711487380918
81.62213028 153.973499474912 17.5484187022599
81.64813028 144.072316410297 16.9748234989526
81.67413028 146.4415762793 17.1138292780605
81.70013028 166.837090753953 17.8025976573261
81.72613028 153.313658800342 17.5107771843709
81.75213028 138.923525969447 16.6687447619458
81.77813028 149.004357745801 17.2629289372227
81.80413028 138.654394168374 16.6525910397376
81.83013028 139.081813572365 16.6782381307118
81.85613028 147.220392537233 17.1592769391506
81.88213028 141.302022491397 16.8108311806048
81.90813028 139.216203373038 16.6862939787742
81.93413028 134.377361180929 16.3937403408087
81.96013028 142.777071859799 16.8983473665207
81.98613028 144.368305584996 16.992251503847
82.01213028 135.649885438943 16.4711800086662
82.03813028 140.829328522704 16.7826892077941
82.06413028 147.684424188074 17.1862982743856
82.09013028 138.764694104734 16.659213313043
82.11613028 135.767722740142 16.4783326061918
82.14213028 138.927355960777 16.6689745311928
82.16813028 138.920990366485 16.6685926440408
82.19413028 135.915206934038 16.4872803660299
82.22013028 124.666666666667 15.790292376436
82.24613028 135.999318083803 16.4923811551761
82.27213028 143.851484014352 16.961809102472
82.29813028 133.27991125604 16.3266598700432
82.32413028 139.455419945459 16.7006239371743
82.35013028 141.032600344681 16.7947968338221
82.37613028 126.878372315107 15.9297440227461
82.40213028 127.075308616163 15.9421020330547
82.42813028 129.684529444853 16.1049389595151
82.45413028 140.429004754867 16.7588188578353
82.48013028 137.689529499219 16.5945490748751
82.50613028 135.353223028546 16.4531591512722
82.53213028 134.976986800549 16.4302761267454
82.55813028 134.025693666756 16.3722749590127
82.58413028 146.014055650302 17.0888300155571
82.61013028 130.832436136442 16.1760586136699
82.63613028 126.586417289104 15.9114058014434
82.66213028 136.329353828941 16.5123804358391
82.68813028 138.529128790955 16.6450670645062
82.71413028 131.809100193726 16.2363234873986
82.74013028 127.519450571792 15.9699374182739
82.76613028 125.640522136364 15.8518467149013
82.79213028 137.029995914483 16.5547573775325
82.81813028 133.824192284441 16.35996285353
82.84413028 131.399120453344 16.211053047433
82.87013028 150.418110508856 17.3446308988606
82.89613028 141.871442536805 16.844669337022
82.92213028 131.480722658469 16.2160860048576
82.94813028 127.791672625584 15.9869742368957
82.97413028 137.193490053556 16.5646303945217
83.00013028 137.728754239896 16.5969126189117
83.02613028 128.628469685896 16.039231258754
83.05213028 149.912529644742 17.3154572359347
83.07813028 127.376813741109 15.9610033356998
83.10413028 129.991923022084 16.1240145759103
83.13013028 111.546477380793 14.9362965544202
83.15613028 142.582544512066 16.8868318231731
83.18213028 129.206253023017 16.0752140280008
83.20813028 141.362603692136 16.8144344949294
83.23413028 115.372555749614 15.1902966231482
83.26013028 126.894875055789 15.9307799592982
83.28613028 131.203401649709 16.1989753780731
83.31213028 128.135600325026 16.0084727769407
83.33813028 132.692179893233 16.2906218354753
83.36413028 134.024567006247 16.372206143721
83.39013028 136.664774226029 16.5326812239291
83.41613028 129.411301024018 16.0879645091614
83.44213028 121.497767336548 15.5883140420347
83.46813028 129.735869960809 16.1081265180535
83.49413028 124.882127123015 15.8039316072308
83.52013028 152.523913574355 17.4656184301819
83.54613028 130.819337711295 16.1752488519525
83.57213028 124.994106662113 15.8110155690337
83.59813028 129.572863968578 16.0980038494577
83.62413028 140.313216617309 16.7519083460547
83.65013028 125.732164911611 15.8576268660611
83.67613028 118.659129301817 15.405137409437
83.70213028 127.389043453676 15.9617695418569
83.72813028 132.14786879147 16.2571749570133
83.75413028 138.402521590795 16.6374590362107
83.78013028 144.436069009559 16.9962389374566
83.80613028 149.255823716127 17.2774896160367
83.83213028 146.123813649252 17.0952516009126
83.85813028 155.181602152849 17.6171281514808
83.88413028 128.686240591536 16.0428327044532
83.91013028 128.940652187123 16.058683145708
83.93613028 145.430547556903 17.054650248944
83.96213028 140.482001156378 16.761980858859
83.98813028 141.598362158386 16.8284498488949
84.01413028 130.995618537026 16.1861433662887
84.04013028 116.315249036751 15.2522292820919
84.06613028 120.573981094825 15.5289395062782
84.09213028 121.870556463217 15.6122103792651
84.11813028 130.471904471374 16.1537552582286
84.14413028 137.320537966178 16.5722984504973
84.17013028 140.537657486169 16.7653009210195
84.19613028 129.343879411316 16.0837731525482
84.22213028 129.908733758639 16.118854410822
84.24813028 135.354085384942 16.4532115640043
84.27413028 147.698873116453 17.1871389775293
84.30013028 137.685091067602 16.5942816094944
84.32613028 141.74703083527 16.8372818967475
84.35213028 144.873673611211 17.021966608545
84.37813028 133.125604011199 16.3172058889504
84.40413028 128.557975181492 16.0348355265336
84.43013028 132.947725122321 16.3063009368968
84.45613028 138.888191366831 16.6666248152907
84.48213028 132.400837956203 16.2727279800409
84.50813028 129.054036020015 16.0657421876498
84.53413028 122.329981954586 15.6416100165287
84.56013028 118.281531565813 15.3806067218308
84.58613028 122.8381261707 15.6740630450882
84.61213028 126.443141944757 15.9023986835167
84.63813028 126.953959418309 15.9344883456174
84.66413028 131.130979982637 16.194504004917
84.69013028 137.341801881744 16.5735815007948
84.71613028 139.653173492867 16.7124608297442
84.74213028 145.17775712484 17.0398214265784
84.76813028 135.482129276603 16.4609920282225
84.79413028 129.221046087577 16.0761342422597
84.82013028 143.992804447009 16.9701387411541
84.84613028 149.183045200513 17.2732767708106
84.87213028 135.920198307907 16.4875831041367
84.89813028 126.837803427359 15.9271970809279
84.92413028 141.494416811562 16.8222719518834
84.95013028 138.088535161519 16.6185760618363
84.97613028 136.58707316379 16.5279807093178
85.00213028 142.105945368646 16.8585850751862
85.02813028 142.739688093538 16.896134948179
85.05413028 147.752557790349 17.1902622312953
85.08013028 136.997205595339 16.5527765402267
85.10613028 136.540012032135 16.5251331027702
85.13213028 147.974405233841 17.2031628041963
85.15813028 136.795460684943 16.5405840697929
85.18413028 143.580463804491 16.9458233086794
85.21013028 142.666666666667 16.8918126124266
85.23613028 140.701282923541 16.7750578492917
85.26213028 138.089158638505 16.6186135786657
85.28813028 138.933925712447 16.6693686570576
85.31413028 130.160433959725 16.1344621205496
85.34013028 140.211026056568 16.7458070009521
85.36613028 145.849346338131 17.0791888764151
85.39213028 143.647031741227 16.9497511333487
85.41813028 141.962448505898 16.8500711277964
85.44413028 132.092188744492 16.2537496439739
85.47013028 132.466083138807 16.2767369665303
85.49613028 141.608830728694 16.8290719131326
85.52213028 143.837021756802 16.9609564445406
85.54813028 156.097425353944 17.6690364963087
85.57413028 136.877570105435 16.5455474436741
85.60013028 146.2331847263 17.1016481501813
85.62613028 139.391499224569 16.6967960534091
85.65213028 154.154225705254 17.5587144008469
85.67813028 148.936981243131 17.2590255369839
85.70413028 182.350214740582 17.620661801119
85.73013028 159.278509286576 17.8481656921139
85.75613028 143.862993056844 16.9624876157269
85.78213028 161.333333333333 17.96292478041
85.80813028 159.956025089204 17.8860853788191
85.83413028 144.443247201536 16.9966612722344
85.86013028 159.508837990909 17.8610659251294
85.88613028 151.520334321048 17.4080633225553
85.91213028 154.989605759423 17.6062264985671
85.93813028 146.304930833346 17.1058429101489
85.96413028 157.355977825579 17.7401227631366
85.99013028 158.600763285039 17.8101523455045
86.01613028 149.360038015801 17.2835203599152
86.04213028 149.99147766096 17.3200160312258
86.06813028 163.030589318105 18.0571641914285
86.09413028 151.724870458013 17.4198088656571
86.12013028 145.588635651085 17.0639172320476
86.14613028 159.862085590395 17.8808325080459
86.17213028 194.901435834733 18.7311426801831
86.19813028 178.363735606716 17.9832355855083
86.22413028 165.388159704421 18.1872570611635
86.25013028 181.856419578874 18.1792372539466
86.27613028 152.177795024966 17.4457900379986
86.30213028 208.346577459684 18.755389216906
86.32813028 209.353523888605 19.1874636469639
86.35413028 202.093691378385 18.9352404001748
86.38013028 188.611590392647 18.1634242907263
86.40613028 175.183748684123 18.119967090558
86.43213028 183.62002081089 19.2011172943671
86.45813028 206.70444807027 19.7087276183695
86.48413028 187.268796634451 19.0353566355395
86.51013028 188.290211250102 19.1702718733788
86.53613028 216.331067479962 19.4219987560597
86.56213028 208.641057179682 20.0311419848793
86.58813028 204.289789801382 20.3072228599082
86.61413028 254.307524208595 21.3892836359251
86.64013028 268.890671950402 21.458874047366
86.66613028 277.608021675714 21.351411967809
86.69213028 268.26067518893 21.1783187767979
86.71813028 270.918572304017 21.6727796287729
86.74413028 296.381113912487 22.1067265172254
86.77013028 306.874450512747 22.2252810709757
86.79613028 300.555357325758 22.5175576545688
86.82213028 316.49048435452 22.9479368553493
86.84813028 299.445174113744 22.4540595922655
86.87413028 321.569433981652 23.6267949921334
86.90013028 358.692482925156 24.9289161543299
86.92613028 415.06420630358 26.2376556735963
86.95213028 490.253556892667 27.5763849746062
86.97813028 585.683137737901 29.2301193514258
87.00413028 685.826772776297 31.1742454128096
87.03013028 836.70355453247 33.7399043579408
87.05613028 1105.16796177896 37.5045550885514
87.08213028 1501.97316751287 42.55732178614
87.10813028 2168.74953805572 49.730378590143
87.13413028 3228.51172942395 59.4999104417295
87.16013028 4413.22684731745 68.9643693670517
87.18613028 5067.75550785193 73.885854577716
87.21213028 4533.53221873856 70.6549161310362
87.23813028 3293.1526768081 61.954518785954
87.26413028 2151.79890858942 52.8615181231658
87.29013028 1369.31704950788 46.2711693239355
87.31613028 894.712916530632 43.4139011465104
87.34213028 608.02949489335 44.0294990128865
87.36813028 461.786460700684 48.3841830493332
87.39413028 355.050423303916 55.8518221622816
87.42013028 295.27160259961 64.6543602526337
87.44613028 302.388219635388 71.1523277540285
87.47213028 322.975673746192 71.1955817071965
87.49813028 318.342229834557 64.3793688865133
87.52413028 256.417440260001 53.9301183852739
87.55013028 191.002468833374 43.6748884089578
87.57613028 204.965679526303 36.2243806720816
87.60213028 210.344878849358 30.7862473960408
87.62813028 221.081807707068 27.3653207986069
87.65413028 225.020239064805 25.073047278948
87.68013028 218.963360840038 23.2652397818044
87.70613028 179.420126003884 21.8390667780616
87.73213028 162.145599529218 21.762039800113
87.75813028 143.136143138954 21.4995072284764
87.78413028 138.117294542351 20.5902391691179
87.81013028 165.12498689039 18.1727811239991
87.83613028 160.691100050275 17.9271358588189
87.86213028 172.651572868432 18.5823342381108
87.88813028 139.172662818532 16.6836844143332
87.91413028 136.183108525331 16.5035213530526
87.94013028 149.085927553222 17.2676534337021
87.96613028 157.035602084826 17.7220541746619
87.99213028 163.569554521795 18.086987284885
88.01813028 153.979607121264 17.5487667442054
88.04413028 147.928533233752 17.2004961110866
88.07013028 151.848406473991 17.4268991202676
88.09613028 161.649212203248 17.9805012278995
88.12213028 171.270047094267 18.5078387227827
88.14813028 158.140067122508 17.7842664803757
88.17413028 137.768548667001 16.5993101463284
88.20013028 139.394436786131 16.696971988126
88.22613028 153.230837390276 17.506046806191
88.25213028 151.132569365209 17.3857740331116
88.27813028 138.964948533084 16.6712296207019
88.30413028 125.697487891174 15.8554399428823
88.33013028 167.549170323578 18.3056914823548
88.35613028 142.916803526621 16.9066142989435
88.38213028 142.034024560765 16.8543184116573
88.40813028 166.539010313744 18.2504252177172
88.43413028 149.823856828759 17.310335457683
88.46013028 139.247408958197 16.6881640067563
88.48613028 137.963652674153 16.6110597298398
88.51213028 138.492899434233 16.642890339976
88.53813028 163.148392514097 18.0636869168006
88.56413028 158.264043850939 17.7912362612012
88.59013028 168.172272718538 18.3396986190361
88.61613028 135.441342902301 16.4585140825228
88.64213028 157.223052465503 17.7326282578473
88.66813028 144.855844084476 17.0209191340818
88.69413028 167.419995122743 18.2986335622496
88.72013028 130.678146252614 16.1665176369318
88.74613028 134.428256335758 16.3968445949676
88.77213028 147.901927451888 17.1989492383627
88.79813028 134.946682325728 16.4284315943871
88.82413028 135.234041580279 16.4459138742898
88.85013028 137.774957047009 16.5996962048713
88.87613028 154.30235880084 17.5671488182255
88.90213028 151.222590360187 17.3909511160366
88.92813028 147.713859950389 17.1880109349738
88.95413028 146.749386851799 17.1318059089985
88.98013028 140.316018848717 16.7520756235588
89.00613028 142.186917123718 16.863387389473
89.03213028 163.538436832391 18.0852667568046
89.05813028 165.660872229383 18.2022455883544
89.08413028 140.544085551527 16.7656843314866
89.11013028 153.838081914401 17.5407002091935
89.13613028 146.171866111292 17.0980622358963
89.16213028 141.209222982269 16.8053100526155
89.18813028 143.813143022936 16.9595485212865
89.21413028 135.864102973164 16.4841804754233
89.24013028 128.732686309907 16.0457275503423
89.26613028 140.956673137141 16.790275348376
89.29213028 152.304679241582 17.4530615790802
89.31813028 138.943837308603 16.6699632458265
89.34413028 143.997251559145 16.9704007942738
89.37013028 151.346760857983 17.3980895996074
89.39613028 140.879320859756 16.7856677472036
89.42213028 146.692216322771 17.128468485114
89.44813028 147.208956353823 17.1586104538697
89.47413028 166.560847947661 18.251621733296
89.50013028 161.980531948723 17.9989184091002
89.52613028 133.622529530455 16.3476316040248
89.55213028 139.075243820778 16.6778442144528
89.57813028 159.905314406416 17.8832499510808
89.60413028 152.853693695902 17.484489909397
89.63013028 149.610187588109 17.2979876048117
89.65613028 139.290274569485 16.6907324326697
89.68213028 140.236195146946 16.7473099420143
89.70813028 134.903201917884 16.4257847251134
89.73413028 129.750671705888 16.1090453910769
89.76013028 138.062172290905 16.616989636568
89.78613028 142.294395760206 16.8697596758345
89.81213028 129.567694478865 16.0976827201225
89.83813028 135.849227752183 16.4832780569997
89.86413028 139.074784039782 16.6778166460591
89.89013028 122.762915601386 15.6692639011145
89.91613028 115.988273470957 15.2307763079205
89.94213028 115.333333333333 15.1877143331927
89.96813028 120.22283644953 15.5063107443086
89.99413028 127.249445409485 15.9530213696018
90.02013028 135.27533920178 16.44842480007
90.04613028 136.489798793499 16.5220942252185
90.07213028 133.594089130347 16.345891785421
90.09813028 128.62743789415 16.0391669293733
90.12413028 125.254997789277 15.8275075605275
90.15013028 151.209134469692 17.3901773694055
90.17613028 155.496550455938 17.6349964817654
90.20213028 140.926093353298 16.7884539701128
90.22813028 152.294060304522 17.4524531401475
90.25413028 145.855802152515 17.0795668652642
90.28013028 137.013645864958 16.5537697135703
90.30613028 138.932938413924 16.6693094286431
90.33213028 136.232339730907 16.5065041562959
90.35813028 125.90890784266 15.8687685623466
90.38413028 138.006279406038 16.6136256973629
90.41013028 131.328811037722 16.2067153388786
90.43613028 127.034578356758 15.9395469419151
90.46213028 138.861261134121 16.6650089189368
90.48813028 131.162017839951 16.1964204588514
90.51413028 134 16.3707055437449
90.54013028 134.3608798331 16.3927349660208
90.56613028 130.640056852958 16.1641613981646
90.59213028 121.68079835413 15.6000511764629
90.61813028 136.272619980535 16.5089442412611
90.64413028 137.637802061357 16.5914316477727
90.67013028 126.512258196889 15.9067443681534
90.69613028 133.059429352464 16.3131498707309
90.72213028 139.451418194451 16.7003843185988
90.74813028 128.950770264989 16.0593132023128
90.77413028 125.519740917429 15.8442255044182
90.80013028 121.676402708222 15.5997694026689
90.82613028 140.082432163825 16.7381260697741
90.85213028 128.586836608715 16.0366353459019
90.87813028 137.349952335635 16.5740732673435
90.90413028 125.948156300518 15.8712416842866
90.93013028 129.675132037063 16.1043554380213
90.95613028 127.184129075307 15.9489265516716
90.98213028 125.456101861665 15.8402084494911
91.00813028 122.016859589224 15.6215786391276
91.03413028 134.183424912483 16.381906171901
91.06013028 122.585043068684 15.6579081022136
91.08613028 137.130137311581 16.5608053736273
91.11213028 114.90773692586 15.1596660204544
91.13813028 131.786102884709 16.2349070144987
91.16413028 141.934950294267 16.8484391143077
91.19013028 140 16.7332005306815
91.21613028 140.076081606221 16.7377466587484
91.24213028 145.930131296913 17.0839182447653
91.26813028 120.848162708983 15.5465856514531
91.29413028 129.840524972945 16.1146222402479
91.32013028 129.351339268415 16.0842369584892
91.34613028 181.024679036605 17.3596101290714
91.37213028 127.051294552159 15.9405956320433
91.39813028 127.219781772598 15.9511618243059
91.42413028 119.866917916926 15.4833405902554
91.45013028 123.02685187121 15.6860990607104
91.47613028 129.423048945917 16.0886947230605
91.50213028 125.783503103239 15.8608639804545
91.52813028 130.695009873681 16.1675607234784
91.55413028 137.224603094286 16.5665085696586
91.58013028 121.689660797523 15.600619269601
91.60613028 133.730764649668 16.3542511078721
91.63213028 130.307176090678 16.1435545088854
91.65813028 134.960008625444 16.4292427473359
91.68413028 143.22868467737 16.9250515318193
91.71013028 145.216104472436 17.0420717327698
91.73613028 143.704864501189 16.9531628023321
91.76213028 131.000547439815 16.186447877148
91.78813028 138.591864412115 16.648835659716
91.81413028 147.086095281068 17.1514486432527
91.84013028 123.881218802802 15.7404713273016
91.86613028 121.254404385585 15.5726943324259
91.89213028 138.766947425745 16.6593485722429
91.91813028 132.58006502399 16.2837382086541
91.94413028 140.424363873369 16.7585419337942
91.97013028 138.383907215411 16.6363401753758
91.99613028 150.300229805121 17.3378331867117
92.02213028 144.718572837211 17.0128523673845
92.04813028 134.902109362654 16.4257182103343
92.07413028 145.457899433537 17.0562539517643
92.10013028 145.030325013989 17.0311670189678
92.12613028 144.661600109392 17.0095032325693
92.15213028 147.747940626044 17.1899936373486
92.17813028 146.514815192718 17.118108259543
92.20413028 143.214556167988 16.9242167421709
92.23013028 134.908610287087 16.4261139827463
92.25613028 130.25614095704 16.140392867402
92.28213028 129.596089152094 16.0994465216724
92.30813028 132.908997208996 16.3039257363983
92.33413028 134.551971084406 16.4043878937561
92.36013028 139.760993941137 16.7189110854228
92.38613028 135.69606917753 16.4739836820078
92.41213028 147.504323759061 17.1758157744581
92.43813028 139.418255990076 16.6983984854881
92.46413028 132.46769158999 16.2768357852495
92.49013028 139.156747125292 16.6827304195262
92.51613028 135.311245815167 16.4506076371159
92.54213028 132.640093282495 16.2874241844741
92.56813028 134.971582463254 16.4299471979221
92.59413028 142.25412589861 16.8673724034664
92.62013028 137.70330984057 16.595379467826
92.64613028 141.78544468576 16.8395632179555
92.67213028 141.679667661792 16.8332805870865
92.69813028 133.906931538098 16.3650194951364
92.72413028 145.916249730629 17.0831056737719
92.75013028 141.824329938917 16.8418722200898
92.77613028 142.567273688672 16.8859274953241
92.80213028 152.666666666667 17.4737898961082
92.82813028 146.836694127872 17.1369013609737
92.85413028 138 16.6132477258361
92.88013028 139.007076113284 16.6737563922042
92.90613028 143.36336249927 16.9330069685966
92.93213028 148.954157219517 17.2600206963675
92.95813028 156.000928859302 17.6635743188802
92.98413028 159.240712556881 17.8460478850014
93.01013028 145.343915840852 17.0495698386119
93.03613028 136.78928482817 16.5402106895994
93.06213028 134.483093094861 16.4001886022607
93.08813028 158.432196232514 17.8006851684149
93.11413028 148.601332971476 17.239566872255
93.14013028 155.924185022223 17.6592290331273
93.16613028 157.759116537183 17.7628329124148
93.19213028 179.982377702282 17.8417692397544
93.21813028 177.95181605304 18.012179505505
93.24413028 197.021405109741 18.7917958429349
93.27013028 170.490049579016 18.3169307041521
93.29613028 171.807084521633 18.2089580466387
93.32213028 161.880339085403 17.993350943357
93.34813028 154.783572784226 17.5945203278877
93.37413028 182.711573462717 17.9802232059917
93.40013028 174.789777204401 18.1004438889933
93.42613028 173.201150826932 17.9992134677821
93.45213028 190.167738457084 18.8028024519539
93.47813028 169.119971840914 18.4754129879816
93.50413028 193.797622589172 19.2877376017798
93.53013028 178.251353114154 19.046926699848
93.55613028 181.413228712762 19.1589526600146
93.58213028 189.197361488327 18.9549620401291
93.60813028 174.631371452526 18.6002044249159
93.63413028 182.305289689869 18.775132541649
93.66013028 223.654772936913 19.9044221036761
93.68613028 197.266121018947 19.3942034750106
93.71213028 210.495428784182 19.5905563486831
93.73813028 227.780318820552 20.1503409552656
93.76413028 263.561874214311 21.1049757117622
93.79013028 302.00983460855 21.8782626832717
93.81613028 308.292971646308 22.2673288327624
93.84213028 364.30965579102 23.2950420941796
93.86813028 407.546695463229 24.3007921920285
93.89413028 468.659521766242 25.5379190729591
93.92013028 619.074755206586 28.1991537617813
93.94613028 862.438936332311 32.5049625540331
93.97213028 1235.50157081864 38.0780215065463
93.99813028 1510.88073875421 41.3648229870504
94.02413028 1484.78056004047 41.2216751051328
94.05013028 1133.55409865447 37.0193291152658
94.07613028 774.504017219125 32.3656224618468
94.10213028 549.757913159819 29.1872773447436
94.12813028 452.648139333552 27.8305372188061
94.15413028 299.595609868293 25.9517395742181
94.18013028 284.247819267441 26.562985604587
94.20613028 272.683427709092 27.8811191092074
94.23213028 204.395529432657 29.6846541005786
94.25813028 224.488709628682 34.2615348062422
94.28413028 198.055067683741 38.6397497319787
94.31013028 192.885525306548 41.1039378403154
94.33613028 147.714704387386 39.2936116091655
94.36213028 141.735948584863 34.4789800515774
94.38813028 172.931511292912 29.9024124844898
94.41413028 166.141454486245 26.3104909942671
94.44013028 152.638707848976 23.8966107558331
94.46613028 156.762890877665 21.2518102876367
94.49213028 134.768752550332 20.3766397756811
94.51813028 135.668410685513 19.844291415334
94.54413028 154.283486014227 19.0084123099255
94.57013028 155.524106489964 17.6365589892112
94.59613028 137.953629465042 16.6104563131205
94.62213028 148.541012043003 17.2360675354329
94.64813028 141.545163923898 16.8252883436747
94.67413028 149.860307087058 17.3124410229787
94.70013028 148.713674007774 17.2460821062509
94.72613028 142.640650256499 16.8902723634937
94.75213028 149.734480703691 17.3051715220446
94.77813028 148.337839738441 17.2242758767062
94.80413028 133.752063287335 16.3555533863783
94.83013028 137.891359981044 16.6067070776264
94.85613028 137.348700732998 16.5739977514779
94.88213028 145.606073607328 17.0649391213287
94.90813028 146.893709641408 17.1402280989144
94.93413028 144.645974761788 17.0085845831914
94.96013028 138.993558368538 16.6729456526757
94.98613028 146.626852554216 17.1246519704323
95.01213028 140.583301611693 16.7680232354141
95.03813028 134.207699248767 16.3833878821669
95.06413028 137.941092045828 16.6097015051944
95.09013028 138.758023128126 16.6588128705575
95.11613028 138.601769652092 16.649430599999
95.14213028 133.903906080775 16.3648346206599
95.16813028 137.729551800902 16.5969606736235
95.19413028 142.028962652156 16.8540180759459
95.22013028 136.102351932406 16.4986273327453
95.24613028 128.552384047836 16.0344868360566
95.27213028 131.126973582969 16.1942566104758
95.29813028 126.596684026286 15.9120510322388
95.32413028 127.945100153012 15.9965683915652
95.35013028 146.92652367774 17.1421424377316
95.37613028 144.666666666667 17.0098010962308
95.40213028 138.023608073575 16.6146687041045
95.42813028 133.800072346753 16.3584884599252
95.45413028 137.379867564285 16.5758781103316
95.48013028 135.187576176564 16.4430882851467
95.50613028 141.834002655655 16.8424465358009
95.53213028 140.473188471709 16.7614550962444
95.55813028 129.316413597377 16.0820653895809
95.58413028 127.754993875891 15.984679782585
95.61013028 151.119376071384 17.3850151608438
95.63613028 151.812510865444 17.4248392167873
95.66213028 144.032465868301 16.9724757102964
95.68813028 128.899234272158 16.0561037784488
95.71413028 125.229964029035 15.8259258199345
95.74013028 142.282791848954 16.869071809021
95.76613028 136.894883736296 16.5465938329492
95.79213028 134.710284728918 16.4140357456
95.81813028 134.786147141075 16.4186568964136
95.84413028 130.155040627271 16.1341278430085
95.87013028 131.562580487202 16.221133159382
95.89613028 129.360005618107 16.0847757595875
95.92213028 139.201887450469 16.6854360117121
95.94813028 149.589197273896 17.2967741081333
95.97413028 122.846553640986 15.674600705663
96.00013028 142.092373833346 16.8577800337616
96.02613028 129.298411694139 16.0809459730539
96.05213028 136.224713853487 16.5060421575547
96.07813028 141.609935996349 16.8291375890952
96.10413028 145.881123934052 17.0810493784224
96.13013028 136.754434340547 16.5381035394356
96.15613028 108.764668063153 14.748875758047
96.18213028 117.447323282192 15.3262730813588
96.20813028 141.898665439487 16.8462853733093
96.23413028 129.283696137313 16.0800308542809
96.26013028 122.315644639164 15.640693375881
96.28613028 119.756331666781 15.4761966688706
96.31213028 132.032831397353 16.2500973164688
96.33813028 122.94674247246 15.6809911977821
96.36413028 117.179374256526 15.3087801118525
96.39013028 127.511338871849 15.9694294745835
96.41613028 132.244588512011 16.263123224769
96.44213028 140.495871717823 16.7628083397635
96.46813028 131.193713896284 16.1983773197369
96.49413028 114.692418772645 15.145456003214
96.52013028 136.414383449977 16.5175290797369
96.54613028 148.409990128407 17.2284642454519
96.57213028 127.35553075694 15.9596698435111
96.59813028 121.55324958232 15.5918728562235
96.62413028 116.905397416578 15.2908729258063
96.65013028 133.567246793404 16.3442495571626
96.67613028 128.473341162864 16.0295565230523
96.70213028 129.838153065977 16.1144750498412
96.72813028 137.879336750198 16.6059830633539
96.75413028 124.278955501454 15.7657194889072
96.78013028 117.330808735202 15.3186689196681
96.80613028 135.426930403464 16.457638372711
96.83213028 139.159286760108 16.6828826501962
96.85813028 126.153677411674 15.8841856833565
96.88413028 137.593927758609 16.5887870417706
96.91013028 117.048249409495 15.3002123782316
96.93613028 129.262184661754 16.0786930228644
96.96213028 134.85294295246 16.4227246796907
96.98813028 132.633562284697 16.2870231954582
97.01413028 137.333393480062 16.573074155392
97.04013028 139.193391152952 16.6849267995369
97.06613028 121.649606098149 15.5980515512771
97.09213028 126.936561923529 15.933396494378
97.11813028 130.506879901122 16.1559202709794
97.14413028 126.664546351457 15.9163152991801
97.17013028 119.903181378853 15.4856825086176
97.19613028 139.91658921815 16.7282150403533
97.22213028 140.31327273219 16.7519116958149
97.24813028 117.43349844762 15.3253710198233
97.27413028 113.0708591797 15.038009122201
97.30013028 125.259911655385 15.8278180211541
97.32613028 134.993571080893 16.4312854689396
97.35213028 133.307218022638 16.3283323105967
97.37813028 134.418452320715 16.3962466632284
97.40413028 131.224719355905 16.2002913156464
97.43013028 143.201719722637 16.9234582590342
97.45613028 142.915599358362 16.9065430741096
97.48213028 128.057475911341 16.0035918412925
97.50813028 124.445941851838 15.776307670164
97.53413028 131.213547476612 16.1996016911905
97.56013028 122.044994607007 15.6233795708231
97.58613028 118.374894405129 15.3866756906831
97.61213028 122.381197528422 15.6448839898813
97.63813028 128.285406667181 16.0178279842918
97.66413028 130.826827641768 16.1757118941806
97.69013028 126.803862730523 15.9250659484049
97.71613028 129.987737889735 16.1237550148677
97.74213028 131.185434468499 16.1978661846861
97.76813028 130.049050148574 16.1275571707915
97.79413028 131.665106503626 16.2274524496993
97.82013028 133.631283775909 16.3481671006819
97.84613028 131.496707178944 16.2170716949112
97.87213028 132.022498157261 16.2494614161369
97.89813028 130.597582812233 16.1615335171037
97.92413028 130.450937257546 16.1524572283938
97.95013028 118.231137886992 15.377329929932
97.97613028 105.006652145015 14.4918357805362
98.00213028 132.843930142243 16.2999343644226
98.02813028 142.072481813803 16.8566000020053
98.05413028 133.420945991722 16.335295895191
98.08013028 124.404536649224 15.7736829338759
98.10613028 123.488969688556 15.7155317879196
98.13213028 122.915566960668 15.6790029632415
98.15813028 117.518482958614 15.3309153646228
98.18413028 110.632721321157 14.8749938703286
98.21013028 121.934947969942 15.6163342670386
98.23613028 127.551183057662 15.9719243084647
98.26213028 121.688230462207 15.6005275848099
98.28813028 132.184222473492 16.2594109655604
98.31413028 137.078811832234 16.5577058696085
98.34013028 128.901184535192 16.0562252435118
98.36613028 137.211463590935 16.5657154141278
98.39213028 144.097874746915 16.9763290935888
98.41813028 130.238631849307 16.1393080303529
98.44413028 122.112416219719 15.6276944057477
98.47013028 114.621551766191 15.140776186589
98.49613028 127.856109242336 15.9910042988135
98.52213028 145.944948078671 17.0847855168668
98.54813028 126.761083307478 15.9223794269247
98.57413028 126.986276627294 15.9365163462593
98.60013028 134.442006603736 16.3976831658461
98.62613028 127.876782078699 15.9922970256745
98.65213028 127.683142512073 15.9801841361151
98.67813028 130.983156301212 16.1853734156004
98.70413028 138.816466652644 16.6623207658864
98.73013028 134.2583474605 16.3864790275702
98.75613028 124.81129251426 15.7994488836959
98.78213028 130.584701256821 16.1607364471314
98.80813028 133.205302770848 16.3220894968045
98.83413028 123.054485412987 15.6878606197905
98.86013028 132.445789160679 16.27549011002
98.88613028 137.6368448362 16.5913739537267
98.91213028 148.655907750802 17.2427322516359
98.93813028 167.207271745439 17.3100051544731
98.96413028 139.959397007051 16.7307738617824
98.99013028 128.30609857206 16.0191197368682
99.01613028 134.378726720775 16.393823637015
99.04213028 127.10117001076 15.9437241578472
99.06813028 143.23644588495 16.9255100889131
99.09413028 137.242024306254 16.5675601285315
99.12013028 122.720884597452 15.6665812861295
99.14613028 115.433205777659 15.194288780832
99.17213028 129.003755661659 16.0626122197891
99.19813028 128.044618073125 16.0027883865984
99.22413028 122.260315084552 15.6371554372624
99.25013028 125.786767439972 15.8610697898958
99.27613028 139.114773943758 16.6802142638371
99.30213028 136.29261090068 16.5101551113658
99.32813028 132.943583392505 16.3060469392496
99.35413028 124.201308229778 15.7607936494187
99.38013028 133.500244500296 16.3401496015365
99.40613028 135.258105403003 16.4473770190266
99.43213028 147.029810825628 17.1481667140034
99.45813028 145.775621602199 17.0748716892514
99.48413028 124.755943891112 15.7959452956202
99.51013028 139.412670595787 16.6980639953131
99.53613028 142.666666666667 16.8918126124266
99.56213028 129.976426648451 16.1230534731143
99.58813028 135.510353897662 16.462706575631
99.61413028 127.639976167119 15.9774826657468
99.64013028 140.758577777877 16.7784729804519
99.66613028 148.868987619668 17.2550854891923
99.69213028 135.995768050081 16.4921659008198
99.71813028 145.825630683448 17.0778002496486
99.74413028 153.538118737651 17.5235908841568
99.77013028 136.209931793764 16.5051465787956
99.79613028 133.937726484159 16.3669011412765
99.82213028 123.193309613366 15.6967072733975
99.84813028 137.826110149769 16.6027774875031
99.87413028 142.499105981195 16.8818900589475
99.90013028 128.292155151535 16.0182492895781
99.92613028 129.09464769347 16.0682698317815
99.95213028 139.240426243094 16.6877455783035
99.97813028 143.112578445139 16.918190118635
100.00413028 140.258254916073 16.7486271029045
100.03013028 129.147661456 16.0715687756983
100.05613028 127.834604739782 15.9896594547715
100.08213028 129.580547668412 16.0984811499975
100.10813028 141.718457429351 16.8355847792318
100.13413028 131.865761183051 16.2398128796517
100.16013028 133.454114552265 16.3373262532316
100.18613028 144.750950192929 17.0147553724953
100.21213028 147.825800735616 17.1945224263785
100.23813028 142.210692925214 16.8647972371573
100.26413028 141.437964628282 16.8189158169177
100.29013028 141.367865726287 16.8147474394525
100.31613028 132.548050872986 16.2817720702009
100.34213028 122.387081332045 15.6452600701967
100.36813028 129.09404328501 16.068232216707
100.39413028 148.515331088599 17.2345775166437
100.42013028 140.660376872601 16.7726191677151
100.44613028 128.248975477416 16.0155534076981
100.47213028 135.868960724318 16.4844751644885
100.49813028 127.102366115336 15.9437991780714
100.52413028 122.543323803236 15.6552434540786
100.55013028 129.728715486026 16.1076823588017
100.57613028 125.92087325111 15.8695225669274
100.60213028 132.12261351284 16.2556213977098
100.62813028 135.686310272537 16.4733912885318
100.65413028 132.58414428274 16.2839887179241
100.68013028 134.264091285317 16.3868295460298
100.70613028 133.970144918081 16.3688817527698
100.73213028 135.237757634315 16.4461398288057
100.75813028 128.060817755827 16.0038006583328
100.78413028 117.51829786976 15.3309032917021
100.81013028 123.225280361828 15.6987439218447
100.83613028 134.195226624946 16.3826265674919
100.86213028 129.56892872048 16.0977593919452
100.88813028 130.240848740791 16.1394453895288
100.91413028 136.390027574111 16.5160544667369
100.94013028 130.437180633385 16.1516055321683
100.96613028 143.776957068753 16.9574147244651
100.99213028 133.798238345405 16.3583763464107
101.01813028 118 15.3622914957372
101.04413028 124.638693020545 15.7885207046477
101.07013028 145.68655953997 17.0696549197674
101.09613028 148.46837583052 17.2318528214769
101.12213028 136.572196235302 16.5270805791768
101.14813028 142.742068681015 16.8962758429788
101.17413028 148.300462328274 17.2221056975199
101.20013028 139.029707893183 16.6751136663702
101.22613028 129.64450481884 16.1024535285055
101.25213028 140.429385320596 16.758841566206
101.27813028 144.296815101557 16.9880437426772
101.30413028 136.510933735175 16.5233733683637
101.33013028 126.587253603977 15.9114583620721
101.35613028 148.091711602484 17.2099803371465
101.38213028 127.327944032727 15.9579412226469
101.40813028 143.599439677082 16.9469430681219
101.43413028 137.585069963954 16.5882530704082
101.46013028 148.751696824063 17.3684049681648
101.48613028 152.465287585209 17.4559288537161
101.51213028 164.316889952263 17.8608447545355
101.53813028 143.068618571032 16.915591539821
101.56413028 130.866875984964 16.1781875366164
101.59013028 125.861098291881 15.865755468422
101.61613028 165.299237083806 17.5645267844812
101.64213028 142.699379478065 16.8937491089494
101.66813028 181.296743291934 17.4815044779446
101.69413028 147.669245909112 17.1854150900764
101.72013028 184.3010252239 18.1515557261632
101.74613028 160.635977951048 17.3112629912515
101.77213028 142.834885551152 16.9017682832982
101.79813028 162.320263540523 17.342283448018
101.82413028 157.020622782264 17.5208269558756
101.85013028 145.122040648317 17.0365513322572
101.87613028 162.277644032619 17.6997776702003
101.90213028 179.738710502831 17.7506172793226
101.92813028 199.157863081768 18.0161874058001
101.95413028 190.579351078021 18.3144928655417
101.98013028 159.927628049923 17.7085009498926
102.00613028 136.311565380417 16.5113031212208
102.03213028 136.360017476701 16.5142373409553
102.05813028 147.751067308303 17.1901755260557
102.08413028 130.876544669865 16.1787851626669
102.11013028 148.740833260749 17.3772224900496
102.13613028 147.971990802393 17.3837155357965
102.16213028 147.105613091052 17.1525865741032
102.18813028 153.085077782896 17.3240436096624
102.21413028 156.715829005603 17.4873833102592
102.24013028 132.109076699577 16.2547886297901
102.26613028 130.910431576156 16.1808795543478
102.29213028 126.237586728385 15.8894673748609
102.31813028 120.528739544716 15.5260258627065
102.34413028 132.609610074933 16.2855524975319
102.37013028 134.146610832657 16.3796587774384
102.39613028 140.296881604464 16.7509332041212
102.42213028 141.194322336588 16.8044233662799
102.44813028 124.689169472584 15.7917174159484
102.47413028 142.544252662553 16.8845641141578
102.50013028 136.930020537709 16.5487172033188
102.52613028 127.416412691339 15.9634841241715
102.55213028 123.711464326227 15.7296830436107
102.57813028 125.824312577901 15.8634367384814
102.60413028 125.999901099328 15.8745016362296
102.63013028 133.214859225969 16.3226749784445
102.65613028 127.845884200191 15.9903648613902
102.68213028 121.39276818822 15.5815768257401
102.70813028 116.068469057961 15.236040762479
102.73413028 130.612263647014 16.1624418728739
102.76013028 131.213627308686 16.1996066192168
102.78613028 137.408214803139 16.5775881721763
102.81213028 140.909739271933 16.787479815144
102.83813028 136.94838967751 16.5498271699441
102.86413028 124.18181646131 15.7595568758332
102.89013028 119.127233855233 15.4354937630925
102.91613028 127.778053655899 15.9861223350692
102.94213028 130.924547373184 16.1817519059701
102.96813028 132.111216083305 16.2549202448554
102.99413028 122.261347493123 15.6372214599093
103.02013028 114.042450323535 15.102479950229
103.04613028 120.318939049266 15.5125071506359
103.07213028 123.023770299 15.6859026070545
103.09813028 125.825540463346 15.8635141417875
103.12413028 130 16.1245154965971
103.15013028 137.028002248916 16.5546369485359
103.17613028 136.36481972986 16.5145281331233
103.20213028 127.087346883701 15.9428571394027
103.22813028 127.333288223283 15.9582761113651
103.25413028 124.666666666667 15.790292376436
103.28013028 135.021324916133 16.4329744669754
103.30613028 142.821344089218 16.9009670782011
103.33213028 131.481477433683 16.2161325496361
103.35813028 132.435191616477 16.2748389618132
103.38413028 131.888891497808 16.2412371140753
103.41013028 129.830667167347 16.1140104981564
103.43613028 135.968261157951 16.4904979402049
103.46213028 133.309544819563 16.328474810561
103.48813028 133.081959907424 16.3145309406936
103.51413028 139.916615259675 16.7282165970958
103.54013028 142.142918495812 16.8607780660213
103.56613028 134.404904502604 16.3954203668344
103.59213028 129.862253318239 16.115970545905
103.61813028 138.214346508188 16.6261448633283
103.64413028 135.333333333333 16.4519502390041
103.67013028 138.105622625316 16.6196042447054
103.69613028 144.166814590695 16.9803895473982
103.72213028 138.186551594746 16.6244730199033
103.74813028 132.984502772607 16.3085562066424
103.77413028 123.162413442366 15.6947388281785
103.80013028 129.476512101416 16.0920174062431
103.82613028 122.537999298033 15.6549033403616
103.85213028 133.936307153683 16.3668144214861
103.87813028 141.499618698982 16.8225811752526
103.90413028 147.921303575553 17.2000757891094
103.93013028 129.940780307332 16.1208424288144
103.95613028 124.576254101198 15.7845655056576
103.98213028 136.647789694681 16.5316538612857
104.00813028 142.572069585663 16.8862115103219
104.03413028 131.247787199525 16.2017151684336
104.06013028 150.222135464799 17.3333283280966
104.08613028 149.63993973759 17.2997074968099
104.11213028 129.822159864988 16.1134825450607
104.13813028 141.279132763564 16.8094695195038
104.16413028 139.810123921791 16.7218494145708
104.19013028 128.134045664409 16.0083756617846
104.21613028 121.855223168764 15.6112282136137
104.24213028 154.86261396169 17.5990121291901
104.26813028 129.046939367627 16.0653004558039
104.29413028 140.405461476687 16.7574139697441
104.32013028 128.808804345673 16.0504706688416
104.34613028 140.665384990665 16.7729177539667
104.37213028 140.00533318572 16.7335192464538
104.39813028 145.237748953806 17.0433417470757
104.42413028 142.740918303313 16.8962077581517
104.45013028 135.610288813044 16.4687758387224
104.47613028 186.369048552889 17.8513669157546
104.50213028 149.895706485069 17.3144856397797
104.52813028 148.666666666667 17.2433562085034
104.55413028 146.206548871068 17.1000905770155
104.58013028 128.355976971822 16.0222331135096
104.60613028 146.526057606773 17.1187650025796
104.63213028 137.953339119408 16.6104388334208
104.65813028 139.020946674729 16.674588251272
104.68413028 137.005512772156 16.5532783926421
104.71013028 145.29677084527 17.046804442198
104.73613028 146.666666666667 17.1269767715535
104.76213028 194.027626190918 18.5412947336917
104.78813028 155.336565889206 17.625922153987
104.81413028 140.00235919462 16.7333415189328
104.84013028 139.084531939936 16.6784011188085
104.86613028 130.227264493139 16.1386036876267
104.89213028 140.696869916614 16.7747947776784
104.91813028 129.894622610271 16.1179789434203
104.94413028 128.579032615418 16.0361487031904
104.97013028 150.719383110559 17.3619920003759
104.99613028 142.758606143733 16.8972545784061
105.02213028 129.56864705535 16.0977418947721
105.04813028 146.240549714645 17.1020788043235
105.07413028 135.954973612114 16.4896921506809
105.10013028 117.430399514395 15.325168809145
105.12613028 131.446766308122 16.2139918778888
105.15213028 141.64777147991 16.8313856518059
105.17813028 133.08493854719 16.3147135155473
105.20413028 133.612903631273 16.347042768114
105.23013028 136.443043044152 16.5192640903977
105.25613028 143.213089403132 16.9241300753175
105.28213028 135.491520328209 16.4615625217176
105.30813028 138.643699431094 16.6519488007317
105.33413028 137.75124604098 16.5982677434111
105.36013028 138.509656091015 16.6438971452611
105.38613028 138.106502342728 16.6196571771338
105.41213028 147.902170363148 17.1989633619674
105.43813028 130.25180607467 16.1401242916323
105.46413028 127.723880835169 15.9827332352867
105.49013028 135.564389063846 16.465988525676
105.51613028 147.107569710261 17.1527006451032
105.54213028 153.939025521177 17.5464540874318
105.56813028 142.50195332266 16.8820587205862
105.59413028 129.341735378911 16.0836398479269
105.62013028 137.08613806678 16.5581483304614
105.64613028 148.313973716925 17.2228902172037
105.67213028 154.270245749226 17.5653207058241
105.69813028 140.617614810574 16.7700694578511
105.72413028 116.095835971288 15.2378368524727
105.75013028 121.147153623809 15.5658057050581
105.77613028 130.853988073382 16.1773908942933
105.80213028 140.997117082756 16.7926839476455
105.82813028 133.588358634699 16.3455412045425
105.85413028 122.890980269072 15.6774347563032
105.88013028 143.22073434909 16.9245817879846
105.90613028 144.329760436191 16.9899829568008
105.93213028 132.182280890961 16.2592915522763
105.95813028 126.685083240845 15.9176055511402
105.98413028 135.014544650896 16.4325618605801
106.01013028 140.978388770082 16.7915686444169
106.03613028 143.142631328265 16.919966390526
106.06213028 136.596240989497 16.5285353851753
106.08813028 130.533007924178 16.1575374314391
106.11413028 141.637245087274 16.8307602375694
106.14013028 133.512758202327 16.3409154090172
106.16613028 131.030264867259 16.1882837180016
106.19213028 119.152108568066 15.4371052058387
106.21813028 119.750348962553 15.4758100894624
106.24413028 133.814936562969 16.3593970893165
106.27013028 133.690230483952 16.3517724105953
106.29613028 133.979331812312 16.3694429845558
106.32213028 138.278316370967 16.6299919645782
106.34813028 151.623589688062 17.4139937801793
106.37413028 134.549246360736 16.4042217956681
106.40013028 138.957415200076 16.6707777383106
106.42613028 139.306202975083 16.6916867317287
106.45213028 140.498858421271 16.7629865132244
106.47813028 148.593748789055 17.2391269378153
106.50413028 119.401707522533 15.4532655139639
106.53013028 134.133699203884 16.3788704863238
106.55613028 141.81316906446 16.8412095209614
106.58213028 128.549001125154 16.0342758567485
106.60813028 141.274896164991 16.8092174811912
106.63413028 151.616523109034 17.4135879765793
106.66013028 141.346836041395 16.8134967238463
106.68613028 151.551165696652 17.4098343298638
106.71213028 150.693496291258 17.3605009312092
106.73813028 129.160671368558 16.0723782539211
106.76413028 152.87261577794 17.4855720968998
106.79013028 132.969178158666 16.3076165124561
106.81613028 145.960463520832 17.0856936365389
106.84213028 143.950625400578 16.9676530728665
106.86813028 117.885775203567 15.3548542945589
106.89413028 131.865014471378 16.239766899274
106.92013028 149.267948171918 17.278191350481
106.94613028 145.980613488314 17.0868729431874
106.97213028 144.000458073476 16.9705897406941
106.99813028 147.299495568934 17.1638862481044
107.02413028 146.026764829202 17.0895737120153
107.05013028 138.239967315866 16.627685787016
107.07613028 131.599454713763 16.2234062214914
107.10213028 142.735247337579 16.8958721194012
107.12813028 138.318734891882 16.6324222464368
107.15413028 136.759580113079 16.5384146829785
107.18013028 139.121046993625 16.680590336893
107.20613028 144.796155313498 17.0174119838181
107.23213028 142.331506541847 16.8719593729861
107.25813028 150.906257448641 17.3727520818459
107.28413028 152.587135634855 17.4692378560059
107.31013028 146.861458935325 17.1383464158784
107.33613028 142.556564531522 16.8852932773773
107.36213028 144.836455248459 17.0197799779233
107.38813028 136.362514325796 16.5143885339904
107.41413028 141.315402581666 16.8116270825679
107.44013028 135.549862627792 16.4651062934797
107.46613028 135.081663205616 16.4366458382248
107.49213028 146.551884896158 17.1202736482895
107.51813028 138.781295746019 16.6602098273712
107.54413028 131.311116841199 16.2056235203215
107.57013028 126.399394908533 15.8996474746161
107.59613028 151.22895533767 17.3913171058244
107.62213028 156.326478738444 17.681995291168
107.64813028 133.574120219808 16.3446700927126
107.67413028 133.806603344628 16.3588876971894
107.70013028 147.255219307665 17.1613064367294
107.72613028 138.516892722215 16.6443319314543
107.75213028 138.950150819843 16.6703419772867
107.77813028 130.258455041612 16.1405362390233
107.80413028 138.978485346351 16.6720415874212
107.83013028 143.540439178482 16.9434612271804
107.85613028 135.6009278348 16.4682074212587
107.88213028 133.739975261083 16.3548142918887
107.90813028 150.088308994457 17.3256058476728
107.93413028 156.136082115695 17.6712241859864
107.96013028 138.060697462355 16.6169008820751
107.98613028 136.987756104507 16.5522056599419
108.01213028 143.872425186663 16.9630436647828
108.03813028 153.363368855443 17.5136157806116
108.06413028 151.170847885638 17.3879756087727
108.09013028 136.927685060279 16.5485760753171
108.11613028 138.926787981856 16.668940457141
108.14213028 142.751416946912 16.8968291076706
108.16813028 142.840048684703 16.9020737594357
108.19413028 142.177358344339 16.8628205436895
108.22013028 143.839006741868 16.9610734767507
108.24613028 143.224704319222 16.9248163546445
108.27213028 139.669104222789 16.7134140272291
108.29813028 141.974936166404 16.8508122158194
108.32413028 143.354917667974 16.9325082411304
108.35013028 135.71628797217 16.4752109529542
108.37613028 131.402425868277 16.2112569449921
108.40213028 138.965692303527 16.6712742346545
108.42813028 140.076434422921 16.737767737839
108.45413028 150.762809727787 17.3644930664725
108.48013028 158.685920172542 17.8149330715859
108.50613028 146.648178940917 17.1258972869112
108.53213028 149.715599699868 17.3040804262965
108.55813028 159.957689038456 17.8861784089534
108.58413028 188.575052965536 18.255744752267
108.61013028 154.592892788846 17.5836795232878
108.63613028 143.232062951386 16.9252511326353
108.66213028 146.624035902935 17.1244874903125
108.68813028 139.127926159459 16.6810027372133
108.71413028 148.646938343122 17.2422120589629
108.74013028 146.084251128561 17.0929372039191
108.76613028 154.812271132274 17.5961513480803
108.79213028 156.04796394945 17.6662369478873
108.81813028 182.397470555186 17.650012252883
108.84413028 143.339836582093 16.9316175589985
108.87013028 132.019919768579 16.2493027400303
108.89613028 140.342574871877 16.7536607863402
108.92213028 145.599478430954 17.0645526417163
108.94813028 138.468295998452 16.641411959233
108.97413028 146.671883590772 17.127281371588
109.00013028 155.483888094599 17.6342784425447
109.02613028 152.97726210957 17.4915557975596
109.05213028 142.274650075569 16.8685891571032
109.07813028 143.986884213843 16.9697898757671
109.10413028 148.155810439237 17.2137044496086
109.13013028 150.202409465597 17.3321902519905
109.15613028 133.213629016197 16.3225996101232
109.18213028 154.543179792587 17.5808520722169
109.20813028 160.077780894323 17.892891375869
109.23413028 134.607627414191 16.4077803138749
109.26013028 143.341915819105 16.9317403605834
109.28613028 145.977426659326 17.0866864347261
109.31213028 131.663136555241 16.2273310532103
109.33813028 139.806315323325 16.721621651223
109.36413028 138.347680183023 16.6341624485889
109.39013028 142.718645696292 16.8948895051901
109.41613028 150.886163596051 17.3715954129752
109.44213028 145.047687786742 17.0321864589806
109.46813028 151.459282334479 17.4045558595719
109.49413028 154.074617165696 17.5541799675004
109.52013028 155.287956453081 17.6231641003017
109.54613028 130 16.1245154965971
109.57213028 130.030166820413 16.1263862548565
109.59813028 133.990477650086 16.3701238633119
109.62413028 156.387801385303 17.6854630352333
109.65013028 133.200070810059 16.3217689488645
109.67613028 134.602371736221 16.4074599945403
109.70213028 132.750806182276 16.2942202134546
109.72813028 142.146746162802 16.8610050805284
109.75413028 156.425256303141 17.6875807448696
109.78013028 114.019042992303 15.100929970853
109.80613028 144.947666683027 17.0263129704012
109.83213028 131.65026197283 16.2265376450326
109.85813028 127.604276035452 15.9752481067088
109.88413028 139.179655921651 16.6841035672673
109.91013028 133.63825145433 16.3485933006072
109.93613028 136.14118510251 16.500980886148
109.96213028 125.789707325863 15.8612551411207
109.98813028 140.409843793418 16.7576754828
110.01413028 142.774091512523 16.8981709964435
110.04013028 138.245650993949 16.6280276036545
110.06613028 143.339466404388 16.931595695881
110.09213028 155.454611379616 17.6326181481716
110.11813028 186.468358964141 17.9191777320617
110.14413028 156.214974633834 17.6756880847017
110.17013028 137.452525786437 16.5802609018336
110.19613028 137.436835643439 16.5793145602247
110.22213028 145.755187645261 17.0736749204886
110.24813028 147.500291934679 17.1755810344034
110.27413028 150.784985758535 17.3657701101065
110.30013028 138.865084769265 16.6652383582873
110.32613028 136.399317400791 16.5166169296737
110.35213028 130.707852675213 16.1683550601299
110.37813028 130.799802540296 16.1740410868958
110.40413028 140.280340109908 16.7499456781154
110.43013028 140.826171767081 16.7825011108048
110.45613028 134.865441617804 16.4234857212349
110.48213028 134.867538215826 16.4236133792674
110.50813028 149.873902339456 17.3132262931815
110.53413028 157.760277919723 17.7628982950262
110.56013028 152.115383854643 17.442212236677
110.58613028 142.047228859511 16.8551018305741
110.61213028 142.885200014713 16.9047448969047
110.63813028 152.808247371591 17.4818904796701
110.66413028 147.486576388729 17.1747824666706
110.69013028 143.764709995171 16.9566924838054
110.71613028 142.193594456577 16.8637833511094
110.74213028 140.829436103818 16.7826956180357
110.76813028 140.5303566764 16.7648654439217
110.79413028 148.353232562804 17.2251695238569
110.82013028 150.333102280671 17.3397290798138
110.84613028 145.68089957907 17.0693233362703
110.87213028 140.885729239763 16.7860495197508
110.89813028 146.364432191134 17.1093209795792
110.92413028 152.406285079206 17.4588822711654
110.95013028 147.036679603442 17.1485672639694
110.97613028 136.879733823184 16.5456782165727
111.00213028 132.824208174876 16.298724377992
111.02813028 145.121457632724 17.0365171107668
111.05413028 149.565449221522 17.2954010778312
111.08013028 146.469235862591 17.1154454141627
111.10613028 154.057279817647 17.553192291868
111.13213028 158.580325296252 17.8090047614263
111.15813028 149.340939525422 17.282415312995
111.18413028 148.194456812975 17.2159493965901
111.21013028 149.962246055949 17.3183282135401
111.23613028 153.46471038896 17.5194012676781
111.26213028 150.035557828525 17.3225608862272
111.28813028 166.979128508684 18.2745248096186
111.31413028 167.486513917664 18.3022683795022
111.34013028 158.007105332896 17.7767885363412
111.36613028 151.034625791138 17.3801395731529
111.39213028 153.913458504056 17.544996922431
111.41813028 145.29254757586 17.0465566948789
111.44413028 148.116314421455 17.2114098447196
111.47013028 169.96976032051 18.4374488647703
111.49613028 155.341616792958 17.626208712764
111.52213028 157.396587791517 17.7424117747006
111.54813028 138.402282711382 16.6374446782781
111.57413028 157.067386036918 17.7238475527701
111.60013028 165.863432061798 18.2133704767568
111.62613028 154.280740360983 17.5659181576701
111.65213028 150.275165971523 17.3363875113314
111.67813028 163.825749269393 18.1011463321742
111.70413028 154.686954288622 17.5890280736954
111.73013028 152.735965683326 17.4777553297514
111.75613028 158.204875624498 17.7879102552547
111.78213028 169.542116456897 18.4142399493923
111.80813028 176.302140461006 18.4430413974448
111.83413028 161.326589497642 17.9625493456604
111.86013028 155.183254006556 17.6172219153053
111.88613028 142.577909986752 16.8865573748323
111.91213028 154.005825364321 17.5502607025834
111.93813028 184.697495393639 18.4088036625319
111.96413028 195.832168109486 17.9836121396604
111.99013028 179.35569609503 18.2338906137703
112.01613028 169.600820253686 18.4174276300295
112.04213028 165.315905765188 18.1832838489195
112.06813028 186.394194062534 18.3410951242699
112.09413028 168.204866943992 18.3414757827167
112.12013028 205.730923863657 18.8108264505059
112.14613028 203.865992821533 18.5997556011988
112.17213028 232.3458848145 19.6554634834263
112.19813028 180.777671154252 18.7916286166797
112.22413028 170.436689063551 18.5915273558787
112.25013028 163.458605066937 18.0808520300863
112.27613028 193.927673015629 18.7792033118608
112.30213028 245.368769973482 19.441088106929
112.32813028 231.517712057724 19.3743829350299
112.35413028 244.938026459667 20.4867047196584
112.38013028 205.563301385109 19.9228841078415
112.40613028 253.197908766061 20.8698646133019
112.43213028 291.153586296261 21.4859015173605
112.45813028 288.244492315009 21.3367483939854
112.48413028 317.975204521113 22.3050864205462
112.51013028 338.69009723524 22.6251979453503
112.53613028 366.498337338638 23.6509300330273
112.56213028 415.113500932692 24.8582389076141
112.58813028 448.512165699431 25.8790534425625
112.61413028 631.838432697956 28.7810462248085
112.64013028 815.944126209266 31.4410189903665
112.66613028 928.340346193461 33.0462811532089
112.69213028 1175.02937721088 36.8241865416154
112.71813028 1418.12734786267 40.5303770864314
112.74413028 1659.65623087747 43.5256085324023
112.77013028 1792.30190119907 45.0570464895378
112.79613028 1776.19113565092 44.6703353877131
112.82213028 1593.24386252334 42.7251677742417
112.84813028 1265.81355095368 39.2326409761917
112.87413028 978.379962572411 35.5737606585213
112.90013028 716.255708942246 31.9233497254042
112.92613028 618.569449909869 30.7505629226858
112.95213028 497.429453431801 29.133481502065
112.97813028 424.53745998169 28.5406574503031
113.00413028 392.880147851459 28.6802975687236
113.03013028 291.423911921145 28.86657870101
113.05613028 224.411757880503 30.7735358549347
113.08213028 222.638275175323 33.0085830627891
113.10813028 243.92726803342 35.9051710705924
113.13413028 209.420010260451 38.6723157475996
113.16013028 223.178889434062 41.8050345574066
113.18613028 196.881373853438 43.6653036469657
113.21213028 206.085659085532 44.4536256131736
113.23813028 161.805753918148 42.8790837748508
113.26413028 171.980158687341 40.0375797019291
113.29013028 202.802231334775 36.4643829487579
113.31613028 216.822646344079 32.7423409604719
113.34213028 212.980120147066 29.6859903607461
113.36813028 157.471666683889 26.8281340774737
113.39413028 137.870551701328 24.5152138024463
113.42013028 151.986453280908 23.667904772734
113.44613028 160.676428003442 22.5817564184003
113.47213028 172.089405373294 20.8563922903557
113.49813028 173.418130826983 19.8822434200599
113.52413028 168.617053114139 19.9340769656059
113.55013028 174.831654079858 20.1034128396246
113.57613028 176.507295122357 19.7258065855741
113.60213028 162.811507101467 19.3643809007582
113.62813028 161.183187503656 17.9545641831628
113.65413028 163.922659818138 18.1064993755357
113.68013028 176.569035916882 18.4479986805153
113.70613028 158.872168092482 17.8253846013197
113.73213028 162.813483981039 18.0451369615771
113.75813028 163.980596127297 18.1096988449448
113.78413028 152.856821285434 18.6531372729027
113.81013028 161.853610685739 17.9918654222256
113.83613028 158.103238005993 17.7821954778364
113.86213028 151.407393524949 17.4015742692981
113.88813028 159.154607124745 17.8412223305885
113.91413028 164.12364824574 18.1175963221251
113.94013028 156.768351719551 17.706967652286
113.96613028 164.342719555491 18.2481761260373
113.99213028 156.138443634637 17.67135782189
114.01813028 143.090479922139 16.9168838692082
114.04413028 155.929098888339 17.6595072914472
114.07013028 153.054646784569 17.495979354387
114.09613028 152.126248027288 17.4428350922256
114.12213028 145.887250648933 17.0814080595795
114.14813028 143.56730926446 16.945047020558
114.17413028 146.324693878919 17.1069982100261
114.20013028 143.10340658759 16.9176479799995
114.22613028 147.277958668674 17.1626314222892
114.25213028 145.472701178616 17.0571217489127
114.27813028 155.051191002886 17.609724075231
114.30413028 151.176417626442 17.3882959272289
114.33013028 139.360792791092 16.6949568906956
114.35613028 135.333174286001 16.4519405716165
114.38213028 131.396344263448 16.2108817936254
114.40813028 142.737292469375 16.8959931622485
114.43413028 147.465450127564 17.173552348164
114.46013028 136.460648728163 16.5203298228675
114.48613028 153.83474471859 17.5405099537379
114.51213028 141.961564756641 16.850018679909
114.53813028 130.555002897902 16.1588986566475
114.56413028 156.887999921802 17.7137234889676
114.59013028 173.673794003751 17.7522958721473
114.61613028 146.220311851401 17.1008954064634
114.64213028 149.539002486989 17.2938718907588
114.66813028 168.48025574116 17.6425604528026
114.69413028 148.455266400544 17.2310920373924
114.72013028 143.779492671722 16.9575642514909
114.74613028 124.59409866461 15.7856959722789
114.77213028 141.553725016803 16.8257971589344
114.79813028 123.035171760307 15.6866294506058
114.82413028 150.593258317899 17.354726060523
114.85013028 128.151496949751 16.0094657593407
114.87613028 179.511295256044 18.0673618171802
114.90213028 164.898570978877 17.4402568784414
114.92813028 147.64923824477 17.1842508271248
114.95413028 147.969084760476 17.2028535284398
114.98013028 153.662229088798 17.5306719260157
115.00613028 131.589218666771 16.222775266074
115.03213028 164.578879276347 18.3380574838229
115.05813028 197.021849720718 18.5486398766186
115.08413028 170.558611722124 17.9167094904475
115.11013028 166.724574505762 18.2151786400076
115.13613028 165.035833298438 17.9113770888581
115.16213028 216.768521405163 18.9249399946549
115.18813028 254.628551032329 19.2268864427355
115.21413028 275.51894644321 20.3960328747894
115.24013028 295.575869404723 20.5335044548412
115.26613028 288.438600741669 21.0929929913728
115.29213028 309.222082445257 21.0147897829961
115.31813028 311.068865607042 21.8810099482209
115.34413028 225.657148924148 19.8007392445321
115.37013028 220.705191409468 19.2143752898376
115.39613028 218.256842899128 19.2214352160875
115.42213028 195.097064620019 18.9710806336945
115.44813028 183.979342640899 17.6500374211847
115.47413028 178.738616754411 18.1647535692271
115.50013028 153.531569427454 18.4558972332558
115.52613028 151.318864401058 18.0922018715105
115.55213028 163.549737560012 18.1620540774467
115.57813028 201.593504214825 19.1223103977597
115.60413028 175.848358627665 19.3860117559507
115.63013028 133.895884500227 19.3664866274301
115.65613028 163.637124311521 20.7452261841157
115.68213028 148.624549820387 20.8641130725754
115.70813028 132.891627073215 20.521040153747
115.73413028 121.599415940765 20.5235758817391
115.76013028 117.080806878244 20.6105654834085
115.78613028 139.515110614648 19.8251063396766
115.81213028 147.71929724231 19.1901443191378
115.83813028 129.125008976895 18.6108547954794
115.86413028 142.4402454614 16.8784030916079
115.89013028 144.22137836518 16.9836025839738
115.91613028 147.876086133239 18.0859896153283
115.94213028 144.294172534287 16.9878881874285
115.96813028 145.199749774252 17.0411120396676
115.99413028 148.796723292416 17.250896979138
116.02013028 142.36454209658 16.8739172746923
116.04613028 145.888011780396 17.08145261858
116.07213028 165.728686349859 17.8089615876276
116.09813028 170.745123008864 17.8718371645138
116.12413028 145.190853842471 17.0405900040152
116.15013028 140.968285728902 16.7909669601784
116.17613028 150.564901781708 17.3530920461864
116.20213028 152.757238279473 17.4789724114132
116.22813028 142.564463393503 16.8857610662655
116.25413028 134.248358356603 16.3858694219503
116.28013028 136.825300730178 16.5423880216961
116.30613028 148.003582431396 17.2048587574206
116.33213028 144.315993424015 16.989172635771
116.35813028 129.739957900068 16.1083802972284
116.38413028 132.412183919518 16.273425203043
116.41013028 130.231631773186 16.1388742961327
116.43613028 131.612015850169 16.224180463134
116.46213028 127.164821778878 15.9477159354484
116.48813028 137.441943278921 16.5796226301397
116.51413028 132.827106982559 16.2989022319026
116.54013028 137.09278997486 16.5585500557785
116.56613028 132.081786677166 16.2531096518276
116.59213028 139.819469863355 16.7224083112065
116.61813028 124.866788089207 15.8029609940167
116.64413028 114.182106190132 15.111724335107
116.67013028 134.59751166066 16.4071637805356
116.69613028 136.770222767328 16.5390581816093
116.72213028 134.575968404225 16.4058506883505
116.74813028 129.200453083316 16.0748532237975
116.77413028 144.196888866679 16.9821605731826
116.80013028 143.510838012656 16.9417140816776
116.82613028 132.724148934183 16.2925841372192
116.85213028 128.208067102149 16.012998913517
116.87813028 130.907964800428 16.1807271035901
116.90413028 144.743268817427 17.0143039127333
116.93013028 138.935824509256 16.66948256601
116.95613028 133.529002995001 16.3419094964451
116.98213028 133.578147395579 16.3449164816207
117.00813028 153.057388869342 17.4961360802517
117.03413028 139.0929166245 16.6789038383522
117.06013028 140.133961800486 16.741204365307
117.08613028 134.079995461462 16.3755913152144
117.11213028 138.406512953782 16.6376989366788
117.13813028 135.38501798548 16.455091490811
117.16413028 127.175810893649 15.9484049919513
117.19013028 136.265426751875 16.5085085184504
117.21613028 134.293645016767 16.3886329519437
117.24213028 149.003715200277 17.2628917160641
117.26813028 131.975206826691 16.2465508232788
117.29413028 167.365253227033 17.3475182889669
117.32013028 126.666666666667 15.9164485150844
117.34613028 126.802587410696 15.9249858656575
117.37213028 130.2674007321 16.14109046701
117.39813028 138.750393218848 16.6583548538772
117.42413028 142.740062303094 16.896157095807
117.45013028 149.32246280451 17.2813461746769
117.47613028 139.421685730327 16.6986038775897
117.50213028 137.370848397895 16.5753339874583
117.52813028 162.934116731594 17.475767606214
117.55413028 119.492615207832 15.4591471438648
117.58013028 130.052024139675 16.1277415740503
117.60613028 134.432879856237 16.3971265687765
117.63213028 119.139483253142 15.4362873290919
117.65813028 124.759197223018 15.796151254215
117.68413028 138.706200821429 16.6557017757541
117.71013028 130.380115977959 16.1480720817043
117.73613028 152.523821029934 17.4656131315184
117.76213028 152.393268193657 17.4581366814249
117.78813028 142.11623117436 16.8591951868622
117.81413028 149.288416234067 17.2793759282022
117.84013028 148.393992895578 17.2275356853833
117.86613028 138.453589122132 16.640528184053
117.89213028 127.787647157388 15.9867224381602
117.91813028 128.741619288046 16.0462842607281
117.94413028 152.08511116063 17.4404765508647
117.97013028 135.394473832491 16.4556661264436
117.99613028 136.341751269349 16.5131312154509
118.02213028 151.046610268124 17.380829109575
118.04813028 142.815927039579 16.9006465580213
118.07413028 142.385141457029 16.875138011704
118.10013028 136.807075601033 16.5412862620192
118.12613028 136.64828652203 16.5316839143524
118.15213028 143.687604660888 16.9521446820683
118.17813028 144.071299038406 16.9747635646807
118.20413028 151.893420149532 17.4294819285905
118.23013028 139.858131273767 16.7247201037128
118.25613028 145.81626102469 17.0772515953059
118.28213028 140.396154288991 16.7568585533799
118.30813028 137.578837992301 16.5878773803221
118.33413028 132.914347755726 16.3042539084575
118.36013028 145.255492292293 17.0443827868476
118.38613028 147.323744480434 17.1652989767399
118.41213028 146.958490394363 17.1440071391937
118.43813028 143.674347188413 16.9513626112129
118.46413028 136.163137290533 16.5023111890749
118.49013028 145.417240325699 17.0538699611378
118.51613028 136.297505698269 16.5104515806364
118.54213028 134.016278897953 16.3716999055048
118.56813028 145.645046756239 17.0672227826462
118.59413028 148.580658427611 17.2383675809289
118.62013028 140.605548177189 16.76934990852
118.64613028 135.029774396086 16.4334886372971
118.67213028 148.880062305867 17.2557272988343
118.69813028 147.021424433545 17.1476776522971
118.72413028 121.622667184926 15.5963243865294
118.75013028 117.749540396713 15.3459793038251
118.77613028 131.940601574653 16.2444206775528
118.80213028 133.148721613601 16.3186225897654
118.82813028 138.771325710653 16.6596113826615
118.85413028 140.740623925835 16.7774028935252
118.88013028 133.279794994422 16.3266527490739
118.90613028 134.139531541282 16.379226571562
118.93213028 129.623677583821 16.1011600565811
118.95813028 135.958317164103 16.4898949156205
118.98413028 135.409449661584 16.4565761725569
119.01013028 130.095824966455 16.130457214007
119.03613028 134.986188731529 16.4308361766241
119.06213028 134.022351822281 16.372070841667
119.08813028 144.416011586505 16.995058786983
119.11413028 145.708281529004 17.0709274223168
119.14013028 150.803494877139 17.3668359166049
119.16613028 143.818573401759 16.9598687142182
119.19213028 124.230115866442 15.7626213471264
119.21813028 131.221938517347 16.2001196611227
119.24413028 140.101306811485 16.7392536758056
119.27013028 133.547787422634 16.34305891947
119.29613028 132.745668473433 16.2939049017376
119.32213028 146.102334571391 17.0939951194208
119.34813028 145.982645907761 17.0869918890225
119.37413028 129.687409184015 16.1051177694554
119.40013028 123.84716355186 15.7383076314996
119.42613028 128.132585255725 16.0082844337377
119.45213028 136.0344786024 16.4945129423333
119.47813028 132.637110610891 16.2872410561698
119.50413028 132.489336071365 16.2781655029899
119.53013028 146.45542777221 17.1146386331824
119.55613028 137.736824861635 16.5973988842611
119.58213028 136.541693959205 16.5252348823976
119.60813028 139.550735372214 16.7063302596479
119.63413028 151.08330870315 17.3829404131263
119.66013028 130.241022824805 16.1394561757703
119.68613028 147.264554861208 17.1618504166193
119.71213028 135.057638136765 16.4351840961253
119.73813028 134.527302853225 16.4028840667259
119.76413028 144.397377525774 16.993962311702
119.79013028 154.235019344526 17.5633151394904
119.81613028 129.582811994201 16.0986218040055
119.84213028 136.352925472984 16.5138078875215
119.86813028 120.481936360981 15.5230110713728
119.89413028 133.544056331914 16.3428306196885
119.92013028 129.087411062271 16.0678194576782
119.94613028 155.812195095114 17.6528861716782
119.97213028 127.544986898713 15.9715363630875
119.99813028 165.196333363173 18.1767067073864
120.02413028 137.624398253901 16.590623752825
120.05013028 118.177155894465 15.3738190372116
120.07613028 137.978710042841 16.6119661715789
120.10213028 133.384605022052 16.333071053666
120.12813028 153.567878950892 17.5252890960972
120.15413028 130.739953014473 16.170340318897
120.18013028 128.081507336368 16.0050933978136
120.20613028 141.290536549277 16.8101479201866
120.23213028 133.232250364578 16.323740402529
120.25813028 130.807707758525 16.1745298391345
120.28413028 143.540466927519 16.9434628649234
120.31013028 151.943745617929 17.4323690655016
120.33613028 159.264558893058 17.8473840600273
120.36213028 164.74554817997 18.1518896085212
120.38813028 133.071506990684 16.3138902160511
120.41413028 137.366123652481 16.5750489382373
120.44013028 141.533411353332 16.8245898228357
120.46613028 137.466127395104 16.5810812310358
120.49213028 139.467262736123 16.7013330447676
120.51813028 137.232478239149 16.566983928232
120.54413028 136.666666666593 16.5327956901785
120.57013028 130.183371121933 16.1358836833892
120.59613028 131.3349655017 16.2070950821978
120.62213028 132 16.2480768092719
120.64813028 139.806450653466 16.7216297443441
120.67413028 133.778957090502 16.3571976261523
120.70013028 148.070943897375 17.208773570326
120.72613028 141.319282331701 16.8118578587675
120.75213028 155.610245410501 17.6414424246149
120.77813028 150.790818095933 17.3661059593642
120.80413028 143.782221427237 16.9577251674414
120.83013028 140.296036609081 16.7508827593701
120.85613028 148.216045179457 17.2172033257122
120.88213028 142.782074238495 16.8986433916155
120.90813028 142.300918077499 16.8701462991581
120.93413028 132.808335884176 16.2977505125202
120.96013028 142.770142935259 16.897937325914
120.98613028 142.846803525228 16.9024734003771
121.01213028 139.094488646137 16.6789980901814
121.03813028 146.493854335062 17.116883731279
121.06413028 142.374821546107 16.8745264553473
121.09013028 138.965242910561 16.6712472785068
121.11613028 129.564574152772 16.0974888819823
121.14213028 134.114349121739 16.3776890385511
121.16813028 141.611867190856 16.8292523417326
121.19413028 135.610564121994 16.4687925557397
121.22013028 151.578099961214 17.4113813329795
121.24613028 156.652974837823 17.7004505500749
121.27213028 141.489879479334 16.822002227995
121.29813028 133.869648996772 16.362741151578
121.32413028 132.696887277634 16.2909107957556
121.35013028 126.496757791418 15.9057698833736
121.37613028 133.743770530375 16.3550463484745
121.40213028 145.690338065064 17.0698762775284
121.42813028 134.340474242018 16.3914901239648
121.45413028 124.315369330212 15.7680290036651
121.48013028 130.533001567992 16.1575370380508
121.50613028 140.05258979426 16.7363430769246
121.53213028 143.037808588285 16.9137700462248
121.55813028 146.422495149927 17.1127142879163
121.58413028 142.864482685135 16.9035193190729
121.61013028 128.025171414708 16.0015731360831
121.63613028 133.288749365413 16.3272011909827
121.66213028 138.289333851589 16.6306544580536
121.68813028 127.682538103614 15.980146313699
121.71413028 140.149522352695 16.7421338157772
121.74013028 151.516785994854 17.407859489027
121.76613028 145.6577027614 17.0679643051771
121.79213028 131.440641917573 16.2136141509272
121.81813028 140.895896459522 16.786655203436
121.84413028 145.153641835895 17.0384061364844
121.87013028 143.676252341401 16.9514750002117
121.89613028 144.898333161885 17.0234152367781
121.92213028 132.855373298649 16.3006363862672
121.94813028 125.489872506353 15.8423402631274
121.97413028 142.70470227569 16.8940641809892
122.00013028 132.411884893375 16.2734068279125
122.02613028 132.585744053404 16.2840869595691
122.05213028 144.04126987247 16.9729944248191
122.07813028 138.469837946719 16.6415046162731
122.10413028 142.699960169334 16.8937834820584
122.13013028 155.15442436021 17.6155853924989
122.15613028 164.204841519287 18.1220772274752
122.18213028 149.590691787801 17.2968605121161
122.20813028 131.137433472688 16.1949024987919
122.23413028 141.4153826071 16.817573107146
122.26013028 142.527468256736 16.883570016838
122.28613028 158.785493590722 17.8205215182229
122.31213028 141.43041222675 16.818466768808
122.33813028 141.909535968304 16.8469306384459
122.36413028 141.668730013233 16.8326308112091
122.39013028 142.841485376193 16.9021587601225
122.41613028 134.211858339598 16.3836417404433
122.44213028 136.384027508871 16.5156911759012
122.46813028 140.746066400179 16.7777272835256
122.49413028 147.701944300644 17.187317667434
122.52013028 135.735040002109 16.476349110292
122.54613028 132.225270827566 16.2619353600711
122.57213028 136.309302762065 16.5111660861409
122.59813028 142.59372042321 16.8874936223947
122.62413028 140.401158375203 16.7571571798562
122.65013028 130.744266503971 16.1706070698642
122.67613028 135.431691578343 16.457927668959
122.70213028 149.952831287145 17.3177845746588
122.72813028 151.315815545093 17.3963108471361
122.75413028 127.886788543613 15.9929227187286
122.78013028 131.846079677064 16.2386009050696
122.80613028 135.8283791243 16.4820131734142
122.83213028 160.626484700838 17.9235311644128
122.85813028 143.254996081759 16.9266060438446
122.88413028 140.76356279556 16.7787700857697
122.91013028 164.519212546131 18.139416338247
122.93613028 143.072100394312 16.9157973737162
122.96213028 135.281300513152 16.448787220531
122.98813028 145.910090618051 17.0827451317434
123.01413028 177.551429866297 17.9548838815955
123.04013028 152.555979808404 17.4674542969721
123.06613028 143.137025157924 16.9196350526791
123.09213028 134.085804081674 16.3759460234622
123.11813028 143.28167875455 16.9281823451043
123.14413028 149.197823228403 17.2741322924425
123.17013028 146.727269260267 17.1305148352446
123.19613028 163.242888370164 18.0689174202642
123.22213028 144.979866539781 17.0282040473904
123.24813028 137.756501718956 16.5985843805402
123.27413028 143.561281450188 16.9446912896157
123.30013028 141.234286815866 16.8068014098975
123.32613028 139.494234047037 16.7029478863485
123.35213028 133.343520238435 16.3305554246287
123.37813028 134.781086939976 16.4183486952845
123.40413028 135.999999999926 16.4924225024662
123.43013028 132.644854457453 16.2877165040071
123.45613028 130.387950044619 16.1485572138578
123.48213028 133.728614261087 16.3541196192939
123.50813028 131.657637966016 16.2269922022546
123.53413028 135.887011769521 16.4855701611755
123.56013028 151.607400393377 17.4130640838065
123.58613028 144.3718625917 16.992460833658
123.61213028 151.622414976339 17.413926322133
123.63813028 154.216681985617 17.5622710368344
123.66413028 154.691515338042 17.5892873839756
123.69013028 156.253508777799 17.6778680149954
123.71613028 149.088768538513 17.2678179593435
123.74213028 141.067313177837 16.7968635868627
123.76813028 133.946907022214 16.3674620526345
123.79413028 134.533651086499 16.4032710814946
123.82013028 131.632079629397 16.2254170750337
123.84613028 135.923113859783 16.487759936376
123.87213028 140.465543525746 16.7609989872767
123.89813028 127.499257818597 15.9686729454014
123.92413028 143.107313469855 16.9178789137323
123.95013028 184.756425400864 17.493954256379
123.97613028 159.276844720512 17.8480724292856
124.00213028 159.00312350417 17.832729656683
124.02813028 153.808545543971 17.5390162520006
124.05413028 146.641099649546 17.1254839143042
124.08013028 151.414487853006 17.4019819476407
124.10613028 154.770719594678 17.5937897904163
124.13213028 147.018523301451 17.1475084663313
124.15813028 142.274237112217 16.8685646758826
124.18413028 135.075930385647 16.436297051687
124.21013028 133.024535462293 16.3110107266406
124.23613028 146.709050487297 17.1294512747663
124.26213028 146.817356758074 17.1357729185511
124.28813028 143.820373297963 16.9599748406631
124.31413028 125.455987924378 15.8402012565736
124.34013028 131.492573512817 16.2168167969437
124.36613028 148.425495182547 17.2293641892292
124.39213028 146.358103643208 17.1089510866802
124.41813028 149.031877350284 17.2645230081971
124.44413028 155.352135121906 17.6268054463596
124.47013028 151.367800930893 17.3992988899492
124.49613028 158.504723156375 17.8047590916797
124.52213028 152.758532667828 17.4790464652868
124.54813028 157.938522337649 17.7729301094473
124.57413028 145.120997851733 17.0364901227766
124.60013028 134.964102920876 16.4294919532453
124.62613028 151.050137201458 17.3810320292817
124.65213028 153.831591994812 17.5403302132435
124.67813028 153.495126476801 17.521137319067
124.70413028 154.46553484524 17.57643506774
124.73013028 151.245970559187 17.3922954528255
124.75613028 138.357329182578 16.6347425097341
124.78213028 154.977341324829 17.6055298883521
124.80813028 162.290226281347 18.0161164672827
124.83413028 146.808391382162 17.135249714093
124.86013028 159.795289779012 17.8770965080469
124.88613028 163.415365246081 18.0784604015984
124.91213028 176.836822434015 18.282309566195
124.93813028 175.157576576377 18.0544884331995
124.96413028 159.38101561765 17.8539080101613
124.99013028 172.623767820066 18.2825116928718
125.01613028 144.713265076194 17.0125403791552
125.04213028 157.968448571141 17.7746138394701
125.06813028 135.042087972575 16.4342379179915
125.09413028 140.848925547943 16.7838568599678
125.12013028 166.640286435042 18.2559736215323
125.14613028 223.57670304108 18.6131623626269
125.17213028 182.223641162937 18.0969992064634
125.19813028 157.227088938547 17.7328558860973
125.22413028 174.896920739584 18.2322968339335
125.25013028 162.845594708311 18.0469163409327
125.27613028 172.571974258312 18.343187963854
125.30213028 148 17.2046505340853
125.32813028 148 17.2046505340853
125.35413028 167.037728756209 18.2777311916008
125.38013028 183.985654532879 18.2115725538487
125.40613028 167.907863014229 18.5014308594841
125.43213028 164.270340617989 18.1256911933305
125.45813028 205.871766839616 19.5097495354434
125.48413028 172.90549758182 18.6052897879818
125.51013028 195.64238570363 18.9001328330035
125.53613028 235.428755499181 20.1190113579579
125.56213028 226.388743994905 19.3060441459069
125.58813028 226.96460059164 19.6655640105985
125.61413028 247.914037503706 19.5965489762111
125.64013028 293.454894380348 20.6906160997651
125.66613028 330.923122102893 22.4386144661551
125.69213028 388.551480348403 24.5313401507692
125.71813028 462.723435100541 25.5162836304208
125.74413028 553.880160385522 26.7745253744587
125.77013028 665.831297957778 28.9024781814403
125.79613028 774.046491894893 30.6010434377727
125.82213028 936.889339872451 33.2345344254137
125.84813028 856.945191024124 31.8028571825373
125.87413028 713.123817935117 29.2745094771981
125.90013028 629.240562923007 28.0759052070669
125.92613028 506.324272803769 26.1407906149953
125.95213028 415.029894396047 24.2049281342008
125.97813028 363.460917497635 22.8773845546746
126.00413028 315.723444814861 22.4399352307399
126.03013028 276.032984657909 21.4056274668618
126.05613028 239.180286222336 20.6004272979543
126.08213028 233.108057145057 21.2382622242942
126.10813028 227.390468834022 21.3187353509165
126.13413028 218.814933343616 21.0432488628777
126.16013028 196.905929817543 20.8173856844834
126.18613028 161.510954177547 20.795912170077
126.21213028 161.85175810482 21.7423595344708
126.23813028 145.935698727519 22.4591175781012
126.26413028 158.025124836656 24.11616377706
126.29013028 173.453655339448 26.0437524480102
126.31613028 163.035844282261 27.7025323041436
126.34213028 174.772890633118 29.774650588434
126.36813028 121.709251017866 31.0748190913336
126.39413028 112.093899485365 31.6169910038648
126.42013028 134.887624872122 30.2468186103598
126.44613028 129.546621257957 28.2170123743458
126.47213028 144.081240539564 26.679279919042
126.49813028 153.034650542795 24.7847957382624
126.52413028 143.852540195287 23.0753759204728
126.55013028 128.832167601154 21.6489903519336
126.57613028 133.425250607485 20.7323858344125
126.60213028 142.403018630193 20.028931525004
126.62813028 148.963039373279 19.5702697536599
126.65413028 142.760553825128 19.261156366139
126.68013028 143.999170796663 19.1227238321667
126.70613028 151.999138745768 18.9983764000063
126.73213028 155.411713987444 17.6301851372834
126.75813028 152.094896107145 17.4410375899569
126.78413028 149.398858473554 17.2857663106704
126.81013028 148.673530795821 17.2437542777564
126.83613028 162.255192412391 18.0141717773752
126.86213028 157.723485849571 17.7608268866949
126.88813028 141.064786255377 16.7967131460519
126.91413028 150.194536028238 17.3317359793091
126.94013028 155.169895309145 17.6164636240731
126.96613028 145.478111872085 17.0574389561907
126.99213028 147.76026288296 17.1907104497144
127.01813028 155.958856777161 17.6611923027389
127.04413028 187.126796292991 18.1909804641934
127.07013028 164.104836069149 18.1165579550393
127.09613028 146.559332040906 17.1207086325833
127.12213028 151.380011574937 17.4000006652262
127.14813028 149.199808213467 17.274247202901
127.17413028 142.690939295434 16.8932494976801
127.20013028 129.091514655037 16.0680748476622
127.22613028 134.866348467426 16.4235409377775
127.25213028 162.181053005521 18.0100556915031
127.27813028 149.663596953051 17.3010749349889
127.30413028 146.911689534967 17.1412770548152
127.33013028 152.616304768726 17.470907519
127.35613028 145.204547995568 17.0413936047242
127.38213028 139.408244876512 16.6977989493533
127.40813028 154.398868007821 17.5726416914373
127.43413028 153.206048865632 17.5046307510688
127.46013028 150.373944153034 17.3420843126214
127.48613028 140.570273721299 16.7672462689196
127.51213028 144.837491688876 17.0198408740432
127.53813028 150.85181629195 17.3696180897537
127.56413028 142.174029212216 16.8626231181401
127.59013028 151.771309820212 17.422474555597
127.61613028 153.451960131849 17.5186734732884
127.64213028 145.559053553867 17.0621835386839
127.66813028 153.615176637643 17.5279877132341
127.69413028 162.122271700895 18.0067915910022
127.72013028 164.096627176113 18.1161048338826
127.74613028 184.745159926402 18.120938582607
127.77213028 150.371621387953 17.3419503740469
127.79813028 156.554822457711 17.6949044901469
127.82413028 166.273805080266 18.2358879729102
127.85013028 156.711379608559 17.7037498631538
127.87613028 138.326300005765 16.6328770815975
127.90213028 152.592714056162 17.4695571813462
127.92813028 146.697106471697 17.1287539810517
127.95413028 159.238090765662 17.8459009728095
127.98013028 182.493066194409 18.0817257926464
128.00613028 175.498112136678 18.075419711455
128.03213028 150.004481834164 17.3207668325721
128.05813028 151.238916692523 17.3918898738765
128.08413028 143.790378237232 16.9582061691225
128.11013028 150.796910088785 17.3664567536838
128.13613028 157.486832012335 17.7474974017373
128.16213028 159.217470012357 17.8447454457808
128.18813028 137.657008132848 16.5925891971596
128.21413028 137.119849181545 16.5601841282967
128.24013028 150.877813016693 17.3711147032476
128.26613028 154.995768903846 17.6065765499058
128.29213028 155.908994030907 17.6583687825862
128.31813028 140.63576243198 16.7711515664238
128.34413028 144.18674071545 16.9815629855117
128.37013028 154.226391131898 17.5628238692927
128.39613028 151.057188743794 17.3814377278633
128.42213028 163.02207333525 18.0566925728523
128.44813028 139.737395164885 16.7174995238454
128.47413028 140.214969985177 16.746042516677
128.50013028 138.863549177166 16.6651462146101
128.52613028 139.032253884168 16.675266347748
128.55213028 134.747724610063 16.4163165545784
128.57813028 137.85940830111 16.6047829435443
128.60413028 139.829615690254 16.7230150206387
128.63013028 155.669359846411 17.6447929909314
128.65613028 139.112912193306 16.680102649163
128.68213028 150.200615308747 17.3320867358058
128.70813028 150.013010529366 17.3212592226643
128.73413028 144.350626425088 16.9912110471907
128.76013028 151.552010692043 17.4098828653178
128.78613028 150.383571759565 17.3426394622943
128.81213028 146.669909610544 17.1271661176357
128.83813028 153.424726224331 17.5171188398281
128.86413028 148.300524799429 17.2221093249015
128.89013028 132.74536138361 16.2938860548127
128.91613028 142.092115268589 16.8577646957471
128.94213028 155.846514033347 17.6548301624992
128.96813028 151.400529395801 17.4011798103347
128.99413028 147.460785528877 17.1732807307676
129.02013028 144.095554306164 16.9761924062002
129.04613028 142.484822456322 16.8810439520974
129.07213028 143.333333333333 16.9312334656004
129.09813028 149.633533065083 17.2993371586938
129.12413028 154.302681544167 17.567167190197
129.15013028 149.354186609883 17.2831818025433
129.17613028 144.982577934276 17.028363276268
129.20213028 143.978385591993 16.9692890594741
129.22813028 145.358487387025 17.0504244748936
129.25413028 138.067830544289 16.6173301432143
129.28013028 150.07019951008 17.3245605722096
129.30613028 173.497641227606 17.8006770630518
129.33213028 152.711200875871 17.4763383393588
129.35813028 152.30445136701 17.4530485226513
129.38413028 149.688301613776 17.3025028024142
129.41013028 149.203438079251 17.2744573332566
129.43613028 156.464007933648 17.6897715041008
129.46213028 153.160884823264 17.5020504412063
129.48813028 141.30978137464 16.8112927149961
129.51413028 139.598095530017 16.7091648821847
129.54013028 143.097768019556 16.9173146816837
129.56613028 143.220883008412 16.9245905716157
129.59213028 138.762179894623 16.659062392261
129.61813028 144.904969416467 17.023805063291
129.64413028 147.650212214117 17.1843075050534
129.67013028 154.250730263576 17.5642096470964
129.69613028 147.525300270188 17.1770370128371
129.72213028 128.268002816228 16.0167414174187
129.74813028 136.205228441195 16.5048616135486
129.77413028 142.029233312439 16.8540341350336
129.80013028 152.938678206896 17.4893497996293
129.82613028 144.402837977942 16.9942836258515
129.85213028 133.690871321953 16.3518116012846
129.87813028 139.314828246576 16.6922034642869
129.90413028 151.673431041456 17.4168556887548
129.93013028 150.57375957643 17.3536024834286
129.95613028 157.123595308945 17.7270186612947
129.98213028 157.355414495318 17.7400910085218
130.00813028 153.362065786586 17.513541377265
130.03413028 155.735070075474 17.6485166558254
130.06013028 151.646264253668 17.4152958202649
130.08613028 141.647547637187 16.8313723526745
130.11213028 153.306166545532 17.5103493137934
130.13813028 144.499394002497 16.9999643530507
130.16413028 150.865447973982 17.3704028723563
130.19013028 149.866156785449 17.3127789095482
130.21613028 137.95908061974 16.6107844859742
130.24213028 147.382581283113 17.1687262942312
130.26813028 150.259936843175 17.3355090403008
130.29413028 132.788789708321 16.2965511509841
130.32013028 151.164179233367 17.3875920836306
130.34613028 142.40123355862 16.8760915829833
130.37213028 138.915087494336 16.6682385088728
130.39813028 133.373190231501 16.3323721627632
130.42413028 135.030503129837 16.4335329816712
130.45013028 154.480276443588 17.5772737615131
130.47613028 150.280172382067 17.3366762894199
130.50213028 159.185961369217 17.8429796485462
130.52813028 151.979652231312 17.4344287105321
130.55413028 149.99832272159 17.3204112377039
130.58013028 143.397804672131 16.9350408722348
130.60613028 164.902287478516 18.1605224307296
130.63213028 145.27664924365 17.0456240275122
130.65813028 163.237540147758 18.068621427644
130.68413028 188.409275582122 18.2238834578011
130.71013028 145.778464911829 17.0750382085563
130.73613028 148.964242899686 17.2606050241402
130.76213028 137.055023318533 16.5562691037886
130.78813028 139.643803834111 16.7119001812547
130.81413028 151.413029768657 17.4018981590318
130.84013028 152.07259575109 17.4397589290156
130.86613028 154.349824215422 17.5698505523196
130.89213028 155.247507858801 17.6208687560405
130.91813028 150.739522690028 17.3631519425494
130.94413028 158.514172030386 17.8052897775007
130.97013028 163.926976248801 18.1067377651968
130.99613028 160.231612704666 17.9014866815394
131.02213028 164.263235285097 18.125299185674
131.04813028 153.969140875369 17.5481703248726
131.07413028 156.144167774117 17.6716817408031
131.10013028 159.972944825165 17.887031325805
131.12613028 160.666666666667 17.925772879665
131.15213028 158.093203792047 17.7816311845706
131.17813028 150.220245348488 17.3332192825504
131.20413028 153.014628514817 17.4936919210793
131.23013028 155.161514656428 17.6159878892118
131.25613028 159.727431485695 17.8733002820237
131.28213028 148.32964014273 17.2237998213362
131.30813028 140.958316310344 16.7903732126683
131.33413028 137.658057285618 16.5926524272413
131.36013028 136.204892985511 16.5048412888771
131.38613028 144.648017569261 17.008704687263
131.41213028 144.629771047247 17.0076318779098
131.43813028 142.224737570674 16.8656299953885
131.46413028 147.659085045533 17.1848238306672
131.49013028 154.953660392169 17.6041847520508
131.51613028 157.333333333333 17.7388462608668
131.54213028 156.502394035117 17.6919413313021
131.56813028 156 17.6635217326557
131.59413028 160.022399256664 17.889795932691
131.62013028 162.666666666667 18.0369990112916
131.64613028 157.220523835363 17.7324856596791
131.67213028 146.450217204286 17.1143341795283
131.69813028 138.702869981865 16.6555017926129
131.72413028 145.895807093175 17.0819089737169
131.75013028 151.883130311975 17.4288915489181
131.77613028 159.565064007118 17.8642136130936
131.80213028 154.408455153134 17.5731872551984
131.82813028 137.868780284206 16.6053473486227
131.85413028 150.137898756084 17.3284678351021
131.88013028 154.805514584234 17.5957673651497
131.90613028 150.092483121959 17.3258467684532
131.93213028 158 17.7763888346312
131.95813028 159.238527446285 17.8459254423123
131.98413028 165.514938664261 18.1942264833799
132.01013028 159.477247808178 17.8592971758789
132.03613028 147.854326707148 17.1961813614039
132.06213028 155.398068976239 17.6294111629538
132.08813028 158.340654682205 17.7955418395847
132.11413028 153.300573087557 17.5100298736214
132.14013028 146.963382867621 17.1442925119482
132.16613028 145.130324107953 17.0370375422462
132.19213028 151.501373485138 17.4069740900099
132.21813028 152.950634934844 17.4900334439271
132.24413028 150.781306134047 17.3655582193056
132.27013028 159.515399062076 17.8614332606359
132.29613028 162.477022494874 18.0264817696008
132.32213028 164.202738565105 18.1219611833325
132.34813028 149.401982831484 17.2859470571608
132.37413028 154.314362963161 17.5678321350792
132.40013028 151.014103938436 17.3789587684899
132.42613028 148.666666666667 17.2433562085034
132.45213028 147.379020244567 17.1685188787249
132.47813028 149.497373441644 17.2914645673317
132.50413028 161.764430654373 17.9869080530464
132.53013028 151.52817939255 17.4085139740617
132.55613028 148.519840671788 17.2348391737079
132.58213028 158.77891919039 17.8201525914
132.60813028 167.731123822534 18.3156285080547
132.63413028 168.081245356581 18.3347345416606
132.66013028 146.774669879465 17.1332816400983
132.68613028 154.159655467244 17.5590236327219
132.71213028 158.664051848436 17.8137055015758
132.73813028 149.222147323393 17.2755403575919
132.76413028 150.653518482815 17.3581979757586
132.79013028 158.492601024904 17.8040782420716
132.81613028 143.552804221193 16.9441909940365
132.84213028 155.19731772055 17.6180201907337
132.86813028 168.624893610676 18.3643618789587
132.89413028 172.117887059912 18.5535919465699
132.92013028 161.870236044216 17.9927894471211
132.94613028 160.608399550495 17.922522118859
132.97213028 159.6900864733 17.8712107297351
132.99813028 156.405336534563 17.6864545081575
133.02413028 161.654197220931 17.9807784715196
133.05013028 156.477115039303 17.6905124312047
133.07613028 165.420565425816 18.1890387555701
133.10213028 150.610932829135 17.3557444570456
133.12813028 148.606851246051 17.2398869628574
133.15413028 145.493780005403 17.0583574827944
133.18013028 165.295334153758 18.1821524662928
133.20613028 148.863704192665 17.2547792911219
133.23213028 151.927518186196 17.4314381613335
133.25813028 162.328887074951 18.0182622400137
133.28413028 163.30560724713 18.0723881790498
133.31013028 178.509150583145 18.8949279217014
133.33613028 160.562007622692 17.9199334609642
133.36213028 159.952429328634 17.885884340934
133.38813028 174.699547205898 18.6922201573755
133.41413028 169.335471009558 18.4030144818483
133.44013028 157.880141284191 17.7696449758677
133.46613028 155.481393569835 17.6341369831265
133.49213028 162.365593573676 18.0202993079292
133.51813028 172.603842532913 18.5797654739188
133.54413028 176.863959816265 18.8076558781931
133.57013028 215.293328078576 19.5256462504086
133.59613028 159.580374201243 17.8650706240554
133.62213028 153.545122845693 17.5239905755335
133.64813028 162.194987745537 18.0108293948689
133.67413028 168.317741237181 18.3476287970506
133.70013028 157.071969096016 17.7241061323845
133.72613028 176.112493110655 18.7676579844506
133.75213028 172.642284749278 18.581834395413
133.77813028 177.698873116457 18.8519958156402
133.80413028 158.214336120181 17.7884420970574
133.83013028 169.834387253229 18.4301051138201
133.85613028 166.131727547985 18.2280952130487
133.88213028 168.508251797217 18.3580092492197
133.90813028 168.745931070033 18.370951585045
133.93413028 176.050673636441 18.7643637588084
133.96013028 167.659478940429 18.3117164100162
133.98613028 176.016506772533 18.7625428325978
134.01213028 174.740408763618 18.6944060490628
134.03813028 178.487086782183 18.8937601753692
134.06413028 181.559505271168 19.0556818440678
134.09013028 175.259015193782 18.7221267592003
134.11613028 171.14546998922 18.5011064528163
134.14213028 170.666666666667 18.475208614068
134.16813028 182.259654561204 19.0923887746507
134.19413028 177.925561566977 18.8640166225
134.22013028 177.480361161272 18.8404013312494
134.24613028 185.153525574278 19.2433638210308
134.27213028 185.00787832295 19.2357936318182
134.29813028 214.926677672012 19.2484465048178
134.32413028 213.613852257481 19.4754844881922
134.35013028 211.140611458436 19.4394271016044
134.37613028 220.35274674751 19.4610020917996
134.40213028 225.679301391531 20.0757396439487
134.42813028 236.163212449739 20.3643268380671
134.45413028 214.792157244775 20.036705444626
134.48013028 236.11029995622 20.0773542507416
134.50613028 275.069667997045 21.1992098409553
134.53213028 297.564075588131 21.5698245861861
134.55813028 327.906369786515 22.414871775845
134.58413028 358.039833219491 23.0405090434595
134.61013028 357.282058264251 23.1692231138016
134.63613028 412.56794933338 23.9445069355416
134.66213028 448.740861277945 24.901180420928
134.68813028 451.499998358849 25.1154363104258
134.71413028 480.805670507626 25.7334240199211
134.74013028 536.082908521596 26.7119063233061
134.76613028 563.942894993322 27.1935133437133
134.79213028 508.533901955959 26.1685736848906
134.81813028 473.927845124181 25.4453910661963
134.84413028 462.95779736192 25.4740200597634
134.87013028 420.34848718954 24.4803525220352
134.89613028 388.832531991716 23.6809041753215
134.92213028 331.204637992416 22.5121911597371
134.94813028 280.647272516492 21.7566708731715
134.97413028 268.833430945192 21.8550562704695
135.00013028 261.700529049922 21.7242248578358
135.02613028 259.636432092471 21.6259729150177
135.05213028 232.102158911159 21.1387765074528
135.07813028 215.395414311596 20.8825295244545
135.10413028 210.515450782962 20.9804963382171
135.13013028 191.881906055369 20.2113891413365
135.15613028 181.463693780181 20.1930823115637
135.18213028 190.163959468182 21.1963570535044
135.20813028 190.536635386518 21.820875275043
135.23413028 154.953476399499 21.6209884418703
135.26013028 196.534113439729 23.1995033690975
135.28613028 155.322992180513 22.5118971568138
135.31213028 163.464598505462 23.4154484810023
135.33813028 159.1971098991 24.2095991514502
135.36413028 145.559335663122 24.2530264323539
135.39013028 125.390115221299 24.1967749031218
135.41613028 150.728398314891 25.556541240056
135.44213028 163.921635763665 24.1686611509419
135.46813028 129.001847976096 25.5977165411097
135.49413028 178.965490946329 25.7264921216857
135.52013028 135.694118294732 24.4191114409368
135.54613028 178.374899981121 24.7792531511956
135.57213028 155.730131621738 23.5597742569524
135.59813028 128.081088811934 22.0460441452483
135.62413028 167.426030979759 21.7387665018106
135.65013028 181.993183018013 21.2893246451282
135.67613028 184.63629336454 19.2164665516083
135.70213028 182.812077979704 19.1213011052964
135.72813028 152.141014433527 17.4436816316698
135.75413028 199.953837223422 20.5609126886442
135.78013028 180.58056185134 19.004239624428
135.80613028 166.05942214253 18.2241280802419
135.83213028 177.174963573943 18.8241846343444
135.85813028 168.873766155639 18.3779088122473
135.88413028 186.702056767366 19.323667186503
135.91013028 187.333333333333 19.356308187944
135.93613028 152.634308996286 17.4719380147874
135.96213028 153.78804911581 17.5378475940356
135.98813028 154.61766162814 17.5850880935036
136.01413028 171.775976126396 18.535154497678
136.04013028 173.333333333333 18.6189867250253
136.06613028 176.322418548216 18.7788401424697
136.09213028 167.798633947829 18.3193140672804
136.11813028 144.452348524334 16.9971967408943
136.14413028 150.002920200537 17.3206766727248
136.17013028 162.760485255189 18.0421997137372
136.19613028 150.548098307367 17.3521236917771
136.22213028 170.32511490602 18.4567123240311
136.24813028 161.981867415283 17.9989926059923
136.27413028 170.231296317498 18.4516284548274
136.30013028 161.901000916918 17.9944992104208
136.32613028 170.498370274433 18.466097057821
136.35213028 179.10892253783 18.9266437879424
136.37813028 163.039750787638 18.0576715435649
136.40413028 158.511823840604 17.8051578954304
136.43013028 153.109367898964 17.4991067142848
136.45613028 167.288345082496 18.2914376188694
136.48213028 174.634583688429 18.6887444034333
136.50813028 174.362604545895 18.6741856339652
136.53413028 173.042500936003 18.6033599618995
136.56013028 167.001050623346 18.2757243699584
136.58613028 171.18394398645 18.5031858871088
136.61213028 179.965764308858 18.97186149585
136.63813028 167.741093857914 18.316172845762
136.66413028 153.981538315773 17.5488767911666
136.69013028 157.252572091749 17.7342928864812
136.71613028 166.288458166025 18.2366914853558
136.74213028 158.687567377587 17.8150255333854
136.76813028 163.566276855884 18.0868060671797
136.79413028 170.412600914788 18.4614517801167
136.82013028 173.102582985067 18.6065893158885
136.84613028 175.465409049357 18.7331475758537
136.87213028 172.857949363004 18.5934369799133
136.89813028 173.755798409897 18.6416629306452
136.92413028 174.861420181453 18.7008780639548
136.95013028 182.576970122614 19.1090015501917
136.97613028 188.600739567852 19.4216754976419
137.00213028 175.770811285348 18.7494432602863
137.02813028 175.925348112285 18.7576836582924
137.05413028 170.08943223995 18.4439384210612
137.08013028 166.53496051154 18.2502033145683
137.10613028 169.668992609824 18.421128771594
137.13213028 174.751152025979 18.6949807181489
137.15813028 177.733547812541 18.8538350376013
137.18413028 171.407247189973 18.5152503191274
137.21013028 191.338156362539 19.5621142192013
137.23613028 203.427546545776 19.5972558693219
137.26213028 181.388067159993 19.0466830267106
137.28813028 183.139244373737 19.1384035057126
137.31413028 188.44698464844 19.4137572174188
137.34013028 210.140830565355 19.5622144935225
137.36613028 222.04836583392 19.737743420237
137.39213028 242.672001701267 20.0394365335685
137.41813028 231.466954451548 19.7815622444287
137.44413028 226.055199218225 19.6467798635562
137.47013028 256.503189182656 20.0819618557046
137.49613028 241.014021315046 19.7840836538977
137.52213028 249.061979926497 20.2448138996188
137.54813028 259.652903571276 20.9022687953832
137.57413028 280.03063448852 21.4384314573963
137.60013028 302.06479040084 21.7171099111704
137.62613028 309.796566606074 22.135582243527
137.65213028 318.976128085042 22.2861583726304
137.67813028 342.832293432178 23.0483426438023
137.70413028 348.675483421753 23.4076708024802
137.73013028 413.554020539548 24.2104917301384
137.75613028 448.823659314698 24.9473086268797
137.78213028 499.232019652835 25.7848927291001
137.80813028 526.976997807791 26.2211237004287
137.83413028 556.917130940954 26.9145308581743
137.86013028 601.9464159919 27.866414894305
137.88613028 619.765845749694 28.2688771962299
137.91213028 647.316889793855 28.6515108982568
137.93813028 647.495360389514 28.9517924132039
137.96413028 553.715861647471 27.4277821615443
137.99013028 567.001298887709 27.4445570399532
138.01613028 486.709603568013 25.9543914741147
138.04213028 518.328637048474 26.6828115578086
138.06813028 476.126932202955 26.065631536034
138.09413028 414.43118692965 25.0779368535863
138.12013028 389.737043369627 24.9322548125238
138.14613028 386.262436518368 24.8353821476713
138.17213028 305.018849979369 22.9894801264287
138.19813028 273.377622728554 22.6744228170902
138.22413028 259.739829247204 22.4024558233483
138.25013028 270.213657139192 22.6115085511759
138.27613028 259.799516842176 22.5840804316982
138.30213028 214.413165442965 21.9134151988831
138.32813028 189.918425109145 21.8210383277845
138.35413028 212.965104166021 22.6513139457417
138.38013028 210.475474225678 22.7755346797474
138.40613028 245.932585444328 23.8726573372606
138.43213028 216.756440695207 23.5693974035179
138.45813028 199.111163380007 23.8527427779732
138.48413028 190.571824734019 24.7091593405127
138.51013028 197.136824083417 25.6304662316866
138.53613028 173.35221102096 25.9443001695342
138.56213028 206.624291825465 27.088637024367
138.58813028 150.48545390027 26.672661275827
138.61413028 158.827534450843 27.467828469326
138.64013028 153.022110640861 27.7242775154682
138.66613028 157.287059030932 28.1397908691288
138.69213028 171.475912640212 27.9698629847777
138.71813028 169.574187536972 26.7473919890099
138.74413028 150.368517385757 26.2467683080142
138.77013028 180.595176483525 25.7639769668475
138.79613028 180.373628508785 26.0962506631205
138.82213028 173.880604407873 25.1191563758425
138.84813028 160.511350771843 23.734895566157
138.87413028 157.622618504527 23.2201527567112
138.90013028 159.953194035621 23.0387938762447
138.92613028 193.506872058469 22.137094228864
138.95213028 193.108716368608 21.4536394224067
138.97813028 193.199102734283 21.1680968557344
139.00413028 183.031474282422 21.1580350619953
139.03013028 177.573532979368 20.8226706835848
139.05613028 209.988911246034 20.5721879679082
139.08213028 183.887529445529 19.2383781749988
139.10813028 182.024839990861 19.0800859532058
139.13413028 179.343436374519 18.9390304067827
139.16013028 166.832399706896 18.2664939004121
139.18613028 177.25837606328 18.8286152471859
139.21213028 169.41077009146 18.4071056981514
139.23813028 157.843686377233 17.7675933303998
139.26413028 173.367562051474 18.6208250113401
139.29013028 166.451570031854 18.2456334519717
139.31613028 152.539902743509 17.4665338715791
139.34213028 161.401645051466 17.9667273064109
139.36813028 168.42439627107 18.3534408910738
139.39413028 140.675312240339 16.7735096053473
139.42013028 138.390829166959 16.63675624435
139.44613028 160.278987282345 17.9041328906119
139.47213028 163.095551128075 18.0607613974647
139.49813028 162.072587070584 18.0040321634118
139.52413028 167.077656805943 18.2799155799989
139.55013028 170.089517811377 18.4439430606027
139.57613028 161.379732234135 17.9655076318002
139.60213028 169.32422565435 18.4024034112042
139.62813028 172.685560999666 18.5841632041729
139.65413028 164.315033874528 18.1281567664519
139.68013028 157.444659322083 17.7451209813899
139.70613028 152.348542539421 17.455574613253
139.73213028 146.69756919383 17.1287809953791
139.75813028 151.706240429131 17.4187393590427
139.78413028 170.68972815419 18.4764568115313
139.81013028 168.329747723848 18.3482831743925
139.83613028 156.722675813152 17.704387920126
139.86213028 158.688425085328 17.8150736785077
139.88813028 159.663207706814 17.8697066403908
139.91413028 162.947318515072 18.0525520918829
139.94013028 166.313685695612 18.2380747720592
139.96613028 163.689404557097 18.0936123843249
139.99213028 165.21848738424 18.1779254803313
140.01813028 160.331222552387 17.9070501508421
140.04413028 166.776508529544 18.2634338791775
140.07013028 172.070718347138 18.5510494768969
140.09613028 167.353829761336 18.2950173414149
140.12213028 157.364362510144 17.7405953964428
140.14813028 156.407162472283 17.6865577471866
140.17413028 152.219335557717 17.4481709962802
140.20013028 158.197404762564 17.7874902536903
140.22613028 169.175576662899 18.394323943157
140.25213028 162.346059019326 18.0192152448061
140.27813028 154.33131277248 17.5687969293563
140.30413028 160.539414596672 17.9186726403867
140.33013028 159.620956891984 17.8673421018339
140.35613028 181.825288312178 18.2800207360007
140.38213028 159.16591665851 17.8418562183709
140.40813028 160.187261259986 17.8990089815043
140.43413028 162.036779357802 18.0020431816948
140.46013028 183.210988828376 18.1954032683813
140.48613028 161.727565108325 17.9848583596494
140.51213028 150.933351377351 17.3743115764252
140.53813028 151.366362531892 17.3992162198124
140.56413028 152.270045623692 17.4510770798648
140.59013028 164.921240250749 18.1615660255799
140.61613028 153.614055716472 17.5279237627548
140.64213028 205.678352863528 18.7051610098987
140.66813028 158.374612740065 17.7974499712776
140.69413028 160.666666666667 17.925772879665
140.72013028 159.86243205092 17.88085188412
140.74613028 152.966679602055 17.4909507804496
140.77213028 145.741766476786 17.0728888285952
140.79813028 156.605489737963 17.697767641031
140.82413028 169.356250123295 18.3008260158684
140.85013028 153.905301694061 17.544532008239
140.87613028 152.707400957915 17.4761209058483
140.90213028 153.674527628604 17.5313734560989
140.92813028 160.330054813676 17.9069849396081
140.95413028 175.554255126329 18.1299867994075
140.98013028 174.132516735958 18.3648561061815
141.00613028 161.409933159759 17.9671886036608
141.03213028 168.200310296771 18.3203889379957
141.05813028 133.622959854883 16.3476579273536
141.08413028 152.313313193571 17.4535562676247
141.11013028 146.835861844838 17.1368527941882
141.13613028 174.143030394629 18.3060706434086
141.16213028 159.877829523954 17.8817129785686
141.18813028 151.797061926186 17.4239525898222
141.21413028 138.283770466961 16.6303199287904
141.24013028 157.621498829394 17.7550837130887
141.26613028 146.561594659249 17.1208407888894
141.29213028 147.138022844467 17.154475966608
141.31813028 174.758360572703 18.3048011902394
141.34413028 159.134997387135 17.8401231714994
141.37013028 159.660207674192 17.8695387558936
141.39613028 146.77261435964 17.1331616673421
141.42213028 148.077599837305 17.2091603419403
141.44813028 152.599784667028 17.4699619156441
141.47413028 152.222815056672 17.4483704142634
141.50013028 175.317424809887 18.2128112304164
141.52613028 163.99419602845 18.1104498027216
141.55213028 154.504196255651 17.5786345462696
141.57813028 157.425863889683 17.7440617610334
141.60413028 160.755405985569 17.930722572477
141.63013028 174.471822883157 18.4096622808
141.65613028 153.641795748671 17.5295063107135
141.68213028 148.338013822458 17.2242859836022
141.70813028 159.076899706165 17.8368663002314
141.73413028 151.906235202039 17.4302171645702
141.76013028 171.845603537283 18.4833376698075
141.78613028 183.363894470528 18.8090621973401
141.81213028 166.935018267757 18.2721108943525
141.83813028 155.060233886466 17.6102375842273
141.86413028 167.505231225479 18.3032910278714
141.89013028 198.198050058206 18.4196794343874
141.91613028 162.292654303214 18.0162512362153
141.94213028 151.794283411965 17.4237931238846
141.96813028 160.784022177199 17.9323184322161
141.99413028 152.465219074897 17.462257533028
142.02013028 155.908036805742 17.6583145744854
142.04613028 152.833094335454 17.4833117192055
142.07213028 157.5508342728 17.7511033050231
142.09813028 166.252676494766 18.2347293094669
142.12413028 167.333333333333 18.293896978683
142.15013028 162.350787796759 18.0194776726052
142.17613028 159.41998241039 17.8560904125394
142.20213028 154.079311837743 17.5544474044467
142.22813028 142.428198513361 16.8776893272368
142.25413028 135.59622680657 16.4679219579503
142.28013028 152.526786340509 17.4657829106232
142.30613028 166.948748850384 18.2728623291691
142.33213028 153.876397481118 17.5428844538815
142.35813028 152.246928021279 17.4497523203786
142.38413028 158.762610219065 17.8192373697117
142.41013028 163.578560359023 18.0874851960698
142.43613028 164.593426045736 18.1435071607303
142.46213028 163.842376335384 18.1020648731234
142.48813028 170.729925156694 18.4786322630596
142.51413028 157.656061912535 17.7570302648013
142.54013028 151.965045963114 17.4335909073899
142.56613028 172.484572572063 18.5733450176355
142.59213028 187.826399766296 18.8725957975711
142.61813028 164.967793550207 18.1641291313515
142.64413028 159.075742972451 17.8368014493883
142.67013028 166.69788263985 18.2591282727216
142.69613028 170.714295777234 18.4777864354599
142.72213028 165.127480798334 18.172918356628
142.74813028 173.367977956049 18.6208473467804
142.77413028 156.25204201294 17.6777850429821
142.80013028 160.69259285666 17.9272191293943
142.82613028 160.324149617195 17.9066551660099
142.85213028 160.830561056817 17.9349134961291
142.87813028 154.231685563751 17.5631253234583
142.90413028 168.027035489505 18.3317776273609
142.93013028 183.138248163308 18.9525277970811
142.95613028 173.274124645495 18.615806436762
142.98213028 152.548334862433 17.4670166234782
143.00813028 148.750799209291 17.2482346464379
143.03413028 170.641086937186 18.4738240187129
143.06013028 162.910515440076 18.0505133134809
143.08613028 168.031927962753 18.3320445102423
143.11213028 174.640719083625 18.6890726941507
143.13813028 167.383220413623 18.2966237548693
143.16413028 148.290787287282 17.2215439079824
143.19013028 149.277588490961 17.2787492887049
143.21613028 163.238411184659 18.0686696347384
143.24213028 169.819556051611 18.4293003693364
143.26813028 154.963167705397 17.6047248036087
143.29413028 158.326605388076 17.7947523381516
143.32013028 167.468211280773 18.3012683320459
143.34613028 160.360191560713 17.9086678209582
143.37213028 168 18.3303027798234
143.39813028 167.736962516111 18.3159472873292
143.42413028 164.387021185322 18.1321273536958
143.45013028 155.349552084556 17.6266589054509
143.47613028 164.343458621135 18.1297246874372
143.50213028 176.82100227737 18.8053716941394
143.52813028 158.490275935503 17.8039476485134
143.55413028 167.765368194191 18.3174980930362
143.58013028 162 18
143.60613028 162.179766680854 18.0099842687801
143.63213028 171.476522489427 18.5189914676489
143.65813028 200.647026468424 18.9558992279745
143.68413028 164.897802229321 18.1602754510674
143.71013028 154.870951211878 17.5994858568015
143.73613028 150.788069655076 17.3659476939829
143.76213028 160.263936269822 17.9032922262818
143.78813028 163.832682225781 18.1015293401293
143.81413028 147.708705497345 17.1877110458226
143.84013028 169.605682036749 18.4176916054509
143.86613028 148.63906784692 17.2417555861878
143.89213028 160.015027295326 17.8893838516214
143.91813028 151.131143678635 17.3856920298638
143.94413028 150 17.3205080756888
143.97013028 167.020073313503 18.2767652123401
143.99613028 189.782953401073 18.927669102261
144.02213028 170.324932758324 18.456702455115
144.04813028 149.287201677797 17.2793056386996
144.07413028 153.285715227588 17.5091813188161
144.10013028 149.682243726131 17.3021526826075
144.12613028 147.572246847768 17.1797698964665
144.15213028 143.549167999235 16.9439763927618
144.17813028 160.821992990924 17.9344357586697
144.20413028 169.024890603336 18.3861301313428
144.23013028 167.916998149739 18.3257740982333
144.25613028 163.734384127427 18.0960981500116
144.28213028 175.862205883865 18.7543171501319
144.30813028 160.464670781313 17.9145008739464
144.33413028 175.748804689953 18.7482695036077
144.36013028 174.555162562054 18.6844942431982
144.38613028 171.814394625573 18.5372271187237
144.41213028 166.781089264306 18.263684691995
144.43813028 167.005824510651 18.2759855827614
144.46413028 164.310266343391 18.1278937741477
144.49013028 169.940296192341 18.4358507366674
144.51613028 166.165541595192 18.2299501697175
144.54213028 158.694317569456 17.8154044337734
144.56813028 159.709967487833 17.8723231555292
144.59413028 168.611754107324 18.3636463757787
144.62013028 165.500698541941 18.1934437939573
144.64613028 168.386848808806 18.3513949774291
144.67213028 173.483262293281 18.6270374613507
144.69813028 172.794951145243 18.5900484746675
144.72413028 164.49370629257 18.1380101605755
144.75013028 155.448801051901 17.6322886235396
144.77613028 149.611959735287 17.2980900526785
144.80213028 153.712132913262 17.5335183527586
144.82813028 160.878318524548 17.9375761196739
144.85413028 161.218691541629 17.9565415123085
144.88013028 160 17.8885438199983
144.90613028 166.975281156342 18.2743142774957
144.93213028 191.332855334667 18.4935384205697
144.95813028 174.618244643738 18.68787011105
144.98413028 167.662252805987 18.3118678897587
145.01013028 168.322304610933 18.3478775127225
145.03613028 163.299940930067 18.0720746418372
145.06213028 170.005403720464 18.4393819701455
145.08813028 184.065263092043 18.7075486156558
145.11413028 161.420490242588 17.9677761697205
145.14013028 154.137430294602 17.557757846297
145.16613028 162.340667394559 18.0189160270289
145.19213028 171.473342016618 18.518819725707
145.21813028 170.059918969882 18.4423381906895
145.24413028 159.333333333333 17.8512371186612
145.27013028 162.919517245449 18.0510120073889
145.29613028 163.176761762627 18.0652573611685
145.32213028 154.728778810841 17.5914057886708
145.34813028 154.109508731524 17.5561675049838
145.37413028 155.260597603441 17.6216115950523
145.40013028 162.884591574414 18.0490770719399
145.42613028 159.367865726288 17.8531714676294
145.45213028 156.456814704991 17.6893648673428
145.47813028 155.390288700137 17.6289698337786
145.50413028 161.275022814636 17.9596783275556
145.53013028 171.256378982703 18.5071002041218
145.55613028 152.666666666667 17.4737898961082
145.58213028 150.545334829823 17.3519644322954
145.60813028 147.04894574555 17.1492825357535
145.63413028 154 17.5499287747842
145.66013028 151.959870117205 17.4332940156016
145.68613028 147.437788219934 17.1719415454359
145.71213028 152.654819844157 17.4731119062494
145.73813028 146.704218160776 17.1291691661199
145.76413028 156.175155872727 17.6734351993452
145.79013028 171.84702822171 18.5389874708254
145.81613028 162.636723688983 18.0353388484377
145.84213028 151.327548430316 17.3969852808075
145.86813028 159.040141741389 17.8348053951474
145.89413028 162.32908316865 18.0182731230631
145.92013028 148.666666666667 17.2433562085034
145.94613028 152.201789403651 17.4471653516353
145.97213028 174.495134303546 18.681281235694
145.99813028 159.27691757942 17.8480765114575
146.02413028 166.140499771321 18.228576454091
146.05013028 131.154202841811 16.1959379377553
146.07613028 144.201953099619 16.9824587795536
146.10213028 154.355303736129 17.5701624202014
146.12813028 150.45438668313 17.3467222657844
146.15413028 158.18750417124 17.7869336408072
146.18013028 161.482647496811 17.9712352105697
146.20613028 148.558650124697 17.2370908290638
146.23213028 168.461356685881 18.3554545945275
146.25813028 156.657084170022 17.7006827083038
146.28413028 155.336980560131 17.6259456801688
146.31013028 144.143454077042 16.9790137568142
146.33613028 158.987106585992 17.8318314587141
146.36213028 147.723360907444 17.1885636926093
146.38813028 160.739389067386 17.929829283481
146.41413028 156.910952120695 17.7150191713526
146.44013028 172.920667623156 18.5968098136834
146.46613028 161.629219575592 17.979389287492
146.49213028 145.980486838676 17.0868655310841
146.51813028 156.772852622229 17.7072218386866
146.54413028 153.809138947599 17.5390500853153
146.57013028 165.174924820065 18.1755288682374
146.59613028 160.226554827901 17.9012041398282
146.62213028 150.071735719025 17.3246492443007
146.64813028 159.539131460963 17.8627619063214
146.67413028 154.545891803909 17.5810063309191
146.70013028 156.687364927721 17.7023933369316
146.72613028 160.095285353386 17.893869640376
146.75213028 161.212442208956 17.9561934835285
146.77813028 163.489976055606 18.082586986137
146.80413028 156.0118127173 17.6641904834215
146.83013028 163.992688185392 18.110366544352
146.85613028 153.683764281539 17.5319003123757
146.88213028 154.614311103152 17.5848975603017
146.90813028 162.073036463554 18.0040571240792
146.93413028 158.505813387337 17.8048203241334
146.96013028 162.088089800393 18.0048932127015
146.98613028 160.596307492402 17.9218474210892
147.01213028 154.537064082551 17.580504206794
147.03813028 164.964980313961 18.1639742520166
147.06413028 163.470439177086 18.0815065288867
147.09013028 169.862313464971 18.4316203012633
147.11613028 159.045473219584 17.8351043293603
147.14213028 161.377604945947 17.9653892218313
147.16813028 157.201244904957 17.7313984166482
147.19413028 163.066416099419 18.0591481581729
147.22013028 172.933746979773 18.5975131122294
147.24613028 166.511376771962 18.2489110235084
147.27213028 158.438985178255 17.8010665510949
147.29813028 164.397072143456 18.1326816628681
147.32413028 164.530350320221 18.1400303373628
147.35013028 149.524321652176 17.2930229660506
147.37613028 141.720352194317 16.8356973240978
147.40213028 146.945251990419 17.1432349333735
147.42813028 150.292877528962 17.3374091218361
147.45413028 155.14043986148 17.6147915038174
147.48013028 153.564382707746 17.5250895979305
147.50613028 154.683724057087 17.5888444223654
147.53213028 160.347329690657 17.9079496141047
147.55813028 163.733100127092 18.0960271953317
147.58413028 164.996166830594 18.1656911143283
147.61013028 156.783631223456 17.7078305403828
147.63613028 153.208702437731 17.5047823429902
147.66213028 156.352411284615 17.6834618378085
147.68813028 160.922248325293 17.9400249902442
147.71413028 163.957435739177 18.1084199056227
147.74013028 156.250504713339 17.6776980805386
147.76613028 148.076503250157 17.209096620692
147.79213028 145.229028813559 17.0428300944156
147.81813028 146.549132423451 17.1201128748295
147.84413028 156.443679233492 17.6886222885499
147.87013028 168.693317558584 18.3680874104292
147.89613028 155.458915097922 17.6328622235825
147.92213028 139.070080687225 16.6775346311872
147.94813028 149.003265190483 17.262865648002
147.97413028 158.514808836541 17.8053255424629
148.00013028 156.757266028501 17.7063415774406
148.02613028 158.013797702364 17.777164999086
148.05213028 152.279079826767 17.4515947596068
148.07813028 160.582490721519 17.9210764588246
148.10413028 162.255884716614 18.0142102084223
148.13013028 161.63720059403 17.9798331802066
148.15613028 135.139129819622 16.4401417159112
148.18213028 161.455665181047 17.9697337309737
148.20813028 165.684019905154 18.2035172373447
148.23413028 165.148110848969 18.1740535296322
148.26013028 156.451714042502 17.6890765187164
148.28613028 147.376299552739 17.1683604081892
148.31213028 159.773363632513 17.8758699722566
148.33813028 157.378011553191 17.7413647475717
148.36413028 160.8139246935 17.9339858756217
148.39013028 164 18.1107702762748
148.41613028 159.715146275039 17.8726129189349
148.44213028 145.414857413897 17.0537302320575
148.46813028 166.143690632109 18.2287515004242
148.49413028 156.974406087601 17.718600739765
148.52013028 157.707017214095 17.7598996176271
148.54613028 153.608301503655 17.5275954713506
148.57213028 164.744616996334 18.151838308906
148.59813028 168.325352077929 18.3480436056779
148.62413028 156.236904812187 17.6769287384538
148.65013028 163.119531086874 18.0620890866408
148.67613028 154.103908917356 17.5558485364482
148.70213028 147.553051781107 17.1786525537428
148.72813028 144.10925652295 16.9769995301261
148.75413028 172.699382419194 18.5849069095971
148.78013028 139.024462603225 16.67479910543
148.80613028 146.341846138106 17.1080008264032
148.83213028 138.096317145161 16.6190443254214
148.85813028 167.770649913516 18.3177864336014
148.88413028 152.72373364642 17.4770554525881
148.91013028 163.9446143305 18.1077118560297
148.93613028 138.385040848933 16.636408317238
148.96213028 158.805726805298 17.8216568705212
148.98813028 154.82838462672 17.5970670639581
149.01413028 166.768702211909 18.2630064453752
149.04013028 170.485005220846 18.4653732819483
149.06613028 156.321117803704 17.6816921024943
149.09213028 163.972798490176 18.1092682618695
149.11813028 154.898829989236 17.6010698532354
149.14413028 169.096873265448 18.3900447669628
149.17013028 159.915985426518 17.8838466458711
149.19613028 154.532150216432 17.5802246980198
149.22213028 168.016728290917 18.3312153601946
149.24813028 170.577415483734 18.470377120337
149.27413028 162.67545795849 18.03748640795
149.30013028 160.769147573042 17.9314889271941
149.32613028 157.878812173811 17.7695701790342
149.35213028 148.518036743741 17.23473450586
149.37813028 151.021396067697 17.3793783587156
149.40413028 157.914989447488 17.7716059739961
149.43013028 155.615553171528 17.6417432909295
149.45613028 169.352571185706 18.4039436635579
149.48213028 172.297569876843 18.5632739502946
149.50813028 156.661994004298 17.7009600871985
149.53413028 164.616300120066 18.1447678475127
149.56013028 167.670592380504 18.3123233032024
149.58613028 155.539198580685 17.6374146960763
149.61213028 168.301593020718 18.3467486504132
149.63813028 162.233660160797 18.0129764425981
149.66413028 145.543890928401 17.0612948470156
149.69013028 154.615551700962 17.5849681092098
149.71613028 165.250146394217 18.1796670153343
149.74213028 144.746677781622 17.0145042702761
149.76813028 146.018192731444 17.0890721065507
149.79413028 157.700544038695 17.7595351312299
149.82013028 143.39112563182 16.9346464758978
149.84613028 147.608757252789 17.181894962593
149.87213028 157.845286147907 17.7676833688529
149.89813028 160.569465155458 17.9203496146396
149.92413028 168.225627676106 18.3426076486472
149.95013028 179.04769414292 18.9234084743167
149.97613028 171.959552022527 18.5450560539744
